# Supplementary material
Source: publisher figshare collection journal article supplement (https://gsapubs.figshare.com/ndownloader/files/30942679)
Supplement: Supplementary file 1 [file 30942679]

## Sheet: Sheet1
Table S1. U-Pb geochronologic analyses.
DeGray Lake Spillway Samples (J1 to J3)
PennJ1 (PennJ1A)							Isotope ratios						Apparent ages (Ma)
Analysis	U	206Pb	U/Th	206Pb*	±	207Pb*	±	206Pb*	±	error	206Pb*	±	207Pb*	±	206Pb*	±	Best age	±	Conc
	(ppm)	204Pb		207Pb*	(%)	235U*	(%)	238U	(%)	corr.	238U*	(Ma)	235U	(Ma)	207Pb*	(Ma)	(Ma)	(Ma)	(%)
-PENN J-1 Spot 102	93.094	8356.94	1.47267	18.9494	1.84546	0.367145	2.24559	0.0504802	1.27942	0.569749	317.469	3.96337	317.535	6.12333	317.999	41.935	317.469	3.96337	NA
-PENN J-1 Spot 15	51.8035	5175.88	1.08549	19.1496	2.34981	0.426082	2.62306	0.0592025	1.16569	0.444402	370.774	4.20014	360.391	7.95784	294.073	53.6634	370.774	4.20014	NA
-PENN J-1 Spot 77	138.765	11421	0.621249	18.4889	1.67443	0.467241	2.05268	0.0626818	1.18735	0.578438	391.914	4.51476	389.282	6.63739	373.647	37.6836	391.914	4.51476	NA
-PENN J-1 Spot 189	639.583	13372.8	2.40766	16.9758	1.41414	0.510431	1.89726	0.0628718	1.26483	0.666662	393.067	4.8231	418.739	6.51027	562.699	30.8041	393.067	4.8231	NA
-PENN J-1 Spot 308	39.4227	46839.8	1.05739	18.2219	2.08132	0.484221	2.34686	0.0640214	1.08439	0.462059	400.035	4.20609	400.965	7.77448	406.301	46.6079	400.035	4.20609	98.4579
-PENN J-1 Spot 84	79.102	9605.69	1.61819	18.1935	1.83526	0.486704	2.21013	0.0642495	1.23145	0.557186	401.417	4.79249	402.662	7.34675	409.788	41.0537	401.417	4.79249	97.9573
-PENN J-1 Spot 216	194.143	109710	1.82809	17.7263	0.89988	0.502603	1.37393	0.0646443	1.03822	0.755658	403.808	4.06382	413.463	4.66637	467.691	19.9429	403.808	4.06382	86.3408
-PENN J-1 Spot 69	29.0901	2676.23	3.28695	18.6473	2.34348	0.478025	2.78498	0.0646776	1.50472	0.5403	404.01	5.89265	396.717	9.14601	354.416	52.9362	404.01	5.89265	113.993
-PENN J-1 Spot 90	315.426	24876.4	3.52392	18.126	1.02191	0.496463	1.89729	0.0652945	1.59856	0.842552	407.744	6.31619	409.305	6.39131	418.099	22.8244	407.744	6.31619	97.5233
-PENN J-1 Spot 99	267.924	45716	2.26217	17.9094	0.815589	0.502602	1.50931	0.065312	1.26998	0.841427	407.85	5.01915	413.462	5.12617	444.888	18.1534	407.85	5.01915	91.6747
-PENN J-1 Spot 115	1061.88	54094.4	4.99513	18.1551	1.07978	0.496269	1.91907	0.0653737	1.58648	0.826691	408.223	6.27556	409.174	6.463	414.52	24.1329	408.223	6.27556	98.4808
-PENN J-1 Spot 193	441.583	23104	1.02275	17.1279	1.76982	0.526935	2.31038	0.0654862	1.48513	0.642806	408.904	5.88415	429.774	8.09579	543.236	38.6792	408.904	5.88415	75.2718
-PENN J-1 Spot 285	412.19	7791.5	1.48863	15.7763	0.89411	0.572677	1.85288	0.0655544	1.62288	0.875868	409.316	6.43622	459.744	6.85101	720.275	18.9574	409.316	6.43622	56.8278
-PENN J-1 Spot 42	496.276	7664.3	20.0729	15.3526	2.78605	0.590147	3.29655	0.0657402	1.76216	0.534547	410.44	7.00719	470.962	12.4232	777.779	58.5943	410.44	7.00719	52.7708
-PENN J-1 Spot 64	79.3021	8353.14	9.57325	18.1145	1.46372	0.500876	2.0525	0.065833	1.43884	0.701019	411.002	5.72908	412.295	6.95512	419.52	32.686	411.002	5.72908	97.9694
-PENN J-1 Spot 39	203.568	8944.88	1.49581	18.3933	1.55285	0.495577	1.91982	0.066139	1.12888	0.588013	412.852	4.5145	408.704	6.4595	385.314	34.8828	412.852	4.5145	107.147
-PENN J-1 Spot 9	391.996	34522.2	8.04417	17.8122	0.966831	0.515061	1.93706	0.0665679	1.67852	0.866531	415.445	6.75339	421.847	6.68663	457.012	21.4493	415.445	6.75339	90.9047
-PENN J-1 Spot 53	70.118	5021.99	0.938811	18.4685	1.66022	0.497813	2.22498	0.066709	1.48129	0.665752	416.298	5.97167	410.221	7.50884	376.14	37.3351	416.298	5.97167	110.676
-PENN J-1 Spot 169	803.618	30789.3	2.28945	17.2301	1.01411	0.535516	1.92792	0.0669495	1.63965	0.850477	417.751	6.63246	435.464	6.82723	530.266	22.2152	417.751	6.63246	78.7815
-PENN J-1 Spot 147	1028.87	2488.14	1.16206	11.8572	5.59958	0.780494	5.78388	0.0671492	1.44846	0.25043	418.958	5.87544	585.765	25.7497	1299.47	108.904	418.958	5.87544	32.2408
-PENN J-1 Spot 28	509.446	59831	2.81678	18.5051	0.896239	0.50044	1.7863	0.067194	1.54519	0.865025	419.228	6.27174	412	6.04954	371.682	20.1736	419.228	6.27174	112.792
-PENN J-1 Spot 160	264.06	71789.8	1.68864	17.8236	0.933297	0.520063	1.58294	0.067257	1.27853	0.807697	419.609	5.19396	425.193	5.4991	455.575	20.7317	419.609	5.19396	92.1053
-PENN J-1 Spot 174	168.956	36511.5	2.07796	17.6739	1.1483	0.525281	1.66641	0.0673616	1.20761	0.724677	420.24	4.91298	428.673	5.82718	474.273	25.4209	420.24	4.91298	88.6072
-PENN J-1 Spot 149	207.248	9934.02	1.32246	18.2705	1.04299	0.510369	1.45926	0.0676586	1.02059	0.699391	422.034	4.16928	418.697	5.00687	400.334	23.3686	422.034	4.16928	105.42
-PENN J-1 Spot 33	124.16	17714.9	1.20356	18.1712	1.23443	0.513275	1.71356	0.067674	1.18847	0.693568	422.127	4.85613	420.649	5.90156	412.534	27.5993	422.127	4.85613	102.326
-PENN J-1 Spot 290	136.853	28352.1	1.03485	18.5818	1.17078	0.501941	1.52817	0.0676751	0.982129	0.642684	422.133	4.01307	413.015	5.18566	362.355	26.3895	422.133	4.01307	116.497
-PENN J-1 Spot 37	469.771	64370.9	2.10439	17.0099	0.917977	0.549818	1.6735	0.0678591	1.39925	0.836125	423.245	5.73204	444.878	6.02835	558.377	20.0255	423.245	5.73204	75.799
-PENN J-1 Spot 302	67.2233	5192.62	2.58996	18.3813	1.63855	0.511535	2.00653	0.0682242	1.15814	0.577187	425.448	4.76822	419.48	6.89507	386.778	36.8004	425.448	4.76822	109.998
-PENN J-1 Spot 262	111.951	8606.22	2.12525	18.1342	1.98387	0.519276	2.32466	0.0683257	1.21174	0.521254	426.06	4.99583	424.667	8.0679	417.092	44.3223	426.06	4.99583	102.15
-PENN J-1 Spot 59	31.4159	7467.02	1.75777	18.151	1.62871	0.52181	2.19673	0.0687229	1.47408	0.671035	428.457	6.11049	426.36	7.64832	415.016	36.399	428.457	6.11049	103.239
-PENN J-1 Spot 196	190.225	46424.1	2.24026	17.7663	1.00641	0.537359	1.56461	0.0692708	1.19797	0.765669	431.761	5.00296	436.682	5.55301	462.733	22.3264	431.761	5.00296	93.3067
-PENN J-1 Spot 32	242.976	73294.9	1.61405	17.5921	1.05706	0.545987	1.68165	0.0696927	1.30789	0.777741	434.304	5.49311	442.364	6.03043	484.494	23.3522	434.304	5.49311	89.6408
-PENN J-1 Spot 23	642.084	3534.42	6.63684	12.8765	1.18792	0.746516	2.03849	0.0697468	1.65659	0.812656	434.63	6.9627	566.201	8.84743	1137.35	23.6153	434.63	6.9627	38.2143
-PENN J-1 Spot 243	204.95	27292.6	0.966904	18.0495	0.919208	0.53381	1.25416	0.0699102	0.853215	0.680307	435.615	3.59393	434.335	4.43201	427.533	20.4976	435.615	3.59393	101.89
-PENN J-1 Spot 170	375.114	11019.1	2.69787	16.1211	0.942686	0.597763	1.65777	0.0699216	1.36366	0.822582	435.684	5.7449	475.813	6.29763	674.249	20.1804	435.684	5.7449	64.6176
-PENN J-1 Spot 55	175.714	13734.1	1.09651	18.2348	1.27054	0.530716	1.74952	0.0702185	1.20273	0.687462	437.472	5.08704	432.285	6.15916	404.713	28.4459	437.472	5.08704	108.095
-PENN J-1 Spot 45	455.659	113693	1.13322	17.4968	0.972397	0.555958	2.07727	0.0705812	1.83562	0.883668	439.656	7.80135	448.892	7.53659	496.513	21.4054	439.656	7.80135	88.5488
-PENN J-1 Spot 138	344.964	180451	2.32527	17.7681	0.960459	0.547842	1.97911	0.0706292	1.73044	0.874349	439.945	7.35901	443.582	7.11273	462.511	21.3095	439.945	7.35901	95.121
-PENN J-1 Spot 253	201.878	13663.5	0.98766	18.0596	1.19491	0.540335	1.814	0.0708042	1.36484	0.752394	440.999	5.81769	438.645	6.46132	426.289	26.6506	440.999	5.81769	103.451
-PENN J-1 Spot 89	946.301	2862.7	1.09541	12.3873	4.34099	0.790214	4.61529	0.0710248	1.56741	0.339612	442.327	6.70056	591.293	20.6885	1213.96	85.437	442.327	6.70056	36.4367
-PENN J-1 Spot 294	164.814	12662.6	1.6049	18.2907	1.61647	0.53615	2.1008	0.071155	1.34179	0.638703	443.11	5.74587	435.883	7.44519	397.857	36.235	443.11	5.74587	111.374
-PENN J-1 Spot 96	720.545	29065.4	2.58219	16.8121	1.45294	0.585912	2.0941	0.071473	1.50806	0.720147	445.024	6.48483	468.254	7.8558	583.778	31.5444	445.024	6.48483	76.2317
-PENN J-1 Spot 107	61.0941	10310.1	0.859362	17.8112	1.28477	0.554306	1.79431	0.0716359	1.25255	0.698072	446.004	5.39757	447.814	6.49748	457.115	28.503	446.004	5.39757	97.5693
-PENN J-1 Spot 235	275.396	2867.81	2.88612	12.121	6.64815	0.81794	6.80786	0.0719363	1.46596	0.215334	447.811	6.34191	606.899	31.1113	1256.61	130.133	447.811	6.34191	35.6364
-PENN J-1 Spot 54	249.899	36772.7	1.78973	17.9208	0.991717	0.555781	1.6214	0.0722684	1.28275	0.791136	449.808	5.57321	448.777	5.88141	443.477	22.0639	449.808	5.57321	101.428
-PENN J-1 Spot 12	725.449	334029	1.47331	17.1067	0.877225	0.585144	1.58868	0.0726301	1.32453	0.833729	451.982	5.78157	467.762	5.95477	545.95	19.1668	451.982	5.78157	82.7881
-PENN J-1 Spot 227	246.759	27566.2	1.63821	17.3377	0.840091	0.578373	2.00196	0.0727591	1.81717	0.907694	452.757	7.94509	463.415	7.4489	516.568	18.4475	452.757	7.94509	87.647
-PENN J-1 Spot 233	809.25	151109	3.23898	17.5701	0.861985	0.575113	1.794	0.0733188	1.57334	0.877004	456.119	6.92833	461.316	6.65119	487.252	19.0237	456.119	6.92833	93.6107
-PENN J-1 Spot 249	63.0315	22684.3	1.66084	17.8578	0.935987	0.567867	1.58179	0.0735804	1.27515	0.80614	457.69	5.63386	456.634	5.81731	451.302	20.8064	457.69	5.63386	101.416
-PENN J-1 Spot 26	220.384	16391.5	1.50943	17.8408	0.83957	0.572076	1.1912	0.0740551	0.845038	0.709398	460.54	3.75597	459.356	4.40148	453.46	18.6462	460.54	3.75597	101.561
-PENN J-1 Spot 200	56.3633	10617	1.54124	17.4627	1.65312	0.584722	2.02967	0.0740879	1.17762	0.5802	460.737	5.23636	467.491	7.60432	500.803	36.4015	460.737	5.23636	91.9996
-PENN J-1 Spot 168	838.038	10552.9	3.10143	15.6514	0.949741	0.657695	1.73824	0.0746904	1.45583	0.837536	464.352	6.52246	513.203	7.00269	737.121	20.1023	464.352	6.52246	62.9954
-PENN J-1 Spot 130	514.263	36385.9	3.32634	17.6586	0.710949	0.584134	1.744	0.0748439	1.59251	0.913136	465.273	7.14842	467.115	6.52983	476.175	15.734	465.273	7.14842	97.7105
-PENN J-1 Spot 67	547.085	47816.5	1.45576	17.7669	0.943092	0.581485	1.88432	0.0749614	1.63133	0.86574	465.977	7.3334	465.415	7.03502	462.664	20.9238	465.977	7.3334	100.716
-PENN J-1 Spot 156	22.1411	1391.16	1.3985	19.1363	3.18596	0.546674	3.44707	0.0759056	1.31604	0.381784	471.637	5.9853	442.816	12.3717	295.664	72.7104	471.637	5.9853	159.518
-PENN J-1 Spot 199	192.084	21141	2.36874	17.6549	0.943466	0.609013	1.39843	0.0780154	1.03223	0.73813	484.266	4.81558	482.938	5.37457	476.618	20.8387	484.266	4.81558	101.605
-PENN J-1 Spot 155	270.012	24760.2	1.36091	17.3899	1.03919	0.624964	1.87227	0.0788571	1.5574	0.831823	489.297	7.33827	492.954	7.31167	509.997	22.8641	489.297	7.33827	95.9411
-PENN J-1 Spot 14	78.5215	4824.66	2.22084	17.8558	1.00211	0.683952	1.57883	0.088612	1.22003	0.772742	547.323	6.40187	529.16	6.51128	451.547	22.2655	547.323	6.40187	121.211
-PENN J-1 Spot 164	145.222	33495.6	2.12993	16.8893	1.11027	0.72512	1.67871	0.0888608	1.25911	0.750048	548.796	6.624	553.685	7.16478	573.822	24.1479	548.796	6.624	95.6388
-PENN J-1 Spot 131	31.6242	8943.74	2.37099	16.5018	1.98526	0.754772	2.34692	0.0903721	1.2517	0.533336	557.737	6.6877	570.989	10.2503	624.09	42.7959	557.737	6.6877	89.368
-PENN J-1 Spot 240	691.572	35653.5	1.89163	16.3263	1.01999	0.772025	1.73418	0.0914548	1.40249	0.808738	564.136	7.57566	580.924	7.67173	647.142	21.9248	564.136	7.57566	87.1734
-PENN J-1 Spot 63	79.6939	580097	1.75203	15.4179	1.23524	0.853748	1.78241	0.0955085	1.28498	0.720924	588.033	7.22173	626.704	8.33539	768.855	26.0127	588.033	7.22173	76.4817
-PENN J-1 Spot 85	80.2478	31857.1	2.12692	16.026	1.03566	0.888375	1.89239	0.103302	1.58384	0.836952	633.731	9.55967	645.496	9.03981	686.868	22.11	633.731	9.55967	92.2639
-PENN J-1 Spot 152	214.457	67680	1.22127	16.0269	1.02982	0.898677	1.79113	0.104506	1.46548	0.818186	640.762	8.93863	651.02	8.60836	686.738	21.9863	640.762	8.93863	93.3052
-PENN J-1 Spot 36	642.804	48864.3	3.75961	15.6402	0.818912	1.11451	1.69784	0.126477	1.4873	0.875993	767.738	10.7648	760.341	9.08684	738.633	17.3291	767.738	10.7648	103.94
-PENN J-1 Spot 288	322.106	74158.4	2.08802	14.387	0.759586	1.4527	1.44859	0.151647	1.23347	0.851496	910.188	10.4704	910.99	8.71201	912.956	15.6415	912.956	15.6415	99.6968
-PENN J-1 Spot 187	277.79	29662.3	5.22867	14.1932	1.05734	1.50653	2.32897	0.155148	2.07512	0.891004	929.756	17.9668	933.034	14.2143	940.797	21.6689	940.797	21.6689	98.8264
-PENN J-1 Spot 207	35.5368	3625.52	1.54129	14.1108	1.25872	1.63749	1.71341	0.167656	1.16249	0.678468	999.182	10.76	984.747	10.8018	952.69	25.7502	952.69	25.7502	104.88
-PENN J-1 Spot 292	53.9409	30382.4	2.44556	14.0621	1.10089	1.48527	1.43666	0.151546	0.923059	0.642504	909.623	7.83088	924.388	8.7182	959.8	22.5121	959.8	22.5121	94.7721
-PENN J-1 Spot 212	29.541	3456.48	1.54823	14.0344	1.98965	1.57649	2.42142	0.160536	1.38007	0.569941	959.753	12.3064	960.986	15.0451	963.827	40.6288	963.827	40.6288	99.5773
-PENN J-1 Spot 224	258.801	84280.4	1.60569	14.0076	0.887837	1.49977	1.45734	0.152432	1.15568	0.793004	914.58	9.85406	930.293	8.87824	967.715	18.1198	967.715	18.1198	94.5092
-PENN J-1 Spot 127	4.9011	4237.23	1.65208	13.9877	2.70293	1.45688	2.9811	0.147862	1.25742	0.421799	888.968	10.4416	912.72	17.9511	970.594	55.1296	970.594	55.1296	91.5901
-PENN J-1 Spot 269	99.6684	30673.2	2.53203	13.9583	0.976953	1.55775	1.57332	0.157767	1.23325	0.78385	944.356	10.8334	953.573	9.72969	974.895	19.9205	974.895	19.9205	96.8675
-PENN J-1 Spot 220	49.519	47183	3.60163	13.9572	0.870603	1.54694	1.39831	0.15666	1.09422	0.782531	938.191	9.55381	949.275	8.6238	975.055	17.751	975.055	17.751	96.2193
-PENN J-1 Spot 113	82.9805	12191	2.70519	13.9512	1.15424	1.6492	1.74931	0.166945	1.31447	0.75142	995.259	12.1225	989.245	11.0579	975.932	23.5275	975.932	23.5275	101.98
-PENN J-1 Spot 293	20.2562	3435.66	3.30384	13.8307	1.78206	1.72154	2.50429	0.172763	1.75946	0.70258	1027.31	16.7085	1016.6	16.0862	993.575	36.2291	993.575	36.2291	103.396
-PENN J-1 Spot 251	42.6218	10462	4.27478	13.8228	1.26277	1.64932	2.09504	0.165421	1.6717	0.797935	986.832	15.2963	989.293	13.2439	994.753	25.6566	994.753	25.6566	99.2037
-PENN J-1 Spot 309	169.483	25922.5	1.92393	13.8174	0.875154	1.65217	1.42189	0.165642	1.12066	0.788147	988.052	10.2659	990.384	8.99415	995.533	17.7852	995.533	17.7852	99.2486
-PENN J-1 Spot 44	50.8602	53370.2	1.85965	13.8018	0.985941	1.67567	1.53048	0.167808	1.1706	0.764855	1000.02	10.8434	999.341	9.73258	997.831	20.0307	997.831	20.0307	100.22
-PENN J-1 Spot 221	442.85	84608.7	2.7624	13.7979	1.08737	1.54231	1.92462	0.15441	1.58801	0.825103	925.634	13.6926	947.429	11.856	998.399	22.0796	998.399	22.0796	92.7119
-PENN J-1 Spot 2	461.601	93202.6	4.89749	13.7923	0.945758	1.68962	2.1081	0.169089	1.88405	0.893718	1007.09	17.5662	1004.62	13.4476	999.224	19.1909	999.224	19.1909	100.787
-PENN J-1 Spot 8	74.9485	33252	4.58332	13.7684	1.18807	1.55701	1.49291	0.155548	0.904027	0.605547	931.987	7.84469	953.281	9.2307	1002.74	24.1181	1002.74	24.1181	92.944
-PENN J-1 Spot 203	61.4333	17790.3	1.54018	13.7626	1.16674	1.71138	1.5152	0.170898	0.966725	0.638017	1017.05	9.09574	1012.8	9.71113	1003.6	23.6632	1003.6	23.6632	101.341
-PENN J-1 Spot 291	841.221	126344	5.59608	13.7126	0.736146	1.68612	1.79466	0.167763	1.63673	0.912001	999.774	15.1578	1003.3	11.4391	1010.99	14.926	1010.99	14.926	98.8905
-PENN J-1 Spot 206	181.097	116075	4.118	13.6964	0.971413	1.66254	1.48493	0.165222	1.12311	0.756339	985.732	10.266	994.347	9.41511	1013.38	19.6691	1013.38	19.6691	97.2717
-PENN J-1 Spot 257	87.9692	10647.5	2.12958	13.6919	0.928575	1.65457	1.77327	0.164375	1.51071	0.851933	981.044	13.7481	991.299	11.2231	1014.05	18.8179	1014.05	18.8179	96.7456
-PENN J-1 Spot 20	95.091	142346	2.56511	13.6706	0.934836	1.63768	1.65351	0.162444	1.36388	0.824841	970.345	12.2865	984.821	10.4246	1017.21	18.9357	1017.21	18.9357	95.3932
-PENN J-1 Spot 87	99.0149	50014.2	3.58431	13.6448	1.08915	1.7089	1.74231	0.169189	1.35992	0.780527	1007.64	12.6858	1011.87	11.1608	1021.03	22.0676	1021.03	22.0676	98.6883
-PENN J-1 Spot 150	201.346	110161	3.10487	13.6308	0.734892	1.78893	1.3268	0.176931	1.10468	0.832594	1050.19	10.7056	1041.44	8.64174	1023.1	14.8719	1023.1	14.8719	102.648
-PENN J-1 Spot 159	87.33	38747.6	1.99709	13.6115	0.9389	1.66313	1.38027	0.164255	1.01173	0.732998	980.381	9.20144	994.57	8.75262	1025.98	19.0115	1025.98	19.0115	95.5558
-PENN J-1 Spot 35	18.431	13820.7	2.46433	13.5791	1.35833	1.60711	1.97237	0.158346	1.4301	0.725066	947.577	12.6024	972.985	12.346	1030.79	27.4767	1030.79	27.4767	91.9274
-PENN J-1 Spot 192	188.759	59004.1	5.17921	13.5778	0.849149	1.7647	1.43569	0.173855	1.15765	0.806337	1033.32	11.0527	1032.57	9.3052	1030.99	17.1834	1030.99	17.1834	100.226
-PENN J-1 Spot 237	62.6143	9931.25	2.1872	13.5608	0.917859	1.62642	1.54089	0.160032	1.23768	0.80323	956.955	11.0069	980.476	9.68907	1033.51	18.5641	1033.51	18.5641	92.5927
-PENN J-1 Spot 4	153.712	61405.3	4.08867	13.5584	0.878585	1.73221	1.40734	0.17041	1.09941	0.781195	1014.37	10.3189	1020.57	9.05998	1033.87	17.7702	1033.87	17.7702	98.1139
-PENN J-1 Spot 252	38.7613	12658.5	0.862504	13.5551	1.29432	1.68586	1.72066	0.165811	1.13376	0.658908	988.99	10.395	1003.2	10.9668	1034.36	26.1679	1034.36	26.1679	95.6134
-PENN J-1 Spot 124	246.214	120584	3.39547	13.5511	0.827484	1.81836	1.52845	0.178789	1.28508	0.840774	1060.35	12.5648	1052.09	10.0133	1034.97	16.7345	1034.97	16.7345	102.453
-PENN J-1 Spot 297	124.436	138420	1.53536	13.5496	0.900974	1.7819	1.54325	0.175185	1.25295	0.811887	1040.62	12.0404	1038.87	10.0374	1035.19	18.2196	1035.19	18.2196	100.524
-PENN J-1 Spot 141	555.047	25724.8	3.99585	13.5442	0.937575	1.47072	2.19502	0.144535	1.9847	0.904186	870.254	16.1569	918.424	13.2678	1035.99	18.9572	1035.99	18.9572	84.0023
-PENN J-1 Spot 62	112.512	30818.5	4.52957	13.5435	1.0823	1.84324	1.67503	0.181134	1.27841	0.763219	1073.17	12.6384	1061.02	11.0265	1036.09	21.8798	1036.09	21.8798	103.579
-PENN J-1 Spot 298	276.016	67263	3.60178	13.5262	0.837579	1.7892	1.81018	0.175599	1.60474	0.886512	1042.89	15.4521	1041.53	11.791	1038.67	16.9295	1038.67	16.9295	100.405
-PENN J-1 Spot 272	192.253	80133.3	5.25541	13.5131	0.706362	1.69533	1.18984	0.166225	0.95748	0.804714	991.276	8.79754	1006.77	7.5992	1040.63	14.2764	1040.63	14.2764	95.257
-PENN J-1 Spot 209	257.192	59048.9	3.24419	13.5114	0.900815	1.70654	1.5292	0.167304	1.23571	0.808077	997.239	11.4171	1010.99	9.79059	1040.88	18.1997	1040.88	18.1997	95.8073
-PENN J-1 Spot 225	232.642	30188.2	3.82442	13.5092	0.864936	1.75998	1.36025	0.172515	1.04984	0.771799	1025.95	9.95744	1030.84	8.80765	1041.21	17.4751	1041.21	17.4751	98.5343
-PENN J-1 Spot 57	201.582	35636.5	0.461707	13.5068	0.997017	1.64982	1.7256	0.161687	1.40842	0.816192	966.148	12.6368	989.483	10.9096	1041.58	20.1395	1041.58	20.1395	92.7582
-PENN J-1 Spot 198	48.4908	15889.8	2.71857	13.4946	0.867038	1.75406	1.50455	0.171749	1.2296	0.817254	1021.74	11.6183	1028.66	9.73018	1043.43	17.5122	1043.43	17.5122	97.921
-PENN J-1 Spot 133	64.6999	20968.4	2.64159	13.4832	1.08886	1.71917	1.51055	0.16819	1.04697	0.693105	1002.13	9.71714	1015.71	9.69749	1045.13	21.9816	1045.13	21.9816	95.8854
-PENN J-1 Spot 283	168.135	19623.8	1.80649	13.4644	0.704701	1.80895	1.27236	0.176727	1.05938	0.832613	1049.07	10.2565	1048.7	8.32015	1047.95	14.2268	1047.95	14.2268	100.107
-PENN J-1 Spot 270	254.473	58456	3.01873	13.4551	1.07242	1.76513	1.58054	0.172327	1.16104	0.734585	1024.92	11.0019	1032.73	10.245	1049.34	21.6372	1049.34	21.6372	97.6726
-PENN J-1 Spot 299	327.591	113818	2.06341	13.4458	1.02385	1.80409	2.00905	0.176008	1.72859	0.860401	1045.13	16.6776	1046.94	13.1254	1050.74	20.652	1050.74	20.652	99.466
-PENN J-1 Spot 0	194.58	35150.1	1.8781	13.4444	0.728545	1.77336	1.39194	0.172992	1.18605	0.852086	1028.57	11.276	1035.75	9.0376	1050.95	14.7007	1050.95	14.7007	97.8706
-PENN J-1 Spot 108	144.72	203981	1.69641	13.4344	0.864849	1.82058	1.47678	0.177466	1.19704	0.810576	1053.12	11.6304	1052.89	9.67896	1052.45	17.445	1052.45	17.445	100.064
-PENN J-1 Spot 163	78.0235	14669.9	2.58327	13.4337	0.765644	1.75764	1.42448	0.171322	1.20122	0.843269	1019.39	11.326	1029.98	9.21912	1052.55	15.4445	1052.55	15.4445	96.8497
-PENN J-1 Spot 129	368.465	46736.7	2.74037	13.4285	0.904487	1.86505	1.56799	0.18172	1.28081	0.816853	1076.37	12.6968	1068.78	10.3644	1053.34	18.241	1053.34	18.241	102.186
-PENN J-1 Spot 118	239.02	6.29097e+06	1.97031	13.4087	0.860751	1.80838	1.42865	0.175939	1.14025	0.798126	1044.75	10.9975	1048.49	9.3412	1056.31	17.3513	1056.31	17.3513	98.9059
-PENN J-1 Spot 1	110.07	31700.7	7.11685	13.3916	0.911426	1.75561	1.45678	0.170587	1.13645	0.780109	1015.35	10.6761	1029.23	9.42426	1058.88	18.3517	1058.88	18.3517	95.8889
-PENN J-1 Spot 259	216.134	52156.6	1.51708	13.3873	0.843327	1.86451	1.51492	0.181111	1.25848	0.830726	1073.04	12.44	1068.59	10.0126	1059.52	16.9756	1059.52	16.9756	101.276
-PENN J-1 Spot 68	166.831	65981	4.85148	13.3779	0.914719	1.79256	1.63173	0.174001	1.35124	0.828099	1034.12	12.9102	1042.76	10.6357	1060.93	18.4056	1060.93	18.4056	97.4728
-PENN J-1 Spot 143	278.487	108662	2.28363	13.3726	1.06802	1.81495	1.81808	0.176104	1.47131	0.809267	1045.65	14.2019	1050.86	11.903	1061.73	21.4941	1061.73	21.4941	98.4863
-PENN J-1 Spot 75	90.724	209955	2.64708	13.352	0.819599	1.85507	1.37434	0.179719	1.10321	0.802718	1065.44	10.8341	1065.23	9.06732	1064.83	16.464	1064.83	16.464	100.057
-PENN J-1 Spot 278	34.2667	18903.7	1.71296	13.3499	1.11865	1.75312	1.67088	0.169815	1.24115	0.742813	1011.09	11.6145	1028.31	10.8038	1065.15	22.5053	1065.15	22.5053	94.9244
-PENN J-1 Spot 148	46.5221	6877.31	4.87461	13.3446	0.8928	1.8113	1.48449	0.175381	1.18601	0.798935	1041.69	11.4081	1049.55	9.71192	1065.95	17.9523	1065.95	17.9523	97.7239
-PENN J-1 Spot 310	44.1857	10779.7	2.15655	13.3414	1.10212	1.75246	1.51379	0.169643	1.03773	0.685517	1010.15	9.70255	1028.07	9.7867	1066.43	22.14	1066.43	22.14	94.722
-PENN J-1 Spot 121	33.1044	6295.17	1.64399	13.3229	1.38612	1.74057	1.9085	0.168258	1.31188	0.687391	1002.51	12.1801	1023.67	12.3082	1069.22	27.86	1069.22	27.86	93.7604
-PENN J-1 Spot 282	112.947	57920.8	2.66004	13.3201	0.95318	1.77209	1.52856	0.171269	1.19497	0.78176	1019.1	11.2641	1035.28	9.92213	1069.65	19.1363	1069.65	19.1363	95.2743
-PENN J-1 Spot 223	14.661	54646.7	1.19252	13.3183	1.87423	1.56636	2.3639	0.151366	1.44058	0.609408	908.617	12.2087	956.987	14.6508	1069.91	37.6657	1069.91	37.6657	84.9248
-PENN J-1 Spot 260	154.943	47349.6	1.43121	13.3133	1.02225	1.84265	1.34034	0.177998	0.866901	0.646775	1056.03	8.44422	1060.81	8.82219	1070.67	20.5395	1070.67	20.5395	98.6331
-PENN J-1 Spot 154	328.564	32934.4	15.5191	13.298	0.992368	1.73108	1.97526	0.167029	1.70788	0.864637	995.721	15.7575	1020.15	12.7134	1072.98	19.9322	1072.98	19.9322	92.7998
-PENN J-1 Spot 230	81.6008	23915.6	1.36573	13.2849	0.978055	1.79896	1.70639	0.173407	1.39827	0.819435	1030.86	13.3208	1045.08	11.1365	1074.96	19.6372	1074.96	19.6372	95.8973
-PENN J-1 Spot 60	476.382	128955	4.50535	13.2729	0.682922	1.82795	1.78215	0.176043	1.6461	0.923665	1045.32	15.8845	1055.55	11.6973	1076.74	13.691	1076.74	13.691	97.0824
-PENN J-1 Spot 122	173.484	49013.1	1.88178	13.2515	0.882723	1.87347	1.50181	0.180136	1.21501	0.809027	1067.72	11.9555	1071.76	9.94261	1079.99	17.7064	1079.99	17.7064	98.864
-PENN J-1 Spot 132	102.114	167046	1.8799	13.2505	0.733709	1.82879	1.09209	0.175826	0.808901	0.740694	1044.13	7.79749	1055.85	7.16898	1080.15	14.7109	1080.15	14.7109	96.6659
-PENN J-1 Spot 266	137.875	2.98185e+06	0.822909	13.2445	0.863081	1.87708	1.47831	0.180387	1.2002	0.811876	1069.09	11.8237	1073.03	9.79353	1081.03	17.297	1081.03	17.297	98.8952
-PENN J-1 Spot 176	197.254	78435.1	3.24046	13.2238	0.954993	1.90054	1.43448	0.182356	1.07039	0.746183	1079.83	10.6422	1081.28	9.54413	1084.17	19.1312	1084.17	19.1312	99.6001
-PENN J-1 Spot 73	900.558	779335	31.7312	13.2204	0.747056	1.90337	1.47661	0.182581	1.27369	0.862577	1081.06	12.6767	1082.27	9.82949	1084.7	14.9791	1084.7	14.9791	99.6639
-PENN J-1 Spot 49	49.4015	5781.99	1.88098	13.2173	1.11566	1.85983	1.56659	0.178362	1.09977	0.702018	1058.02	10.7311	1066.93	10.345	1085.16	22.3499	1085.16	22.3499	97.499
-PENN J-1 Spot 234	207.751	353368	1.10318	13.1441	0.86609	1.88819	1.62963	0.18008	1.38043	0.847081	1067.41	13.5796	1076.95	10.8182	1096.32	17.3546	1096.32	17.3546	97.3631
-PENN J-1 Spot 66	39.7941	82452.8	94.0844	13.1319	1.22302	1.72752	1.87195	0.164602	1.41719	0.757066	982.302	12.9124	1018.83	12.0393	1098.16	24.4617	1098.16	24.4617	89.4501
-PENN J-1 Spot 211	24.5305	67620.6	1.11497	13.1145	1.4394	1.87934	1.81718	0.178832	1.10918	0.610384	1060.59	10.8471	1073.83	12.0437	1100.81	28.7921	1100.81	28.7921	96.3464
-PENN J-1 Spot 71	43.8005	23145.7	1.93398	13.0732	1.39693	1.75706	2.05842	0.16667	1.51185	0.734471	993.736	13.9231	1029.76	13.3207	1107.09	27.9352	1107.09	27.9352	89.7607
-PENN J-1 Spot 91	279.813	87362.1	1.21929	13.069	0.937116	2.01088	1.42763	0.190685	1.07701	0.754403	1125.08	11.1188	1119.19	9.68173	1107.74	18.7354	1107.74	18.7354	101.565
-PENN J-1 Spot 105	804.701	18208.7	0.588186	13.0176	0.831013	1.85537	1.93211	0.175247	1.74426	0.902778	1040.96	16.7669	1065.34	12.7483	1115.64	16.587	1115.64	16.587	93.3057
-PENN J-1 Spot 139	43.3387	160208	1.25369	13.0078	1.26764	1.86184	1.96793	0.175725	1.50527	0.764902	1043.58	14.5032	1067.64	13.0005	1117.15	25.2962	1117.15	25.2962	93.4148
-PENN J-1 Spot 215	176.293	104359	3.19004	12.9737	1.0039	2.03859	1.8263	0.191903	1.52563	0.835369	1131.67	15.8347	1128.49	12.4417	1122.35	20.009	1122.35	20.009	100.83
-PENN J-1 Spot 314	48.0155	21212.9	2.08859	12.9634	1.15758	1.96329	1.70878	0.184669	1.25696	0.735587	1092.43	12.6309	1103.01	11.496	1123.94	23.0785	1123.94	23.0785	97.1962
-PENN J-1 Spot 98	44.8617	27517.3	1.08292	12.9627	1.02832	1.83201	1.70823	0.172309	1.36405	0.798513	1024.82	12.9245	1057	11.2209	1124.08	20.4929	1124.08	20.4929	91.1699
-PENN J-1 Spot 167	136.629	24458	2.38301	12.9531	0.757518	2.1034	1.36595	0.197689	1.13666	0.832136	1162.9	12.0945	1149.92	9.40075	1125.56	15.1026	1125.56	15.1026	103.317
-PENN J-1 Spot 180	43.7491	14847	1.34251	12.9498	0.922938	1.85528	1.43453	0.174325	1.09821	0.765555	1035.9	10.5094	1065.31	9.46485	1126.06	18.4017	1126.06	18.4017	91.9934
-PENN J-1 Spot 312	28.7284	152600	0.906412	12.9152	1.26232	1.89773	1.68906	0.177837	1.12226	0.664428	1055.15	10.9232	1080.29	11.2323	1131.36	25.1367	1131.36	25.1367	93.2638
-PENN J-1 Spot 43	572.385	104561	2.0224	12.8877	0.922238	2.05566	1.72051	0.192227	1.45246	0.844202	1133.43	15.0966	1134.18	11.7531	1135.63	18.3339	1135.63	18.3339	99.8062
-PENN J-1 Spot 74	446.98	71552.4	3.07483	12.8826	0.885886	2.04178	1.93225	0.190853	1.71721	0.888708	1126	17.7412	1129.56	13.1704	1136.42	17.6082	1136.42	17.6082	99.0822
-PENN J-1 Spot 162	238.529	61588.4	3.28201	12.8512	0.873904	1.95166	1.22854	0.181985	0.863482	0.702852	1077.81	8.5703	1099.02	8.24833	1141.25	17.3772	1141.25	17.3772	94.4416
-PENN J-1 Spot 236	361.051	264839	3.91789	12.8157	0.868489	2.08672	1.73209	0.194041	1.49862	0.86521	1143.23	15.6995	1144.45	11.8902	1146.77	17.2489	1146.77	17.2489	99.691
-PENN J-1 Spot 136	183.531	95774.9	2.511	12.8144	0.67924	2.06995	1.21778	0.192462	1.01075	0.829996	1134.7	10.5163	1138.92	8.33751	1146.96	13.4941	1146.96	13.4941	98.9312
-PENN J-1 Spot 103	221.878	54524.2	4.36661	12.7956	0.796817	2.05154	1.41468	0.190471	1.16893	0.826287	1123.93	12.0564	1132.81	9.65745	1149.85	15.8058	1149.85	15.8058	97.7454
-PENN J-1 Spot 261	43.8298	21796.1	3.50797	12.7533	1.00264	1.99221	1.68651	0.18435	1.35611	0.804094	1090.7	13.6075	1112.87	11.402	1156.43	19.8946	1156.43	19.8946	94.3157
-PENN J-1 Spot 27	314.825	457272	2.72405	12.7278	0.825606	2.09364	1.76134	0.19335	1.55586	0.883337	1139.5	16.2504	1146.72	12.1039	1160.39	16.3724	1160.39	16.3724	98.1991
-PENN J-1 Spot 313	322.303	241052	5.43073	12.7103	0.926844	2.13565	1.60586	0.196958	1.31139	0.816628	1158.96	13.9106	1160.42	11.106	1163.13	18.3706	1163.13	18.3706	99.6418
-PENN J-1 Spot 228	414.841	1.98936e+06	1.97342	12.6844	0.839943	2.18386	1.80267	0.200994	1.59503	0.884814	1180.66	17.208	1175.91	12.5556	1167.16	16.6557	1167.16	16.6557	101.157
-PENN J-1 Spot 88	294.733	59660	1.73131	12.6676	0.921046	2.16372	2.14207	0.198876	1.93394	0.902839	1169.28	20.681	1169.47	14.8764	1169.83	18.2422	1169.83	18.2422	99.953
-PENN J-1 Spot 284	192.318	43798.7	3.40641	12.6152	0.851771	2.15572	1.41767	0.19732	1.13326	0.79938	1160.91	12.0395	1166.89	9.83358	1178.03	16.8634	1178.03	16.8634	98.5464
-PENN J-1 Spot 22	61.1687	32656.6	1.61905	12.5993	1.13251	1.88488	1.73645	0.172312	1.31631	0.758046	1024.84	12.4724	1075.78	11.5203	1180.53	22.3893	1180.53	22.3893	86.8118
-PENN J-1 Spot 137	184.914	202104	4.34773	12.5685	0.912098	2.13469	1.41323	0.194674	1.07949	0.763845	1146.64	11.3395	1160.11	9.77229	1185.35	18.0197	1185.35	18.0197	96.7342
-PENN J-1 Spot 279	328.678	55661.8	1.18705	12.4963	0.922542	2.1233	1.69602	0.192522	1.42317	0.839121	1135.02	14.8112	1156.41	11.7079	1196.72	18.1868	1196.72	18.1868	94.8443
-PENN J-1 Spot 93	89.3518	53929.6	1.28963	12.4584	0.838688	1.94404	1.43553	0.175733	1.16505	0.811584	1043.62	11.2256	1096.39	9.62536	1202.69	16.5091	1202.69	16.5091	86.7741
-PENN J-1 Spot 6	264.517	51920.6	2.51566	12.4474	0.94256	2.32964	1.38886	0.210405	1.02006	0.734456	1230.97	11.4306	1221.37	9.86721	1204.46	18.5518	1204.46	18.5518	102.201
-PENN J-1 Spot 116	253.345	95988.6	4.67421	12.4339	0.669992	2.27374	1.6471	0.205133	1.50468	0.91353	1202.84	16.5106	1204.18	11.6162	1206.56	13.1959	1206.56	13.1959	99.6914
-PENN J-1 Spot 307	111.504	27730.2	2.56436	12.4239	0.904616	2.16494	1.31921	0.19516	0.960197	0.727859	1149.27	10.1075	1169.86	9.16294	1208.16	17.7939	1208.16	17.7939	95.1254
-PENN J-1 Spot 188	428.231	37082	3.7647	12.3804	1.04598	2.17953	1.92931	0.195787	1.62116	0.840279	1152.65	17.1109	1174.53	13.4294	1215.05	20.5757	1215.05	20.5757	94.8638
-PENN J-1 Spot 47	173.357	419773	1.85852	12.3726	0.898266	2.28546	1.36597	0.205174	1.02907	0.753364	1203.05	11.2937	1207.8	9.64853	1216.33	17.6793	1216.33	17.6793	98.9088
-PENN J-1 Spot 92	74.5055	28104.8	3.14767	12.3638	0.88476	2.12554	1.35829	0.190681	1.0306	0.758752	1125.06	10.6395	1157.14	9.37946	1217.69	17.4152	1217.69	17.4152	92.393
-PENN J-1 Spot 247	479.561	572736	14.0816	12.3105	0.819244	2.43186	1.66897	0.21722	1.45406	0.871233	1267.17	16.7275	1252.07	12.009	1226.18	16.0813	1226.18	16.0813	103.342
-PENN J-1 Spot 18	131.111	147799	4.96889	12.2992	0.862542	2.25612	1.4353	0.201338	1.14721	0.799287	1182.5	12.3943	1198.7	10.0983	1228.02	16.9318	1228.02	16.9318	96.2937
-PENN J-1 Spot 110	420.655	12980.2	3.04945	12.2099	1.0859	2.18493	2.21336	0.19357	1.92868	0.871379	1140.69	20.1637	1176.25	15.4189	1242.27	21.2778	1242.27	21.2778	91.8231
-PENN J-1 Spot 5	469.137	78578.6	3.30066	12.1648	0.755291	2.28369	1.69188	0.201572	1.51393	0.894823	1183.76	16.3722	1207.26	11.948	1249.52	14.7838	1249.52	14.7838	94.7367
-PENN J-1 Spot 204	78.5734	36279.2	2.90318	12.093	1.04334	2.37196	1.5821	0.208128	1.18932	0.751735	1218.84	13.2079	1234.19	11.3007	1261.09	20.3706	1261.09	20.3706	96.6492
-PENN J-1 Spot 306	207.298	924055	3.93229	12.0791	0.743253	2.50604	1.52912	0.219639	1.33633	0.873922	1279.97	15.5136	1273.79	11.0984	1263.35	14.5059	1263.35	14.5059	101.315
-PENN J-1 Spot 72	74.5553	22632.2	1.8444	12.0223	0.784109	2.42655	1.42238	0.211673	1.18673	0.834329	1237.73	13.3645	1250.5	10.228	1272.54	15.2902	1272.54	15.2902	97.2643
-PENN J-1 Spot 128	76.083	5475.53	2.71296	12.0134	1.97256	2.13608	2.32427	0.186197	1.22932	0.528906	1100.74	12.4394	1160.56	16.0762	1273.99	38.4609	1273.99	38.4609	86.4011
-PENN J-1 Spot 303	216.624	8657.82	1.68444	11.9985	0.883807	2.16816	1.66673	0.188759	1.41311	0.847833	1114.65	14.4647	1170.89	11.5824	1276.41	17.2336	1276.41	17.2336	87.327
-PENN J-1 Spot 242	101.867	22964.1	3.69267	11.9898	0.982487	2.3365	1.55486	0.203266	1.20511	0.775064	1192.84	13.1235	1223.46	11.0564	1277.83	19.1419	1277.83	19.1419	93.349
-PENN J-1 Spot 271	169.397	25524.3	2.91559	11.9001	0.800443	2.62448	1.38075	0.226611	1.12506	0.814818	1316.71	13.3989	1307.52	10.1521	1292.45	15.5727	1292.45	15.5727	101.878
-PENN J-1 Spot 218	21.2726	33682.1	1.1735	11.7821	1.20826	2.35817	1.76755	0.201598	1.29009	0.729877	1183.9	13.953	1230.03	12.6036	1311.81	23.4426	1311.81	23.4426	90.2493
-PENN J-1 Spot 94	276.549	45652.7	4.55053	11.5492	0.90431	2.79527	1.38627	0.23424	1.05071	0.757934	1356.68	12.8547	1354.27	10.3675	1350.45	17.4512	1350.45	17.4512	100.462
-PENN J-1 Spot 205	135.225	156309	2.11162	11.5287	1.00733	2.60132	1.37259	0.217602	0.932359	0.679267	1269.19	10.7414	1301.01	10.0674	1353.87	19.4301	1353.87	19.4301	93.7456
-PENN J-1 Spot 304	36.6634	6894.73	1.37484	11.4983	1.36257	2.59685	1.902	0.216656	1.32703	0.697701	1264.18	15.2336	1299.75	13.9442	1358.95	26.2634	1358.95	26.2634	93.0261
-PENN J-1 Spot 153	215.207	55665.2	3.04099	11.4884	0.787272	2.76944	1.53025	0.230856	1.3122	0.857507	1338.98	15.8654	1347.34	11.4163	1360.61	15.1705	1360.61	15.1705	98.4102
-PENN J-1 Spot 301	107.229	17500.3	3.2317	11.4039	1.11883	2.88169	1.76382	0.238445	1.36356	0.773071	1378.61	16.9241	1377.13	13.2965	1374.83	21.5175	1374.83	21.5175	100.275
-PENN J-1 Spot 19	338.182	44902.4	2.79635	11.3916	0.779817	2.99688	1.66175	0.24771	1.46741	0.883052	1426.65	18.7803	1406.83	12.6522	1376.9	14.9922	1376.9	14.9922	103.614
-PENN J-1 Spot 175	431.587	68138.1	1.95165	11.3749	0.859585	2.99361	1.64421	0.247075	1.40162	0.852459	1423.37	17.9014	1406	12.5152	1379.73	16.5194	1379.73	16.5194	103.163
-PENN J-1 Spot 274	303.23	494534	6.65951	11.3629	1.0307	2.82129	1.78922	0.232608	1.46252	0.817408	1348.16	17.7919	1361.21	13.414	1381.75	19.8025	1381.75	19.8025	97.5685
-PENN J-1 Spot 179	175.588	83156.2	4.50324	11.3528	0.88182	2.85563	1.50163	0.23523	1.21544	0.809412	1361.85	14.9209	1370.29	11.2932	1383.47	16.9381	1383.47	16.9381	98.4376
-PENN J-1 Spot 81	78.3881	35785.6	3.08676	11.3331	1.14064	2.71337	1.66599	0.223124	1.21427	0.728862	1298.36	14.2794	1332.12	12.3613	1386.79	21.8997	1386.79	21.8997	93.6231
-PENN J-1 Spot 78	105.64	26775.8	1.9308	11.3145	1.06349	2.78081	1.78184	0.228294	1.42966	0.802352	1325.55	17.1296	1350.4	13.3079	1389.95	20.4098	1389.95	20.4098	95.3671
-PENN J-1 Spot 7	194.894	47373.9	1.50943	11.3083	0.805296	2.96265	1.39999	0.243089	1.1452	0.818003	1402.73	14.4365	1398.09	10.6284	1391.01	15.4522	1391.01	15.4522	100.843
-PENN J-1 Spot 70	149.402	42999.7	2.85101	11.2752	0.75446	2.88101	1.43636	0.235698	1.22226	0.850943	1364.29	15.0289	1376.96	10.827	1396.63	14.4656	1396.63	14.4656	97.6847
-PENN J-1 Spot 34	348.291	50166.2	2.87925	11.2253	0.993695	2.85431	2.05864	0.23248	1.80293	0.875789	1347.49	21.9233	1369.95	15.481	1405.12	19.0308	1405.12	19.0308	95.898
-PENN J-1 Spot 232	145.868	19916.4	1.83985	11.2131	0.8784	2.7503	1.56958	0.223765	1.30076	0.828735	1301.74	15.3325	1342.17	11.6881	1407.21	16.8178	1407.21	16.8178	92.5052
-PENN J-1 Spot 158	153.193	96427.6	2.52561	11.168	0.789815	2.9421	1.426	0.238407	1.18729	0.832604	1378.41	14.7344	1392.82	10.8067	1414.93	15.1059	1414.93	15.1059	97.4192
-PENN J-1 Spot 245	77.6494	71421.4	2.14487	11.1146	0.963649	2.8274	1.69421	0.228018	1.39346	0.822483	1324.1	16.6792	1362.83	12.7087	1424.08	18.4079	1424.08	18.4079	92.9796
-PENN J-1 Spot 210	290.549	432355	3.29988	10.9791	0.908701	3.21007	1.57285	0.255722	1.28379	0.816219	1467.92	16.8534	1459.59	12.1776	1447.48	17.3034	1447.48	17.3034	101.412
-PENN J-1 Spot 217	306.404	62689.5	5.90525	10.9354	0.763258	3.16166	1.35403	0.250863	1.11841	0.825984	1442.93	14.4592	1447.85	10.4453	1455.07	14.5189	1455.07	14.5189	99.1656
-PENN J-1 Spot 109	288.745	150263	3.30102	10.8821	0.64702	3.33024	1.34245	0.262952	1.17624	0.876188	1504.93	15.7872	1488.17	10.4835	1464.35	12.2924	1464.35	12.2924	102.771
-PENN J-1 Spot 286	77.8652	22070.7	1.7391	10.8547	1.15275	3.25616	1.82621	0.256454	1.41641	0.7756	1471.67	18.6368	1470.65	14.1872	1469.15	21.8868	1469.15	21.8868	100.172
-PENN J-1 Spot 244	827.399	13170.3	2.24989	10.8273	0.637357	2.95939	1.55364	0.232494	1.41689	0.91198	1347.56	17.2299	1397.26	11.7916	1473.93	12.0932	1473.93	12.0932	91.4262
-PENN J-1 Spot 190	154.375	1.34454e+06	3.8495	10.8028	0.972862	2.99048	1.52523	0.234403	1.17467	0.770163	1357.54	14.3795	1405.2	11.6065	1478.24	18.4487	1478.24	18.4487	91.8345
-PENN J-1 Spot 258	69.7861	16483.4	2.14848	10.7977	0.82171	3.2391	1.62985	0.253772	1.40755	0.863608	1457.9	18.3657	1466.57	12.6459	1479.13	15.5804	1479.13	15.5804	98.5649
-PENN J-1 Spot 276	149.869	176787	4.44081	10.7905	0.838088	3.14642	1.58768	0.246348	1.34846	0.849326	1419.61	17.1817	1444.12	12.2337	1480.39	15.8882	1480.39	15.8882	95.8947
-PENN J-1 Spot 214	263.417	188686	3.62496	10.7849	0.850439	3.39286	1.33733	0.265502	1.03209	0.771754	1517.93	13.9587	1502.75	10.4883	1481.39	16.1202	1481.39	16.1202	102.467
-PENN J-1 Spot 267	259.164	67247.8	1.13913	10.7535	0.759346	3.33525	1.29941	0.260236	1.05444	0.811481	1491.05	14.0365	1489.34	10.1509	1486.9	14.3829	1486.9	14.3829	100.279
-PENN J-1 Spot 125	333.776	51387.5	2.02426	10.7394	0.82295	3.28357	1.79366	0.255866	1.59373	0.888535	1468.66	20.9317	1477.17	13.9617	1489.39	15.5825	1489.39	15.5825	98.608
-PENN J-1 Spot 29	383.6	246865	0.838466	10.6859	0.749271	3.33747	1.66041	0.258771	1.48174	0.892394	1483.55	19.6363	1489.86	12.9733	1498.84	14.1694	1498.84	14.1694	98.9803
-PENN J-1 Spot 50	107.784	55881.3	1.74201	10.6614	0.951523	3.49266	1.4658	0.270183	1.11498	0.760661	1541.73	15.2889	1525.56	11.5711	1503.18	17.9824	1503.18	17.9824	102.565
-PENN J-1 Spot 17	200.998	194497	2.45047	10.6609	0.791802	3.51465	1.43801	0.271872	1.20039	0.834754	1550.3	16.541	1530.51	11.3676	1503.26	14.9649	1503.26	14.9649	103.129
-PENN J-1 Spot 82	138.361	871281	2.34695	10.6586	0.711692	3.31302	1.42872	0.256219	1.23884	0.8671	1470.47	16.2884	1484.12	11.1439	1503.68	13.4501	1503.68	13.4501	97.7913
-PENN J-1 Spot 246	216.58	47227.4	1.99688	10.6563	0.864628	3.34325	1.5645	0.258501	1.30387	0.83341	1482.17	17.2648	1491.21	12.2287	1504.08	16.3396	1504.08	16.3396	98.5431
-PENN J-1 Spot 263	150.526	192812	2.65055	10.6308	0.723917	3.37843	1.23806	0.260597	1.00436	0.811236	1492.89	13.3845	1499.41	9.70022	1508.6	13.6706	1508.6	13.6706	98.9587
-PENN J-1 Spot 58	655.754	60136.8	4.83828	10.5505	1.08006	3.04948	2.10021	0.233447	1.80121	0.857633	1352.54	21.9762	1420.1	16.0604	1522.9	20.3585	1522.9	20.3585	88.8134
-PENN J-1 Spot 222	159.37	67698.5	3.93963	10.5501	0.820383	3.45642	1.56012	0.264589	1.32701	0.850579	1513.28	17.8984	1517.33	12.2871	1522.98	15.463	1522.98	15.463	99.3628
-PENN J-1 Spot 256	238.251	1963.84	0.889918	10.5178	2.13565	0.917908	2.87178	0.0700504	1.91993	0.66855	436.459	8.10232	661.253	13.9566	1528.77	40.2294	1528.77	40.2294	28.5498
-PENN J-1 Spot 134	112.478	25836.2	3.41817	10.5167	0.899242	3.31329	1.38676	0.252829	1.05568	0.761257	1453.05	13.7336	1484.19	10.8168	1528.95	16.9362	1528.95	16.9362	95.0356
-PENN J-1 Spot 126	141.264	81541	7.94257	10.5096	0.789477	3.57045	1.26609	0.272267	0.989799	0.781778	1552.3	13.6547	1542.99	10.0432	1530.23	14.8661	1530.23	14.8661	101.442
-PENN J-1 Spot 184	232.859	85639.6	2.65247	10.4717	0.862296	3.42466	1.48711	0.26021	1.21159	0.814726	1490.91	16.127	1510.07	11.6877	1537.02	16.223	1537.02	16.223	97
-PENN J-1 Spot 117	265.003	55141.8	2.72927	10.3545	0.863599	3.79895	1.28651	0.285417	0.953577	0.741211	1618.58	13.6493	1592.52	10.3413	1558.18	16.2038	1558.18	16.2038	103.876
-PENN J-1 Spot 46	1009.73	8439.09	25.7999	10.1807	0.702572	3.23178	1.4168	0.238731	1.23033	0.868387	1380.1	15.2852	1464.81	10.9869	1589.86	13.1279	1589.86	13.1279	86.8061
-PENN J-1 Spot 123	79.1573	8681.3	1.19257	10.1767	1.28619	3.60895	1.82677	0.266488	1.29722	0.710119	1522.95	17.5958	1551.51	14.5252	1590.6	24.0299	1590.6	24.0299	95.747
-PENN J-1 Spot 165	343.794	6307.6	3.89836	10.1674	0.978907	2.98511	1.83036	0.22022	1.5466	0.844969	1283.04	17.9935	1403.83	13.9224	1592.31	18.2841	1592.31	18.2841	80.5769
-PENN J-1 Spot 144	298.226	7.96354e+06	1.82666	10.1555	0.781469	3.92567	1.53752	0.28927	1.32411	0.8612	1637.88	19.1515	1618.99	12.4429	1594.5	14.5934	1594.5	14.5934	102.721
-PENN J-1 Spot 202	328.534	670614	12.1041	10.106	0.801095	3.9502	1.94373	0.289658	1.77097	0.911119	1639.82	25.6414	1624.03	15.7506	1603.62	14.9421	1603.62	14.9421	102.257
-PENN J-1 Spot 51	330.527	340408	6.67012	10.0718	0.67127	3.97879	1.86236	0.290769	1.73718	0.932782	1645.37	25.2269	1629.88	15.1131	1609.93	12.5086	1609.93	12.5086	102.201
-PENN J-1 Spot 10	119.856	44709.6	2.34077	10.0497	0.910405	3.97729	1.50538	0.29002	1.19889	0.796403	1641.63	17.3752	1629.57	12.215	1614.03	16.9566	1614.03	16.9566	101.71
-PENN J-1 Spot 241	157.742	2.06245e+07	2.25124	9.98783	0.838689	4.0827	1.58062	0.295874	1.33976	0.847618	1670.81	19.7193	1650.85	12.8924	1625.52	15.5975	1625.52	15.5975	102.786
-PENN J-1 Spot 171	652.403	17034.9	0.765133	9.9538	1.21775	3.55703	2.271	0.2569	1.9169	0.844079	1473.96	25.2572	1540	18.0011	1631.87	22.6298	1631.87	22.6298	90.3238
-PENN J-1 Spot 25	152.541	48156.3	3.75036	9.94586	1.07241	3.95386	1.62184	0.285333	1.21667	0.750181	1618.16	17.4112	1624.78	13.1443	1633.35	19.9247	1633.35	19.9247	99.0702
-PENN J-1 Spot 195	476.554	276717	1.72568	9.93386	0.733444	4.12135	1.67146	0.297061	1.50194	0.898582	1676.72	22.1747	1658.54	13.6586	1635.59	13.6239	1635.59	13.6239	102.514
-PENN J-1 Spot 52	199.956	128830	1.18173	9.92909	0.817774	4.05409	1.5577	0.292072	1.32578	0.85111	1651.88	19.3194	1645.12	12.6878	1636.48	15.187	1636.48	15.187	100.941
-PENN J-1 Spot 41	512.603	99516	2.31165	9.91117	0.916383	3.93243	1.84341	0.282796	1.5995	0.867686	1605.43	22.7311	1620.38	14.9239	1639.84	17.0129	1639.84	17.0129	97.9017
-PENN J-1 Spot 3	375.095	5.78401e+06	3.26157	9.89935	0.8483	4.23816	1.99214	0.304419	1.8025	0.904807	1713.19	27.1176	1681.44	16.3677	1642.05	15.7444	1642.05	15.7444	104.332
-PENN J-1 Spot 191	650.574	3.18765e+06	18.517	9.89784	0.800146	3.86572	1.62726	0.277625	1.41695	0.870758	1579.39	19.8486	1606.55	13.1279	1642.33	14.8501	1642.33	14.8501	96.1673
-PENN J-1 Spot 38	195.717	32212.6	1.47464	9.89417	1.09922	3.7721	1.59683	0.270801	1.15826	0.725354	1544.87	15.9111	1586.83	12.8169	1643.02	20.3991	1643.02	20.3991	94.0258
-PENN J-1 Spot 101	98.5107	66687.5	2.35205	9.87893	0.814611	3.91222	1.31099	0.280428	1.02719	0.783517	1593.52	14.5022	1616.21	10.6021	1645.88	15.1116	1645.88	15.1116	96.8182
-PENN J-1 Spot 86	91.6017	66010.2	3.32304	9.87877	0.980457	3.91589	1.57512	0.280686	1.23276	0.782648	1594.82	17.4172	1616.97	12.7407	1645.91	18.1866	1645.91	18.1866	96.8956
-PENN J-1 Spot 185	192.322	348028	2.48539	9.85985	0.840161	4.09439	1.68991	0.292919	1.46626	0.867657	1656.1	21.4145	1653.19	13.7917	1649.47	15.5767	1649.47	15.5767	100.402
-PENN J-1 Spot 11	1032.32	8981.9	1.69137	9.84257	1.36465	3.33139	2.00731	0.237915	1.47208	0.733359	1375.85	18.2382	1488.44	15.6775	1652.72	25.2923	1652.72	25.2923	83.2475
-PENN J-1 Spot 161	45.937	19093.8	1.31959	9.83501	1.06453	4.12807	1.69714	0.294584	1.32176	0.778818	1664.4	19.3889	1659.88	13.8729	1654.15	19.7255	1654.15	19.7255	100.62
-PENN J-1 Spot 21	47.4267	14935.2	1.26388	9.83354	0.944027	3.83635	1.38882	0.273726	1.01864	0.733459	1559.69	14.1117	1600.41	11.1865	1654.42	17.4917	1654.42	17.4917	94.2738
-PENN J-1 Spot 97	172.883	219004	2.56788	9.82324	0.825534	3.94771	1.31733	0.281377	1.02657	0.779283	1598.29	14.5318	1623.52	10.6729	1656.36	15.292	1656.36	15.292	96.4939
-PENN J-1 Spot 277	179.588	167165	1.39477	9.82006	0.87153	3.95385	1.59643	0.281722	1.33754	0.837833	1600.03	18.9519	1624.78	12.9384	1656.96	16.143	1656.96	16.143	96.564
-PENN J-1 Spot 197	178.081	37782	1.36544	9.80119	0.8948	3.95576	1.63731	0.281317	1.37117	0.837454	1597.99	19.4067	1625.17	13.271	1660.53	16.5665	1660.53	16.5665	96.2341
-PENN J-1 Spot 289	174.43	53911.3	1.69717	9.79754	0.999374	3.93841	1.57236	0.279979	1.21391	0.772028	1591.26	17.117	1621.61	12.7332	1661.21	18.5013	1661.21	18.5013	95.7888
-PENN J-1 Spot 157	278.894	276912	2.31543	9.78298	0.764568	4.2106	1.69281	0.298884	1.51032	0.892193	1685.77	22.4038	1676.09	13.8907	1663.96	14.1488	1663.96	14.1488	101.311
-PENN J-1 Spot 300	382.161	154379	2.26226	9.76968	0.679179	4.32204	1.77136	0.306378	1.63598	0.923573	1722.86	24.7335	1697.58	14.6075	1666.48	12.5644	1666.48	12.5644	103.383
-PENN J-1 Spot 76	521.071	81702.1	3.07079	9.75758	0.788865	4.04731	1.78041	0.286547	1.59611	0.896482	1624.25	22.9167	1643.76	14.4973	1668.77	14.5896	1668.77	14.5896	97.332
-PENN J-1 Spot 208	112.949	150463	2.15925	9.74308	0.878882	4.13039	1.6096	0.291995	1.34847	0.837768	1651.49	19.646	1660.34	13.1587	1671.53	16.2489	1671.53	16.2489	98.8013
-PENN J-1 Spot 120	185.743	24148.6	4.29071	9.73506	0.932144	3.97986	1.37239	0.281121	1.00725	0.733941	1597.01	14.2482	1630.1	11.1372	1673.05	17.2305	1673.05	17.2305	95.455
-PENN J-1 Spot 166	162.455	63339.1	2.26935	9.68251	0.800091	4.15182	1.49885	0.291685	1.26743	0.845607	1649.94	18.4503	1664.57	12.2655	1683.05	14.7721	1683.05	14.7721	98.0331
-PENN J-1 Spot 151	254.656	495884	1.3506	9.61442	0.757951	4.27968	1.73959	0.298553	1.56579	0.900089	1684.13	23.2068	1689.46	14.3189	1696.06	13.9692	1696.06	13.9692	99.2964
-PENN J-1 Spot 100	313.028	245096	4.9058	9.58633	0.928041	4.27782	1.79642	0.297552	1.53813	0.856223	1679.16	22.738	1689.1	14.7855	1701.46	17.0929	1701.46	17.0929	98.6894
-PENN J-1 Spot 30	82.8467	28479.2	1.81737	9.57885	0.974575	4.18751	1.64931	0.291043	1.33058	0.806746	1646.74	19.3364	1671.58	13.5193	1702.89	17.9468	1702.89	17.9468	96.7024
-PENN J-1 Spot 16	425.069	130114	5.40446	9.54558	0.818556	4.41086	1.60853	0.305501	1.38468	0.860836	1718.53	20.8885	1714.38	13.315	1709.3	15.0612	1709.3	15.0612	100.54
-PENN J-1 Spot 79	177.99	224884	3.30397	9.51749	0.914438	4.38268	1.45155	0.302656	1.1273	0.776618	1704.47	16.8842	1709.08	12.0012	1714.72	16.8142	1714.72	16.8142	99.4023
-PENN J-1 Spot 61	255.798	107189	2.56848	9.46234	0.807819	4.63495	1.40142	0.318223	1.14517	0.817149	1781.04	17.821	1755.59	11.7051	1725.4	14.8353	1725.4	14.8353	103.225
-PENN J-1 Spot 311	317.332	996066	5.66268	9.45518	0.856794	4.67248	1.83308	0.320557	1.62053	0.884043	1792.45	25.3585	1762.33	15.3327	1726.79	15.7302	1726.79	15.7302	103.802
-PENN J-1 Spot 146	164.312	4218.65	0.995763	9.41878	1.43904	3.63586	1.77534	0.248479	1.03971	0.585638	1430.63	13.3395	1557.42	14.1389	1733.87	26.3987	1733.87	26.3987	82.5109
-PENN J-1 Spot 281	549.219	58650.7	3.5943	9.35557	0.937574	4.41676	1.93299	0.299821	1.69038	0.874493	1690.42	25.1353	1715.49	16.0051	1746.2	17.1718	1746.2	17.1718	96.8054
-PENN J-1 Spot 183	312.173	8.58569e+07	2.73946	9.28532	0.782862	4.66329	2.10656	0.314179	1.95569	0.928381	1761.24	30.1401	1760.68	17.6146	1760	14.315	1760	14.315	100.07
-PENN J-1 Spot 287	97.2236	193230	1.87021	9.27547	0.748415	4.52162	1.35043	0.304311	1.12407	0.83238	1712.65	16.9063	1734.96	11.2292	1761.94	13.6818	1761.94	13.6818	97.2026
-PENN J-1 Spot 178	139.447	565795	1.09405	9.26328	0.754261	4.60625	1.39884	0.309599	1.17807	0.842175	1738.73	17.9536	1750.4	11.6706	1764.34	13.7845	1764.34	13.7845	98.5485
-PENN J-1 Spot 119	553.463	290409	4.35143	9.24395	0.932502	4.70599	1.73632	0.315643	1.46466	0.843545	1768.42	22.6525	1768.31	14.5415	1768.16	17.0323	1768.16	17.0323	100.015
-PENN J-1 Spot 280	119.126	123851	4.86712	9.21411	0.854659	4.51274	1.54357	0.301704	1.28537	0.832723	1699.76	19.2051	1733.32	12.8308	1774.06	15.5988	1774.06	15.5988	95.8114
-PENN J-1 Spot 255	731.125	176385	21.5572	9.19004	0.848619	4.57575	2.0155	0.305118	1.82813	0.907039	1716.64	27.5515	1744.86	16.7962	1778.84	15.4794	1778.84	15.4794	96.5032
-PENN J-1 Spot 229	73.8932	95779.2	2.88006	9.11719	0.805645	4.59729	1.49935	0.304124	1.26451	0.843373	1711.73	19.0097	1748.78	12.5049	1793.34	14.6692	1793.34	14.6692	95.4492
-PENN J-1 Spot 172	368.705	84507.1	1.54902	9.02881	0.708624	4.80392	1.8154	0.314712	1.67139	0.920671	1763.85	25.7918	1785.58	15.2584	1811.06	12.8743	1811.06	12.8743	97.3936
-PENN J-1 Spot 31	328.59	9543.33	3.23665	8.97648	2.2049	4.44565	2.87386	0.289554	1.84322	0.641376	1639.3	26.6802	1720.89	23.8265	1821.61	40.0135	1821.61	40.0135	89.9917
-PENN J-1 Spot 114	212.369	156300	1.93243	8.9279	1.01651	5.04255	1.75993	0.326654	1.43669	0.816331	1822.14	22.804	1826.5	14.9137	1831.45	18.423	1831.45	18.423	99.4916
-PENN J-1 Spot 254	221.845	1362.8	3.61343	8.90371	3.39053	1.21938	3.67301	0.0787767	1.41256	0.384578	488.817	6.64954	809.492	20.4936	1836.37	61.4281	1836.37	61.4281	26.6187
-PENN J-1 Spot 111	427.153	337582	7.56023	8.89052	0.915541	5.29533	1.89525	0.341592	1.65944	0.875581	1894.32	27.2377	1868.11	16.1885	1839.05	16.5775	1839.05	16.5775	103.005
-PENN J-1 Spot 268	828.473	2546.47	1.39635	8.56233	10.7628	1.27095	10.8572	0.0789604	1.42806	0.131532	489.914	6.73705	832.817	61.7736	1906.88	193.882	1906.88	193.882	25.692
-PENN J-1 Spot 264	679.262	22871.4	1.35698	8.51566	1.05748	5.24943	1.86991	0.324353	1.54217	0.82473	1810.95	24.3482	1860.68	15.9499	1916.69	18.9702	1916.69	18.9702	94.4833
-PENN J-1 Spot 250	417.197	53418.6	2.27292	8.093	0.813915	6.01143	1.73733	0.353001	1.53488	0.883471	1948.91	25.815	1977.5	15.1257	2007.52	14.4456	2007.52	14.4456	97.0806
-PENN J-1 Spot 186	757.539	1055.36	1.38792	7.67129	3.1722	1.34988	3.43326	0.0751367	1.31317	0.382485	467.028	5.916	867.508	20.0282	2101.99	55.7128	2101.99	55.7128	22.2184
-PENN J-1 Spot 181	148.452	95070.5	1.41362	7.38772	0.816956	7.21968	1.47169	0.387004	1.22411	0.831773	2108.92	22.018	2138.94	13.126	2167.88	14.2413	2167.88	14.2413	97.2804
-PENN J-1 Spot 194	30.1012	16458.2	1.85391	6.31598	0.7851	9.55131	1.2195	0.437715	0.93317	0.765205	2340.4	18.3146	2392.5	11.2095	2437.14	13.2988	2437.14	13.2988	96.0308
-PENN J-1 Spot 173	46.9765	30978.1	0.519813	5.86452	0.8055	10.7486	1.42523	0.457377	1.17577	0.824972	2427.96	23.7873	2501.64	13.2405	2561.98	13.4755	2561.98	13.4755	94.7691
-PENN J-1 Spot 83	553.061	65399.6	1.03654	5.69852	0.782455	11.225	1.55524	0.464124	1.34408	0.864223	2457.74	27.4664	2541.99	14.5009	2609.91	13.0322	2609.91	13.0322	94.1697
-PENN J-1 Spot 177	263.515	109283	1.44723	5.47594	0.857058	13.1388	1.55332	0.522039	1.29548	0.834004	2707.82	28.6436	2689.67	14.6577	2676.05	14.1816	2676.05	14.1816	101.187
-PENN J-1 Spot 295	123.555	780635	1.06569	5.42894	0.66216	13.3741	1.41679	0.526825	1.25253	0.884063	2728.06	27.8603	2706.43	13.3858	2690.3	10.9413	2690.3	10.9413	101.404
-PENN J-1 Spot 219	85.4407	51714.9	1.84519	5.38954	0.787354	12.6425	1.22798	0.494395	0.942342	0.767392	2589.66	20.0973	2653.39	11.5552	2702.33	12.9994	2702.33	12.9994	95.8307
-PENN J-1 Spot 106	110.386	524961	2.40988	5.3525	0.798887	13.3684	1.30615	0.519187	1.03335	0.79114	2695.73	22.7656	2706.03	12.34	2713.71	13.1756	2713.71	13.1756	99.3374
-PENN J-1 Spot 80	234.746	41690.1	1.29355	5.34308	0.753088	11.7896	1.55165	0.457064	1.35664	0.874321	2426.58	27.4337	2587.84	14.5243	2716.62	12.4168	2716.62	12.4168	89.3237
-PENN J-1 Spot 248	40.5336	15594.5	1.25118	5.31107	0.711035	12.077	1.30973	0.465404	1.09992	0.839805	2463.38	22.5192	2610.41	12.2824	2726.52	11.7092	2726.52	11.7092	90.3487
-PENN J-1 Spot 13	110.443	898872	2.14332	5.29092	0.819022	13.3513	1.48681	0.512556	1.24089	0.834598	2667.53	27.1071	2704.82	14.0457	2732.78	13.4804	2732.78	13.4804	97.6124
-PENN J-1 Spot 239	528.424	250091	5.27686	5.27879	0.889866	11.8014	2.23101	0.452017	2.04586	0.917011	2404.21	41.0567	2588.77	20.8867	2736.55	14.6417	2736.55	14.6417	87.8556
-PENN J-1 Spot 48	472.492	19713.2	1.75647	5.17961	0.914273	12.9377	1.72174	0.486232	1.45893	0.847361	2554.35	30.769	2675.13	16.2293	2767.72	15.0035	2767.72	15.0035	92.2908
-PENN J-1 Spot 56	200.318	89498.2	1.42853	5.05733	0.807229	15.0993	1.22311	0.554071	0.918902	0.751283	2842.08	21.1195	2821.52	11.6484	2806.85	13.1999	2806.85	13.1999	101.255
-PENN J-1 Spot 273	82.3199	51285.4	4.24045	4.93857	0.778226	15.956	1.64516	0.57176	1.44945	0.881041	2915.04	33.9901	2874.17	15.7207	2845.63	12.6816	2845.63	12.6816	102.439
-PENN J-1 Spot 40	233.833	23413	1.64047	4.57597	0.970464	17.7842	1.7752	0.590481	1.48645	0.837342	2991.37	35.5754	2978.14	17.0671	2969.2	15.6437	2969.2	15.6437	100.747
-PENN J-1 Spot 145	50.0562	62017.5	2.15756	4.39912	0.684156	18.491	1.29038	0.59022	1.09408	0.847875	2990.31	26.1774	3015.64	12.4307	3032.56	10.9647	3032.56	10.9647	98.6071
Penn J-2							Isotope ratios						Apparent ages (Ma)
Analysis	U	206Pb	U/Th	206Pb*	±	207Pb*	±	206Pb*	±	error	206Pb*	±	207Pb*	±	206Pb*	±	Best age	±	Conc
	(ppm)	204Pb		207Pb*	(%)	235U*	(%)	238U	(%)	corr.	238U*	(Ma)	235U	(Ma)	207Pb*	(Ma)	(Ma)	(Ma)	(%)
-PENN J-2 Spot 8	1005.55	350.365	2.51631	4.73159	5.19023	1.5611	6.60591	0.0535953	4.0865	0.618613	336.557	13.4006	954.905	40.9074	2915.17	84.1092	336.557	13.4006	NA
-PENN J-2 Spot 206	61.2922	36946.3	1.03688	15.5817	2.53782	0.532899	3.01782	0.0602486	1.63301	0.541122	377.137	5.982	433.732	10.653	746.561	53.6234	377.137	5.982	NA
-PENN J-2 Spot 202	1203.75	2045.22	8.76887	11.6253	1.3382	0.727779	2.52831	0.0613894	2.14512	0.848442	384.07	7.99814	555.249	10.814	1337.75	25.8708	384.07	7.99814	NA
-PENN J-2 Spot 117	201.808	5403.46	1.63367	19.0986	1.23424	0.444146	1.63385	0.0615482	1.07057	0.655243	385.034	4.00138	373.171	5.10225	300.181	28.1598	385.034	4.00138	NA
-PENN J-2 Spot 228	526.382	4670.37	1.3412	15.7476	1.58774	0.540418	2.24759	0.0617493	1.59083	0.707793	386.255	5.9642	438.7	8.00659	724.136	33.6771	386.255	5.9642	NA
-PENN J-2 Spot 191	94.7856	4043.18	1.48463	18.7441	1.72859	0.457836	2.11688	0.0622677	1.22196	0.577244	389.402	4.61746	382.752	6.75048	342.715	39.1194	389.402	4.61746	NA
-PENN J-2 Spot 302	280.344	22681.1	0.414775	18.0914	1.32523	0.479656	1.71666	0.0629638	1.09118	0.635641	393.625	4.16664	397.837	5.6505	422.36	29.5784	393.625	4.16664	NA
-PENN J-2 Spot 65	1299.95	22585.9	4.05927	17.4683	0.668915	0.499429	1.42737	0.0633012	1.26093	0.883392	395.671	4.8391	411.316	4.82745	500.11	14.7143	395.671	4.8391	NA
-PENN J-2 Spot 129	902.697	31331.2	1.82143	17.6886	0.997358	0.493506	1.70274	0.0633394	1.38007	0.810501	395.902	5.29934	407.297	5.71304	472.44	22.0889	395.902	5.29934	NA
-PENN J-2 Spot 177	103.479	57148.3	2.11576	17.581	1.25023	0.498048	1.62085	0.0635335	1.03154	0.636423	397.079	3.97245	410.38	5.4717	485.921	27.5983	397.079	3.97245	NA
-PENN J-2 Spot 163	667.126	9905.07	1.0122	16.146	0.991268	0.544742	1.70661	0.0638181	1.38922	0.814019	398.804	5.37235	441.546	6.11091	670.948	21.1945	398.804	5.37235	NA
-PENN J-2 Spot 293	566.994	524721	1.42483	18.1403	0.739949	0.489884	1.47655	0.06448	1.27776	0.865369	402.813	4.98947	404.832	4.92971	416.344	16.5323	402.813	4.98947	96.7501
-PENN J-2 Spot 272	97.542	45807.5	0.537692	17.8552	1.44703	0.499202	1.69304	0.0646737	0.87892	0.519136	403.986	3.44174	411.162	5.72425	451.627	32.1543	403.986	3.44174	89.4513
-PENN J-2 Spot 164	388.379	207266	1.58058	17.5655	1.08519	0.507697	1.65553	0.0647072	1.25026	0.755201	404.189	4.89826	416.899	5.66061	487.851	23.9445	404.189	4.89826	82.8509
-PENN J-2 Spot 115	28.1022	3802.15	1.08803	18.075	2.94023	0.493903	3.20817	0.064775	1.28352	0.400078	404.6	5.03351	407.567	10.7702	424.389	65.6112	404.6	5.03351	95.3371
-PENN J-2 Spot 278	492.574	22597.4	5.21297	17.644	1.06321	0.508007	1.65239	0.065036	1.2649	0.765499	406.18	4.97926	417.108	5.65214	477.988	23.5078	406.18	4.97926	84.9771
-PENN J-2 Spot 297	404.666	92469.4	1.20187	17.9931	0.915899	0.50057	1.49859	0.065352	1.18613	0.791497	408.092	4.69048	412.088	5.07605	434.511	20.4078	408.092	4.69048	93.9198
-PENN J-2 Spot 238	32.0818	2334.84	0.902453	19.694	2.50691	0.457835	3.1733	0.0654229	1.94557	0.613107	408.521	7.70146	382.751	10.1194	229.692	57.9211	408.521	7.70146	177.856
-PENN J-2 Spot 312	575.97	14354.9	1.13835	18.5569	1.30063	0.491235	2.3745	0.0661429	1.98661	0.836644	412.876	7.9451	405.752	7.94246	365.381	29.3163	412.876	7.9451	112.999
-PENN J-2 Spot 73	156.375	40961.8	2.02451	17.7545	1.51264	0.514671	1.96923	0.0663019	1.26087	0.640284	413.837	5.05397	421.585	6.79429	464.197	33.5178	413.837	5.05397	89.1512
-PENN J-2 Spot 2	463.861	42465.2	0.958931	17.8264	0.822605	0.514175	1.94338	0.0665063	1.7607	0.905996	415.073	7.07787	421.253	6.70085	455.246	18.2765	415.073	7.07787	91.1756
-PENN J-2 Spot 100	167.112	16364.4	1.15654	17.7511	1.114	0.517608	1.75608	0.0666676	1.35751	0.773033	416.048	5.46949	423.552	6.08165	464.587	24.6873	416.048	5.46949	89.5521
-PENN J-2 Spot 1	220.167	13100.7	1.3852	17.8318	1.41293	0.517131	2.02096	0.0669088	1.44496	0.714985	417.505	5.84157	423.233	6.99475	454.563	31.3689	417.505	5.84157	91.8476
-PENN J-2 Spot 153	1097.8	4103.23	2.06739	13.662	2.80021	0.675032	3.42889	0.0669156	1.9789	0.577127	417.546	8.00092	523.767	14.0317	1018.47	56.7149	417.546	8.00092	40.9973
-PENN J-2 Spot 152	206.258	24478.8	1.79671	17.7938	1.09404	0.519437	1.74458	0.0670642	1.35891	0.778934	418.444	5.50567	424.775	6.05587	459.289	24.2828	418.444	5.50567	91.107
-PENN J-2 Spot 261	193.432	8624.65	1.30417	17.4338	1.83254	0.536259	2.30758	0.0678351	1.40239	0.607734	423.1	5.743	435.955	8.1791	504.438	40.3266	423.1	5.743	83.8755
-PENN J-2 Spot 27	1182.57	8688.19	1.67526	16.5299	1.23244	0.570143	1.87077	0.0683821	1.40744	0.752331	426.401	5.80717	458.107	6.89767	620.414	26.5925	426.401	5.80717	68.7284
-PENN J-2 Spot 138	260.918	32151.1	0.674282	17.9922	0.883505	0.523879	1.49998	0.0683918	1.21218	0.808126	426.459	5.00216	427.74	5.23602	434.623	19.6814	426.459	5.00216	98.1217
-PENN J-2 Spot 161	275.242	18274.2	0.76935	17.7842	1.11991	0.53619	1.70482	0.0691895	1.28538	0.753971	431.271	5.36211	435.909	6.04208	460.468	24.8436	431.271	5.36211	93.6592
-PENN J-2 Spot 173	396.51	154697	1.26723	17.9594	1.26175	0.53551	1.98212	0.0697826	1.52866	0.771224	434.846	6.42808	435.459	7.01911	438.684	28.0848	434.846	6.42808	99.1251
-PENN J-2 Spot 81	338.599	33059.7	1.21695	18.0507	1.19702	0.539717	1.79412	0.0706884	1.33642	0.74489	440.302	5.68784	438.238	6.38576	427.391	26.7051	440.302	5.68784	103.021
-PENN J-2 Spot 69	124.705	9212.73	2.19054	17.4617	1.76636	0.572636	2.29823	0.0725524	1.47032	0.639762	451.515	6.41156	459.718	8.49736	500.929	38.875	451.515	6.41156	90.1354
-PENN J-2 Spot 87	806.612	41397.9	2.79882	17.928	0.628031	0.558384	1.35429	0.0726362	1.19986	0.885974	452.018	5.23782	450.474	4.92722	442.576	13.9675	452.018	5.23782	102.134
-PENN J-2 Spot 277	317.925	40885.6	1.28909	17.1936	1.32512	0.589089	2.19276	0.073491	1.74707	0.796745	457.154	7.71018	470.286	8.25396	534.892	29	457.154	7.71018	85.4666
-PENN J-2 Spot 199	121.165	47209.7	1.07888	17.4577	1.28487	0.58482	1.66071	0.0740794	1.05217	0.633567	460.686	4.67806	467.554	6.2226	501.396	28.3093	460.686	4.67806	91.8807
-PENN J-2 Spot 95	174.701	22777.5	1.77985	16.7085	1.83877	0.611873	2.5349	0.0741801	1.74489	0.688346	461.29	7.76777	484.741	9.77091	597.179	39.8327	461.29	7.76777	77.2448
-PENN J-2 Spot 19	648.671	9809.89	0.931308	16.0398	1.53886	0.639493	2.28539	0.0744255	1.68965	0.739327	462.763	7.54503	501.992	9.05165	685.054	32.8324	462.763	7.54503	67.5513
-PENN J-2 Spot 55	753.079	53600.5	1.83127	17.5911	0.742817	0.5879	1.48909	0.0750386	1.29058	0.866694	466.44	5.80718	469.526	5.59803	484.631	16.3989	466.44	5.80718	96.2464
-PENN J-2 Spot 308	379.001	43021.8	1.33041	17.5634	1.12472	0.590372	1.74012	0.0752355	1.32779	0.763044	467.621	5.98918	471.105	6.55908	488.111	24.8206	467.621	5.98918	95.8022
-PENN J-2 Spot 68	185.427	27406.2	0.845996	17.5202	1.1987	0.603789	1.6821	0.076756	1.18008	0.701549	476.73	5.42279	479.635	6.43021	493.568	26.4213	476.73	5.42279	96.5885
-PENN J-2 Spot 29	240.615	25498.1	1.7484	15.927	1.89811	0.665126	2.32129	0.0768645	1.33625	0.575649	477.38	6.14851	517.745	9.41516	700.056	40.4153	477.38	6.14851	68.1918
-PENN J-2 Spot 193	1085.81	4134.12	1.39892	13.5138	0.982333	0.806804	1.7431	0.0791106	1.43994	0.826079	490.812	6.80505	600.66	7.90349	1040.52	19.847	490.812	6.80505	47.1697
-PENN J-2 Spot 217	667.149	2.58855e+06	1.31538	17.6675	0.978048	0.618577	1.67637	0.0792968	1.36148	0.812161	491.924	6.44828	488.955	6.50526	475.088	21.6086	491.924	6.44828	103.544
-PENN J-2 Spot 75	410.629	18549.2	1.92977	17.5415	1.01488	0.635378	2.27425	0.0808697	2.03525	0.894909	501.312	9.81633	499.44	8.9721	490.851	22.3873	501.312	9.81633	102.131
-PENN J-2 Spot 236	231.937	18437.1	2.91165	17.0912	0.942134	0.676974	1.53945	0.0839521	1.21749	0.790863	519.67	6.07864	524.944	6.31025	547.972	20.5775	519.67	6.07864	94.8351
-PENN J-2 Spot 82	273.162	36824.8	1.33922	16.7291	1.19017	0.771977	2.21479	0.0937053	1.86782	0.843343	577.414	10.3162	580.896	9.79764	594.559	25.7717	577.414	10.3162	97.1163
-PENN J-2 Spot 107	529.219	22139.7	5.54282	14.5727	1.78882	0.910683	2.58165	0.0962933	1.86146	0.721037	592.649	10.54	657.421	12.4948	886.478	36.9787	592.649	10.54	66.8544
-PENN J-2 Spot 292	784.764	462819	1.14485	16.3513	0.850389	0.831791	1.85868	0.0986855	1.65273	0.889198	606.701	9.56976	614.605	8.57004	643.859	18.2782	606.701	9.56976	94.2288
-PENN J-2 Spot 233	789.865	97116.9	1.26289	16.1281	0.899205	0.846561	2.05943	0.099067	1.85275	0.899642	608.939	10.7656	622.76	9.58703	673.309	19.2535	608.939	10.7656	90.4397
-PENN J-2 Spot 229	537.259	37108.2	1.54457	16.5013	0.952662	0.845376	2.25315	0.101218	2.04184	0.906217	621.541	12.0983	622.108	10.481	624.15	20.5641	621.541	12.0983	99.5821
-PENN J-2 Spot 280	378.501	3659.64	1.34351	13.1548	3.65997	1.09297	4.07089	0.104323	1.78236	0.437829	639.692	10.8542	749.945	21.5889	1094.68	73.3174	639.692	10.8542	58.4364
-PENN J-2 Spot 74	181.24	19644.1	0.769772	16.0196	1.07065	0.913145	1.71515	0.10614	1.33994	0.781239	650.291	8.28846	658.728	8.31254	687.743	22.8406	650.291	8.28846	94.5544
-PENN J-2 Spot 94	368.611	31544.3	2.94273	15.9694	1.03307	0.974291	1.50486	0.112893	1.09425	0.72714	689.526	7.1556	690.673	7.54072	694.431	22.0162	689.526	7.1556	99.2937
-PENN J-2 Spot 23	495.526	1.23331e+06	2.4008	15.5332	0.835567	1.12218	1.84778	0.126477	1.64807	0.891917	767.738	11.9285	764.021	9.92147	753.144	17.6202	767.738	11.9285	101.938
-PENN J-2 Spot 114	22.5836	2141.42	1.94989	14.7877	1.73649	1.38877	2.26218	0.14901	1.44985	0.640907	895.414	12.1209	884.173	13.3548	856.127	36.045	895.414	12.1209	104.589
-PENN J-2 Spot 3	136.637	12571.8	4.60121	14.2267	0.804622	1.5783	1.22829	0.162922	0.928049	0.755563	972.993	8.38143	961.698	7.63474	935.942	16.483	935.942	16.483	103.959
-PENN J-2 Spot 242	178.461	17928.2	3.00291	14.1937	1.02484	1.52632	1.46971	0.157192	1.05346	0.716777	941.153	9.22487	941.021	9.01637	940.704	21.0044	940.704	21.0044	100.048
-PENN J-2 Spot 279	77.9443	9962.26	2.60616	14.1684	1.33976	1.54598	2.03839	0.158932	1.53626	0.753662	950.842	13.5812	948.892	12.5687	944.393	27.441	944.393	27.441	100.683
-PENN J-2 Spot 139	413.678	100805	4.02153	14.0553	0.857037	1.58012	1.8733	0.161145	1.66576	0.889209	963.139	14.9026	962.417	11.6495	960.788	17.4978	960.788	17.4978	100.245
-PENN J-2 Spot 303	121.283	117279	0.91775	14.0313	0.818293	1.5885	1.37292	0.161724	1.10241	0.802966	966.352	9.8931	965.711	8.55508	964.27	16.7243	964.27	16.7243	100.216
-PENN J-2 Spot 283	11.1082	3036.92	2.26464	13.928	2.64816	1.5601	3.1151	0.157663	1.64046	0.526615	943.776	14.4023	954.509	19.2775	979.349	53.9592	979.349	53.9592	96.3677
-PENN J-2 Spot 42	92.6997	37860.2	2.79156	13.9192	1.0514	1.55158	1.67322	0.156703	1.30163	0.777916	938.429	11.3674	951.124	10.3315	980.633	21.3972	980.633	21.3972	95.6962
-PENN J-2 Spot 273	176.156	61319.2	2.48511	13.9045	0.940762	1.59855	1.57594	0.161277	1.26434	0.802277	963.868	11.3193	969.645	9.84417	982.768	19.1364	982.768	19.1364	98.0769
-PENN J-2 Spot 80	597.921	40968.2	0.745956	13.8861	0.675216	1.61342	1.5172	0.16256	1.35867	0.895511	970.989	12.247	975.436	9.51094	985.46	13.7286	985.46	13.7286	98.5315
-PENN J-2 Spot 62	173.816	28432.3	3.21558	13.8629	0.58024	1.55987	1.15682	0.156903	1.00077	0.86511	939.542	8.7496	954.417	7.15769	988.889	11.8038	988.889	11.8038	95.0098
-PENN J-2 Spot 189	55.9433	7303.14	2.42973	13.8489	1.05297	1.67104	1.43983	0.167915	0.98201	0.682034	1000.61	9.10147	997.581	9.14656	990.948	21.409	990.948	21.409	100.975
-PENN J-2 Spot 299	147.237	27282.6	2.79998	13.8129	0.904116	1.68273	1.74588	0.168651	1.49355	0.855468	1004.68	13.8945	1002.02	11.1199	996.186	18.3719	996.186	18.3719	100.852
-PENN J-2 Spot 50	181.099	46189.5	55.7029	13.8032	0.958518	1.63237	1.43419	0.163488	1.06685	0.743863	976.129	9.66369	982.774	9.0307	997.628	19.4733	997.628	19.4733	97.845
-PENN J-2 Spot 311	152.146	36393.2	4.21565	13.7743	0.739166	1.54967	1.31232	0.15488	1.08435	0.826286	928.26	9.37447	950.361	8.09905	1001.88	15.0008	1001.88	15.0008	92.652
-PENN J-2 Spot 219	618.167	160165	2.07622	13.7524	0.960158	1.68208	1.98628	0.167846	1.73879	0.875402	1000.23	16.1098	1001.77	12.6493	1005.11	19.4651	1005.11	19.4651	99.5144
-PENN J-2 Spot 22	1076.46	5.60793e+06	2.47281	13.7508	0.839151	1.70953	1.49433	0.170567	1.23646	0.827437	1015.23	11.6144	1012.11	9.57351	1005.34	17.0087	1005.34	17.0087	100.984
-PENN J-2 Spot 13	41.7769	17753	2.09974	13.744	1.5629	1.54029	1.77822	0.153604	0.848198	0.476991	921.136	7.28052	946.621	10.9485	1006.35	31.6962	1006.35	31.6962	91.5324
-PENN J-2 Spot 262	98.8691	16605	1.40072	13.7343	1.26335	1.78045	1.68127	0.177429	1.10933	0.659817	1052.91	10.7763	1038.34	10.932	1007.78	25.622	1007.78	25.622	104.478
-PENN J-2 Spot 106	97.7391	10522.4	2.59431	13.7167	0.983953	1.72394	1.54161	0.171577	1.18676	0.769818	1020.79	11.2039	1017.49	9.90701	1010.38	19.9332	1010.38	19.9332	101.031
-PENN J-2 Spot 150	132.672	24801.5	1.57939	13.6706	0.881941	1.74145	1.52849	0.172737	1.24838	0.816742	1027.17	11.8536	1024	9.85906	1017.2	17.8635	1017.2	17.8635	100.98
-PENN J-2 Spot 220	52.7827	7429.01	2.56934	13.6679	1.96232	1.70123	2.45527	0.168715	1.47569	0.601028	1005.03	13.7328	1008.99	15.7024	1017.6	39.7677	1017.6	39.7677	98.7646
-PENN J-2 Spot 57	203.449	32783.5	2.19255	13.6478	0.841194	1.76056	1.34733	0.174342	1.05246	0.78115	1035.99	10.0724	1031.05	8.72503	1020.58	17.0306	1020.58	17.0306	101.51
-PENN J-2 Spot 147	20.6731	8110.08	5.62892	13.6273	1.84213	1.60583	2.29925	0.15878	1.37589	0.59841	949.992	12.1534	972.483	14.3879	1023.63	37.2806	1023.63	37.2806	92.8064
-PENN J-2 Spot 254	389.246	87949.4	6.33304	13.6071	0.98433	1.74898	1.5511	0.172679	1.19876	0.772841	1026.86	11.3792	1026.79	10.0207	1026.62	19.9279	1026.62	19.9279	100.023
-PENN J-2 Spot 83	312.952	39089.5	2.38716	13.6041	0.933999	1.83976	2.00455	0.181601	1.77366	0.884816	1075.72	17.5726	1059.77	13.1871	1027.06	18.9086	1027.06	18.9086	104.737
-PENN J-2 Spot 265	120.802	64004.6	2.45641	13.6032	0.778683	1.72189	1.31697	0.169955	1.06211	0.806476	1011.86	9.94609	1016.73	8.45964	1027.2	15.7675	1027.2	15.7675	98.507
-PENN J-2 Spot 28	241.569	55948.6	3.20005	13.587	0.631369	1.7307	1.32627	0.170621	1.16635	0.87942	1015.53	10.9588	1020.01	8.53534	1029.61	12.7644	1029.61	12.7644	98.6324
-PENN J-2 Spot 221	168.154	46197.5	2.77991	13.5756	1.2028	1.72715	1.90229	0.170129	1.47376	0.774731	1012.82	13.8131	1018.69	12.2334	1031.31	24.3307	1031.31	24.3307	98.2066
-PENN J-2 Spot 92	622.002	69633.9	3.71855	13.5558	0.861046	1.785	1.91966	0.175571	1.71572	0.893762	1042.73	16.5184	1040.01	12.4937	1034.26	17.4151	1034.26	17.4151	100.819
-PENN J-2 Spot 231	142.418	29912	1.49265	13.5498	1.06195	1.81189	1.71335	0.178137	1.34456	0.784754	1056.79	13.1056	1049.76	11.2106	1035.15	21.471	1035.15	21.471	102.091
-PENN J-2 Spot 17	984.135	32789	3.17482	13.5451	1.0439	1.75575	2.16342	0.172557	1.8949	0.875883	1026.19	17.9765	1029.28	13.9965	1035.86	21.1033	1035.86	21.1033	99.0662
-PENN J-2 Spot 151	625.698	31080.3	5.74411	13.5409	1.00611	1.68974	2.12252	0.166018	1.86892	0.880515	990.133	17.1537	1004.67	13.54	1036.49	20.3388	1036.49	20.3388	95.5275
-PENN J-2 Spot 126	152.405	37410.1	3.22406	13.5392	1.21429	1.85153	1.93097	0.181891	1.50139	0.777528	1077.3	14.8952	1063.97	12.7316	1036.74	24.5427	1036.74	24.5427	103.912
-PENN J-2 Spot 93	186.181	82909.8	5.73708	13.5241	0.869319	1.69336	1.38125	0.166167	1.07337	0.777104	990.96	9.85948	1006.03	8.81794	1038.99	17.5689	1038.99	17.5689	95.3775
-PENN J-2 Spot 20	80.3681	21382.3	1.5029	13.5186	0.860863	1.76609	1.44001	0.173234	1.15436	0.801632	1029.9	10.9877	1033.08	9.33585	1039.81	17.3972	1039.81	17.3972	99.0475
-PENN J-2 Spot 39	414.587	48167.9	2.59843	13.513	0.818909	1.83294	1.96541	0.179717	1.78668	0.909062	1065.43	17.5459	1057.33	12.9127	1040.64	16.5486	1040.64	16.5486	102.382
-PENN J-2 Spot 165	151.352	57012.5	0.843269	13.5108	1.04983	1.69479	1.89663	0.166145	1.57958	0.832833	990.836	14.5076	1006.57	12.1123	1040.97	21.2076	1040.97	21.2076	95.1841
-PENN J-2 Spot 198	76.1131	25722.9	1.05993	13.4633	0.975501	1.63787	1.3696	0.16	0.961349	0.701921	956.776	8.54793	984.893	8.63494	1048.11	19.6868	1048.11	19.6868	91.2854
-PENN J-2 Spot 15	95.8011	8789.31	1.31024	13.4392	0.918816	1.86242	1.71908	0.181609	1.45293	0.84518	1075.76	14.3955	1067.84	11.3576	1051.73	18.5332	1051.73	18.5332	102.285
-PENN J-2 Spot 36	430.224	149964	2.58321	13.4329	0.914718	1.8642	1.9182	0.181699	1.68606	0.878978	1076.25	16.7123	1068.48	12.6776	1052.67	18.4488	1052.67	18.4488	102.24
-PENN J-2 Spot 296	658.255	64505.4	1.29354	13.4293	0.743166	1.87588	1.63993	0.182788	1.46188	0.891425	1082.19	14.5637	1072.61	10.8619	1053.21	14.99	1053.21	14.99	102.751
-PENN J-2 Spot 0	1269.9	118984	2.53444	13.4184	0.635387	1.87928	1.46677	0.18297	1.322	0.901303	1083.18	13.1813	1073.81	9.72102	1054.85	12.8169	1054.85	12.8169	102.686
-PENN J-2 Spot 268	125.301	18243.3	297.168	13.4146	0.859912	1.8461	1.5309	0.179688	1.26658	0.82734	1065.27	12.4366	1062.04	10.0832	1055.42	17.3366	1055.42	17.3366	100.933
-PENN J-2 Spot 32	25.9151	10310.3	1.39482	13.4112	1.50937	1.81375	1.79656	0.176495	0.974396	0.542367	1047.8	9.42314	1050.43	11.7594	1055.94	30.4072	1055.94	30.4072	99.2292
-PENN J-2 Spot 160	563.23	99813.6	3.00771	13.4076	0.858304	1.79101	1.53538	0.174235	1.27306	0.829155	1035.4	12.1773	1042.19	10.0045	1056.48	17.302	1056.48	17.302	98.0056
-PENN J-2 Spot 260	135.874	61168.9	3.44589	13.3955	0.896539	1.82631	1.46328	0.177509	1.15646	0.790321	1053.35	11.2384	1054.95	9.60116	1058.29	18.0669	1058.29	18.0669	99.5331
-PENN J-2 Spot 158	104.928	23958.5	2.94262	13.3809	0.903255	1.71376	1.41061	0.166388	1.08349	0.7681	992.179	9.96372	1013.69	9.04536	1060.48	18.1937	1060.48	18.1937	93.559
-PENN J-2 Spot 195	581.06	107577	1.67828	13.364	0.775243	1.76933	1.84531	0.171566	1.67457	0.907471	1020.74	15.8084	1034.27	11.9717	1063.03	15.582	1063.03	15.582	96.0216
-PENN J-2 Spot 146	187.696	23215	2.67347	13.3618	0.836735	1.83441	1.43097	0.177848	1.16083	0.811224	1055.21	11.2992	1057.86	9.40383	1063.36	16.8133	1063.36	16.8133	99.2332
-PENN J-2 Spot 170	235.206	575160	2.53037	13.3553	0.840596	1.8532	1.34116	0.179582	1.04504	0.779207	1064.69	10.2563	1064.57	8.84531	1064.34	16.8868	1064.34	16.8868	100.033
-PENN J-2 Spot 240	134.369	189873	2.92566	13.3516	0.746472	1.8123	1.24003	0.17557	0.990174	0.798511	1042.73	9.53307	1049.91	8.11407	1064.9	15.0097	1064.9	15.0097	97.9186
-PENN J-2 Spot 275	192.899	229846	2.07176	13.3211	0.965638	1.83406	1.80206	0.177272	1.5215	0.844311	1052.06	14.7691	1057.73	11.8419	1069.49	19.3873	1069.49	19.3873	98.3698
-PENN J-2 Spot 9	111.435	23596.8	1.65468	13.3026	0.980952	1.73458	1.71748	0.167424	1.40978	0.820841	997.905	13.0335	1021.45	11.0623	1072.29	19.7055	1072.29	19.7055	93.0632
-PENN J-2 Spot 179	77.7812	11177.8	1.9075	13.2982	1.29333	1.80015	1.7554	0.173696	1.1869	0.67614	1032.44	11.3231	1045.51	11.4591	1072.95	25.9596	1072.95	25.9596	96.2248
-PENN J-2 Spot 212	172.742	41239.1	1.43872	13.2953	1.04567	1.90447	1.66129	0.183722	1.29092	0.777055	1087.27	12.916	1082.65	11.0612	1073.38	20.9836	1073.38	20.9836	101.294
-PENN J-2 Spot 101	662.624	262353	26.7301	13.2875	0.955412	1.82218	1.7912	0.175681	1.51512	0.845869	1043.34	14.5949	1053.47	11.7436	1074.56	19.1839	1074.56	19.1839	97.0944
-PENN J-2 Spot 200	448.621	87366.6	1.4974	13.2786	0.590108	1.79087	1.53442	0.172546	1.41642	0.923092	1026.13	13.4365	1042.14	9.99802	1075.88	11.8339	1075.88	11.8339	95.3752
-PENN J-2 Spot 127	65.6088	45374	1.23466	13.2732	0.894841	1.89445	1.39747	0.182451	1.0734	0.768102	1080.35	10.6769	1079.14	9.28758	1076.71	17.9523	1076.71	17.9523	100.339
-PENN J-2 Spot 18	326.564	618137	3.72327	13.2675	1.08182	1.96873	1.85153	0.189523	1.50261	0.811548	1118.79	15.4331	1104.87	12.468	1077.55	21.7141	1077.55	21.7141	103.827
-PENN J-2 Spot 287	232.584	75404.6	1.35743	13.2555	1.27103	1.8963	1.88693	0.182386	1.39463	0.7391	1080	13.8679	1079.79	12.545	1079.36	25.502	1079.36	25.502	100.059
-PENN J-2 Spot 96	74.7814	266044	0.920529	13.2306	0.910417	1.75767	1.57443	0.168735	1.28451	0.815858	1005.14	11.9549	1029.99	10.1897	1083.17	18.241	1083.17	18.241	92.7961
-PENN J-2 Spot 89	748.686	43366.1	15.6373	13.2201	0.969472	1.84748	2.36024	0.177216	2.15194	0.911747	1051.75	20.8832	1062.53	15.5503	1084.75	19.4201	1084.75	19.4201	96.9575
-PENN J-2 Spot 113	225.371	123057	1.27651	13.2056	0.942517	1.90594	1.55472	0.182623	1.23645	0.795289	1081.29	12.3085	1083.17	10.3543	1086.97	18.8732	1086.97	18.8732	99.4773
-PENN J-2 Spot 300	1174.01	17932.7	1.168	13.1962	0.930594	1.82838	1.97594	0.175066	1.74308	0.882153	1039.96	16.7408	1055.7	12.9705	1088.36	18.6313	1088.36	18.6313	95.5527
-PENN J-2 Spot 237	75.8176	53203.4	1.15974	13.1707	1.50128	1.83989	2.02884	0.175828	1.36468	0.672641	1044.14	13.1551	1059.82	13.3473	1092.27	30.0692	1092.27	30.0692	95.5944
-PENN J-2 Spot 284	262.215	17463.9	1.95713	13.1569	1.39628	1.86233	1.81735	0.177785	1.16325	0.640083	1054.86	11.3194	1067.81	12.0067	1094.35	27.9473	1094.35	27.9473	96.3915
-PENN J-2 Spot 252	101.511	19978.8	1.95724	13.1469	0.963295	1.97939	1.4145	0.188818	1.03579	0.732269	1114.97	10.6052	1108.51	9.54222	1095.85	19.2953	1095.85	19.2953	101.744
-PENN J-2 Spot 35	112.031	282873	2.12525	13.1182	0.840241	1.9003	1.32255	0.180877	1.02134	0.772249	1071.77	10.0848	1081.2	8.79897	1100.27	16.8272	1100.27	16.8272	97.4094
-PENN J-2 Spot 86	244.882	62361.8	2.85966	13.0842	0.752081	1.67995	1.65087	0.159489	1.46961	0.890202	953.935	13.0312	1000.96	10.5082	1105.43	15.0485	1105.43	15.0485	86.2954
-PENN J-2 Spot 148	47.6576	6942.45	1.88222	13.0379	1.29974	2.03183	1.6989	0.192213	1.09404	0.643971	1133.35	11.3706	1126.23	11.5611	1112.49	25.9661	1112.49	25.9661	101.875
-PENN J-2 Spot 235	94.7499	27210.4	1.46936	13.0342	0.854325	1.8628	1.55696	0.176172	1.30164	0.836011	1046.03	12.5682	1067.98	10.2872	1113.07	17.0462	1113.07	17.0462	93.9766
-PENN J-2 Spot 274	54.3321	43511.8	2.27651	13.0159	1.02603	1.90883	1.61668	0.180271	1.24937	0.772798	1068.46	12.3014	1084.17	10.7726	1115.91	20.4884	1115.91	20.4884	95.7473
-PENN J-2 Spot 103	317.298	108883	2.95129	13.0059	0.926192	2.00209	1.73359	0.188934	1.46544	0.845319	1115.6	15.012	1116.22	11.7397	1117.44	18.4993	1117.44	18.4993	99.8355
-PENN J-2 Spot 291	138.096	42737.3	2.8685	13.0045	0.591024	1.90609	1.34594	0.179856	1.20923	0.89843	1066.19	11.883	1083.22	8.964	1117.66	11.7937	1117.66	11.7937	95.3949
-PENN J-2 Spot 91	114.559	22282.5	1.23417	12.978	1.12777	1.88694	2.09937	0.177687	1.77072	0.843456	1054.32	17.2224	1076.51	13.9337	1121.68	22.4822	1121.68	22.4822	93.9948
-PENN J-2 Spot 145	298.497	34027.5	1.70573	12.928	1.09528	1.98788	1.52694	0.18647	1.06391	0.69676	1102.23	10.779	1111.4	10.3156	1129.39	21.8169	1129.39	21.8169	97.5945
-PENN J-2 Spot 187	311.866	37803.4	1.68614	12.8918	0.760621	1.96112	1.42441	0.183445	1.20433	0.845492	1085.77	12.0343	1102.27	9.57917	1135.01	15.1351	1135.01	15.1351	95.6617
-PENN J-2 Spot 227	293.546	64008.5	1.43138	12.8837	0.681805	2.12786	1.15661	0.198917	0.934279	0.807777	1169.5	9.99258	1157.89	7.9895	1136.25	13.5554	1136.25	13.5554	102.926
-PENN J-2 Spot 174	380.082	78558.4	3.43139	12.8553	0.773333	2.03965	1.25526	0.19025	0.988754	0.787688	1122.73	10.1881	1128.84	8.55275	1140.63	15.3779	1140.63	15.3779	98.4302
-PENN J-2 Spot 259	575.298	35233.9	4.93402	12.8453	0.61023	2.14672	1.39035	0.200082	1.24928	0.898535	1175.76	13.4269	1164	9.63132	1142.15	12.1135	1142.15	12.1135	102.942
-PENN J-2 Spot 43	138.246	45582	2.58447	12.8426	0.879372	1.99283	1.32433	0.185699	0.990234	0.747723	1098.03	9.9975	1113.08	8.95419	1142.61	17.4815	1142.61	17.4815	96.0988
-PENN J-2 Spot 14	45.4492	6816.02	1.46649	12.8208	1.2913	1.86904	1.79565	0.173868	1.24775	0.694876	1033.39	11.9137	1070.19	11.8783	1145.95	25.6596	1145.95	25.6596	90.1773
-PENN J-2 Spot 213	169.096	26582.9	2.29733	12.8138	0.672311	2.04911	1.27657	0.190515	1.08518	0.850079	1124.17	11.1948	1132	8.71117	1147.07	13.3382	1147.07	13.3382	98.003
-PENN J-2 Spot 120	627.498	8666.48	1.03508	12.7504	1.13058	1.83296	2.27401	0.169576	1.97305	0.86765	1009.77	18.4414	1057.34	14.9406	1156.88	22.4291	1156.88	22.4291	87.2841
-PENN J-2 Spot 45	254.088	83582.6	3.26395	12.743	0.927297	2.08953	1.55631	0.193201	1.24989	0.80311	1138.69	13.0462	1145.37	10.688	1158.02	18.4005	1158.02	18.4005	98.3306
-PENN J-2 Spot 167	245.774	36139.7	2.21162	12.7363	1.02489	2.07356	1.63755	0.191623	1.27718	0.779929	1130.16	13.2397	1140.11	11.2181	1159.07	20.3448	1159.07	20.3448	97.5058
-PENN J-2 Spot 288	220.489	81462.7	1.84744	12.7241	1.19179	2.15147	1.96398	0.198633	1.56104	0.794834	1167.97	16.6762	1165.53	13.6149	1160.97	23.6342	1160.97	23.6342	100.603
-PENN J-2 Spot 24	130.304	24352.7	1.99856	12.7163	0.921683	2.07193	1.79124	0.191172	1.53591	0.85746	1127.72	15.8904	1139.57	12.2678	1162.19	18.2784	1162.19	18.2784	97.0344
-PENN J-2 Spot 21	161.382	17158.7	1.97437	12.688	1.14087	2.03677	2.34649	0.187509	2.05047	0.873846	1107.86	20.8717	1127.88	15.9814	1166.61	22.604	1166.61	22.604	94.9645
-PENN J-2 Spot 310	730.186	153696	2.21533	12.666	0.819013	2.1053	1.80088	0.193483	1.60387	0.890602	1140.21	16.7616	1150.54	12.3979	1170.07	16.2356	1170.07	16.2356	97.4483
-PENN J-2 Spot 244	559.625	13794.9	13.5534	12.6627	1.00158	1.9557	2.07457	0.179687	1.81678	0.875737	1065.26	17.8391	1100.41	13.9389	1170.59	19.8483	1170.59	19.8483	91.0025
-PENN J-2 Spot 98	77.1596	29368.5	1.60364	12.6351	0.974981	2.06721	1.52701	0.189519	1.17523	0.769629	1118.77	12.0704	1138.01	10.4503	1174.91	19.3099	1174.91	19.3099	95.2219
-PENN J-2 Spot 77	223.23	75105.7	1.55922	12.6262	0.915939	2.11584	1.82585	0.19384	1.57949	0.86507	1142.14	16.5323	1153.98	12.59	1176.31	18.1375	1176.31	18.1375	97.0957
-PENN J-2 Spot 4	242.974	40458.3	2.72389	12.6201	0.658157	2.14526	0.966304	0.19644	0.707511	0.732183	1156.17	7.48844	1163.52	6.69227	1177.26	13.0175	1177.26	13.0175	98.2085
-PENN J-2 Spot 25	205.976	248156	1.84629	12.6186	0.907291	2.09635	1.45507	0.191939	1.13757	0.781795	1131.87	11.8088	1147.61	10.0033	1177.49	17.9519	1177.49	17.9519	96.126
-PENN J-2 Spot 142	536.299	30906.8	0.613671	12.6049	0.919293	2.15064	1.84013	0.196696	1.59405	0.866268	1157.55	16.8901	1165.26	12.7547	1179.64	18.1952	1179.64	18.1952	98.1274
-PENN J-2 Spot 298	217.99	141046	2.06682	12.6041	0.777433	2.12188	1.38835	0.194053	1.15026	0.828513	1143.29	12.0507	1155.95	9.58177	1179.77	15.3899	1179.77	15.3899	96.9078
-PENN J-2 Spot 85	413.806	59542.9	2.18959	12.5808	0.871585	2.18898	1.52093	0.199819	1.24642	0.819512	1174.35	13.3815	1177.54	10.6009	1183.43	17.2238	1183.43	17.2238	99.2323
-PENN J-2 Spot 67	137.749	33758.1	2.17017	12.5448	0.928993	2.04465	1.43316	0.186111	1.0913	0.761461	1100.27	11.0385	1130.51	9.77285	1189.07	18.3254	1189.07	18.3254	92.5322
-PENN J-2 Spot 215	131.064	282335	2.25133	12.5355	0.880228	2.13225	1.47671	0.19394	1.18569	0.802929	1142.69	12.4158	1159.32	10.2075	1190.55	17.3721	1190.55	17.3721	95.9796
-PENN J-2 Spot 243	61.7776	14935.2	3.53484	12.5326	1.02772	2.26345	1.56374	0.205826	1.17859	0.753699	1206.54	12.9688	1200.98	11.013	1190.99	20.2697	1190.99	20.2697	101.306
-PENN J-2 Spot 192	527.46	33557.2	2.49977	12.498	0.728789	2.10918	1.47692	0.191268	1.28459	0.869773	1128.24	13.2958	1151.81	10.1735	1196.45	14.3622	1196.45	14.3622	94.299
-PENN J-2 Spot 247	78.5563	17325.5	2.40593	12.4776	1.22748	2.22598	1.80668	0.201531	1.32566	0.733758	1183.54	14.3337	1189.25	12.6588	1199.66	24.1806	1199.66	24.1806	98.6559
-PENN J-2 Spot 313	736.851	44453.5	1.74085	12.4592	0.796729	2.11708	1.53822	0.191388	1.3158	0.855407	1128.89	13.6261	1154.39	10.6085	1202.56	15.6909	1202.56	15.6909	93.8737
-PENN J-2 Spot 63	379.305	207784	2.98802	12.4399	0.950924	2.24731	1.44662	0.202846	1.09017	0.753594	1190.59	11.8514	1195.94	10.1657	1205.65	18.7132	1205.65	18.7132	98.7513
-PENN J-2 Spot 258	68.6759	13255.5	9.20565	12.4219	1.12832	2.33713	1.88629	0.210648	1.51162	0.801371	1232.27	16.9551	1223.65	13.4145	1208.48	22.2162	1208.48	22.2162	101.968
-PENN J-2 Spot 271	913.27	7466.06	2.16774	12.407	2.77626	1.9279	3.1214	0.173555	1.42673	0.457078	1031.67	13.6017	1090.81	20.8723	1210.85	54.6572	1210.85	54.6572	85.2025
-PENN J-2 Spot 197	151.722	21144.2	1.66803	12.3842	0.884888	2.19065	1.6801	0.196848	1.42818	0.850058	1158.36	15.1424	1178.07	11.7133	1214.46	17.418	1214.46	17.418	95.381
-PENN J-2 Spot 294	684.073	130281	2.77074	12.3806	0.786355	2.38239	1.74943	0.214014	1.56274	0.893285	1250.17	17.7593	1237.33	12.5123	1215.03	15.471	1215.03	15.471	102.892
-PENN J-2 Spot 53	1072.06	22525.3	6.00382	12.367	0.810912	2.21101	1.70562	0.198401	1.50052	0.87975	1166.72	16.0141	1184.53	11.9256	1217.2	15.964	1217.2	15.964	95.8532
-PENN J-2 Spot 270	102.098	18167	2.64848	12.2907	0.961828	2.28347	1.58399	0.203639	1.25854	0.794536	1194.84	13.7262	1207.19	11.1857	1229.37	18.8901	1229.37	18.8901	97.1913
-PENN J-2 Spot 216	622.794	45565.4	1.44478	12.2387	1.21048	2.49085	2.10991	0.221192	1.72814	0.819059	1288.17	20.1783	1269.37	15.2877	1237.7	23.7258	1237.7	23.7258	104.078
-PENN J-2 Spot 263	162.132	347410	1.82306	12.1768	1.12198	2.35699	2.00574	0.208248	1.66257	0.828908	1219.48	18.4725	1229.68	14.3002	1247.58	21.9759	1247.58	21.9759	97.747
-PENN J-2 Spot 140	733.536	14081.9	1.80806	12.168	0.779262	2.11709	1.81159	0.186916	1.63542	0.902755	1104.64	16.6025	1154.39	12.494	1249.01	15.2546	1249.01	15.2546	88.4419
-PENN J-2 Spot 256	139.721	14354.4	3.40193	12.1216	1.41718	2.3867	2.33674	0.209916	1.85794	0.7951	1228.37	20.7798	1238.62	16.7225	1256.52	27.6939	1256.52	27.6939	97.7597
-PENN J-2 Spot 40	126.332	22539.9	14.7418	12.1109	1.65775	2.18239	2.60129	0.191776	2.00464	0.770633	1130.99	20.7949	1175.44	18.1152	1258.23	32.4096	1258.23	32.4096	89.8872
-PENN J-2 Spot 290	72.7307	16006.2	1.81548	12.0971	0.852341	2.33423	1.24555	0.204887	0.90824	0.72919	1201.52	9.95603	1222.77	8.85419	1260.45	16.6394	1260.45	16.6394	95.3247
-PENN J-2 Spot 132	211.219	48161.6	2.16408	12.0934	1.30968	2.38904	1.88046	0.209633	1.34939	0.717587	1226.86	15.0752	1239.32	13.4606	1261.03	25.5767	1261.03	25.5767	97.2903
-PENN J-2 Spot 47	188.365	47197	2.52529	12.0672	0.693856	2.23238	1.31245	0.195462	1.11404	0.848825	1150.9	11.7421	1191.27	9.20384	1265.3	13.5508	1265.3	13.5508	90.9584
-PENN J-2 Spot 130	172.994	78836.2	2.72291	12.061	0.911872	2.58971	1.84711	0.226633	1.60633	0.869646	1316.83	19.1321	1297.73	13.5313	1266.3	17.807	1266.3	17.807	103.99
-PENN J-2 Spot 224	253.904	36626.1	1.55442	12.0542	1.1317	2.06398	1.64563	0.180522	1.19473	0.725998	1069.83	11.7772	1136.94	11.2564	1267.39	22.0913	1267.39	22.0913	84.4117
-PENN J-2 Spot 314	739.859	9334.25	1.29393	12.029	1.19297	1.96815	2.23156	0.171782	1.88592	0.845113	1021.92	17.8227	1104.67	15.026	1271.47	23.2604	1271.47	23.2604	80.3729
-PENN J-2 Spot 295	1266.62	8160.33	2.73119	11.9542	0.886865	2.06033	1.74947	0.178708	1.50802	0.861985	1059.91	14.7388	1135.73	11.9598	1283.63	17.2745	1283.63	17.2745	82.5718
-PENN J-2 Spot 305	100.955	83594.1	2.58657	11.931	0.951942	2.47337	1.70699	0.214119	1.4169	0.83006	1250.72	16.1084	1264.28	12.343	1287.4	18.5151	1287.4	18.5151	97.1514
-PENN J-2 Spot 70	280.67	156688	4.68174	11.9009	0.801553	2.35926	1.11856	0.203725	0.780183	0.69749	1195.3	8.512	1230.36	7.97681	1292.32	15.5943	1292.32	15.5943	92.4928
-PENN J-2 Spot 222	23.0172	3221.27	2.47892	11.8506	1.51813	2.63913	2.31582	0.226929	1.74879	0.755152	1318.38	20.8511	1311.62	17.0545	1300.55	29.495	1300.55	29.495	101.371
-PENN J-2 Spot 6	39.9455	10190.2	1.88104	11.845	1.3794	2.56976	1.9221	0.22086	1.33855	0.6964	1286.42	15.61	1292.07	14.0503	1301.47	26.8034	1301.47	26.8034	98.8437
-PENN J-2 Spot 239	297.477	47155.2	7.67829	11.766	0.919438	2.63348	1.47996	0.224826	1.1597	0.783605	1307.32	13.7226	1310.04	10.8919	1314.46	17.8314	1314.46	17.8314	99.4572
-PENN J-2 Spot 59	142	202351	1.71479	11.7425	0.817254	2.53654	1.24676	0.216118	0.941546	0.755194	1261.33	10.7864	1282.58	9.08004	1318.34	15.841	1318.34	15.841	95.6758
-PENN J-2 Spot 48	280.184	61784.2	1.09327	11.6226	0.772448	2.72545	1.50294	0.229841	1.28925	0.857816	1333.67	15.5323	1335.42	11.1648	1338.21	14.9317	1338.21	14.9317	99.6603
-PENN J-2 Spot 276	137.896	29535.8	1.59678	11.5558	0.8695	2.85384	1.41078	0.239285	1.11098	0.787493	1382.98	13.8284	1369.82	10.6082	1349.35	16.7821	1349.35	16.7821	102.493
-PENN J-2 Spot 61	447.591	77125.3	2.03723	11.5395	0.859288	2.83349	1.90487	0.237245	1.70005	0.892474	1372.36	21.0147	1364.45	14.2972	1352.06	16.5789	1352.06	16.5789	101.502
-PENN J-2 Spot 143	159.147	143316	1.77411	11.5338	0.84016	2.71545	1.53797	0.227249	1.28821	0.837603	1320.06	15.3771	1332.69	11.4137	1353.02	16.2078	1353.02	16.2078	97.5643
-PENN J-2 Spot 185	99.2586	202882	2.33899	11.5167	0.962368	2.66819	1.59255	0.222963	1.26888	0.79676	1297.51	14.9128	1319.69	11.7627	1355.88	18.5578	1355.88	18.5578	95.6954
-PENN J-2 Spot 188	412.144	42779.5	2.08593	11.4995	0.759485	2.83197	1.4049	0.236296	1.18192	0.841282	1367.41	14.5627	1364.04	10.5429	1358.76	14.6388	1358.76	14.6388	100.637
-PENN J-2 Spot 249	56.207	14352	2.42838	11.4881	1.32644	2.55116	1.92537	0.212655	1.39557	0.72483	1242.94	15.7764	1286.77	14.0456	1360.67	25.5611	1360.67	25.5611	91.3482
-PENN J-2 Spot 38	402.267	21807.5	3.04412	11.4309	0.912385	2.7639	2.09986	0.22924	1.89129	0.900673	1330.51	22.7369	1345.84	15.6581	1370.28	17.5581	1370.28	17.5581	97.0978
-PENN J-2 Spot 159	719.08	16897.4	4.13238	11.3944	0.757764	2.61661	1.9278	0.216331	1.77262	0.919507	1262.46	20.3237	1305.31	14.1631	1376.44	14.5691	1376.44	14.5691	91.7192
-PENN J-2 Spot 26	182.603	191283	2.4786	11.3886	0.706881	2.87008	1.19587	0.237167	0.964587	0.806598	1371.95	11.9203	1374.09	9.00534	1377.41	13.589	1377.41	13.589	99.604
-PENN J-2 Spot 282	423.724	57989.5	0.681644	11.3726	0.565733	2.87467	1.43135	0.237211	1.3148	0.918576	1372.18	16.2507	1375.3	10.7832	1380.12	10.8715	1380.12	10.8715	99.4248
-PENN J-2 Spot 181	206.987	102095	2.51464	11.351	1.20871	2.75931	1.94751	0.227259	1.52703	0.784093	1320.12	18.2286	1344.61	14.5155	1383.77	23.2178	1383.77	23.2178	95.4002
-PENN J-2 Spot 102	315.113	146138	1.9889	11.0565	0.640968	3.07665	1.09421	0.246823	0.886821	0.810468	1422.07	11.3171	1426.89	8.38522	1434.08	12.2272	1434.08	12.2272	99.1624
-PENN J-2 Spot 7	791.901	1469.14	1.51207	11.0231	4.73856	0.829265	5.1306	0.0663259	1.967	0.383385	413.983	7.88707	613.204	23.6207	1439.86	90.3713	1439.86	90.3713	28.7516
-PENN J-2 Spot 289	147.646	121075	3.45349	10.9933	0.758292	3.07116	1.34793	0.244973	1.11441	0.826756	1412.5	14.1359	1425.52	10.3252	1445.01	14.444	1445.01	14.444	97.7501
-PENN J-2 Spot 104	659.762	43763	2.51377	10.9868	0.719193	3.22688	1.48479	0.257243	1.29898	0.874861	1475.72	17.1335	1463.64	11.51	1446.13	13.6971	1446.13	13.6971	102.046
-PENN J-2 Spot 234	635.403	428379	3.0539	10.928	0.922104	3.22088	1.8676	0.25539	1.62409	0.869611	1466.21	21.2988	1462.2	14.4716	1456.35	17.5376	1456.35	17.5376	100.677
-PENN J-2 Spot 54	105.897	24160.5	2.74403	10.9197	1.01862	2.83971	1.69274	0.224995	1.35195	0.798677	1308.21	16.0073	1366.09	12.7121	1457.8	19.3696	1457.8	19.3696	89.7391
-PENN J-2 Spot 78	408.836	91451.4	1.87933	10.8848	0.531839	3.07927	1.43812	0.243195	1.33617	0.929106	1403.28	16.8498	1427.55	11.0232	1463.89	10.1047	1463.89	10.1047	95.8601
-PENN J-2 Spot 225	176.75	699266	1.84541	10.8795	0.947829	3.25273	1.50101	0.25677	1.1639	0.775409	1473.3	15.3293	1469.83	11.6577	1464.81	18.0064	1464.81	18.0064	100.58
-PENN J-2 Spot 84	615.258	27596	2.57917	10.8641	0.826761	3.01361	1.83307	0.237556	1.63603	0.892511	1373.98	20.2448	1411.07	13.9762	1467.5	15.7006	1467.5	15.7006	93.6272
-PENN J-2 Spot 155	770.763	87603.3	1.99781	10.7991	0.614382	3.17746	1.66634	0.248975	1.54895	0.929548	1433.19	19.9048	1451.7	12.8702	1478.88	11.6495	1478.88	11.6495	96.9101
-PENN J-2 Spot 33	216.582	631799	1.65939	10.7836	1.00451	3.23989	1.53712	0.253503	1.16348	0.756926	1456.52	15.1683	1466.76	11.927	1481.6	19.0402	1481.6	19.0402	98.3073
-PENN J-2 Spot 194	272.961	84248.3	2.79919	10.7747	0.982288	3.13484	1.94798	0.24508	1.68218	0.863552	1413.05	21.3453	1441.28	14.9969	1483.17	18.6151	1483.17	18.6151	95.2724
-PENN J-2 Spot 226	261.298	162015	3.03844	10.7371	0.638898	3.40298	1.21191	0.265115	1.02982	0.849751	1515.96	13.9118	1505.08	9.51095	1489.79	12.0967	1489.79	12.0967	101.757
-PENN J-2 Spot 51	175.503	156907	2.13618	10.7181	1.02636	3.21021	1.72994	0.249654	1.39258	0.804985	1436.69	17.9344	1459.63	13.3942	1493.15	19.4245	1493.15	19.4245	96.219
-PENN J-2 Spot 157	476.692	110546	0.946565	10.7166	0.82407	3.17147	1.86604	0.246606	1.67422	0.897205	1420.95	21.3505	1450.24	14.4063	1493.41	15.5953	1493.41	15.5953	95.1478
-PENN J-2 Spot 245	636.817	71080.3	5.62939	10.7085	0.731742	3.29505	1.53486	0.256023	1.3492	0.879039	1469.46	17.7287	1479.88	11.9567	1494.84	13.8453	1494.84	13.8453	98.3027
-PENN J-2 Spot 267	499.346	1.81161e+06	4.38143	10.7001	0.970005	3.39087	2.22059	0.263262	1.99752	0.899547	1506.51	26.8353	1502.29	17.4141	1496.32	18.3501	1496.32	18.3501	100.681
-PENN J-2 Spot 241	103.875	633736	2.24804	10.6929	0.974527	3.32621	1.57457	0.258068	1.23676	0.785457	1479.95	16.3544	1487.22	12.2929	1497.6	18.4325	1497.6	18.4325	98.8217
-PENN J-2 Spot 156	852.302	88013.6	2.20562	10.6906	0.88368	3.35367	1.84608	0.260142	1.62084	0.87799	1490.57	21.57	1493.65	14.4402	1498.01	16.7132	1498.01	16.7132	99.5034
-PENN J-2 Spot 285	165.422	587433	2.65103	10.6552	0.796316	3.36184	1.30289	0.259912	1.03121	0.791481	1489.39	13.7136	1495.55	10.1967	1504.28	15.0482	1504.28	15.0482	99.01
-PENN J-2 Spot 119	688.669	20585	5.07093	10.5734	0.919599	3.26873	1.728	0.250772	1.46298	0.846634	1442.46	18.9086	1473.64	13.4363	1518.83	17.3429	1518.83	17.3429	94.9716
-PENN J-2 Spot 71	246.095	2.53267e+06	2.37807	10.5709	1.02161	3.48079	1.62844	0.26698	1.26812	0.778733	1525.45	17.2262	1522.87	12.8454	1519.27	19.266	1519.27	19.266	100.407
-PENN J-2 Spot 128	276.065	54335.4	2.29075	10.5369	0.726313	3.37991	1.50411	0.258407	1.31712	0.875684	1481.69	17.4353	1499.75	11.7861	1525.35	13.6854	1525.35	13.6854	97.1379
-PENN J-2 Spot 122	403.662	117997	1.23338	10.4893	0.871448	3.42102	1.79759	0.260371	1.57223	0.874632	1491.74	20.9377	1509.24	14.1248	1533.86	16.402	1533.86	16.402	97.2539
-PENN J-2 Spot 169	301.753	44682.5	1.83231	10.4302	0.702735	3.51622	1.20362	0.266106	0.977175	0.811862	1521.01	13.2396	1530.87	9.51555	1544.51	13.2092	1544.51	13.2092	98.4786
-PENN J-2 Spot 56	260.699	135389	3.04716	10.3892	0.630521	3.53981	1.32857	0.266838	1.16942	0.88021	1524.73	15.8788	1536.16	10.519	1551.9	11.8402	1551.9	11.8402	98.2494
-PENN J-2 Spot 90	667.69	111315	1.54775	10.2378	1.0622	3.59145	2.16938	0.266786	1.89155	0.871929	1524.47	25.6802	1547.64	17.2317	1579.41	19.8735	1579.41	19.8735	96.5211
-PENN J-2 Spot 230	554.879	73469.4	2.83902	10.227	0.951532	3.85775	1.98841	0.286266	1.74596	0.878066	1622.84	25.0492	1604.89	16.0351	1581.38	17.7981	1581.38	17.7981	102.622
-PENN J-2 Spot 203	329.595	68481.3	5.41409	10.0941	0.903214	3.89197	1.54646	0.285052	1.25528	0.811715	1616.75	17.95	1612.02	12.4933	1605.82	16.8405	1605.82	16.8405	100.681
-PENN J-2 Spot 64	232.746	52646	2.25755	10.0879	0.71669	3.75725	1.54666	0.275015	1.37059	0.88616	1566.21	19.0576	1583.66	12.404	1606.97	13.3619	1606.97	13.3619	97.4637
-PENN J-2 Spot 137	1321.37	16032	2.09471	10.0858	0.890384	3.26498	1.67313	0.238934	1.41654	0.84664	1381.15	17.6108	1472.75	13.0061	1607.35	16.5979	1607.35	16.5979	85.9274
-PENN J-2 Spot 12	339.942	18692.1	2.01398	10.0546	1.30816	3.47578	2.34403	0.253573	1.94504	0.829785	1456.88	25.3631	1521.73	18.4852	1613.13	24.369	1613.13	24.369	90.3137
-PENN J-2 Spot 125	292.065	135167	5.89941	10.0414	0.688246	3.80936	1.45357	0.277546	1.28031	0.880801	1578.99	17.9305	1594.72	11.691	1615.56	12.8157	1615.56	12.8157	97.7361
-PENN J-2 Spot 255	285.654	46044.7	2.2131	10.0281	0.738002	4.06748	1.43212	0.295961	1.22733	0.856998	1671.25	18.0685	1647.81	11.6725	1618.03	13.738	1618.03	13.738	103.289
-PENN J-2 Spot 196	127.604	7.27939e+06	1.49649	10.0143	0.846239	3.65739	1.2705	0.265753	0.947654	0.745891	1519.21	12.8262	1562.12	10.1309	1620.61	15.7479	1620.61	15.7479	93.7431
-PENN J-2 Spot 176	641.737	157410	2.13009	10.0131	0.64111	3.89906	1.52753	0.283281	1.38648	0.907661	1607.87	19.73	1613.49	12.3449	1620.82	11.9298	1620.82	11.9298	99.2011
-PENN J-2 Spot 250	90.0019	17530.9	1.10814	9.9996	0.762391	3.9074	1.28655	0.283503	1.03633	0.805507	1608.98	14.7562	1615.21	10.4018	1623.33	14.1823	1623.33	14.1823	99.116
-PENN J-2 Spot 37	719.975	1.91462e+06	5.16041	9.99014	0.701562	3.81849	1.78046	0.276791	1.63641	0.919096	1575.18	22.8688	1596.65	14.3275	1625.09	13.0476	1625.09	13.0476	96.9287
-PENN J-2 Spot 41	179.024	34867.3	0.882951	9.98042	0.706479	3.94139	1.33155	0.285421	1.12868	0.847643	1618.61	16.1559	1622.22	10.7846	1626.9	13.1361	1626.9	13.1361	99.4903
-PENN J-2 Spot 251	141.386	36784.7	1.10046	9.96344	0.855781	3.95587	1.65666	0.285982	1.41851	0.856245	1621.42	20.3355	1625.19	13.428	1630.07	15.9061	1630.07	15.9061	99.4695
-PENN J-2 Spot 141	104.949	17958.8	1.30781	9.91272	0.928237	3.69887	1.36508	0.266041	1.00091	0.733225	1520.68	13.5586	1571.12	10.9114	1639.55	17.2336	1639.55	17.2336	92.7497
-PENN J-2 Spot 88	302.896	5.17012e+06	0.488149	9.90747	1.01531	4.04532	1.84406	0.290806	1.53938	0.834779	1645.55	22.3567	1643.36	15.0141	1640.53	18.8479	1640.53	18.8479	100.306
-PENN J-2 Spot 99	682.597	16279.2	1.30863	9.86464	0.765097	3.3601	1.51507	0.240504	1.3077	0.863125	1389.31	16.3437	1495.15	11.856	1648.57	14.1882	1648.57	14.1882	84.274
-PENN J-2 Spot 209	135.525	38396.3	1.24767	9.85395	0.784807	3.69265	1.37463	0.26402	1.12858	0.821005	1510.37	15.1962	1569.78	10.9838	1650.58	14.5483	1650.58	14.5483	91.5058
-PENN J-2 Spot 154	58.9983	33579.2	1.27526	9.82755	0.795262	3.83127	1.16884	0.273197	0.856595	0.732857	1557.01	11.8488	1599.34	9.41197	1655.55	14.7327	1655.55	14.7327	94.0478
-PENN J-2 Spot 66	236.819	74486.6	1.79747	9.78629	0.62813	3.96997	1.22816	0.281899	1.05539	0.85932	1600.92	14.9613	1628.08	9.96171	1663.34	11.6245	1663.34	11.6245	96.2472
-PENN J-2 Spot 246	308.855	62435.8	0.652686	9.78324	0.851891	4.15464	1.31544	0.29492	1.00233	0.761972	1666.07	14.716	1665.12	10.7659	1663.92	15.7651	1663.92	15.7651	100.129
-PENN J-2 Spot 205	239.931	95619.8	3.42145	9.77938	0.480966	4.02165	1.04805	0.285367	0.931175	0.888481	1618.33	13.3268	1638.58	8.52277	1664.65	8.8991	1664.65	8.8991	97.2179
-PENN J-2 Spot 31	611.545	34889.4	4.74238	9.77594	0.708014	3.82896	2.3326	0.271599	2.22255	0.952822	1548.91	30.602	1598.85	18.7822	1665.3	13.0999	1665.3	13.0999	93.0111
-PENN J-2 Spot 281	156.897	64090.6	1.2686	9.77308	0.999903	3.97567	1.43687	0.281922	1.03188	0.718148	1601.04	14.6291	1629.24	11.658	1665.84	18.5001	1665.84	18.5001	96.1099
-PENN J-2 Spot 52	173.704	76880	1.55099	9.75535	0.715642	4.2541	1.25309	0.301119	1.02863	0.820879	1696.86	15.3462	1684.53	10.3023	1669.2	13.2345	1669.2	13.2345	101.657
-PENN J-2 Spot 11	893.269	1589.25	1.80796	9.75325	5.12938	1.38115	5.30161	0.0977415	1.34038	0.252825	601.16	7.69353	880.931	31.2341	1669.6	94.9209	1669.6	94.9209	36.0063
-PENN J-2 Spot 184	224.152	275009	1.51173	9.70209	0.773049	4.11613	1.38075	0.289762	1.14405	0.828576	1640.34	16.5691	1657.51	11.28	1679.32	14.2796	1679.32	14.2796	97.6791
-PENN J-2 Spot 112	224.688	76389.7	1.40443	9.66541	0.879822	3.92792	1.70291	0.275467	1.45801	0.856191	1568.49	20.2994	1619.45	13.7831	1686.31	16.2375	1686.31	16.2375	93.0134
-PENN J-2 Spot 34	220.054	341824	1.23587	9.64232	0.664625	4.32384	1.12159	0.30251	0.903458	0.805516	1703.74	13.5265	1697.92	9.24955	1690.72	12.2589	1690.72	12.2589	100.77
-PENN J-2 Spot 133	148.831	31370.9	1.49202	9.61739	0.862687	4.20589	1.31383	0.293496	0.990923	0.754223	1658.98	14.4943	1675.17	10.7783	1695.5	15.901	1695.5	15.901	97.8461
-PENN J-2 Spot 186	88.2141	10575.7	2.16956	9.49293	0.831477	4.2562	1.37597	0.293163	1.09633	0.796769	1657.32	16.022	1684.93	11.3138	1719.47	15.2812	1719.47	15.2812	96.3855
-PENN J-2 Spot 166	725.973	110776	1.82149	9.44669	0.84022	4.40705	1.77227	0.302075	1.56044	0.880475	1701.59	23.3371	1713.66	14.6682	1728.44	15.4226	1728.44	15.4226	98.4467
-PENN J-2 Spot 257	275.674	88975.4	1.74841	9.42388	1.0546	4.546	1.78037	0.310847	1.4344	0.805679	1744.87	21.9274	1739.43	14.819	1732.87	19.3477	1732.87	19.3477	100.693
-PENN J-2 Spot 211	529.671	81038.4	4.02819	9.4009	1.05061	4.54302	2.10597	0.309886	1.8252	0.866677	1740.15	27.8355	1738.88	17.5276	1737.35	19.2636	1737.35	19.2636	100.161
-PENN J-2 Spot 124	332.564	211462	2.59508	9.39082	0.843145	4.51468	1.35161	0.307622	1.05638	0.781577	1729	16.0205	1733.68	11.2358	1739.32	15.4553	1739.32	15.4553	99.4065
-PENN J-2 Spot 110	462.807	49143.9	3.52819	9.36819	0.866396	4.60691	1.81733	0.313151	1.59751	0.879043	1756.19	24.5585	1750.52	15.1629	1743.74	15.8728	1743.74	15.8728	100.714
-PENN J-2 Spot 172	376.412	546990	3.40602	9.31314	0.67238	4.57892	1.15935	0.309419	0.944455	0.814643	1737.85	14.3869	1745.44	9.66207	1754.53	12.3013	1754.53	12.3013	99.0492
-PENN J-2 Spot 207	397.433	94211.4	1.27806	9.22728	0.979589	4.97985	1.86531	0.333409	1.58738	0.851002	1854.88	25.5868	1815.91	15.774	1771.46	17.8851	1771.46	17.8851	104.709
-PENN J-2 Spot 49	866.394	351999	1.90764	9.07395	0.758253	4.73994	1.66778	0.312073	1.48544	0.890671	1750.9	22.7758	1774.33	13.985	1801.99	13.7933	1801.99	13.7933	97.1648
-PENN J-2 Spot 136	595.3	11662.6	2.36479	9.0514	1.12663	4.17738	2.34693	0.274351	2.05883	0.877244	1562.85	28.5732	1669.59	19.2298	1806.52	20.4815	1806.52	20.4815	86.5119
-PENN J-2 Spot 10	413.277	39981.8	1.64879	9.02498	0.939832	4.85659	1.88947	0.318028	1.63915	0.867519	1780.09	25.4965	1794.76	15.9108	1811.83	17.074	1811.83	17.074	98.2483
-PENN J-2 Spot 30	663.61	22471.9	2.56017	8.97506	1.11858	3.96501	2.57203	0.258208	2.31606	0.900479	1480.67	30.6399	1627.06	20.8589	1821.9	20.2969	1821.9	20.2969	81.2705
-PENN J-2 Spot 190	109.218	64120.9	2.73029	8.84548	0.940137	4.98266	1.51956	0.319794	1.19382	0.785634	1788.72	18.6475	1816.38	12.851	1848.24	17.004	1848.24	17.004	96.7797
-PENN J-2 Spot 266	208.008	26103.3	1.06751	8.74138	0.64004	5.23263	1.22374	0.331885	1.04302	0.85232	1847.51	16.7545	1857.95	10.4324	1869.63	11.5475	1869.63	11.5475	98.8171
-PENN J-2 Spot 44	108.949	38219.7	2.33657	8.71973	0.745926	5.12036	1.33184	0.32396	1.10335	0.828443	1809.04	17.404	1839.49	11.3142	1874.1	13.4507	1874.1	13.4507	96.5283
-PENN J-2 Spot 232	652.234	154283	42.1586	8.7074	1.0831	5.23118	2.16503	0.330504	1.87463	0.865869	1840.82	30.0191	1857.71	18.4574	1876.65	19.5231	1876.65	19.5231	98.0908
-PENN J-2 Spot 204	162.568	32426.6	1.19058	8.67087	0.727104	5.32214	1.26141	0.334839	1.03076	0.817152	1861.8	16.668	1872.42	10.7826	1884.23	13.0934	1884.23	13.0934	98.8095
-PENN J-2 Spot 269	859.89	12416.1	11.8603	8.54365	0.905388	4.74013	1.82677	0.293847	1.58662	0.868538	1660.73	23.2291	1774.36	15.3185	1910.8	16.2527	1910.8	16.2527	86.9126
-PENN J-2 Spot 218	428.283	586961	1.90197	8.47325	0.811356	5.39963	1.55367	0.331972	1.32499	0.852812	1847.93	21.2882	1884.79	13.3114	1925.64	14.5389	1925.64	14.5389	95.9645
-PENN J-2 Spot 121	278.204	525248	4.48988	8.3805	0.834755	5.77134	1.44341	0.350941	1.17754	0.815808	1939.09	19.7194	1942.12	12.4923	1945.34	14.9255	1945.34	14.9255	99.6788
-PENN J-2 Spot 134	249.377	52758.2	2.33912	8.28872	0.754572	5.76895	1.11688	0.346954	0.823429	0.73726	1920.04	13.673	1941.76	9.66549	1965	13.4586	1965	13.4586	97.7116
-PENN J-2 Spot 201	104.845	281491	1.29463	8.26473	0.885232	5.89908	1.64732	0.353753	1.38925	0.843341	1952.5	23.4024	1961.1	14.303	1970.17	15.78	1970.17	15.78	99.1028
-PENN J-2 Spot 214	880.271	42355.4	2.48462	8.19299	0.814409	5.53855	1.66684	0.32925	1.45433	0.872511	1834.75	23.2222	1906.6	14.3373	1985.7	14.4909	1985.7	14.4909	92.398
-PENN J-2 Spot 178	331.629	2673.37	1.41427	8.03753	2.98762	5.44092	3.22158	0.317309	1.20527	0.374123	1776.58	18.7153	1891.33	27.6395	2019.72	52.9653	2019.72	52.9653	87.9616
-PENN J-2 Spot 264	169.737	48946.4	1.57657	7.38967	0.72408	7.30169	1.41942	0.391504	1.22084	0.860101	2129.8	22.1427	2149.02	12.6771	2167.42	12.6229	2167.42	12.6229	98.2642
-PENN J-2 Spot 118	56.2185	43127.6	0.704292	6.44316	1.01727	8.53044	1.84606	0.398803	1.54049	0.834475	2163.52	28.3127	2289.17	16.7793	2403.31	17.2946	2403.31	17.2946	90.0228
-PENN J-2 Spot 79	199.834	47998.8	1.39038	5.9487	0.791832	10.295	1.64938	0.44436	1.44688	0.877226	2370.13	28.6955	2461.65	15.266	2538.11	13.2806	2538.11	13.2806	93.3816
-PENN J-2 Spot 116	146.443	31800	2.09306	5.91492	0.835976	11.0462	1.60897	0.474079	1.37474	0.854426	2501.42	28.5018	2527.04	14.982	2547.66	14.0049	2547.66	14.0049	98.1853
-PENN J-2 Spot 208	510.689	43707.9	2.6941	5.7545	0.88448	9.9803	1.87302	0.416715	1.65103	0.88148	2245.55	31.3064	2432.96	17.2879	2593.62	14.7514	2593.62	14.7514	86.5798
-PENN J-2 Spot 58	328.106	60910.6	2.30352	5.75217	1.04293	11.9088	1.59646	0.497035	1.20871	0.757119	2601.04	25.8701	2597.26	14.9555	2594.3	17.3937	2594.3	17.3937	100.26
-PENN J-2 Spot 248	390.037	149827	0.3301	5.60183	0.820879	11.1713	1.36664	0.45407	1.09264	0.799507	2413.32	21.9954	2537.53	12.7372	2638.37	13.6316	2638.37	13.6316	91.4701
-PENN J-2 Spot 307	200.888	98474.6	1.49949	5.58959	0.833106	11.2807	1.95587	0.457513	1.76957	0.904746	2428.57	35.808	2546.61	18.2444	2642	13.8299	2642	13.8299	91.9216
-PENN J-2 Spot 60	299.334	46758.9	0.493624	5.58824	0.786576	10.2562	1.93714	0.415863	1.77025	0.913851	2241.67	33.5187	2458.16	17.9238	2642.4	13.0568	2642.4	13.0568	84.8348
-PENN J-2 Spot 144	50.7859	22914.9	2.08725	5.46397	1.10355	12.0098	1.79332	0.476137	1.41356	0.788239	2510.42	29.3928	2605.17	16.8109	2679.67	18.2553	2679.67	18.2553	93.6838
-PENN J-2 Spot 135	233.406	38794.4	0.894058	5.43916	0.708381	13.1238	1.27341	0.51794	1.05819	0.830991	2690.44	23.276	2688.59	12.0151	2687.2	11.7086	2687.2	11.7086	100.121
-PENN J-2 Spot 309	139.098	49954.9	1.79716	5.27082	0.907966	12.2352	1.76852	0.467927	1.51765	0.858146	2474.46	31.1865	2622.62	16.6019	2739.04	14.9362	2739.04	14.9362	90.3406
-PENN J-2 Spot 131	271.235	78025.4	1.65561	5.17483	0.549349	14.0077	1.10406	0.525958	0.957688	0.867423	2724.4	21.279	2750.23	10.4638	2769.23	9.01359	2769.23	9.01359	98.3809
-PENN J-2 Spot 175	498.879	480512	12.2341	4.9012	0.671563	14.994	1.66782	0.533223	1.52664	0.91535	2755.02	34.2264	2814.86	15.8772	2858	10.9312	2858	10.9312	96.3966
-PENN J-2 Spot 149	99.7827	45044	1.94468	4.89901	0.71433	15.3204	1.14565	0.544584	0.895684	0.781812	2802.61	20.3577	2835.37	10.9204	2858.73	11.6265	2858.73	11.6265	98.0369
-PENN J-2 Spot 306	363.687	111843	1.32131	4.85762	0.955415	15.7736	1.62971	0.555957	1.32028	0.810131	2849.9	30.411	2863.18	15.5625	2872.53	15.5277	2872.53	15.5277	99.2123
-PENN J-2 Spot 109	633.692	722292	7.34919	4.82002	0.825891	14.1408	1.9541	0.494551	1.77099	0.906295	2590.33	37.778	2759.19	18.5332	2885.15	13.4073	2885.15	13.4073	89.7818
PennJ3							Isotope ratios						Apparent ages (Ma)
Analysis	U	206Pb	U/Th	206Pb*	±	207Pb*	±	206Pb*	±	error	206Pb*	±	207Pb*	±	206Pb*	±	Best age	±	Conc
	(ppm)	204Pb		207Pb*	(%)	235U*	(%)	238U	(%)	corr.	238U*	(Ma)	235U	(Ma)	207Pb*	(Ma)	(Ma)	(Ma)	(%)
-PENN J-3 Spot 152	930.764	1327.99	3.11522	11.6423	1.93096	0.695087	2.26859	0.0587173	1.19076	0.52489	367.82	4.25726	535.852	9.44597	1334.93	37.3455	367.82	4.25726	NA
-PENN J-3 Spot 37	297.18	5110.72	1.68435	16.8371	1.84382	0.504624	2.38561	0.0616484	1.51375	0.634534	385.643	5.66647	414.828	8.12415	580.561	40.0445	385.643	5.66647	NA
-PENN J-3 Spot 139	644.013	5371.47	1.37584	15.5742	3.64962	0.570822	3.83761	0.0645051	1.1864	0.30915	402.966	4.63442	458.546	14.161	747.575	77.1213	402.966	4.63442	53.9031
-PENN J-3 Spot 158	949.84	34882.6	1.77382	18.4139	0.607478	0.482998	1.1895	0.0645327	1.02268	0.859759	403.133	3.99651	400.128	3.93371	382.791	13.6529	403.133	3.99651	105.314
-PENN J-3 Spot 58	508.612	15160	1.81306	18.5127	0.843133	0.480588	1.42792	0.0645551	1.15242	0.807064	403.268	4.50496	398.476	4.70624	370.756	18.9888	403.268	4.50496	108.769
-PENN J-3 Spot 25	189.259	6001.04	1.16997	18.5654	2.06427	0.482738	2.27622	0.0650285	0.959151	0.421378	406.134	3.77527	399.95	7.52489	364.35	46.5472	406.134	3.77527	111.468
-PENN J-3 Spot 73	253.95	13416.6	2.22929	18.1723	0.860071	0.49657	1.37923	0.0654753	1.07822	0.781754	408.838	4.27129	409.378	4.64679	412.4	19.2298	408.838	4.27129	99.1362
-PENN J-3 Spot 113	180.13	6809.4	0.931345	19.1559	1.82258	0.472895	2.05372	0.0657286	0.946555	0.460899	410.371	3.76333	393.187	6.6953	293.335	41.6162	410.371	3.76333	139.898
-PENN J-3 Spot 91	330.602	81380.5	2.52536	18.1279	1.00774	0.500829	1.78599	0.0658757	1.47452	0.825604	411.26	5.87473	412.264	6.05163	417.865	22.5091	411.26	5.87473	98.4195
-PENN J-3 Spot 67	164.935	5740.09	1.703	18.8815	1.50666	0.483838	1.88282	0.0662863	1.12915	0.599712	413.743	4.525	400.703	6.23386	326.2	34.1935	413.743	4.525	126.837
-PENN J-3 Spot 284	47.2414	2437.28	2.53793	15.8211	4.62034	0.577518	4.69227	0.0662963	0.818405	0.174416	413.803	3.28018	462.865	17.444	714.268	98.2279	413.803	3.28018	57.9338
-PENN J-3 Spot 86	498.878	31006.2	1.19039	18.2162	0.629318	0.501735	1.52831	0.0663163	1.39273	0.911287	413.924	5.58367	412.876	5.18474	406.999	14.0831	413.924	5.58367	101.701
-PENN J-3 Spot 123	1221.76	7689.73	6.28868	16.4197	0.864642	0.55671	1.33101	0.0663258	1.01191	0.760263	413.982	4.05746	449.383	4.8332	634.874	18.6175	413.982	4.05746	65.2069
-PENN J-3 Spot 271	379.025	30375.8	0.855721	17.959	0.806948	0.511982	1.77137	0.0667151	1.57689	0.89021	416.335	6.35765	419.781	6.0905	438.739	17.9806	416.335	6.35765	94.8936
-PENN J-3 Spot 128	240.49	34183.2	2.16163	18.2666	0.986424	0.504413	1.31778	0.0668546	0.873787	0.663076	417.178	3.5298	414.685	4.48635	400.815	22.0993	417.178	3.5298	104.082
-PENN J-3 Spot 258	330.525	32805.6	1.57464	16.8715	0.980879	0.547541	1.37225	0.0670285	0.959655	0.699331	418.228	3.88612	443.384	4.92992	576.154	21.3101	418.228	3.88612	72.5897
-PENN J-3 Spot 266	85.6335	1984.58	1.79194	20.5693	1.57244	0.449626	1.99003	0.0671054	1.2197	0.612902	418.693	4.94447	377.017	6.26745	128.364	36.9802	418.693	4.94447	326.177
-PENN J-3 Spot 109	120.741	10954.2	0.884392	18.172	1.34995	0.512147	1.58459	0.0675283	0.829792	0.523663	421.247	3.38372	419.892	5.44944	412.433	30.1825	421.247	3.38372	102.137
-PENN J-3 Spot 138	107.523	4938.15	2.26681	18.8393	1.59449	0.496414	1.8154	0.0678574	0.867907	0.478081	423.234	3.55529	409.272	6.11504	331.256	36.1492	423.234	3.55529	127.766
-PENN J-3 Spot 229	312.691	39049.1	3.48512	17.7178	0.980436	0.527865	1.63006	0.0678609	1.30225	0.798894	423.256	5.33479	430.392	5.71843	468.776	21.7066	423.256	5.33479	90.2896
-PENN J-3 Spot 36	19.282	2929.05	1.40241	18.931	4.52539	0.494971	4.6604	0.0679892	1.11363	0.238957	424.03	4.57019	408.292	15.6687	320.258	102.872	424.03	4.57019	132.403
-PENN J-3 Spot 51	219.601	12837	2.60397	17.8457	1.13264	0.525654	1.80623	0.0680646	1.40698	0.778961	424.485	5.78003	428.921	6.31905	452.805	25.146	424.485	5.78003	93.7456
-PENN J-3 Spot 249	712.489	4314.01	2.62256	15.2257	2.2177	0.620173	2.57476	0.0685136	1.30813	0.508058	427.194	5.40711	489.956	10.0076	795.216	46.5229	427.194	5.40711	53.7206
-PENN J-3 Spot 30	686.723	79097.5	2.15042	18.0578	0.688974	0.523975	1.41532	0.0686538	1.2363	0.873515	428.04	5.12001	427.804	4.94107	426.509	15.3655	428.04	5.12001	100.359
-PENN J-3 Spot 289	306.189	153728	0.697043	17.9831	0.961364	0.529545	1.69013	0.0690965	1.39008	0.822469	430.71	5.79159	431.508	5.9415	435.747	21.4181	430.71	5.79159	98.8442
-PENN J-3 Spot 176	423.046	14238.9	1.75848	18.2683	0.793266	0.527764	1.43522	0.0699559	1.19607	0.833371	435.89	5.0412	430.324	5.03425	400.612	17.772	435.89	5.0412	108.806
-PENN J-3 Spot 216	310.369	20885.2	2.00665	17.8191	0.789113	0.541426	1.3119	0.0700024	1.04803	0.798868	436.17	4.41998	439.365	4.67895	456.134	17.5307	436.17	4.41998	95.6231
-PENN J-3 Spot 115	214.257	7390.29	2.08156	18.4516	1.92164	0.528751	2.11636	0.0707901	0.886719	0.418984	440.914	3.77896	430.98	7.43261	378.199	43.2181	440.914	3.77896	116.583
-PENN J-3 Spot 49	509.978	33878.5	1.60975	17.6394	0.720492	0.556826	1.33855	0.0712673	1.1281	0.842777	443.786	4.8379	449.458	4.86124	478.565	15.9253	443.786	4.8379	92.7326
-PENN J-3 Spot 248	601.276	6471.58	1.4413	16.0924	2.4373	0.613648	2.8358	0.0716521	1.4496	0.511178	446.102	6.24802	485.858	10.9505	678.012	52.1179	446.102	6.24802	65.7955
-PENN J-3 Spot 225	446.774	57839.2	1.20569	17.9856	0.66528	0.550755	1.22593	0.0718738	1.02971	0.839942	447.435	4.45101	445.491	4.42091	435.446	14.8147	447.435	4.45101	102.753
-PENN J-3 Spot 223	473.149	14649	1.74105	17.896	0.693424	0.558276	1.60741	0.0724923	1.45015	0.902165	451.154	6.31872	450.404	5.84745	446.558	15.4335	451.154	6.31872	101.029
-PENN J-3 Spot 200	663.781	26062.6	3.3344	17.2527	1.03657	0.579849	1.74358	0.0725871	1.402	0.804092	451.723	6.11635	464.365	6.49796	527.392	22.7234	451.723	6.11635	85.6522
-PENN J-3 Spot 101	529.842	3289.22	4.83753	12.0646	4.71936	0.829334	4.82136	0.0725991	0.986463	0.204603	451.795	4.3042	613.243	22.1975	1265.72	92.1933	451.795	4.3042	35.6946
-PENN J-3 Spot 193	62.3381	31598.9	1.05041	17.7774	1.27648	0.566223	1.64865	0.0730372	1.04339	0.632873	454.428	4.57818	455.569	6.05198	461.307	28.2981	454.428	4.57818	98.5088
-PENN J-3 Spot 221	270.936	71117.5	1.34242	17.545	0.822353	0.574264	1.38004	0.0731058	1.10826	0.803065	454.84	4.86709	460.769	5.11162	490.413	18.1554	454.84	4.86709	92.7464
-PENN J-3 Spot 240	110.961	5837.54	0.871411	18.7547	1.5132	0.537332	1.69735	0.0731206	0.768917	0.453009	454.929	3.37745	436.664	6.02397	341.465	34.258	454.929	3.37745	133.229
-PENN J-3 Spot 313	385.616	4932.38	0.755713	14.2291	4.23656	0.717801	4.43706	0.0741086	1.31876	0.297214	460.861	5.86547	549.368	18.8281	935.621	86.9299	460.861	5.86547	49.2573
-PENN J-3 Spot 215	212.663	8893.56	0.892479	18.1121	1.43064	0.56583	1.79206	0.0743607	1.07923	0.602231	462.374	4.81534	455.314	6.57551	419.808	31.9459	462.374	4.81534	110.139
-PENN J-3 Spot 93	1126.5	22278.3	2.00829	16.5336	1.10042	0.619922	1.46342	0.0743691	0.964719	0.659222	462.424	4.30485	489.798	5.68652	619.934	23.7462	462.424	4.30485	74.5925
-PENN J-3 Spot 163	168.004	154005	0.915142	17.5792	0.97051	0.585166	1.51658	0.074639	1.16539	0.768432	464.044	5.21786	467.776	5.68467	486.143	21.4305	464.044	5.21786	95.4541
-PENN J-3 Spot 53	359.376	35511.3	2.05866	17.6906	0.778167	0.581486	1.64483	0.0746398	1.44911	0.88101	464.048	6.48826	465.416	6.14088	472.189	17.2209	464.048	6.48826	98.276
-PENN J-3 Spot 133	281.185	16861	0.920763	17.6519	0.836958	0.588211	1.27304	0.0753376	0.959237	0.7535	468.233	4.33223	469.725	4.78741	477	18.5081	468.233	4.33223	98.1621
-PENN J-3 Spot 305	121.793	33888.4	2.21601	17.0349	1.53947	0.623394	2.19539	0.0770529	1.56517	0.712934	478.508	7.21823	491.973	8.56032	555.176	33.6064	478.508	7.21823	86.1903
-PENN J-3 Spot 226	211.735	101458	1.55678	17.5649	0.750238	0.619166	0.98776	0.0789115	0.642505	0.650466	489.622	3.02935	489.324	3.8353	487.931	16.5385	489.622	3.02935	100.347
-PENN J-3 Spot 120	27.1353	1443.37	1.09293	20.6409	2.1072	0.545479	2.33158	0.0816947	0.997985	0.428029	506.23	4.85883	442.03	8.35614	120.17	49.6493	506.23	4.85883	421.26
-PENN J-3 Spot 179	290.549	13230.7	1.51121	16.7313	1.21684	0.676028	1.78118	0.0820697	1.30073	0.730264	508.465	6.35966	524.371	7.29505	594.264	26.3509	508.465	6.35966	85.5621
-PENN J-3 Spot 65	99.3507	5160.04	1.27607	17.865	0.975503	0.667446	1.4467	0.0865182	1.06833	0.738462	534.912	5.48398	519.159	5.88001	450.402	21.6883	534.912	5.48398	118.763
-PENN J-3 Spot 2	130.271	6167.24	5.7114	16.1276	1.17239	0.756498	1.70298	0.0885251	1.23517	0.725298	546.808	6.47548	571.988	7.44744	673.352	25.0691	546.808	6.47548	81.2069
-PENN J-3 Spot 107	144.203	32941.5	1.33833	16.4166	0.910029	0.759425	1.28771	0.0904598	0.911063	0.707508	558.256	4.87206	573.678	5.64372	635.282	19.6085	558.256	4.87206	87.8752
-PENN J-3 Spot 299	65.6769	3593.45	0.994033	15.253	3.78663	0.854037	3.94557	0.0945194	1.10861	0.280975	582.21	6.17155	626.862	18.4564	791.448	79.4557	582.21	6.17155	73.5627
-PENN J-3 Spot 244	71.6648	24671.6	2.16489	16.4035	1.22235	0.827106	1.5425	0.0984434	0.940831	0.609938	605.28	5.43549	612.005	7.09023	636.994	26.3239	605.28	5.43549	95.0213
-PENN J-3 Spot 196	626.046	23335.6	1.04488	16.3549	0.919904	0.831137	1.47984	0.0986298	1.15918	0.783315	606.374	6.7085	614.243	6.82028	643.379	19.7942	606.374	6.7085	94.2482
-PENN J-3 Spot 166	328.643	48827.5	1.17342	16.2839	0.651583	0.885101	1.25075	0.104578	1.06763	0.853586	641.18	6.51599	643.734	5.963	652.702	13.9746	641.18	6.51599	98.2346
-PENN J-3 Spot 187	509.825	57527.9	0.923192	16.1317	0.605658	0.929642	1.22514	0.108814	1.06496	0.869257	665.855	6.73715	667.447	5.99319	672.845	12.9665	665.855	6.73715	98.9611
-PENN J-3 Spot 127	390.624	48843.9	7.2465	15.1438	0.665134	1.1789	1.31165	0.129538	1.1305	0.86189	785.231	8.35769	790.801	7.20602	806.515	13.9418	785.231	8.35769	97.3611
-PENN J-3 Spot 206	246.842	18710.1	3.78611	14.8949	0.826689	1.24587	1.63026	0.134647	1.40511	0.861893	814.324	10.7489	821.541	9.18306	841.15	17.1955	814.324	10.7489	96.8108
-PENN J-3 Spot 159	73.1692	6954.33	3.05001	14.6083	1.26884	1.45649	1.47775	0.154381	0.757494	0.512599	925.474	6.53043	912.558	8.89681	881.462	26.2456	881.462	26.2456	104.993
-PENN J-3 Spot 81	90.5342	7995.85	4.39434	14.4079	0.918967	1.50774	1.47794	0.157621	1.1575	0.783184	943.544	10.1598	933.526	9.02281	909.931	18.924	909.931	18.924	103.694
-PENN J-3 Spot 106	351.196	288661	5.57066	14.1976	0.602876	1.54979	1.58289	0.159653	1.46358	0.924628	954.847	12.9893	950.411	9.76927	940.174	12.3438	940.174	12.3438	101.561
-PENN J-3 Spot 228	293.952	34604	5.64087	14.1871	0.612652	1.53246	1.23396	0.15775	1.07113	0.868041	944.262	9.4084	943.484	7.58203	941.672	12.5545	941.672	12.5545	100.275
-PENN J-3 Spot 197	153.403	516835	3.51048	14.1857	0.672433	1.4948	1.15075	0.153858	0.93384	0.811506	922.554	8.0271	928.272	7.00107	941.879	13.7589	941.879	13.7589	97.9482
-PENN J-3 Spot 283	54.2403	9698.84	1.91304	14.1184	1.13058	1.54418	1.50693	0.158187	0.996304	0.661148	946.695	8.77209	948.174	9.2872	951.605	23.1311	951.605	23.1311	99.484
-PENN J-3 Spot 134	104.348	10543.2	1.54676	14.1061	0.883014	1.55508	1.30853	0.159165	0.965682	0.737989	952.135	8.54781	952.514	8.08671	953.372	18.07	953.372	18.07	99.8703
-PENN J-3 Spot 252	78.3159	17152.6	3.13054	14.0131	0.916749	1.60036	1.35534	0.16272	0.998255	0.736536	971.873	9.00586	970.35	8.46977	966.884	18.7186	966.884	18.7186	100.516
-PENN J-3 Spot 154	76.545	281160	3.41108	14.0042	0.721787	1.5352	1.14523	0.155994	0.889142	0.776388	934.479	7.73469	944.583	7.04177	968.209	14.7296	968.209	14.7296	96.5162
-PENN J-3 Spot 232	55.2737	6458.29	0.587567	14.0019	0.832539	1.60004	1.43519	0.162558	1.16904	0.814554	970.976	10.5376	970.227	8.96816	968.551	16.9899	968.551	16.9899	100.25
-PENN J-3 Spot 292	454.029	67126.7	1.66807	13.9878	0.738622	1.61349	1.48147	0.163759	1.28421	0.866848	977.63	11.6492	975.464	9.28711	970.57	15.0871	970.57	15.0871	100.727
-PENN J-3 Spot 268	57.4747	5.50014e+06	3.21305	13.9539	0.852822	1.52339	1.33141	0.154239	1.02242	0.767924	924.684	8.80739	939.841	8.16163	975.554	17.3744	975.554	17.3744	94.7856
-PENN J-3 Spot 312	80.0078	35005.9	1.46985	13.9416	0.777983	1.62237	1.33756	0.164116	1.08803	0.813445	979.609	9.88814	978.908	8.40252	977.314	15.8346	977.314	15.8346	100.235
-PENN J-3 Spot 295	31.7744	5467.73	1.10127	13.875	1.02889	1.70341	1.50667	0.17149	1.10065	0.73052	1020.32	10.3865	1009.81	9.63979	987.083	20.9217	987.083	20.9217	103.367
-PENN J-3 Spot 309	110.323	31084.9	1.00358	13.8553	0.679549	1.62577	1.26002	0.163441	1.06107	0.842103	975.873	9.609	980.224	7.9217	989.964	13.8054	989.964	13.8054	98.5766
-PENN J-3 Spot 256	306.507	960264	2.22201	13.853	0.719555	1.60191	1.31679	0.161016	1.1028	0.837493	962.42	9.85929	970.955	8.23191	990.304	14.6242	990.304	14.6242	97.1842
-PENN J-3 Spot 31	147.067	8449.69	3.07238	13.8228	0.750404	1.67806	1.28085	0.168302	1.03801	0.81041	1002.75	9.63953	1000.24	8.14938	994.757	15.2322	994.757	15.2322	100.803
-PENN J-3 Spot 243	26.7579	10205.9	6.00247	13.8179	1.51874	1.57234	1.83879	0.157643	1.03662	0.563752	943.665	9.09993	959.349	11.4129	995.459	30.8473	995.459	30.8473	94.797
-PENN J-3 Spot 189	67.967	12359.4	0.904894	13.8089	0.837906	1.63855	1.20322	0.164175	0.863507	0.717665	979.938	7.85007	985.155	7.58711	996.777	17.0059	996.777	17.0059	98.3107
-PENN J-3 Spot 60	605.028	33873.8	4.5663	13.7846	0.548766	1.56519	1.47678	0.156549	1.37103	0.928394	937.573	11.9634	956.526	9.14965	1000.35	11.1242	1000.35	11.1242	93.7242
-PENN J-3 Spot 211	197.06	20170.3	2.72716	13.76	0.578305	1.67644	1.17429	0.167376	1.02202	0.870328	997.639	9.44627	999.633	7.46868	1003.99	11.7186	1003.99	11.7186	99.3673
-PENN J-3 Spot 85	579.079	134980	3.90074	13.7378	0.62364	1.6974	1.52215	0.169196	1.38852	0.912215	1007.68	12.9532	1007.55	9.72609	1007.26	12.6516	1007.26	12.6516	100.042
-PENN J-3 Spot 92	557.29	45331.8	5.9627	13.7364	0.711978	1.6011	1.34186	0.159581	1.13739	0.847628	954.445	10.0904	970.639	8.38701	1007.46	14.4268	1007.46	14.4268	94.7373
-PENN J-3 Spot 136	214.852	24402.1	2.69741	13.7357	0.645368	1.73797	1.41004	0.173212	1.25368	0.88911	1029.79	11.9319	1022.71	9.0884	1007.58	13.0765	1007.58	13.0765	102.204
-PENN J-3 Spot 214	100.57	35203.8	3.0892	13.7288	0.740051	1.70046	1.13651	0.16939	0.862549	0.758942	1008.75	8.05435	1008.7	7.26676	1008.59	15.0099	1008.59	15.0099	100.016
-PENN J-3 Spot 199	208.359	49561	7.24004	13.7223	0.633286	1.70941	1.13516	0.170201	0.94209	0.829919	1013.22	8.83309	1012.06	7.27219	1009.55	12.8428	1009.55	12.8428	100.364
-PENN J-3 Spot 8	17.991	3834.67	1.62135	13.7128	2.75748	1.77494	3.04567	0.176603	1.29321	0.424606	1048.39	12.5128	1036.33	19.7833	1010.96	55.9358	1010.96	55.9358	103.703
-PENN J-3 Spot 122	384.466	165692	1.28785	13.6947	0.649371	1.74064	1.43778	0.172961	1.28278	0.892196	1028.41	12.1938	1023.7	9.2724	1013.63	13.1601	1013.63	13.1601	101.457
-PENN J-3 Spot 257	57.8397	7830.97	1.72839	13.6679	0.977005	1.69988	1.30308	0.168581	0.862257	0.661705	1004.29	8.01872	1008.49	8.33078	1017.6	19.7894	1017.6	19.7894	98.6917
-PENN J-3 Spot 277	32.155	6694.46	1.40534	13.6237	1.8972	1.71647	2.42657	0.169676	1.51291	0.623475	1010.32	14.1477	1014.71	15.57	1024.16	38.3917	1024.16	38.3917	98.6492
-PENN J-3 Spot 280	32.1086	14345.3	4.97412	13.6193	1.16201	1.77819	1.51023	0.17572	0.964645	0.63874	1043.55	9.29402	1037.52	9.8153	1024.81	23.529	1024.81	23.529	101.829
-PENN J-3 Spot 173	376.44	48976.7	8.61658	13.6173	0.797598	1.80004	1.60256	0.177853	1.38998	0.867348	1055.24	13.53	1045.47	10.4611	1025.11	16.136	1025.11	16.136	102.939
-PENN J-3 Spot 75	88.7005	16400.3	6.21293	13.6153	0.875792	1.78092	1.3524	0.175938	1.03052	0.761993	1044.74	9.93911	1038.51	8.79428	1025.41	17.7364	1025.41	17.7364	101.886
-PENN J-3 Spot 48	68.7641	19475.7	1.84412	13.6086	0.818375	1.67577	1.27921	0.165469	0.983183	0.768584	987.098	8.99847	999.377	8.13482	1026.4	16.5726	1026.4	16.5726	96.1712
-PENN J-3 Spot 273	82.9757	51998.4	1.6767	13.5988	0.780288	1.69291	1.29026	0.16704	1.02758	0.796413	995.783	9.48131	1005.86	8.23622	1027.86	15.7997	1027.86	15.7997	96.8788
-PENN J-3 Spot 186	86.6953	31240.8	3.11127	13.5932	0.681228	1.8016	1.13679	0.177691	0.910061	0.800556	1054.35	8.85163	1046.04	7.42281	1028.7	13.7736	1028.7	13.7736	102.493
-PENN J-3 Spot 56	76.3268	54675	3.11105	13.5754	0.89228	1.71115	1.23869	0.16855	0.859172	0.693616	1004.12	7.98877	1012.72	7.93843	1031.35	18.0535	1031.35	18.0535	97.3598
-PENN J-3 Spot 177	37.6236	31117.2	0.777809	13.5748	0.910509	1.6811	1.33258	0.165583	0.973008	0.730168	987.727	8.9106	1001.4	8.48426	1031.43	18.4226	1031.43	18.4226	95.7629
-PENN J-3 Spot 281	232.15	41350.8	2.8004	13.5608	0.708018	1.73678	1.16857	0.170891	0.929659	0.795553	1017.02	8.7467	1022.27	7.53004	1033.51	14.325	1033.51	14.325	98.4043
-PENN J-3 Spot 278	127.587	23055.6	2.50361	13.5575	0.766846	1.71354	1.11031	0.168563	0.802961	0.723183	1004.19	7.46659	1013.61	7.11936	1034.01	15.5116	1034.01	15.5116	97.1163
-PENN J-3 Spot 167	190.422	37307.4	3.0971	13.5312	0.562802	1.74988	1.1451	0.171804	0.997253	0.870885	1022.04	9.42547	1027.12	7.39907	1037.93	11.3825	1037.93	11.3825	98.4698
-PENN J-3 Spot 114	205.147	29595.2	156.566	13.5229	0.73606	1.79944	1.18264	0.176561	0.925658	0.782708	1048.16	8.95465	1045.25	7.7189	1039.17	14.879	1039.17	14.879	100.865
-PENN J-3 Spot 314	176.188	27034.5	3.72846	13.4875	0.574535	1.85705	1.01196	0.181737	0.833052	0.823205	1076.46	8.25872	1065.94	6.67891	1044.49	11.6086	1044.49	11.6086	103.06
-PENN J-3 Spot 219	581.042	81977.7	5.22669	13.4554	0.740601	1.73141	1.36607	0.169038	1.14789	0.840288	1006.81	10.6998	1020.27	8.79279	1049.3	14.9484	1049.3	14.9484	95.9509
-PENN J-3 Spot 269	381.731	299755	1.54168	13.4518	0.635734	1.79714	1.39886	0.175408	1.24606	0.890765	1041.84	11.9872	1044.42	9.12609	1049.84	12.8329	1049.84	12.8329	99.2379
-PENN J-3 Spot 145	132.621	10637	2.63114	13.4238	0.85131	1.89747	1.3874	0.184814	1.09551	0.789617	1093.22	11.016	1080.2	9.2257	1054.05	17.1668	1054.05	17.1668	103.717
-PENN J-3 Spot 126	80.4679	211805	0.782864	13.4161	0.551537	1.78701	1.05212	0.173957	0.895972	0.851586	1033.87	8.55858	1040.74	6.85	1055.19	11.1069	1055.19	11.1069	97.9795
-PENN J-3 Spot 303	840.666	70838.2	4.38438	13.398	0.615461	1.73691	1.31054	0.168851	1.15703	0.882866	1005.78	10.7747	1022.32	8.44511	1057.92	12.3898	1057.92	12.3898	95.0712
-PENN J-3 Spot 90	72.3559	20191.4	1.11455	13.3813	0.753637	1.86112	1.08411	0.180701	0.779317	0.718852	1070.8	7.68871	1067.38	7.16062	1060.42	15.1618	1060.42	15.1618	100.979
-PENN J-3 Spot 61	101.635	17663.9	2.8521	13.3452	0.831469	1.73222	1.28267	0.167732	0.976673	0.76144	999.601	9.04357	1020.58	8.25734	1065.86	16.7188	1065.86	16.7188	93.7834
-PENN J-3 Spot 108	188.363	14523.1	3.75888	13.3427	0.920516	1.85337	1.49819	0.17943	1.18204	0.788979	1063.86	11.5924	1064.63	9.88129	1066.23	18.4958	1066.23	18.4958	99.7772
-PENN J-3 Spot 77	69.2728	24169	1.39414	13.336	0.968667	1.78434	1.35785	0.172659	0.951542	0.700773	1026.74	9.03158	1039.76	8.83581	1067.25	19.4551	1067.25	19.4551	96.2049
-PENN J-3 Spot 64	150.824	19797.3	3.9563	13.326	0.674601	1.80775	1.15546	0.174793	0.938086	0.811871	1038.47	8.99756	1048.26	7.55393	1068.75	13.5585	1068.75	13.5585	97.1663
-PENN J-3 Spot 68	793.685	155801	39.0507	13.2872	0.607224	1.90256	1.33356	0.183425	1.18729	0.890317	1085.66	11.863	1081.98	8.87586	1074.61	12.1938	1074.61	12.1938	101.028
-PENN J-3 Spot 59	109.552	11532.5	11.5723	13.2871	0.773379	1.97624	1.24855	0.190528	0.980184	0.785058	1124.23	10.1122	1107.44	8.41817	1074.62	15.5126	1074.62	15.5126	104.617
-PENN J-3 Spot 194	122.688	37984.7	3.32927	13.2445	0.902658	1.85175	1.35203	0.177953	1.00658	0.744493	1055.78	9.80265	1064.05	8.91455	1081.04	18.0904	1081.04	18.0904	97.6636
-PENN J-3 Spot 218	78.774	21796.6	1.76878	13.196	0.672917	1.88867	1.13882	0.180835	0.918745	0.806752	1071.54	9.07001	1077.11	7.5605	1088.39	13.4779	1088.39	13.4779	98.4513
-PENN J-3 Spot 238	483.246	19708.9	1.35514	13.1521	0.534491	1.87432	1.30157	0.178865	1.18676	0.911793	1060.77	11.6076	1072.06	8.61819	1095.07	10.689	1095.07	10.689	96.8681
-PENN J-3 Spot 148	229.893	20846.3	2.36651	13.148	0.708906	1.97267	1.15299	0.188192	0.909304	0.78865	1111.57	9.28413	1106.22	7.7691	1095.69	14.1904	1095.69	14.1904	101.449
-PENN J-3 Spot 160	176.77	39405.8	2.80374	13.0963	0.677411	2.02827	1.10943	0.192735	0.878603	0.791943	1136.17	9.15226	1125.04	7.54515	1103.61	13.5641	1103.61	13.5641	102.951
-PENN J-3 Spot 7	713.093	34427.1	1.82342	13.0712	0.714442	1.85559	1.67262	0.175989	1.51236	0.904186	1045.02	14.59	1065.42	11.0365	1107.4	14.2579	1107.4	14.2579	94.367
-PENN J-3 Spot 34	178.416	19567.6	3.0211	13.0614	0.680296	1.90804	1.14066	0.180828	0.915585	0.802682	1071.5	9.0385	1083.9	7.59942	1108.9	13.5956	1108.9	13.5956	96.6269
-PENN J-3 Spot 95	346.973	39583.7	2.73044	12.9719	0.498528	2.04634	1.18346	0.192606	1.07333	0.906946	1135.48	11.1745	1131.08	8.0722	1122.62	9.9397	1122.62	9.9397	101.145
-PENN J-3 Spot 135	127.197	34230.6	56.0646	12.9655	1.01332	2.1274	1.51295	0.200136	1.12347	0.742573	1176.05	12.0775	1157.74	10.4504	1123.64	20.1941	1123.64	20.1941	104.665
-PENN J-3 Spot 201	457.003	16064.2	2.08345	12.9598	0.68133	1.87148	1.56924	0.175983	1.41361	0.900827	1044.99	13.637	1071.06	10.3852	1124.49	13.5934	1124.49	13.5934	92.9301
-PENN J-3 Spot 242	32.3303	6761.08	2.87865	12.9502	1.05272	1.99919	1.44309	0.187852	0.987064	0.683994	1109.73	10.0628	1115.24	9.76757	1126.01	20.9949	1126.01	20.9949	98.5543
-PENN J-3 Spot 98	33.2711	34969.7	2.27275	12.9395	0.79541	2.02879	1.24954	0.190477	0.963677	0.771225	1123.96	9.93965	1125.21	8.49882	1127.65	15.8658	1127.65	15.8658	99.6723
-PENN J-3 Spot 204	111.327	29938.5	4.59422	12.9259	0.662487	1.97768	1.25738	0.185483	1.06869	0.849939	1096.86	10.7791	1107.93	8.47975	1129.74	13.195	1129.74	13.195	97.0893
-PENN J-3 Spot 276	86.0574	41891.1	3.28862	12.9241	0.773854	2.0875	1.26056	0.195756	0.995072	0.789387	1152.48	10.5013	1144.7	8.65415	1130.02	15.4038	1130.02	15.4038	101.987
-PENN J-3 Spot 302	61.9666	15998.1	2.12834	12.9149	0.946355	1.99539	1.39301	0.186985	1.0222	0.733805	1105.02	10.3804	1113.95	9.4226	1131.4	18.8444	1131.4	18.8444	97.6685
-PENN J-3 Spot 6	130.346	17669.6	1.3745	12.9059	1.11118	1.74708	1.5197	0.163603	1.03671	0.682181	976.768	9.39644	1026.09	9.81396	1132.78	22.1232	1132.78	22.1232	86.2272
-PENN J-3 Spot 33	68.7293	21186.6	2.42233	12.9031	0.781403	2.02658	1.17758	0.189735	0.880964	0.748116	1119.94	9.05677	1124.47	8.00645	1133.22	15.5463	1133.22	15.5463	98.8279
-PENN J-3 Spot 132	163.157	21097.8	5.48741	12.8801	0.772142	1.98698	1.36069	0.185695	1.12039	0.823399	1098.01	11.3114	1111.1	9.19099	1136.8	15.3636	1136.8	15.3636	96.588
-PENN J-3 Spot 175	797.623	87741.7	4.66728	12.8762	0.73524	2.05178	1.34396	0.191693	1.12501	0.837086	1130.54	11.6658	1132.89	9.17498	1137.41	14.627	1137.41	14.627	99.3957
-PENN J-3 Spot 9	127.139	23937.3	2.2689	12.8744	0.84511	2.06897	1.31328	0.193272	1.00523	0.765436	1139.07	10.4957	1138.59	8.98998	1137.65	16.8072	1137.65	16.8072	100.125
-PENN J-3 Spot 261	79.7074	32822.2	1.70741	12.866	0.713116	2.01184	1.42902	0.187813	1.23838	0.866589	1109.52	12.6226	1119.51	9.69268	1138.95	14.1836	1138.95	14.1836	97.416
-PENN J-3 Spot 149	78.5318	30420.5	3.63493	12.8527	0.818174	2.01049	1.27302	0.187493	0.975282	0.766116	1107.78	9.92665	1119.06	8.63259	1141.04	16.2695	1141.04	16.2695	97.0853
-PENN J-3 Spot 184	206.205	50727.4	2.66646	12.8482	0.651664	2.0435	1.43779	0.190504	1.28163	0.891389	1124.11	13.2208	1130.13	9.8026	1141.7	12.9382	1141.7	12.9382	98.4588
-PENN J-3 Spot 151	192.901	45342.1	4.04333	12.8465	1.35754	1.95236	1.95252	0.181984	1.40337	0.718746	1077.8	13.9287	1099.26	13.1111	1141.96	26.9906	1141.96	26.9906	94.3818
-PENN J-3 Spot 29	243.925	149446	1.01498	12.8236	0.715574	1.92863	1.43411	0.179451	1.24283	0.866622	1063.97	12.1898	1091.06	9.58983	1145.52	14.2203	1145.52	14.2203	92.8814
-PENN J-3 Spot 236	765.906	43393.4	4.90363	12.8213	0.617656	2.07318	1.37115	0.192867	1.22416	0.892794	1136.89	12.7592	1139.98	9.39242	1145.86	12.2549	1145.86	12.2549	99.2167
-PENN J-3 Spot 307	337.818	108190	3.81266	12.8056	0.615781	2.13647	1.33574	0.198511	1.18534	0.887399	1167.31	12.6562	1160.68	9.23892	1148.35	12.2122	1148.35	12.2122	101.652
-PENN J-3 Spot 5	293.406	293778	2.84363	12.7926	0.655169	2.06976	1.32982	0.192117	1.15723	0.870214	1132.83	12.0222	1138.85	9.10439	1150.32	13.0015	1150.32	13.0015	98.4794
-PENN J-3 Spot 78	218.52	131107	2.95571	12.7695	0.527	2.07752	1.21352	0.192489	1.09312	0.900782	1134.84	11.3746	1141.42	8.31826	1153.91	10.4404	1153.91	10.4404	98.3474
-PENN J-3 Spot 296	189.897	34919.7	22.6529	12.7583	0.920253	1.89434	1.28505	0.175363	0.89693	0.697974	1041.59	8.62667	1079.11	8.5402	1155.65	18.2675	1155.65	18.2675	90.1301
-PENN J-3 Spot 143	1062.45	9449.36	3.30548	12.753	1.25639	1.80321	1.62911	0.166858	1.03705	0.636578	994.778	9.5598	1046.62	10.6411	1156.47	24.9454	1156.47	24.9454	86.0188
-PENN J-3 Spot 174	344.469	14058.8	11.7628	12.7407	0.816728	1.8229	2.22136	0.168517	2.06577	0.929956	1003.94	19.2048	1053.73	14.5662	1158.38	16.2166	1158.38	16.2166	86.6671
-PENN J-3 Spot 142	1091.07	152097	3.37575	12.7309	0.944052	2.00521	1.54603	0.185229	1.22432	0.791916	1095.48	12.3345	1117.28	10.4749	1159.91	18.727	1159.91	18.727	94.4454
-PENN J-3 Spot 88	112.507	127042	1.33867	12.708	0.726519	2.13726	1.19486	0.197071	0.948608	0.793908	1159.56	10.0672	1160.94	8.26538	1163.49	14.4164	1163.49	14.4164	99.6629
-PENN J-3 Spot 100	89.486	23410.1	2.85457	12.7048	0.768111	2.12913	1.21827	0.196272	0.945618	0.776196	1155.26	10.0014	1158.3	8.41711	1163.98	15.2285	1163.98	15.2285	99.2507
-PENN J-3 Spot 217	116.25	18275.3	1.57349	12.6659	0.500185	2.17827	1.14165	0.200187	1.02624	0.898914	1176.32	11.0346	1174.13	7.94495	1170.09	9.92176	1170.09	9.92176	100.533
-PENN J-3 Spot 84	114.403	64682.7	2.09179	12.6536	0.678515	2.07992	1.15763	0.190963	0.937939	0.810222	1126.59	9.6949	1142.21	7.9381	1172.02	13.4495	1172.02	13.4495	96.1237
-PENN J-3 Spot 155	187.009	44978.2	4.01061	12.6451	0.614827	2.16275	1.05626	0.198435	0.858873	0.81313	1166.91	9.1675	1169.16	7.33412	1173.34	12.1858	1173.34	12.1858	99.4513
-PENN J-3 Spot 87	554.813	7479.61	3.80225	12.6406	1.32959	1.7565	1.9361	0.161103	1.40737	0.726908	962.905	12.5881	1029.56	12.5277	1174.05	26.2934	1174.05	26.2934	82.0156
-PENN J-3 Spot 260	55.1476	36823.2	1.93998	12.6144	0.692639	2.07814	1.24473	0.190207	1.03422	0.830877	1122.5	10.6545	1141.62	8.533	1178.16	13.7163	1178.16	13.7163	95.2754
-PENN J-3 Spot 44	298.283	74498.9	2.37102	12.6029	0.585995	2.12191	1.44037	0.194037	1.31577	0.9135	1143.21	13.7837	1155.96	9.94083	1179.96	11.5778	1179.96	11.5778	96.8851
-PENN J-3 Spot 46	231.989	30316.4	21.012	12.5828	0.750198	2.08036	1.27576	0.189935	1.03188	0.808832	1121.02	10.6177	1142.35	8.74877	1183.11	14.8256	1183.11	14.8256	94.7525
-PENN J-3 Spot 162	877.502	7082.29	4.86561	12.577	0.822046	1.87617	1.33566	0.171214	1.05273	0.788168	1018.8	9.92058	1072.71	8.84699	1184.02	16.2437	1184.02	16.2437	86.0457
-PENN J-3 Spot 301	192.473	220238	1.92915	12.5418	0.782461	2.03858	1.20153	0.185514	0.911826	0.758888	1097.03	9.19814	1128.49	8.18523	1189.55	15.4482	1189.55	15.4482	92.2223
-PENN J-3 Spot 265	174.035	528420	2.51178	12.5367	0.62941	2.15524	1.17341	0.19605	0.990315	0.843966	1154.07	10.4643	1166.74	8.13862	1190.36	12.4079	1190.36	12.4079	96.9511
-PENN J-3 Spot 63	102.808	238283	6.561	12.4124	0.73288	2.24591	1.0954	0.202271	0.814114	0.743213	1187.51	8.82949	1195.51	7.69601	1209.97	14.4132	1209.97	14.4132	98.1436
-PENN J-3 Spot 297	234.817	102261	12.163	12.3166	0.667318	2.31403	1.28418	0.2068	1.09718	0.854382	1211.75	12.1202	1216.6	9.10501	1225.2	13.1081	1225.2	13.1081	98.9021
-PENN J-3 Spot 10	37.9874	8891.08	0.99082	12.1997	1.13059	2.35458	1.63722	0.208426	1.18417	0.723282	1220.43	13.1663	1228.94	11.6689	1243.94	22.1595	1243.94	22.1595	98.1096
-PENN J-3 Spot 255	435.832	62106.6	2.0359	12.1798	0.479299	2.39694	1.20374	0.211829	1.1042	0.917309	1238.55	12.4426	1241.69	8.62465	1247.14	9.39126	1247.14	9.39126	99.3113
-PENN J-3 Spot 190	209.909	12171.6	2.32703	12.0946	0.658021	2.38496	1.35743	0.209296	1.18728	0.874651	1225.07	13.2465	1238.1	9.71157	1260.87	12.8549	1260.87	12.8549	97.1604
-PENN J-3 Spot 250	145.089	37814	1.98486	12.0829	0.492881	2.453	0.850025	0.215059	0.692539	0.814728	1255.71	7.90174	1258.31	6.13151	1262.73	9.61206	1262.73	9.61206	99.4445
-PENN J-3 Spot 213	118.865	32938.6	1.38805	12.0155	0.582143	2.42489	1.02022	0.211408	0.837825	0.821223	1236.32	9.42547	1250.01	7.33458	1273.65	11.3563	1273.65	11.3563	97.0688
-PENN J-3 Spot 76	131.319	49111.9	2.1401	12.0104	0.642397	2.62621	1.04957	0.228863	0.830019	0.790815	1328.54	9.96502	1308	7.71841	1274.48	12.5298	1274.48	12.5298	104.242
-PENN J-3 Spot 185	127.422	16663.1	2.33489	11.9817	0.711697	2.53271	1.19085	0.220188	0.954786	0.801767	1282.87	11.1069	1281.48	8.66914	1279.14	13.8542	1279.14	13.8542	100.292
-PENN J-3 Spot 286	126.381	15388.1	3.92295	11.9502	0.507327	2.46146	1.07609	0.21343	0.948988	0.881889	1247.07	10.7602	1260.79	7.76996	1284.27	9.88073	1284.27	9.88073	97.1033
-PENN J-3 Spot 180	122.696	2853.83	6.15265	11.9444	0.959092	1.1451	1.64731	0.0992417	1.33932	0.813033	609.963	7.79476	774.924	8.92917	1285.22	18.6598	1285.22	18.6598	47.46
-PENN J-3 Spot 11	668.391	37593.8	2.88881	11.9394	0.542079	2.39449	1.1728	0.207435	1.04001	0.886772	1215.14	11.5179	1240.95	8.40047	1286.04	10.5558	1286.04	10.5558	94.4872
-PENN J-3 Spot 263	163.627	37201.1	4.03061	11.8316	0.672348	2.45418	1.26824	0.210687	1.07535	0.847909	1232.48	12.0636	1258.65	9.14967	1303.67	13.0599	1303.67	13.0599	94.5392
-PENN J-3 Spot 264	485.055	8195.95	4.95113	11.8196	1.66171	2.20228	2.09304	0.188871	1.27261	0.608019	1115.25	13.033	1181.77	14.6167	1305.64	32.2692	1305.64	32.2692	85.4183
-PENN J-3 Spot 38	31.0546	36956.5	3.14655	11.8133	0.881508	2.4293	1.24378	0.208228	0.877456	0.705476	1219.37	9.7484	1251.31	8.94663	1306.68	17.114	1306.68	17.114	93.3178
-PENN J-3 Spot 47	96.2149	6302.03	1.43908	11.4937	0.875424	2.66115	1.40722	0.221929	1.10177	0.782943	1292.06	12.8997	1317.74	10.3863	1359.74	16.8711	1359.74	16.8711	95.023
-PENN J-3 Spot 116	73.4903	58152.2	0.994159	11.4235	0.883518	2.80264	1.27853	0.232303	0.924133	0.722812	1346.56	11.2303	1356.24	9.56828	1371.53	16.9998	1371.53	16.9998	98.1792
-PENN J-3 Spot 231	108.919	37500.7	3.06707	11.4201	0.686688	2.80725	0.998622	0.232615	0.725055	0.726056	1348.19	8.82064	1357.47	7.47668	1372.1	13.2118	1372.1	13.2118	98.2572
-PENN J-3 Spot 272	192.252	63455.2	2.4821	11.3286	0.572704	2.81739	0.900447	0.231585	0.694849	0.771671	1342.8	8.42276	1360.17	6.748	1387.56	10.9943	1387.56	10.9943	96.774
-PENN J-3 Spot 288	274.682	253363	3.30648	11.2917	0.8422	2.9432	1.25541	0.241139	0.930995	0.741587	1392.61	11.6604	1393.1	9.51478	1393.82	16.1542	1393.82	16.1542	99.9137
-PENN J-3 Spot 191	94.393	70240.5	1.11334	11.2827	0.635948	2.88517	1.13785	0.236195	0.943539	0.829232	1366.88	11.6215	1378.04	8.57996	1395.36	12.1954	1395.36	12.1954	97.9595
-PENN J-3 Spot 43	318.63	253212	2.91096	11.2285	0.578714	2.95688	1.59765	0.240904	1.48915	0.932089	1391.4	18.6365	1396.62	12.123	1404.58	11.0839	1404.58	11.0839	99.0616
-PENN J-3 Spot 97	906.034	4017.22	8.61482	11.1802	0.618253	1.32249	2.22522	0.107283	2.1376	0.960627	656.95	13.3511	855.604	12.8666	1412.83	11.8279	1412.83	11.8279	46.4989
-PENN J-3 Spot 234	61.3999	8050.91	1.88204	10.9948	0.687001	3.27924	1.0817	0.261606	0.835522	0.772418	1498.06	11.1687	1476.14	8.4169	1444.75	13.0865	1444.75	13.0865	103.689
-PENN J-3 Spot 26	74.3974	11697.7	2.39722	10.9867	0.855079	3.16547	1.40736	0.252346	1.11782	0.794262	1450.56	14.5198	1448.78	10.8599	1446.15	16.2852	1446.15	16.2852	100.305
-PENN J-3 Spot 239	486.541	387515	1.64565	10.9148	0.600355	3.07008	1.60087	0.243138	1.48404	0.927018	1402.99	18.711	1425.26	12.2618	1458.65	11.4145	1458.65	11.4145	96.1838
-PENN J-3 Spot 178	178.86	307978	1.95615	10.8638	0.649579	3.39527	1.03811	0.267635	0.809762	0.780037	1528.78	11.0211	1503.3	8.14273	1467.55	12.3357	1467.55	12.3357	104.172
-PENN J-3 Spot 285	185.364	16350.7	1.84643	10.832	0.675833	2.97343	1.1979	0.233698	0.989046	0.82565	1353.85	12.0776	1400.85	9.10236	1473.11	12.8247	1473.11	12.8247	91.9041
-PENN J-3 Spot 117	150.496	26688.9	2.69667	10.8093	0.637315	3.28715	1.23255	0.257812	1.055	0.855944	1478.64	13.9399	1478.01	9.59622	1477.1	12.0873	1477.1	12.0873	100.104
-PENN J-3 Spot 125	184.213	71772.3	2.96308	10.7973	0.761722	3.27345	1.34583	0.256454	1.10952	0.824414	1471.67	14.5988	1474.76	10.468	1479.2	14.4428	1479.2	14.4428	99.4913
-PENN J-3 Spot 13	308.329	74219.8	1.55852	10.7857	0.594647	3.17435	1.41424	0.248423	1.28315	0.907306	1430.34	16.4599	1450.94	10.9204	1481.23	11.2718	1481.23	11.2718	96.564
-PENN J-3 Spot 233	473.932	46863.8	2.56387	10.7807	0.568852	3.2072	1.13705	0.250878	0.984521	0.865858	1443	12.7289	1458.9	8.8014	1482.11	10.7815	1482.11	10.7815	97.3609
-PENN J-3 Spot 1	112.577	49873.3	2.66423	10.7276	0.701234	3.34929	1.20011	0.260702	0.973928	0.811532	1493.43	12.9831	1492.63	9.38421	1491.46	13.274	1491.46	13.274	100.132
-PENN J-3 Spot 170	185.748	36957.7	2.47886	10.6927	0.526612	3.29277	1.24368	0.255468	1.12668	0.905928	1466.61	14.7792	1479.35	9.68666	1497.64	9.96026	1497.64	9.96026	97.9285
-PENN J-3 Spot 237	49.0767	16840	1.6075	10.6795	0.994303	3.31686	1.3936	0.257018	0.976461	0.700676	1474.57	12.8705	1485.03	10.8728	1499.98	18.8005	1499.98	18.8005	98.306
-PENN J-3 Spot 16	302.266	37598.4	2.88349	10.6766	0.801979	3.25057	1.61014	0.251814	1.3962	0.867131	1447.82	18.1054	1469.31	12.5034	1500.49	15.1629	1500.49	15.1629	96.4904
-PENN J-3 Spot 150	138.384	146800	2.12392	10.6764	0.492026	3.33519	1.02943	0.258366	0.904233	0.878382	1481.48	11.9681	1489.33	8.04171	1500.51	9.30252	1500.51	9.30252	98.7312
-PENN J-3 Spot 164	164.443	25384.4	2.72149	10.6321	0.493595	3.44982	1.02107	0.266136	0.893844	0.875395	1521.16	12.1117	1515.83	8.03804	1508.37	9.32243	1508.37	9.32243	100.848
-PENN J-3 Spot 3	131.439	15193.4	2.13888	10.5689	0.680978	3.46183	1.00474	0.265475	0.73877	0.735281	1517.79	9.99074	1518.56	7.91566	1519.63	12.8408	1519.63	12.8408	99.8794
-PENN J-3 Spot 62	95.0228	30119	2.9426	10.546	0.916434	3.0122	1.77383	0.230494	1.51876	0.856202	1337.09	18.3395	1410.71	13.5229	1523.71	17.272	1523.71	17.272	87.7521
-PENN J-3 Spot 102	170.797	31136.6	1.71002	10.493	0.626051	3.35139	1.15342	0.25516	0.968727	0.839875	1465.03	12.695	1493.12	9.02038	1533.2	11.7853	1533.2	11.7853	95.5537
-PENN J-3 Spot 69	83.0766	268055	2.73898	10.4329	0.736363	3.32161	1.28596	0.251443	1.05425	0.819822	1445.91	13.655	1486.14	10.0363	1544.02	13.8422	1544.02	13.8422	93.646
-PENN J-3 Spot 169	74.2644	259515	3.37021	10.2878	0.678118	3.64042	1.26654	0.271746	1.0697	0.844591	1549.66	14.7348	1558.42	10.0892	1570.29	12.7017	1570.29	12.7017	98.6861
-PENN J-3 Spot 181	60.1147	9298.19	2.15091	10.0815	1.07857	3.77124	1.27502	0.275866	0.679981	0.533308	1570.51	9.47783	1586.64	10.2333	1608.13	20.1045	1608.13	20.1045	97.6604
-PENN J-3 Spot 66	348.003	306218	2.18743	10.0538	0.607443	3.93624	1.31822	0.287145	1.16992	0.8875	1627.24	16.8247	1621.17	10.6738	1613.27	11.3142	1613.27	11.3142	100.866
-PENN J-3 Spot 310	126.999	180437	0.815229	10.0328	0.701633	3.80187	1.12904	0.276763	0.884557	0.78346	1575.04	12.3607	1593.14	9.0769	1617.16	13.0623	1617.16	13.0623	97.3954
-PENN J-3 Spot 161	37.8413	20026.8	2.96809	10.0254	0.776922	3.82847	1.36112	0.278494	1.1176	0.821091	1583.77	15.6936	1598.75	10.9587	1618.53	14.4616	1618.53	14.4616	97.8524
-PENN J-3 Spot 208	190.799	45748.7	2.79038	9.99813	0.6538	3.71267	1.37066	0.269335	1.20468	0.878905	1537.42	16.4781	1574.1	10.9647	1623.6	12.1616	1623.6	12.1616	94.6921
-PENN J-3 Spot 172	331.624	46108.5	14.994	9.98982	0.705205	4.09021	2.61694	0.296477	2.52013	0.963007	1673.81	37.1512	1652.35	21.3549	1625.15	13.1153	1625.15	13.1153	102.995
-PENN J-3 Spot 17	44.9809	99101.5	2.63416	9.98534	0.875425	3.78286	1.21655	0.274076	0.844756	0.694389	1561.46	11.7145	1589.11	9.77022	1625.98	16.2798	1625.98	16.2798	96.0315
-PENN J-3 Spot 23	86.3634	28003.1	1.44586	9.97842	0.650555	3.7517	1.2349	0.27163	1.04965	0.849985	1549.07	14.4537	1582.48	9.90046	1627.27	12.0955	1627.27	12.0955	95.1943
-PENN J-3 Spot 267	150.637	113377	4.87448	9.96442	0.576699	3.91492	1.1036	0.28305	0.940936	0.852603	1606.7	13.3813	1616.77	8.92609	1629.88	10.7185	1629.88	10.7185	98.5779
-PENN J-3 Spot 203	76.5038	14211.2	3.13438	9.95201	0.784875	3.9593	1.20125	0.285902	0.909384	0.75703	1621.02	13.0339	1625.9	9.73813	1632.2	14.584	1632.2	14.584	99.3148
-PENN J-3 Spot 156	168.296	98827.6	2.24747	9.93342	0.576654	4.16813	0.954098	0.30042	0.760114	0.796683	1693.39	11.3199	1667.78	7.81338	1635.67	10.7113	1635.67	10.7113	103.529
-PENN J-3 Spot 45	119.366	31939.5	0.75051	9.91533	0.576836	3.93972	1.13778	0.283439	0.980721	0.861957	1608.66	13.9621	1621.88	9.21436	1639.06	10.71	1639.06	10.71	98.1454
-PENN J-3 Spot 129	125.619	35702.4	2.11764	9.90456	0.858453	3.99924	1.49258	0.287409	1.22101	0.818051	1628.57	17.5721	1634.04	12.1245	1641.08	15.9348	1641.08	15.9348	99.2379
-PENN J-3 Spot 290	263.914	1.68385e+06	1.43992	9.90166	0.631872	3.99642	1.17321	0.287122	0.988509	0.842571	1627.13	14.215	1633.47	9.5286	1641.62	11.728	1641.62	11.728	99.1175
-PENN J-3 Spot 311	256.756	158397	2.54831	9.88578	0.742323	4.02278	1.13984	0.288553	0.864976	0.75886	1634.29	12.4867	1638.81	9.26973	1644.6	13.7729	1644.6	13.7729	99.3735
-PENN J-3 Spot 27	225.1	500880	3.11505	9.88512	0.666393	3.88368	1.27383	0.278557	1.08562	0.852247	1584.09	15.2472	1610.3	10.2862	1644.72	12.3639	1644.72	12.3639	96.3135
-PENN J-3 Spot 198	77.2953	23205	1.7652	9.88428	0.686936	3.97484	1.17378	0.285071	0.951774	0.810864	1616.85	13.6106	1629.07	9.5229	1644.88	12.7448	1644.88	12.7448	98.2958
-PENN J-3 Spot 168	231.572	55607	1.66386	9.88101	0.626338	4.00872	1.21261	0.287405	1.03832	0.856274	1628.55	14.9428	1635.96	9.85469	1645.49	11.6195	1645.49	11.6195	98.9702
-PENN J-3 Spot 230	205.096	38299.6	1.61587	9.85481	0.642599	3.96786	1.29592	0.283722	1.12538	0.868401	1610.08	16.0339	1627.65	10.5102	1650.42	11.9137	1650.42	11.9137	97.5559
-PENN J-3 Spot 96	279.15	59193.6	2.25793	9.84966	0.70718	4.21217	1.2936	0.301034	1.08319	0.837345	1696.43	16.1566	1676.39	10.6153	1651.39	13.1077	1651.39	13.1077	102.728
-PENN J-3 Spot 19	196.789	66088.5	2.28989	9.84506	0.623686	4.06409	1.11068	0.290315	0.919041	0.827454	1643.1	13.3299	1647.13	9.05095	1652.25	11.5586	1652.25	11.5586	99.4464
-PENN J-3 Spot 20	107.074	58371.3	1.38041	9.84259	0.706281	4.15173	1.18257	0.296501	0.948496	0.802062	1673.94	13.9832	1664.55	9.67714	1652.72	13.0888	1652.72	13.0888	101.284
-PENN J-3 Spot 82	76.5316	164477	2.52239	9.8373	0.664493	4.11769	1.08233	0.293912	0.854333	0.789347	1661.05	12.51	1657.82	8.84259	1653.71	12.3127	1653.71	12.3127	100.443
-PENN J-3 Spot 247	135.59	39241.4	3.10251	9.83061	0.622505	3.77773	1.13476	0.269463	0.948771	0.836099	1538.08	12.9825	1588.02	9.11076	1654.97	11.5327	1654.97	11.5327	92.9366
-PENN J-3 Spot 28	578.921	104989	4.49501	9.80731	0.493841	3.88895	1.08802	0.276739	0.96949	0.891058	1574.92	13.5466	1611.39	8.78809	1659.37	9.14351	1659.37	9.14351	94.9105
-PENN J-3 Spot 294	306.505	112670	1.1473	9.79313	0.651269	4.12625	1.6794	0.293201	1.54797	0.921744	1657.5	22.6247	1659.52	13.7267	1662.05	12.0548	1662.05	12.0548	99.7267
-PENN J-3 Spot 83	194.96	60590.9	2.47123	9.74467	0.73939	4.15671	1.05955	0.293903	0.758909	0.716258	1661.01	11.1125	1665.53	8.67237	1671.22	13.6702	1671.22	13.6702	99.3886
-PENN J-3 Spot 104	157.104	117604	2.45087	9.74122	0.588924	4.01448	1.04936	0.283747	0.868517	0.827665	1610.2	12.3751	1637.13	8.53036	1671.88	10.887	1671.88	10.887	96.3112
-PENN J-3 Spot 42	150.57	36998.4	1.67048	9.72064	0.603593	4.16526	1.26378	0.293781	1.11033	0.878573	1660.4	16.253	1667.21	10.3483	1675.79	11.1544	1675.79	11.1544	99.0816
-PENN J-3 Spot 18	66.387	23645.6	1.32364	9.67561	0.712162	4.28997	1.29644	0.301176	1.08332	0.835612	1697.14	16.1645	1691.44	10.6758	1684.36	13.1464	1684.36	13.1464	100.758
-PENN J-3 Spot 12	150.381	41103.4	2.00144	9.665	0.634292	3.85106	1.25387	0.270066	1.0816	0.862611	1541.14	14.8262	1603.49	10.1074	1686.39	11.7059	1686.39	11.7059	91.3869
-PENN J-3 Spot 188	814.193	16522.1	6.93452	9.66288	0.722503	3.73623	1.35753	0.261955	1.14929	0.846607	1499.84	15.3792	1579.16	10.8742	1686.79	13.3332	1686.79	13.3332	88.9165
-PENN J-3 Spot 270	296.489	7587.57	3.16111	9.62643	1.25749	3.69796	2.36083	0.258294	1.99806	0.846338	1481.11	26.4401	1570.93	18.8711	1693.76	23.1843	1693.76	23.1843	87.4448
-PENN J-3 Spot 80	145.72	28134.3	2.74797	9.50083	0.632309	4.31498	1.17464	0.297459	0.989935	0.842754	1678.7	14.6305	1696.23	9.68336	1717.94	11.6229	1717.94	11.6229	97.7159
-PENN J-3 Spot 89	85.7558	21473.6	2.13664	9.4503	0.746602	4.48852	1.29924	0.307777	1.06331	0.818403	1729.76	16.1317	1728.85	10.7891	1727.74	13.707	1727.74	13.707	100.117
-PENN J-3 Spot 306	978.628	802240	1.66501	9.43854	0.602752	3.94272	1.36847	0.270015	1.22858	0.897774	1540.88	16.8384	1622.5	11.0844	1730.02	11.0628	1730.02	11.0628	89.0671
-PENN J-3 Spot 210	113.869	21436.1	3.1689	9.42134	0.691164	4.2787	1.15759	0.292491	0.928607	0.802189	1653.96	13.5468	1689.27	9.52758	1733.37	12.6784	1733.37	12.6784	95.4191
-PENN J-3 Spot 153	340.027	337233	3.89597	9.40663	0.759776	4.49095	1.53515	0.306521	1.33395	0.868939	1723.56	20.1746	1729.3	12.7496	1736.23	13.9322	1736.23	13.9322	99.2703
-PENN J-3 Spot 4	281.32	80981.2	2.54752	9.38861	0.641689	4.37714	1.33263	0.298181	1.16796	0.876434	1682.28	17.2938	1708.03	11.0152	1739.75	11.7614	1739.75	11.7614	96.6968
-PENN J-3 Spot 275	356.887	852954	2.54865	9.35805	0.650565	4.52431	1.25732	0.307203	1.07593	0.855731	1726.93	16.2999	1735.45	10.456	1745.72	11.9152	1745.72	11.9152	98.9235
-PENN J-3 Spot 112	88.1251	51432	2.91488	9.34162	0.744392	4.49074	1.31563	0.304388	1.08478	0.824537	1713.03	16.3186	1729.26	10.9261	1748.94	13.6285	1748.94	13.6285	97.9469
-PENN J-3 Spot 131	245.043	143767	1.9277	9.32066	0.556889	4.46184	1.16389	0.301751	1.02202	0.878104	1699.98	15.2721	1723.9	9.65454	1753.05	10.1917	1753.05	10.1917	96.9729
-PENN J-3 Spot 274	1128.99	20758.9	3.60177	9.31541	0.618294	4.02989	1.36576	0.272385	1.21779	0.891658	1552.9	16.8057	1640.25	11.1111	1754.08	11.3141	1754.08	11.3141	88.5305
-PENN J-3 Spot 254	191.467	50688.2	2.20966	9.30434	0.757244	4.61721	1.10422	0.311712	0.803673	0.727817	1749.13	12.3116	1752.38	9.21632	1756.26	13.853	1756.26	13.853	99.594
-PENN J-3 Spot 99	206.91	63220.8	1.30045	9.26752	0.486792	4.58285	0.991285	0.308168	0.863527	0.871119	1731.68	13.1135	1746.15	8.26262	1763.51	8.89724	1763.51	8.89724	98.1955
-PENN J-3 Spot 50	259.33	46502.6	9.49387	9.2275	0.634449	4.6216	1.24391	0.309431	1.06994	0.860147	1737.91	16.299	1753.18	10.384	1771.41	11.5829	1771.41	11.5829	98.1085
-PENN J-3 Spot 298	167.131	34712.3	2.01315	9.16221	0.50518	4.7438	1.0661	0.315366	0.938805	0.8806	1767.06	14.5098	1775.01	8.94056	1784.36	9.20774	1784.36	9.20774	99.0301
-PENN J-3 Spot 144	127.06	54478.8	2.52333	9.14779	0.683158	4.7336	1.11854	0.314192	0.88568	0.791817	1761.3	13.65	1773.21	9.37688	1787.23	12.448	1787.23	12.448	98.549
-PENN J-3 Spot 14	343.935	282143	3.30763	9.14722	0.52022	4.62174	1.24528	0.306748	1.13142	0.908561	1724.69	17.1211	1753.2	10.3956	1787.35	9.47844	1787.35	9.47844	96.4941
-PENN J-3 Spot 52	377.463	4.56434e+06	3.23517	9.12646	0.556154	4.67497	1.26041	0.309577	1.13108	0.897385	1738.63	17.2365	1762.77	10.5432	1791.49	10.13	1791.49	10.13	97.0493
-PENN J-3 Spot 202	150.559	30427.9	3.436	9.11539	0.773019	5.02305	1.16757	0.332223	0.875022	0.749438	1849.15	14.0667	1823.22	9.88731	1793.7	14.0744	1793.7	14.0744	103.091
-PENN J-3 Spot 130	159.911	38937.9	1.70647	9.10859	0.62714	4.78779	1.04989	0.316427	0.841997	0.801988	1772.26	13.0469	1782.76	8.81873	1795.06	11.4179	1795.06	11.4179	98.7298
-PENN J-3 Spot 79	146.641	50949.3	2.31609	9.10562	0.818803	4.84232	1.17317	0.319927	0.840168	0.716154	1789.37	13.1276	1792.28	9.87351	1795.65	14.9064	1795.65	14.9064	99.6503
-PENN J-3 Spot 245	167.601	38871	5.24757	9.09328	0.642628	4.76048	1.08611	0.314094	0.875597	0.806175	1760.82	13.4914	1777.96	9.11399	1798.12	11.6955	1798.12	11.6955	97.9257
-PENN J-3 Spot 300	202.96	72027.6	6.71871	9.08898	0.541416	4.8769	1.16911	0.321623	1.03618	0.886305	1797.65	16.2553	1798.27	9.85129	1798.98	9.8524	1798.98	9.8524	99.9261
-PENN J-3 Spot 57	375.203	7986.75	2.18121	9.07752	0.818313	3.88376	1.51678	0.255804	1.2771	0.841982	1468.34	16.7699	1610.31	12.2482	1801.28	14.8872	1801.28	14.8872	81.5166
-PENN J-3 Spot 74	95.2732	22141	1.85915	9.06398	0.498262	4.94215	1.05766	0.325029	0.93294	0.88208	1814.24	14.7526	1809.49	8.93222	1803.99	9.06149	1803.99	9.06149	100.568
-PENN J-3 Spot 141	591.255	455669	5.84508	9.02608	0.668842	4.76423	1.17353	0.312018	0.964276	0.821687	1750.63	14.7829	1778.62	9.84895	1811.61	12.1506	1811.61	12.1506	96.634
-PENN J-3 Spot 224	450.472	30003.1	2.88924	9.01352	0.637899	4.63787	1.56893	0.30332	1.4334	0.913615	1707.75	21.5049	1756.11	13.1058	1814.14	11.5848	1814.14	11.5848	94.1356
-PENN J-3 Spot 110	29.1891	38898.6	1.634	8.95722	0.778982	4.77332	1.24131	0.310228	0.966458	0.778578	1741.83	14.7515	1780.22	10.4213	1825.51	14.1278	1825.51	14.1278	95.4162
-PENN J-3 Spot 259	223.55	961185	3.79427	8.94577	0.665131	5.06537	1.24037	0.328788	1.04696	0.844068	1832.51	16.6997	1830.32	10.5184	1827.83	12.0593	1827.83	12.0593	100.256
-PENN J-3 Spot 304	255.862	123592	3.40951	8.90166	0.570369	5.14009	1.27152	0.331993	1.13642	0.893746	1848.04	18.2593	1842.76	10.8085	1836.79	10.3314	1836.79	10.3314	100.613
-PENN J-3 Spot 70	184.566	66877.9	2.64111	8.90111	0.601841	4.76939	1.69247	0.308031	1.58185	0.934639	1731.01	24.0139	1779.53	14.2073	1836.9	10.9014	1836.9	10.9014	94.2357
-PENN J-3 Spot 182	190.992	32395.3	4.61277	8.67406	0.671967	5.13534	1.09952	0.323206	0.870292	0.791519	1805.37	13.7036	1841.97	9.34494	1883.56	12.1013	1883.56	12.1013	95.8485
-PENN J-3 Spot 15	66.4997	21316.8	1.86424	8.64261	0.896046	5.40841	1.33498	0.339158	0.989584	0.741272	1882.62	16.1563	1886.19	11.4404	1890.1	16.1249	1890.1	16.1249	99.6038
-PENN J-3 Spot 146	441.578	104576	36.5976	8.62831	0.695847	5.3243	1.44028	0.333331	1.26103	0.875546	1854.51	20.3228	1872.77	12.3125	1893.08	12.5172	1893.08	12.5172	97.9624
-PENN J-3 Spot 293	316.643	70646.2	9.07353	8.49799	0.562119	5.61799	1.38593	0.346406	1.26681	0.914055	1917.41	21.0107	1918.86	11.9466	1920.42	10.0782	1920.42	10.0782	99.8436
-PENN J-3 Spot 111	811.838	104410	3.50929	8.4937	0.733242	4.84304	1.28882	0.298471	1.05991	0.822389	1683.72	15.7058	1792.41	10.8472	1921.32	13.1456	1921.32	13.1456	87.6337
-PENN J-3 Spot 71	175.312	32662.7	4.58186	8.45542	0.801866	5.71883	1.13024	0.350857	0.796526	0.70474	1938.69	13.3364	1934.22	9.76849	1929.41	14.3624	1929.41	14.3624	100.481
-PENN J-3 Spot 241	306.301	58812.1	2.40246	8.41696	0.713297	5.42935	1.40512	0.331582	1.21061	0.861569	1846.05	19.4333	1889.5	12.0488	1937.58	12.7635	1937.58	12.7635	95.2761
-PENN J-3 Spot 262	1386.73	799.926	19.7058	8.12727	1.60534	1.25101	2.21716	0.0737722	1.52927	0.689745	458.842	6.77304	823.859	12.5121	2000.02	28.5201	2000.02	28.5201	22.9419
-PENN J-3 Spot 253	214.618	33768.1	3.20039	7.73279	0.671507	6.81038	1.09154	0.382116	0.860549	0.788379	2086.16	15.3372	2087.07	9.66458	2087.96	11.8107	2087.96	11.8107	99.9139
-PENN J-3 Spot 291	444.869	56084	1.96218	6.75591	1.00218	7.64552	1.73848	0.374782	1.42054	0.817116	2051.86	24.9642	2190.22	15.6117	2322.4	17.1821	2322.4	17.1821	88.351
-PENN J-3 Spot 103	52.6905	30727.3	1.29456	6.53309	1.00333	8.58451	1.39314	0.406932	0.966512	0.693768	2200.88	18.0208	2294.92	12.6704	2379.72	17.0966	2379.72	17.0966	92.4847
-PENN J-3 Spot 119	687.996	501.511	0.744005	6.48624	2.12365	1.95682	2.83734	0.092094	1.88166	0.663175	567.909	10.2289	1100.79	19.0686	2391.97	36.1444	2391.97	36.1444	23.7423
-PENN J-3 Spot 209	70.1653	30695.1	4.53626	6.33317	0.893972	8.63627	1.45689	0.396858	1.15037	0.789605	2154.56	21.0688	2300.39	13.2586	2432.53	15.1504	2432.53	15.1504	88.5726
-PENN J-3 Spot 308	24.262	13017.6	1.46941	6.24944	0.705108	9.34786	1.02386	0.423878	0.742373	0.72507	2278.06	14.2465	2372.73	9.39173	2455.06	11.9215	2455.06	11.9215	92.7903
-PENN J-3 Spot 32	1001.2	429.881	0.453659	5.76454	15.8625	1.66481	15.9105	0.0696334	1.23447	0.0775888	433.947	5.18063	995.211	101.262	2590.71	266.505	2590.71	266.505	16.7501
-PENN J-3 Spot 205	107.161	27143.5	3.3819	5.73955	0.889311	9.82586	1.3027	0.409201	0.951922	0.73073	2211.27	17.819	2418.58	12.0061	2597.95	14.8259	2597.95	14.8259	85.1157
-PENN J-3 Spot 195	43.6022	10843.2	1.1239	5.54168	0.814257	12.2172	1.23785	0.49125	0.932346	0.753195	2576.08	19.7992	2621.23	11.6185	2656.28	13.502	2656.28	13.502	96.9808
-PENN J-3 Spot 235	25.4436	38020.5	0.985114	5.44449	0.535112	13.3927	0.961688	0.529069	0.799062	0.830895	2737.53	17.8232	2707.74	9.0866	2685.58	8.84514	2685.58	8.84514	101.934
-PENN J-3 Spot 227	77.5419	71350.5	1.72717	5.41834	0.67523	13.0594	1.24768	0.513424	1.04918	0.840902	2671.23	22.9449	2683.95	11.7682	2693.53	11.154	2693.53	11.154	99.1721
-PENN J-3 Spot 39	146.952	58009.9	1.60889	5.3419	0.758051	13.521	1.40438	0.524072	1.18222	0.841809	2716.43	26.2062	2716.75	13.2786	2716.98	12.4982	2716.98	12.4982	99.9795
-PENN J-3 Spot 279	58.2429	64614.9	2.07605	5.3166	0.601315	13.7888	1.02099	0.531923	0.825134	0.808168	2749.55	18.4695	2735.31	9.66627	2724.81	9.90668	2724.81	9.90668	100.908
-PENN J-3 Spot 124	228.518	321512	2.88513	5.2771	0.558096	11.792	1.09186	0.451515	0.938449	0.859496	2401.98	18.8183	2588.03	10.2202	2737.08	9.18101	2737.08	9.18101	87.7572
-PENN J-3 Spot 282	196.807	274725	1.6898	5.26208	0.586844	12.0646	1.0621	0.460636	0.885255	0.833493	2442.36	17.9971	2609.44	9.95926	2741.77	9.65002	2741.77	9.65002	89.0799
-PENN J-3 Spot 72	275.496	220399	1.10957	5.19433	0.676834	13.5356	1.47248	0.510148	1.30771	0.888098	2657.26	28.478	2717.78	13.9236	2763.06	11.1117	2763.06	11.1117	96.1709
-PENN J-3 Spot 22	220.777	47230.6	1.05114	5.09601	0.584838	14.2448	1.17668	0.526713	1.02105	0.867737	2727.59	22.7082	2766.14	11.1645	2794.38	9.57428	2794.38	9.57428	97.6096
-PENN J-3 Spot 140	118.001	331730	2.62171	5.07719	0.498515	15.0695	1.18772	0.555148	1.07803	0.907651	2846.55	24.8079	2819.64	11.3099	2800.44	8.15652	2800.44	8.15652	101.646
-PENN J-3 Spot 192	116.044	66121.7	1.29013	5.03274	0.690838	15.179	1.25755	0.554289	1.0508	0.835591	2842.98	24.157	2826.54	11.9803	2814.82	11.2884	2814.82	11.2884	101.001
-PENN J-3 Spot 40	199.729	17685.2	1.7922	4.92364	0.560286	13.3735	1.32897	0.477772	1.20509	0.906785	2517.55	25.1162	2706.39	12.556	2850.56	9.12601	2850.56	9.12601	88.3177
-PENN J-3 Spot 222	121.706	650695	2.10558	4.84125	0.619887	15.8404	1.41798	0.55643	1.27531	0.899383	2851.86	29.3912	2867.22	13.5438	2878.01	10.0682	2878.01	10.0682	99.0912
-PENN J-3 Spot 157	535.323	162241	1.73184	4.84092	0.68276	14.3845	1.29718	0.505253	1.10296	0.850274	2636.33	23.866	2775.41	12.3158	2878.13	11.0897	2878.13	11.0897	91.5989
-PENN J-3 Spot 41	612.816	678281	1.79921	4.7745	0.692243	14.7142	1.27756	0.509745	1.07376	0.840476	2655.54	23.3709	2796.94	12.1472	2900.55	11.2257	2900.55	11.2257	91.5531
-PENN J-3 Spot 207	68.5842	31437.5	2.2407	4.54243	0.762959	17.7587	1.49128	0.585311	1.28133	0.859216	2970.38	30.4969	2976.75	14.336	2981.05	12.2821	2981.05	12.2821	99.6422
Kirby Samples
PennJ4							Isotope ratios						Apparent ages (Ma)
Analysis	U	206Pb	U/Th	206Pb*	±	207Pb*	±	206Pb*	±	error	206Pb*	±	207Pb*	±	206Pb*	±	Best age	±	Conc
	(ppm)	204Pb		207Pb*	(%)	235U*	(%)	238U	(%)	corr.	238U*	(Ma)	235U	(Ma)	207Pb*	(Ma)	(Ma)	(Ma)	(%)
-PENN J-4 Spot 85	205.186	76138.6	1.1115	17.4881	1.09804	0.493531	1.49365	0.0626245	1.01257	0.677917	391.566	3.84687	407.314	5.01166	497.572	24.1696	391.566	3.84687	NA
-PENN J-4 Spot 92	151.213	30627.8	1.68127	17.9407	1.29006	0.484122	1.59219	0.0630206	0.933173	0.586093	393.969	3.56633	400.897	5.27369	441	28.7219	393.969	3.56633	NA
-PENN J-4 Spot 188	598.224	237053	1.10215	18.1946	0.835892	0.478269	1.41042	0.0631397	1.13603	0.805457	394.692	4.34932	396.885	4.63341	409.658	18.6979	394.692	4.34932	NA
-PENN J-4 Spot 104	59.7923	3073.86	2.23755	18.8235	4.38428	0.467636	4.53588	0.0638699	1.16292	0.256382	399.117	4.50064	389.555	14.6761	333.154	99.4199	399.117	4.50064	NA
-PENN J-4 Spot 50	403.233	34134.8	2.41541	18.1088	0.89441	0.495942	1.6806	0.0651641	1.42284	0.846621	406.955	5.61131	408.952	5.65739	420.22	19.9694	406.955	5.61131	96.8433
-PENN J-4 Spot 147	100.69	5909.51	3.64731	18.0289	1.21659	0.504838	1.47809	0.0660402	0.839433	0.567918	412.255	3.35227	414.972	5.03496	430.086	27.1302	412.255	3.35227	95.8541
-PENN J-4 Spot 233	1146.7	121847	4.04227	17.9934	0.78787	0.506495	1.71452	0.0661268	1.52278	0.888163	412.778	6.08867	416.09	5.85309	434.471	17.5471	412.778	6.08867	95.0071
-PENN J-4 Spot 74	607.783	427661	2.02178	18.0326	0.757083	0.507833	1.57777	0.0664458	1.38426	0.877354	414.707	5.55989	416.991	5.39567	429.621	16.8763	414.707	5.55989	96.5286
-PENN J-4 Spot 127	148.923	193248	1.69047	16.9794	1.27323	0.539638	1.71193	0.0664834	1.14437	0.668467	414.935	4.59878	438.186	6.09262	562.242	27.7411	414.935	4.59878	73.8
-PENN J-4 Spot 305	406.483	583826	1.82109	17.6367	0.750524	0.520522	1.26744	0.0666108	1.02133	0.805823	415.705	4.11174	425.5	4.40562	478.893	16.5756	415.705	4.11174	86.8053
-PENN J-4 Spot 311	105.221	28378.2	0.949682	17.8983	1.08352	0.515323	1.52305	0.0669236	1.07036	0.702773	417.595	4.32807	422.022	5.25924	446.265	24.1042	417.595	4.32807	93.5754
-PENN J-4 Spot 216	193.471	29617.3	1.57181	17.476	1.00621	0.527978	1.70504	0.0669491	1.37649	0.807303	417.749	5.56791	430.467	5.98231	499.138	22.161	417.749	5.56791	83.6941
-PENN J-4 Spot 83	234.881	33964.4	1.42502	18.486	0.89423	0.499341	1.29065	0.0669773	0.930659	0.721079	417.919	3.76601	411.256	4.36453	374.007	20.1258	417.919	3.76601	111.741
-PENN J-4 Spot 310	267.36	6953.62	1.93796	18.4842	1.0488	0.502267	1.35749	0.0673633	0.861864	0.634894	420.251	3.50645	413.236	4.60848	374.225	23.5942	420.251	3.50645	112.299
-PENN J-4 Spot 309	199.727	12031.2	5.26478	17.987	0.811213	0.516375	1.28017	0.0673924	0.990335	0.773598	420.426	4.03076	422.727	4.42647	435.271	18.0857	420.426	4.03076	96.5896
-PENN J-4 Spot 203	193.927	17252.4	1.87601	17.7902	1.11859	0.524956	1.36228	0.0677628	0.777547	0.570768	422.663	3.18098	428.457	4.76175	459.739	24.8127	422.663	3.18098	91.9355
-PENN J-4 Spot 220	74.1801	14330	1.22096	17.81	1.46689	0.524871	1.71113	0.0678272	0.881024	0.514878	423.052	3.60752	428.4	5.98051	457.293	32.5491	423.052	3.60752	92.5123
-PENN J-4 Spot 290	271.623	12338.9	2.02568	18.3988	0.986908	0.508409	1.45734	0.0678719	1.07231	0.735801	423.322	4.3935	417.379	4.98756	384.64	22.1727	423.322	4.3935	110.057
-PENN J-4 Spot 142	297.047	76679.2	0.879285	17.5156	0.920884	0.537307	1.28971	0.0682865	0.902953	0.700121	425.824	3.72075	436.648	4.57706	494.112	20.2876	425.824	3.72075	86.1796
-PENN J-4 Spot 148	220.85	9810.17	1.93542	17.7975	1.3781	0.530687	1.6201	0.0685309	0.851803	0.52577	427.299	3.52173	432.266	5.70334	458.827	30.5797	427.299	3.52173	93.1285
-PENN J-4 Spot 151	784.52	1.06984e+06	4.93298	17.7761	0.806973	0.532189	1.45384	0.0686422	1.20931	0.831807	427.97	5.00743	433.261	5.12747	461.47	17.8882	427.97	5.00743	92.7405
-PENN J-4 Spot 54	299.686	26287.5	1.69492	17.9011	0.780342	0.533794	1.33164	0.0693331	1.07905	0.810312	432.137	4.5101	434.325	4.70574	445.923	17.3547	432.137	4.5101	96.9084
-PENN J-4 Spot 150	99.9249	3895.57	0.901372	18.4171	1.50294	0.519256	1.74791	0.069389	0.89238	0.510542	432.474	3.7327	424.654	6.06601	382.4	33.7593	432.474	3.7327	113.095
-PENN J-4 Spot 231	260.755	22819.4	2.05671	17.8379	0.983666	0.538225	1.5365	0.0696619	1.18035	0.768208	434.119	4.95539	437.254	5.45896	453.803	21.8517	434.119	4.95539	95.6624
-PENN J-4 Spot 152	75.77	5749.28	2.26479	18.5986	1.70507	0.520835	2.0065	0.0702859	1.05771	0.527143	437.878	4.47769	425.709	6.97739	360.318	38.4523	437.878	4.47769	121.525
-PENN J-4 Spot 57	441.36	37722.8	2.44463	17.8667	0.812003	0.543109	1.67452	0.0704076	1.46447	0.87456	438.611	6.20968	440.473	5.98434	450.191	18.0355	438.611	6.20968	97.4277
-PENN J-4 Spot 293	130.534	63263	0.448791	17.3674	0.98635	0.560408	1.4566	0.07062	1.07182	0.735836	439.89	4.55755	451.792	5.31178	512.803	21.654	439.89	4.55755	85.7815
-PENN J-4 Spot 302	409.934	14569.2	1.63686	18.0185	0.990633	0.541637	1.56044	0.0708132	1.20566	0.772642	441.053	5.13979	439.503	5.56683	431.37	22.0964	441.053	5.13979	102.245
-PENN J-4 Spot 11	357.522	17103.9	0.588547	18.0692	0.976575	0.540598	1.46456	0.0708766	1.09144	0.745232	441.435	4.65671	438.819	5.21826	425.1	21.7865	441.435	4.65671	103.843
-PENN J-4 Spot 197	695.545	585401	0.651596	17.6151	0.869319	0.561653	1.6067	0.0717862	1.35121	0.840984	446.908	5.83408	452.602	5.86748	481.647	19.2037	446.908	5.83408	92.7875
-PENN J-4 Spot 245	9.3449	318.737	2.55479	53.9509	91.6255	0.185463	91.6405	0.0726013	1.6596	0.0181099	451.809	7.2415	172.751	146.585	NA	NA	451.809	7.2415	NA	* Rev disc.
-PENN J-4 Spot 28	643.018	22673	1.81387	17.7879	0.618111	0.564602	1.27455	0.072871	1.11463	0.874533	453.429	4.88043	454.518	4.67011	460.004	13.7256	453.429	4.88043	98.5708
-PENN J-4 Spot 136	569.079	158481	8.89468	17.5541	0.59756	0.574501	1.2661	0.073174	1.11621	0.881614	455.25	4.90626	460.921	4.6908	489.284	13.1874	455.25	4.90626	93.0441
-PENN J-4 Spot 32	386.566	14888.4	1.62076	17.7375	0.791187	0.570172	1.39441	0.0733817	1.14821	0.823442	456.497	5.06028	458.126	5.14141	466.326	17.5451	456.497	5.06028	97.8923
-PENN J-4 Spot 237	300.725	49243.1	1.59909	17.4597	0.866226	0.583998	1.33211	0.0739836	1.01201	0.759705	460.111	4.49407	467.028	4.98688	501.189	19.0512	460.111	4.49407	91.804
-PENN J-4 Spot 115	481.205	56029.5	1.59321	17.7259	0.731877	0.575884	1.48928	0.0740681	1.29704	0.870918	460.618	5.76598	461.813	5.52615	467.739	16.2276	460.618	5.76598	98.4778
-PENN J-4 Spot 178	489.904	1.01348e+06	1.65381	17.6649	0.929593	0.579039	1.55603	0.0742178	1.24783	0.801933	461.516	5.55763	463.844	5.79385	475.406	20.5695	461.516	5.55763	97.0784
-PENN J-4 Spot 39	236.997	8495.01	3.16116	17.9125	0.937711	0.572163	1.28038	0.0743642	0.871817	0.680906	462.395	3.89006	459.412	4.73144	444.503	20.8537	462.395	3.89006	104.025
-PENN J-4 Spot 124	356.853	236291	1.05481	17.242	0.889299	0.598656	1.4989	0.0748952	1.20659	0.804981	465.58	5.41957	476.381	5.69941	528.746	19.5081	465.58	5.41957	88.0537
-PENN J-4 Spot 20	192.975	14520.6	3.35936	17.9291	0.969759	0.576614	1.42018	0.0750123	1.03754	0.730567	466.283	4.66704	462.283	5.27397	442.438	21.579	466.283	4.66704	105.389
-PENN J-4 Spot 88	197.737	13003.1	1.005	17.4377	0.915863	0.594159	1.43724	0.0751763	1.10763	0.770667	467.266	4.99247	473.52	5.43919	503.941	20.1339	467.266	4.99247	92.7223
-PENN J-4 Spot 298	876.228	6879.57	1.79833	15.579	1.14649	0.670568	1.72113	0.0758003	1.28368	0.745838	471.006	5.83064	521.058	7.01502	746.919	24.2291	471.006	5.83064	63.0599
-PENN J-4 Spot 256	555.652	37265.8	2.96893	17.5863	0.921245	0.609583	1.63416	0.0777849	1.34973	0.82595	482.888	6.27956	483.297	6.28419	485.241	20.3335	482.888	6.27956	99.515
-PENN J-4 Spot 123	107.945	5250.65	1.13427	17.8829	1.9389	0.638937	2.26863	0.0829057	1.17785	0.519191	513.443	5.81304	501.648	8.9805	448.178	43.1043	513.443	5.81304	114.562
-PENN J-4 Spot 252	181.363	5425.38	1.98671	17.7364	1.18054	0.675443	1.68012	0.0869247	1.19546	0.711534	537.324	6.16308	524.016	6.87758	466.464	26.1697	537.324	6.16308	115.191
-PENN J-4 Spot 191	624.334	59751.5	2.00902	16.9686	0.710523	0.73473	1.24287	0.0904612	1.01975	0.820477	558.264	5.45334	559.326	5.3451	563.628	15.4573	558.264	5.45334	99.0483
-PENN J-4 Spot 52	138.743	6649.82	1.57291	17.2129	1.60916	0.738772	1.75757	0.092268	0.706876	0.402189	568.937	3.84932	561.689	7.58262	532.42	35.2626	568.937	3.84932	106.859
-PENN J-4 Spot 181	83.9321	5774.77	1.93205	16.6114	2.37143	0.767473	2.68451	0.0925033	1.25814	0.468667	570.325	6.86723	578.312	11.8365	609.796	51.2621	570.325	6.86723	93.5272
-PENN J-4 Spot 294	1003.64	3098.38	1.61151	13.7477	5.80384	0.942551	6.01796	0.0940202	1.59099	0.264374	579.27	8.8142	674.216	29.6575	1005.81	117.858	579.27	8.8142	57.5926
-PENN J-4 Spot 53	218.546	22302.5	0.71958	15.8218	1.31552	0.85279	1.75465	0.0979006	1.16112	0.661738	602.094	6.67447	626.179	8.2006	714.183	27.9414	602.094	6.67447	84.3053
-PENN J-4 Spot 118	510.763	45496.1	1.4315	16.5562	0.758719	0.835558	1.34986	0.100375	1.11646	0.827089	616.607	6.56516	616.692	6.23927	616.982	16.4007	616.607	6.56516	99.9393
-PENN J-4 Spot 154	201.166	18265.7	1.73371	16.3489	0.960382	0.852831	1.58116	0.101167	1.25608	0.794404	621.244	7.43912	626.201	7.38994	644.171	20.6523	621.244	7.43912	96.4409
-PENN J-4 Spot 18	196.596	12696	1.2996	14.4994	0.972729	1.45262	1.39929	0.152823	1.00589	0.718857	916.768	8.59596	910.957	8.41529	896.879	20.0917	896.879	20.0917	102.217
-PENN J-4 Spot 35	31.7114	3783.97	1.27624	14.4238	2.64627	1.50202	2.87165	0.157196	1.11517	0.388338	941.178	9.7655	931.207	17.5061	907.662	54.5393	907.662	54.5393	103.693
-PENN J-4 Spot 137	491.011	117622	4.55226	14.2898	0.710446	1.47349	1.61448	0.152778	1.44976	0.897975	916.516	12.386	919.56	9.76591	926.86	14.5912	926.86	14.5912	98.884
-PENN J-4 Spot 146	106.967	8047.12	1.29713	14.1253	1.46147	1.56519	1.75664	0.160419	0.974621	0.554822	959.103	8.68549	956.525	10.8837	950.593	29.9071	950.593	29.9071	100.895
-PENN J-4 Spot 289	242.698	91226.9	3.24041	14.123	0.804663	1.496	1.14458	0.153301	0.813993	0.711171	919.442	6.97496	928.759	6.96578	950.937	16.4837	950.937	16.4837	96.688
-PENN J-4 Spot 132	117.618	12945.7	5.49093	14.1083	0.997627	1.52542	1.61284	0.156154	1.26727	0.785742	935.366	11.0338	940.657	9.89212	953.051	20.4097	953.051	20.4097	98.1444
-PENN J-4 Spot 296	103.685	70006.2	2.49647	14.0549	0.897783	1.38554	1.363	0.141297	1.02556	0.752423	851.995	8.1849	882.801	8.03838	960.848	18.3552	960.848	18.3552	88.6712
-PENN J-4 Spot 93	51.344	9775	4.31172	13.9299	1.10729	1.49165	1.49494	0.150765	1.00437	0.671846	905.252	8.48257	926.988	9.08752	979.069	22.5598	979.069	22.5598	92.4605
-PENN J-4 Spot 17	52.9483	10850.9	2.33816	13.9178	0.929365	1.63692	1.31506	0.165305	0.930416	0.707506	986.192	8.5083	984.527	8.28928	980.834	18.91	980.834	18.91	100.546
-PENN J-4 Spot 201	148.962	8.13575e+07	2.43237	13.8902	0.931119	1.61405	1.36961	0.162672	1.00442	0.73336	971.611	9.05922	975.682	8.587	984.877	18.943	984.877	18.943	98.653
-PENN J-4 Spot 105	90.3321	8904.83	1.26539	13.8551	0.969139	1.59349	1.50677	0.160194	1.15375	0.765708	957.857	10.2694	967.664	9.40059	990.014	19.7117	990.014	19.7117	96.7518
-PENN J-4 Spot 51	80.937	5890.19	1.62109	13.8232	1.19491	1.63306	1.63127	0.163795	1.11052	0.680766	977.831	10.0755	983.041	10.2734	994.706	24.2876	994.706	24.2876	98.3035
-PENN J-4 Spot 46	173.568	23927.2	3.03489	13.8167	0.916766	1.66437	1.44485	0.166857	1.11675	0.772917	994.769	10.2943	995.044	9.16471	995.632	18.6298	995.632	18.6298	99.9134
-PENN J-4 Spot 96	30.6913	8446.32	0.82245	13.7733	1.43081	1.56543	2.20773	0.156445	1.68133	0.761564	936.988	14.6625	956.618	13.6797	1002.02	29.0356	1002.02	29.0356	93.51
-PENN J-4 Spot 41	111.042	19580.2	2.99507	13.7648	0.996443	1.73515	1.47638	0.173299	1.08941	0.73789	1030.26	10.3728	1021.66	9.51038	1003.28	20.2141	1003.28	20.2141	102.69
-PENN J-4 Spot 299	67.0502	10524	1.27313	13.7524	1.11566	1.63544	1.48111	0.163193	0.974158	0.657721	974.496	8.81044	983.957	9.33279	1005.1	22.6313	1005.1	22.6313	96.9549
-PENN J-4 Spot 214	161.993	9473.64	3.14986	13.7468	0.725467	1.71063	1.21233	0.170625	0.971305	0.801191	1015.56	9.1264	1012.52	7.76861	1005.94	14.7198	1005.94	14.7198	100.956
-PENN J-4 Spot 21	561.094	37700.8	4.13326	13.7231	0.716962	1.7653	1.67128	0.175775	1.50968	0.903309	1043.85	14.5492	1032.8	10.8336	1009.44	14.5206	1009.44	14.5206	103.41
-PENN J-4 Spot 175	164.955	67361.1	1.35215	13.7046	0.645899	1.66731	1.08036	0.165795	0.866022	0.801604	988.898	7.93954	996.163	6.85722	1012.17	13.0938	1012.17	13.0938	97.7008
-PENN J-4 Spot 180	28.4007	7659.36	0.827871	13.6562	1.76263	1.71243	1.93517	0.16968	0.798753	0.412757	1010.35	7.46955	1013.19	12.4058	1019.33	35.703	1019.33	35.703	99.119
-PENN J-4 Spot 227	165.468	42909.9	2.58077	13.6469	0.87349	1.72321	1.19994	0.170632	0.82272	0.685635	1015.59	7.73056	1017.22	7.71	1020.71	17.6834	1020.71	17.6834	99.4985
-PENN J-4 Spot 183	99.458	8266.65	2.08588	13.645	1.22117	1.82517	1.63436	0.180702	1.08623	0.664618	1070.81	10.7167	1054.55	10.7214	1021	24.7408	1021	24.7408	104.878
-PENN J-4 Spot 241	199.624	407606	2.76231	13.6377	0.684599	1.71685	1.20164	0.169888	0.987553	0.821838	1011.49	9.2448	1014.85	7.71044	1022.07	13.8566	1022.07	13.8566	98.9649
-PENN J-4 Spot 106	1149.2	138236	6.10057	13.6355	0.86696	1.74332	1.69722	0.17248	1.45909	0.859692	1025.76	13.8367	1024.69	10.9518	1022.4	17.5471	1022.4	17.5471	100.328
-PENN J-4 Spot 257	140.671	23238.9	3.60612	13.6336	0.822557	1.7313	1.24972	0.171265	0.940848	0.752848	1019.08	8.86855	1020.23	8.04366	1022.69	16.6476	1022.69	16.6476	99.6471
-PENN J-4 Spot 264	339.153	40927.9	0.956695	13.6061	0.68347	1.6885	1.39264	0.166695	1.21339	0.871288	993.876	11.176	1004.2	8.8812	1026.78	13.8235	1026.78	13.8235	96.7958
-PENN J-4 Spot 291	142.607	15195	3.04547	13.6041	0.872474	1.74924	1.28697	0.172666	0.94609	0.735129	1026.78	8.98013	1026.88	8.31468	1027.08	17.6654	1027.08	17.6654	99.9714
-PENN J-4 Spot 251	427.442	36579.4	8.01047	13.6025	0.638906	1.77604	1.62942	0.175291	1.49894	0.91992	1041.2	14.4117	1036.73	10.5854	1027.32	12.9218	1027.32	12.9218	101.351
-PENN J-4 Spot 55	73.3461	28219.3	3.27227	13.5984	1.04928	1.65849	1.39053	0.16364	0.91246	0.656196	976.974	8.27186	992.8	8.80844	1027.91	21.2377	1027.91	21.2377	95.0443
-PENN J-4 Spot 157	23.5072	4045.06	1.31061	13.5717	1.54889	1.81586	1.80755	0.178815	0.931757	0.515481	1060.5	9.1113	1051.2	11.8362	1031.9	31.324	1031.9	31.324	102.772
-PENN J-4 Spot 81	261.378	42267	2.72839	13.5626	0.587249	1.78489	1.09105	0.175647	0.919525	0.84279	1043.15	8.85617	1039.96	7.10043	1033.25	11.8846	1033.25	11.8846	100.958
-PENN J-4 Spot 261	94.8746	9231.78	3.26569	13.5603	0.906267	1.72878	1.30991	0.170097	0.945804	0.722037	1012.64	8.86327	1019.3	8.42661	1033.6	18.3298	1033.6	18.3298	97.973
-PENN J-4 Spot 1	96.5321	20856.1	1.83299	13.5585	0.730951	1.73419	1.21158	0.170607	0.966252	0.797512	1015.45	9.07808	1021.31	7.80296	1033.86	14.7873	1033.86	14.7873	98.2198
-PENN J-4 Spot 12	187.42	40175	3.20865	13.549	0.877603	1.7263	1.30775	0.169711	0.96955	0.741387	1010.52	9.06817	1018.37	8.40829	1035.28	17.7465	1035.28	17.7465	97.6084
-PENN J-4 Spot 56	302.564	16590.7	4.73475	13.544	0.711424	1.47571	1.35076	0.145022	1.14823	0.850061	872.997	9.37491	920.471	8.17559	1036.03	14.3881	1036.03	14.3881	84.2639
-PENN J-4 Spot 202	59.3493	3867.09	1.70017	13.5392	1.1098	1.74417	1.56682	0.171345	1.10601	0.705895	1019.52	10.4295	1025.01	10.1121	1036.74	22.4336	1036.74	22.4336	98.3391
-PENN J-4 Spot 155	43.4093	4523.36	1.22147	13.5259	1.01624	1.72132	1.59353	0.168933	1.22743	0.770258	1006.23	11.4351	1016.52	10.235	1038.73	20.5369	1038.73	20.5369	96.8716
-PENN J-4 Spot 242	55.4763	191411	3.79092	13.5211	1.03975	1.64925	1.45865	0.161803	1.02302	0.701351	966.791	9.18459	989.264	9.22054	1039.43	21.0086	1039.43	21.0086	93.0116
-PENN J-4 Spot 274	144.818	11478.2	1.69675	13.5206	0.927462	1.78207	1.43762	0.174828	1.09844	0.764067	1038.66	10.5373	1038.94	9.35069	1039.51	18.7425	1039.51	18.7425	99.9181
-PENN J-4 Spot 158	151.353	37802.9	2.78246	13.5158	1.1559	1.73049	1.60639	0.169706	1.11551	0.694425	1010.49	10.4331	1019.93	10.3377	1040.23	23.3513	1040.23	23.3513	97.1415
-PENN J-4 Spot 266	77.7645	48200.7	3.42186	13.5106	1.02139	1.71404	1.47776	0.168029	1.06796	0.722688	1001.24	9.90385	1013.8	9.47657	1041	20.6341	1041	20.6341	96.1808
-PENN J-4 Spot 149	203.499	33794.8	3.16031	13.51	0.871917	1.75784	1.43722	0.172315	1.14253	0.794956	1024.85	10.8259	1030.05	9.30201	1041.1	17.6163	1041.1	17.6163	98.4396
-PENN J-4 Spot 217	326.588	47510.3	2.38141	13.5021	0.836829	1.81827	1.43741	0.178134	1.1687	0.813061	1056.77	11.3913	1052.06	9.41669	1042.27	16.9054	1042.27	16.9054	101.392
-PENN J-4 Spot 25	76.9278	32739	2.72934	13.4892	0.976439	1.60631	1.54122	0.157218	1.19244	0.773701	941.297	10.4434	972.671	9.64517	1044.25	19.7167	1044.25	19.7167	90.141
-PENN J-4 Spot 40	77.7554	9451.49	2.82891	13.4828	1.2011	1.73514	1.48057	0.169748	0.865709	0.584712	1010.72	8.09846	1021.66	9.53735	1045.19	24.2451	1045.19	24.2451	96.7017
-PENN J-4 Spot 210	1422.4	270290	18.0818	13.4715	0.860319	1.73096	1.51369	0.169196	1.24544	0.822781	1007.68	11.6183	1020.11	9.74209	1046.89	17.3682	1046.89	17.3682	96.2549
-PENN J-4 Spot 117	210.906	53985.1	3.06479	13.4606	0.80196	1.79108	1.41578	0.174931	1.16675	0.824101	1039.22	11.1982	1042.22	9.22531	1048.52	16.1863	1048.52	16.1863	99.1129
-PENN J-4 Spot 195	264.781	69388	1.9133	13.4472	0.602535	1.77681	1.14438	0.173365	0.972914	0.850165	1030.62	9.26661	1037.01	7.43539	1050.53	12.1627	1050.53	12.1627	98.1051
-PENN J-4 Spot 206	413.976	39529.5	2.05692	13.4323	0.751563	1.79734	1.64029	0.175173	1.45798	0.888855	1040.55	14.01	1044.49	10.7017	1052.77	15.1605	1052.77	15.1605	98.8396
-PENN J-4 Spot 3	79.4525	354413	4.65024	13.4307	0.847845	1.6816	1.23924	0.163874	0.903817	0.729329	978.269	8.20356	1001.59	7.89086	1053	17.0995	1053	17.0995	92.9028
-PENN J-4 Spot 240	218.291	33265.3	2.94085	13.4197	0.713379	1.82065	1.28372	0.177279	1.06725	0.831375	1052.09	10.3601	1052.92	8.41372	1054.65	14.3871	1054.65	14.3871	99.7571
-PENN J-4 Spot 72	42.9071	22893.5	0.909688	13.4168	1.16306	1.77292	1.70612	0.172595	1.24825	0.731633	1026.39	11.844	1035.59	11.0766	1055.09	23.4366	1055.09	23.4366	97.2802
-PENN J-4 Spot 283	194.571	101757	2.72896	13.41	0.803779	1.76907	1.25448	0.172132	0.963148	0.767768	1023.85	9.11794	1034.18	8.13793	1056.11	16.2052	1056.11	16.2052	96.9449
-PENN J-4 Spot 192	275.495	3.27229e+06	2.75023	13.4068	0.842443	1.76781	1.1438	0.171969	0.773677	0.676407	1022.95	7.31832	1033.72	7.41802	1056.58	16.9827	1056.58	16.9827	96.8168
-PENN J-4 Spot 213	139.908	22324.5	0.808358	13.4039	0.890552	1.88793	1.35023	0.183614	1.01491	0.751656	1086.69	10.1494	1076.85	8.9629	1057.03	17.95	1057.03	17.95	102.806
-PENN J-4 Spot 156	27.3334	143700	1.70508	13.4035	1.60865	1.52925	2.04887	0.148725	1.26891	0.619321	893.813	10.5905	942.196	12.5792	1057.08	32.3913	1057.08	32.3913	84.5548
-PENN J-4 Spot 300	49.0898	16074.6	1.40478	13.389	1.28247	1.70429	1.65496	0.165569	1.04603	0.632054	987.649	9.57859	1010.14	10.5907	1059.27	25.814	1059.27	25.814	93.2384
-PENN J-4 Spot 131	162.63	20240.2	1.59606	13.3876	0.687865	1.66361	0.997999	0.1616	0.72308	0.724529	965.662	6.48469	994.752	6.32917	1059.48	13.8442	1059.48	13.8442	91.1451
-PENN J-4 Spot 250	85.7401	16678.7	2.95934	13.3853	0.871432	1.75255	1.44697	0.17021	1.15513	0.79831	1013.27	10.831	1028.1	9.35484	1059.83	17.5467	1059.83	17.5467	95.6067
-PENN J-4 Spot 249	205.584	31456.2	2.73672	13.3848	0.795834	1.75888	1.23775	0.170819	0.947985	0.765893	1016.62	8.91591	1030.43	8.01263	1059.9	16.0004	1059.9	16.0004	95.917
-PENN J-4 Spot 45	178.436	15522.7	4.81033	13.3785	0.662411	1.75308	1.1778	0.170175	0.973868	0.826855	1013.07	9.12985	1028.3	7.61538	1060.85	13.3294	1060.85	13.3294	95.4967
-PENN J-4 Spot 170	83.144	18631.8	2.92973	13.3756	0.878776	1.79844	1.34346	0.174541	1.01619	0.756396	1037.08	9.73467	1044.89	8.76689	1061.29	17.6623	1061.29	17.6623	97.7193
-PENN J-4 Spot 159	88.579	16954.1	1.57104	13.3628	0.979619	1.85079	1.47256	0.179449	1.09945	0.746622	1063.96	10.7834	1063.71	9.70752	1063.21	19.6864	1063.21	19.6864	100.071
-PENN J-4 Spot 13	180.551	38231.5	1.81945	13.362	0.664816	1.94815	1.04356	0.188878	0.804387	0.77081	1115.3	8.23813	1097.81	7.00209	1063.33	13.3617	1063.33	13.3617	104.888
-PENN J-4 Spot 23	50.6375	8571.09	1.65313	13.3462	1.13408	1.75357	1.42349	0.169812	0.860342	0.60439	1011.08	8.05086	1028.48	9.20496	1065.7	22.7854	1065.7	22.7854	94.8741
-PENN J-4 Spot 307	144.329	43713.2	55.88	13.3408	0.900697	1.84769	1.37539	0.178854	1.03944	0.755745	1060.71	10.1662	1062.61	9.06158	1066.53	18.0894	1066.53	18.0894	99.4546
-PENN J-4 Spot 49	119.423	11922.1	0.863027	13.3368	0.837318	1.84988	1.61381	0.179013	1.37959	0.854868	1061.58	13.5032	1063.39	10.6369	1067.12	16.8333	1067.12	16.8333	99.4814
-PENN J-4 Spot 161	160.221	36895.9	3.23001	13.3355	0.795419	1.77138	1.39196	0.171399	1.1423	0.820644	1019.82	10.7746	1035.03	9.03406	1067.32	15.9879	1067.32	15.9879	95.5494
-PENN J-4 Spot 238	241.441	74648.9	9.76071	13.3325	0.728895	1.7745	1.32382	0.171663	1.10509	0.83477	1021.27	10.4373	1036.17	8.59728	1067.77	14.6512	1067.77	14.6512	95.6451
-PENN J-4 Spot 173	354.649	813238	3.73186	13.3307	0.946876	1.86102	1.68881	0.180008	1.39839	0.828035	1067.02	13.7517	1067.35	11.1547	1068.04	19.0277	1068.04	19.0277	99.9045
-PENN J-4 Spot 116	401.452	71612.5	3.2184	13.3303	0.768065	1.91411	1.48636	0.185138	1.27254	0.856141	1094.98	12.8149	1086.02	9.91355	1068.1	15.4316	1068.1	15.4316	102.517
-PENN J-4 Spot 313	113.366	23319.7	2.70335	13.3266	0.813863	1.81407	1.17373	0.175413	0.845738	0.720555	1041.86	8.13626	1050.55	7.68292	1068.67	16.3394	1068.67	16.3394	97.4919
-PENN J-4 Spot 135	250.166	42645.4	3.57571	13.2983	0.700511	1.82576	1.23318	0.176168	1.0149	0.822992	1046	9.79935	1054.76	8.09046	1072.93	14.0599	1072.93	14.0599	97.4901
-PENN J-4 Spot 235	31.7332	5088.58	1.55578	13.2827	1.30364	1.79287	1.684	0.172792	1.06601	0.633023	1027.48	10.1247	1042.87	10.9771	1075.28	26.1774	1075.28	26.1774	95.5546
-PENN J-4 Spot 219	117.886	8385.2	4.16215	13.2774	0.868126	1.89009	1.27614	0.18209	0.93535	0.732955	1078.38	9.28812	1077.61	8.47439	1076.06	17.4111	1076.06	17.4111	100.216
-PENN J-4 Spot 120	1509.86	64442.9	10.8454	13.2729	0.850028	1.83217	1.68353	0.176449	1.45318	0.863173	1047.54	14.0502	1057.06	11.059	1076.77	17.0522	1076.77	17.0522	97.2854
-PENN J-4 Spot 262	96.7879	11687.5	2.24815	13.2442	1.08779	1.81676	1.45442	0.174586	0.965427	0.663788	1037.33	9.25044	1051.52	9.52533	1081.08	21.8229	1081.08	21.8229	95.9527
-PENN J-4 Spot 110	292.956	86731.7	1.49496	13.2421	0.832788	1.94847	1.14884	0.187214	0.791387	0.688859	1106.26	8.04482	1097.92	7.70893	1081.4	16.7064	1081.4	16.7064	102.299
-PENN J-4 Spot 194	229.172	20522.5	1.5215	13.2386	0.897201	1.8854	1.27725	0.181107	0.909064	0.711736	1073.02	8.98586	1075.97	8.47449	1081.96	17.9969	1081.96	17.9969	99.1741
-PENN J-4 Spot 193	117.531	32921.7	2.93495	13.2297	0.946343	1.77295	1.38828	0.17019	1.01575	0.731663	1013.16	9.52321	1035.6	9.01306	1083.28	18.9784	1083.28	18.9784	93.5265
-PENN J-4 Spot 222	59.2511	22264.6	1.31092	13.2195	0.893556	1.79385	1.34736	0.172063	1.00843	0.748451	1023.47	9.5434	1043.23	8.78431	1084.86	17.8973	1084.86	17.8973	94.3412
-PENN J-4 Spot 285	180.876	20408.4	2.47214	13.2102	0.640663	1.90654	1.32269	0.182743	1.15718	0.874867	1081.94	11.5258	1083.37	8.80987	1086.27	12.824	1086.27	12.824	99.6021
-PENN J-4 Spot 139	86.6994	16091.5	2.70564	13.2008	0.890835	1.78694	1.36219	0.171159	1.03052	0.756519	1018.49	9.70868	1040.71	8.86874	1087.67	17.8348	1087.67	17.8348	93.6398
-PENN J-4 Spot 162	124.848	29476	2.94562	13.1896	0.916139	1.85398	1.33246	0.177429	0.967543	0.726133	1052.91	9.39893	1064.85	8.7892	1089.36	18.3372	1089.36	18.3372	96.6539
-PENN J-4 Spot 101	73.1729	12617.2	1.28775	13.1809	1.00339	1.86063	1.45784	0.177948	1.0576	0.725457	1055.75	10.2993	1067.21	9.62834	1090.68	20.0815	1090.68	20.0815	96.7979
-PENN J-4 Spot 278	85.6853	15335	2.94327	13.1761	0.712342	1.84748	1.18289	0.176627	0.944346	0.79834	1048.52	9.13833	1062.53	7.79292	1091.44	14.2626	1091.44	14.2626	96.0673
-PENN J-4 Spot 47	516.507	145080	5.17342	13.1751	0.843181	1.88778	1.61502	0.180465	1.37743	0.852891	1069.51	13.5747	1076.8	10.7204	1091.6	16.8703	1091.6	16.8703	97.9763
-PENN J-4 Spot 140	78.3138	43413.2	2.87448	13.1731	0.862847	1.78208	1.29922	0.170334	0.971318	0.747618	1013.95	9.11323	1038.94	8.45043	1091.9	17.2639	1091.9	17.2639	92.861
-PENN J-4 Spot 171	453.514	23519.5	1.99371	13.1725	0.754996	1.9576	1.38928	0.187103	1.16623	0.839446	1105.66	11.8493	1101.06	9.3372	1091.99	15.118	1091.99	15.118	101.252
-PENN J-4 Spot 279	282.303	37293.2	2.14912	13.165	0.823489	1.96446	1.66451	0.187652	1.44653	0.869045	1108.64	14.7337	1103.41	11.2004	1093.13	16.4795	1093.13	16.4795	101.419
-PENN J-4 Spot 200	134.527	55399.9	2.69357	13.1024	0.844164	1.8455	1.36083	0.17545	1.06736	0.784342	1042.07	10.2702	1061.83	8.96194	1102.63	16.8916	1102.63	16.8916	94.5076
-PENN J-4 Spot 215	504.051	371869	3.1411	13.0916	0.796842	2.01359	1.47863	0.191273	1.24555	0.842367	1128.27	12.8921	1120.1	10.0321	1104.28	15.9315	1104.28	15.9315	102.172
-PENN J-4 Spot 282	113.178	50837.3	2.43329	13.0806	0.991296	1.89343	1.50709	0.179706	1.13519	0.753233	1065.37	11.1475	1078.78	10.0143	1105.97	19.8155	1105.97	19.8155	96.3293
-PENN J-4 Spot 67	1481.76	110452	29.0748	13.0673	0.838714	1.92625	1.3402	0.182636	1.04533	0.779975	1081.36	10.4065	1090.24	8.95804	1107.99	16.7411	1107.99	16.7411	97.5962
-PENN J-4 Spot 98	79.7573	13252.2	3.73041	13.0589	0.899566	1.89264	1.22612	0.179335	0.833163	0.679509	1063.34	8.16724	1078.51	8.14605	1109.28	17.9704	1109.28	17.9704	95.8586
-PENN J-4 Spot 14	48.7341	33638.2	4.18301	13.043	1.1619	1.89345	1.54782	0.179192	1.0226	0.660674	1062.56	10.0175	1078.79	10.285	1111.72	23.2232	1111.72	23.2232	95.5774
-PENN J-4 Spot 270	141.532	39098.8	2.3205	13.0302	0.801367	1.85921	1.34463	0.175779	1.07974	0.803001	1043.87	10.4058	1066.7	8.87819	1113.72	16.003	1113.72	16.003	93.7284
-PENN J-4 Spot 234	234.937	27742.7	5.8632	13.0225	0.634391	1.99395	1.15792	0.188406	0.968673	0.836563	1112.73	9.89978	1113.46	7.83045	1114.9	12.6503	1114.9	12.6503	99.8054
-PENN J-4 Spot 226	889.619	140558	3.3962	12.9996	0.627905	2.04436	1.44073	0.19283	1.2967	0.900032	1136.69	13.5131	1130.42	9.82399	1118.41	12.5448	1118.41	12.5448	101.634
-PENN J-4 Spot 78	73.4357	7293.23	1.7975	12.9853	1.01558	1.95766	1.3404	0.18445	0.8748	0.652641	1091.24	8.7819	1101.08	9.00875	1120.58	20.2498	1120.58	20.2498	97.3817
-PENN J-4 Spot 208	950.028	135936	5.53874	12.9784	0.676719	2.0639	1.36531	0.194355	1.1858	0.868521	1144.92	12.4392	1136.91	9.33872	1121.63	13.5132	1121.63	13.5132	102.076
-PENN J-4 Spot 111	132.208	107636	3.56997	12.9586	0.641223	1.95501	1.23354	0.183821	1.05378	0.854273	1087.81	10.5481	1100.17	8.2867	1124.67	12.7878	1124.67	12.7878	96.7227
-PENN J-4 Spot 59	197.319	27348	3.35547	12.9425	0.775973	2.01086	1.52527	0.188837	1.31314	0.860918	1115.07	13.446	1119.18	10.3439	1127.16	15.4787	1127.16	15.4787	98.9274
-PENN J-4 Spot 63	63.9374	488034	1.65714	12.9401	1.07095	1.78616	1.42197	0.167705	0.935455	0.657857	999.456	8.66074	1040.43	9.25651	1127.52	21.3552	1127.52	21.3552	88.6422
-PENN J-4 Spot 239	427.304	29203.3	4.64373	12.9275	0.71573	2.03869	1.32806	0.191228	1.1187	0.842352	1128.02	11.5768	1128.52	9.04741	1129.49	14.2511	1129.49	14.2511	99.8704
-PENN J-4 Spot 276	110.314	22627.9	5.75208	12.9165	0.866172	1.91127	1.39694	0.179125	1.09599	0.784562	1062.19	10.733	1085.03	9.31234	1131.15	17.2342	1131.15	17.2342	93.9038
-PENN J-4 Spot 303	67.2339	6268.95	3.59511	12.9163	0.981067	1.93206	1.4185	0.18107	1.02453	0.72226	1072.82	10.1254	1092.25	9.49118	1131.18	19.536	1131.18	19.536	94.8409
-PENN J-4 Spot 143	784.735	380577	3.99768	12.8791	0.500286	1.95474	1.27262	0.182668	1.17016	0.919489	1081.53	11.651	1100.08	8.54887	1136.96	9.94683	1136.96	9.94683	95.1248
-PENN J-4 Spot 15	181.376	23222.7	3.34042	12.8541	0.770236	2.13976	1.21236	0.19957	0.936239	0.772247	1173.01	10.0409	1161.75	8.38954	1140.81	15.2971	1140.81	15.2971	102.823
-PENN J-4 Spot 8	366.412	33853.3	3.51064	12.8414	0.804434	2.13409	1.4733	0.198844	1.2343	0.837779	1169.11	13.1974	1159.91	10.1868	1142.8	15.9829	1142.8	15.9829	102.302
-PENN J-4 Spot 5	407.365	188055	1.77401	12.8412	0.687189	2.11169	1.33378	0.196754	1.14313	0.857059	1157.86	12.1152	1152.63	9.19093	1142.82	13.661	1142.82	13.661	101.315
-PENN J-4 Spot 218	107.992	7422.36	2.58013	12.8326	1.06802	2.01065	1.4615	0.187213	0.997657	0.682623	1106.26	10.1416	1119.11	9.91105	1144.14	21.2167	1144.14	21.2167	96.6893
-PENN J-4 Spot 75	79.0113	14295.1	3.24772	12.8048	1.02982	1.9943	1.44784	0.18529	1.0177	0.70291	1095.81	10.2557	1113.58	9.79168	1148.44	20.4634	1148.44	20.4634	95.4173
-PENN J-4 Spot 169	262.302	64336.4	4.63566	12.8043	0.779518	2.04883	1.365	0.190348	1.12053	0.820898	1123.26	11.5509	1131.91	9.31425	1148.55	15.4826	1148.55	15.4826	97.7984
-PENN J-4 Spot 65	670.302	76016.5	4.04334	12.7586	0.665191	2.21175	1.65187	0.204751	1.51202	0.915337	1200.79	16.5655	1184.76	11.551	1155.6	13.217	1155.6	13.217	103.91
-PENN J-4 Spot 292	588.341	98956.3	7.2518	12.7532	0.737417	2.14222	1.43855	0.198231	1.23517	0.85862	1165.81	13.1727	1162.54	9.95854	1156.44	14.648	1156.44	14.648	100.81
-PENN J-4 Spot 134	163.454	41819.3	2.53839	12.7519	1.02344	1.96195	1.41107	0.181531	0.971439	0.688442	1075.33	9.62144	1102.55	9.49076	1156.64	20.3043	1156.64	20.3043	92.9708
-PENN J-4 Spot 113	93.3531	16690.3	2.89029	12.7301	0.916763	2.08738	1.4918	0.192807	1.17686	0.788889	1136.56	12.263	1144.67	10.2416	1160.03	18.1975	1160.03	18.1975	97.9767
-PENN J-4 Spot 144	57.8629	16840.2	1.95196	12.7177	1.06248	2.15055	1.66139	0.198448	1.27724	0.768778	1166.98	13.6338	1165.23	11.5155	1161.97	21.0771	1161.97	21.0771	100.431
-PENN J-4 Spot 114	267.904	32624.6	2.08887	12.7135	0.69996	2.19663	1.33361	0.202633	1.13516	0.851189	1189.45	12.3297	1179.97	9.30544	1162.62	13.8787	1162.62	13.8787	102.308
-PENN J-4 Spot 243	418.608	48824.4	2.91249	12.7057	0.594634	2.05933	1.32965	0.18985	1.18928	0.894429	1120.56	12.2327	1135.4	9.08824	1163.84	11.8029	1163.84	11.8029	96.2812
-PENN J-4 Spot 306	178.881	34044.6	3.37287	12.693	0.803195	2.10159	1.30478	0.193552	1.02827	0.788076	1140.59	10.7493	1149.33	8.97724	1165.83	15.9317	1165.83	15.9317	97.835
-PENN J-4 Spot 312	97.3353	15767.1	4.46796	12.6871	0.826089	2.10052	1.24667	0.193365	0.933682	0.748941	1139.58	9.75264	1148.98	8.57599	1166.74	16.3829	1166.74	16.3829	97.6719
-PENN J-4 Spot 29	275.293	14066.3	1.88484	12.6737	1.03727	2.03469	1.41053	0.187106	0.955861	0.67766	1105.68	9.71207	1127.19	9.60305	1168.88	20.528	1168.88	20.528	94.5933
-PENN J-4 Spot 174	31.2106	8173.39	2.17931	12.6694	1.03073	2.03476	1.59932	0.18705	1.22288	0.764624	1105.38	12.422	1127.21	10.8886	1169.55	20.4106	1169.55	20.4106	94.5132
-PENN J-4 Spot 314	78.9516	22543.6	1.57029	12.6517	0.823461	2.06946	1.30947	0.189974	1.01814	0.777525	1121.23	10.4781	1138.75	8.96459	1172.31	16.2984	1172.31	16.2984	95.6427
-PENN J-4 Spot 172	186.761	137869	2.13471	12.647	0.733701	2.11381	1.11424	0.193973	0.838581	0.752602	1142.86	8.78234	1153.32	7.68054	1173.05	14.5194	1173.05	14.5194	97.4266
-PENN J-4 Spot 271	340.943	177097	3.8151	12.6313	0.719711	2.14356	1.49741	0.196458	1.3131	0.876919	1156.26	13.8992	1162.97	10.3681	1175.51	14.2392	1175.51	14.2392	98.3626
-PENN J-4 Spot 130	142.69	39201.5	2.13543	12.6294	0.733914	2.26653	1.26755	0.207698	1.03346	0.815326	1216.54	11.4575	1201.94	8.9306	1175.8	14.5368	1175.8	14.5368	103.465
-PENN J-4 Spot 244	176.616	32704.7	2.88182	12.6253	0.800234	2.14326	1.28893	0.196338	1.01044	0.78393	1155.62	10.69	1162.88	8.92415	1176.44	15.8369	1176.44	15.8369	98.2299
-PENN J-4 Spot 176	78.5612	14224	2.67817	12.6186	1.07115	2.12099	1.47494	0.194195	1.01395	0.68745	1144.06	10.6291	1155.66	10.1781	1177.49	21.1879	1177.49	21.1879	97.1605
-PENN J-4 Spot 125	72.9982	8958.15	2.41517	12.6153	3.20075	1.73094	3.38137	0.158441	1.09033	0.322454	948.107	9.61329	1020.1	21.765	1178.01	63.2973	1178.01	63.2973	80.4835
-PENN J-4 Spot 163	359.895	112984	2.5135	12.6115	0.478081	2.13966	1.31223	0.195794	1.22204	0.931271	1152.69	12.8988	1161.72	9.08059	1178.61	9.446	1178.61	9.446	97.8001
-PENN J-4 Spot 129	279.135	59558	2.66519	12.5982	0.689938	2.28263	1.46261	0.208657	1.28965	0.88175	1221.66	14.3523	1206.93	10.3273	1180.69	13.6586	1180.69	13.6586	103.469
-PENN J-4 Spot 109	106.963	28393	3.498	12.5848	0.781128	2.13847	1.19644	0.195272	0.906259	0.757464	1149.87	9.54428	1161.33	8.27781	1182.79	15.44	1182.79	15.44	97.2166
-PENN J-4 Spot 133	237.853	73334.6	3.07412	12.5829	0.711409	2.12139	1.33898	0.193681	1.13436	0.84718	1141.28	11.865	1155.79	9.24034	1183.1	14.0573	1183.1	14.0573	96.4654
-PENN J-4 Spot 160	227.984	36517.1	3.57796	12.5769	0.742228	2.17075	1.16899	0.198094	0.903124	0.772569	1165.07	9.62602	1171.72	8.12639	1184.04	14.6517	1184.04	14.6517	98.3981
-PENN J-4 Spot 76	43.892	15672.7	1.68834	12.5542	0.934599	2.26103	1.27221	0.205961	0.863163	0.678474	1207.26	9.50305	1200.23	8.95679	1187.56	18.4579	1187.56	18.4579	101.659
-PENN J-4 Spot 122	226.665	36027.5	1.69627	12.5229	0.749555	2.19487	1.3083	0.199435	1.0723	0.81961	1172.28	11.4937	1179.41	9.12652	1192.5	14.7799	1192.5	14.7799	98.3045
-PENN J-4 Spot 153	96.242	237393	3.74193	12.5218	0.65975	2.10505	1.15759	0.191257	0.951178	0.82169	1128.18	9.84446	1150.46	7.96868	1192.71	13.02	1192.71	13.02	94.5896
-PENN J-4 Spot 108	151.196	51343.4	1.14282	12.4829	0.812593	2.165	1.28686	0.196093	0.997851	0.775414	1154.3	10.5459	1169.88	8.93836	1198.83	16.0209	1198.83	16.0209	96.2855
-PENN J-4 Spot 236	401.102	72062.3	11.4842	12.4208	0.895407	2.21799	1.42816	0.199892	1.11261	0.779048	1174.74	11.9485	1186.74	9.99532	1208.64	17.6194	1208.64	17.6194	97.1956
-PENN J-4 Spot 268	86.3418	11299.1	3.01499	12.3584	0.657468	2.30166	1.18295	0.206391	0.983411	0.831324	1209.56	10.8457	1212.8	8.37362	1218.55	12.9265	1218.55	12.9265	99.2625
-PENN J-4 Spot 100	10.0418	1733.87	2.0681	12.3293	2.26568	2.42798	2.65522	0.217205	1.38452	0.521434	1267.09	15.9267	1250.92	19.098	1223.18	44.5022	1223.18	44.5022	103.59
-PENN J-4 Spot 260	278.474	76044.9	1.08107	12.3176	0.615609	2.22875	1.03573	0.199194	0.832924	0.80419	1170.99	8.9189	1190.13	7.25957	1225.04	12.074	1225.04	12.074	95.5882
-PENN J-4 Spot 22	210.443	38413.7	2.6294	12.2917	0.771828	2.32202	1.37989	0.207094	1.14385	0.828939	1213.32	12.6507	1219.04	9.79383	1229.21	15.1556	1229.21	15.1556	98.7072
-PENN J-4 Spot 182	234.675	18522.4	2.46689	12.2655	0.882065	2.09121	1.34029	0.186111	1.00912	0.752916	1100.27	10.2073	1145.92	9.2068	1233.4	17.3057	1233.4	17.3057	89.2068
-PENN J-4 Spot 253	176.984	32633.4	2.78269	12.2639	0.779227	2.45648	1.13274	0.218589	0.822136	0.725793	1274.41	9.50676	1259.33	8.17427	1233.66	15.2907	1233.66	15.2907	103.303
-PENN J-4 Spot 209	130.409	85022.3	2.24451	12.1156	0.795085	2.41666	1.36233	0.212446	1.10625	0.812027	1241.83	12.4956	1247.56	9.78455	1257.47	15.5457	1257.47	15.5457	98.7564
-PENN J-4 Spot 0	173.265	18655.5	1.98605	11.965	0.954094	2.46728	1.43991	0.214199	1.07844	0.748966	1251.15	12.2643	1262.5	10.4042	1281.86	18.5892	1281.86	18.5892	97.6042
-PENN J-4 Spot 228	317.38	38441.8	2.70322	11.9227	0.734841	2.54002	1.29753	0.219735	1.06939	0.824173	1280.48	12.4191	1283.58	9.45347	1288.75	14.3034	1288.75	14.3034	99.3578
-PENN J-4 Spot 7	209.792	115082	2.45111	11.8192	0.693592	2.53045	1.0714	0.217006	0.816599	0.762177	1266.03	9.38656	1280.83	7.79756	1305.72	13.469	1305.72	13.469	96.961
-PENN J-4 Spot 207	113.403	20883.9	1.74076	11.7829	0.712607	2.54418	1.20283	0.217514	0.969019	0.805614	1268.72	11.16	1284.77	8.76754	1311.68	13.8263	1311.68	13.8263	96.725
-PENN J-4 Spot 36	335.581	45552.9	2.59903	11.7806	0.659366	2.64905	1.23771	0.226436	1.04745	0.846284	1315.79	12.4667	1314.38	9.12367	1312.06	12.7932	1312.06	12.7932	100.285
-PENN J-4 Spot 77	76.5191	9839.88	2.17616	11.7436	0.878543	2.53603	1.2461	0.216094	0.883702	0.709174	1261.2	10.1228	1282.43	9.07472	1318.16	17.0304	1318.16	17.0304	95.6788
-PENN J-4 Spot 248	77.2076	26732	2.19457	11.7277	0.736495	2.56006	1.37712	0.217846	1.16363	0.844974	1270.48	13.4182	1289.31	10.0556	1320.78	14.2714	1320.78	14.2714	96.1916
-PENN J-4 Spot 247	189.911	25827.5	1.2268	11.693	0.68432	2.56162	1.22885	0.217334	1.02067	0.830593	1267.77	11.7469	1289.76	8.97443	1326.53	13.2506	1326.53	13.2506	95.5703
-PENN J-4 Spot 273	232.257	1.30035e+07	1.40527	11.6786	0.71702	2.68968	1.22187	0.227917	0.989368	0.809716	1323.57	11.8382	1325.62	9.04437	1328.92	13.8778	1328.92	13.8778	99.5979
-PENN J-4 Spot 19	133.132	43046.9	3.30285	11.669	0.819414	2.59919	1.3769	0.220069	1.10654	0.803642	1282.24	12.8665	1300.41	10.0967	1330.51	15.8572	1330.51	15.8572	96.3721
-PENN J-4 Spot 4	487.165	40412.3	8.28078	11.6685	0.739629	2.57787	1.60503	0.218254	1.42445	0.887494	1272.64	16.451	1294.38	11.7427	1330.59	14.3121	1330.59	14.3121	95.6452
-PENN J-4 Spot 288	181.954	31915.8	2.4496	11.6616	0.822462	2.71426	1.36325	0.229666	1.0872	0.797507	1332.75	13.09	1332.36	10.1158	1331.73	15.9122	1331.73	15.9122	100.076
-PENN J-4 Spot 43	31.3936	7790.81	0.85836	11.6393	1.03834	2.64092	1.62955	0.223034	1.25591	0.770705	1297.89	14.7642	1312.11	12.0023	1335.42	20.0782	1335.42	20.0782	97.1894
-PENN J-4 Spot 199	68.0617	7307.99	2.77127	11.5694	1.11978	2.76089	1.73549	0.231765	1.3259	0.763992	1343.75	16.0823	1345.03	12.937	1347.06	21.6188	1347.06	21.6188	99.7536
-PENN J-4 Spot 304	74.1091	122645	5.9518	11.5534	1.03515	2.86247	1.73769	0.23996	1.39572	0.803203	1386.49	17.412	1372.09	13.0768	1349.74	19.9778	1349.74	19.9778	102.723
-PENN J-4 Spot 24	87.057	8119.28	2.17206	11.5419	0.944292	2.77798	1.44536	0.232646	1.09425	0.757077	1348.35	13.3135	1349.64	10.7918	1351.65	18.2197	1351.65	18.2197	99.7557
-PENN J-4 Spot 255	652.245	4537.71	3.13146	11.401	1.49663	2.3039	1.9925	0.190588	1.31536	0.660155	1124.56	13.5737	1213.49	14.1089	1375.32	28.7816	1375.32	28.7816	81.7674
-PENN J-4 Spot 280	108.519	17315.3	3.36243	11.39	0.790046	2.93145	1.10475	0.242267	0.772199	0.698983	1398.47	9.70793	1390.07	8.36434	1377.18	15.1882	1377.18	15.1882	101.546
-PENN J-4 Spot 263	105.262	40429.1	2.37878	11.3802	0.949806	2.62925	1.41383	0.217104	1.04728	0.740736	1266.56	12.0426	1308.86	10.4006	1378.84	18.2569	1378.84	18.2569	91.8569
-PENN J-4 Spot 211	154.521	484841	1.56556	11.3671	0.950267	2.85111	1.37915	0.235154	0.999527	0.72474	1361.45	12.2672	1369.1	10.3678	1381.04	18.2589	1381.04	18.2589	98.5818
-PENN J-4 Spot 99	245.135	49437.9	4.37212	11.3408	0.697062	2.87724	1.29082	0.236759	1.08643	0.841656	1369.83	13.4073	1375.97	9.72665	1385.5	13.3854	1385.5	13.3854	98.8688
-PENN J-4 Spot 269	189.378	42545.2	3.73948	11.3404	0.863097	2.90439	1.36916	0.238985	1.06285	0.776282	1381.42	13.2159	1383.06	10.3419	1385.57	16.5736	1385.57	16.5736	99.7003
-PENN J-4 Spot 102	478.769	77848.8	6.4766	11.1161	0.520529	3.018	1.25694	0.243422	1.14409	0.91022	1404.46	14.4385	1412.18	9.58665	1423.82	9.94347	1423.82	9.94347	98.6404
-PENN J-4 Spot 265	292.24	173503	1.62927	11.0732	0.726691	3.14661	1.27059	0.252814	1.04227	0.820301	1452.97	13.5585	1444.17	9.79036	1431.21	13.8679	1431.21	13.8679	101.521
-PENN J-4 Spot 66	200.165	41406.3	2.07829	10.9509	0.7492	3.20864	1.21449	0.254951	0.955871	0.787054	1463.96	12.5184	1459.25	9.40191	1452.37	14.2566	1452.37	14.2566	100.798
-PENN J-4 Spot 138	611.067	63517.6	2.51983	10.9112	0.462258	3.09087	1.62897	0.244703	1.56201	0.958892	1411.1	19.796	1430.43	12.4977	1459.28	8.78812	1459.28	8.78812	96.6981
-PENN J-4 Spot 223	282.206	26550.1	5.28238	10.8641	0.845806	3.2466	1.35189	0.255922	1.05462	0.780107	1468.95	13.8535	1468.36	10.4948	1467.5	16.0623	1467.5	16.0623	100.098
-PENN J-4 Spot 295	329.021	43907.7	1.3079	10.8496	0.561675	3.31538	1.04487	0.260998	0.88106	0.843227	1494.94	11.7556	1484.68	8.15106	1470.03	10.6628	1470.03	10.6628	101.695
-PENN J-4 Spot 284	118.18	23552	3.34553	10.8444	0.815216	3.16342	1.2972	0.248914	1.00904	0.777858	1432.87	12.9642	1448.28	10.0083	1470.94	15.4742	1470.94	15.4742	97.4118
-PENN J-4 Spot 267	168.086	116418	3.09721	10.8135	0.703324	3.30148	1.12573	0.259037	0.878979	0.780808	1484.91	11.6579	1481.4	8.77336	1476.36	13.3406	1476.36	13.3406	100.579
-PENN J-4 Spot 301	195.291	76447.7	1.8864	10.8025	0.610068	3.23192	1.13345	0.253323	0.955257	0.84279	1455.59	12.4466	1464.85	8.78951	1478.28	11.5687	1478.28	11.5687	98.4649
-PENN J-4 Spot 26	220.705	45428.6	2.28236	10.7926	0.817223	3.42395	1.25773	0.268127	0.95605	0.760139	1531.29	13.031	1509.91	9.88435	1480.03	15.4934	1480.03	15.4934	103.464
-PENN J-4 Spot 232	454.451	392510	1.78894	10.7722	0.57913	3.3557	1.45039	0.262288	1.32975	0.916823	1501.53	17.8118	1494.12	11.3464	1483.6	10.9742	1483.6	10.9742	101.209
-PENN J-4 Spot 190	686.732	43327.4	3.79318	10.7436	0.704568	3.04503	1.27318	0.237371	1.06045	0.83292	1373.01	13.1141	1418.99	9.73199	1488.65	13.3422	1488.65	13.3422	92.232
-PENN J-4 Spot 61	48.9307	17439.8	1.64656	10.735	0.938953	3.20863	1.45778	0.249924	1.11512	0.764943	1438.08	14.3735	1459.24	11.2854	1490.17	17.7772	1490.17	17.7772	96.5047
-PENN J-4 Spot 84	403.864	33306.6	13.9442	10.7048	0.731242	3.20093	1.58626	0.248625	1.40766	0.887407	1431.38	18.0688	1457.39	12.2731	1495.49	13.8347	1495.49	13.8347	95.7133
-PENN J-4 Spot 64	156.278	50715.5	1.44652	10.6886	0.801961	3.5104	1.22569	0.27225	0.926918	0.756241	1552.21	12.7866	1529.56	9.68648	1498.35	15.1669	1498.35	15.1669	103.595
-PENN J-4 Spot 97	172.06	31265.4	2.70637	10.6618	0.742978	3.39429	1.19878	0.262582	0.940769	0.784775	1503.04	12.6127	1503.08	9.40243	1503.11	14.0424	1503.11	14.0424	99.9951
-PENN J-4 Spot 246	266.415	25796.5	2.93883	10.6193	0.670874	3.35696	1.23079	0.258659	1.03188	0.838388	1482.98	13.67	1494.41	9.62921	1510.66	12.6653	1510.66	12.6653	98.1675
-PENN J-4 Spot 87	450.27	87162.4	3.76729	10.6017	0.818667	3.35953	1.61501	0.25843	1.39214	0.861998	1481.8	18.4296	1495.01	12.6377	1513.78	15.4495	1513.78	15.4495	97.8876
-PENN J-4 Spot 259	40.7369	41401.6	1.81952	10.5769	6.83269	1.18313	6.93392	0.0907986	1.18048	0.170248	560.259	6.33451	792.769	38.1738	1518.19	129.024	1518.19	129.024	36.903
-PENN J-4 Spot 80	101.318	14226	1.63368	10.346	0.910637	3.52162	1.52382	0.264365	1.22179	0.801795	1512.14	16.4683	1532.08	12.0513	1559.71	17.0814	1559.71	17.0814	96.95
-PENN J-4 Spot 94	95.9213	13077.8	1.99216	10.2527	0.87781	3.80474	1.46062	0.283042	1.16742	0.799261	1606.66	16.6018	1593.75	11.7447	1576.69	16.429	1576.69	16.429	101.901
-PENN J-4 Spot 69	394.155	722185	0.768273	10.2221	0.791053	3.69923	1.53	0.27437	1.30964	0.855969	1562.95	18.1766	1571.2	12.23	1582.29	14.7942	1582.29	14.7942	98.7777
-PENN J-4 Spot 30	302.411	100808	2.53736	10.0026	0.974588	4.03038	1.43153	0.292514	1.04855	0.732469	1654.08	15.2975	1640.35	11.6465	1622.77	18.1317	1622.77	18.1317	101.929
-PENN J-4 Spot 82	785.62	46523.2	4.59057	9.97334	0.720716	3.99391	1.5419	0.289019	1.36309	0.884035	1636.63	19.7021	1632.96	12.5218	1628.22	13.3985	1628.22	13.3985	100.516
-PENN J-4 Spot 34	217.751	163922	4.23651	9.93889	0.670658	3.9023	1.26318	0.281414	1.07044	0.847417	1598.48	15.1544	1614.16	10.2101	1634.65	12.4591	1634.65	12.4591	97.7874
-PENN J-4 Spot 187	254.338	41097.4	1.1128	9.92542	0.801026	4.17494	1.61825	0.300668	1.4061	0.868897	1694.62	20.9534	1669.11	13.257	1637.17	14.8763	1637.17	14.8763	103.509
-PENN J-4 Spot 62	364.647	143902	0.813647	9.91221	0.693732	4.03607	1.17962	0.29028	0.954064	0.80879	1642.93	13.8366	1641.49	9.59957	1639.64	12.8795	1639.64	12.8795	100.2
-PENN J-4 Spot 272	94.0943	13882.8	1.79723	9.91135	0.61967	4.00774	1.25993	0.288217	1.09701	0.870691	1632.61	15.8219	1635.77	10.2388	1639.8	11.5043	1639.8	11.5043	99.5616
-PENN J-4 Spot 126	249.066	68170	3.48941	9.88459	0.673172	3.98327	1.20505	0.285684	0.999491	0.829419	1619.93	14.3169	1630.79	9.78078	1644.82	12.4895	1644.82	12.4895	98.4865
-PENN J-4 Spot 91	151.601	40643.8	1.86853	9.8701	0.946547	4.05441	1.52507	0.29036	1.19578	0.784081	1643.33	17.3458	1645.18	12.4222	1647.54	17.5538	1647.54	17.5538	99.7441
-PENN J-4 Spot 10	162.428	34247.1	2.08037	9.85007	0.880791	3.61267	1.37807	0.2582	1.05985	0.769082	1480.62	14.0206	1552.32	10.9596	1651.31	16.3263	1651.31	16.3263	89.6636
-PENN J-4 Spot 185	61.0951	228718	1.99096	9.81078	0.882052	3.82872	1.5505	0.272549	1.27516	0.822419	1553.73	17.6057	1598.8	12.4837	1658.72	16.3342	1658.72	16.3342	93.6705
-PENN J-4 Spot 166	101.699	13456.8	1.54818	9.80949	0.606686	3.88149	1.17014	0.276269	1.00058	0.855093	1572.54	13.9624	1609.84	9.44769	1658.96	11.2339	1658.96	11.2339	94.7911
-PENN J-4 Spot 196	232.122	118085	3.83355	9.79817	0.789995	4.12393	1.186	0.293187	0.884597	0.745864	1657.43	12.9285	1659.06	9.69253	1661.1	14.6248	1661.1	14.6248	99.7795
-PENN J-4 Spot 308	267.416	61192.7	1.37014	9.75444	0.763031	4.12088	1.81537	0.291662	1.64723	0.907378	1649.83	23.9776	1658.45	14.8345	1669.37	14.1107	1669.37	14.1107	98.8294
-PENN J-4 Spot 145	184.33	700739	1.69202	9.74349	0.678614	4.0644	1.10708	0.287342	0.87471	0.790103	1628.23	12.586	1647.19	9.02174	1671.45	12.546	1671.45	12.546	97.4144
-PENN J-4 Spot 277	48.9334	16632.3	1.66487	9.73575	0.740281	3.96741	1.2212	0.280262	0.971247	0.79532	1592.68	13.7061	1627.56	9.90396	1672.92	13.6837	1672.92	13.6837	95.2039
-PENN J-4 Spot 141	160.236	965151	2.08313	9.70768	0.598381	4.11808	1.12821	0.290067	0.956453	0.84776	1641.86	13.8633	1657.9	9.21765	1678.25	11.0546	1678.25	11.0546	97.8316
-PENN J-4 Spot 33	148.011	233026	2.48242	9.69186	0.698481	4.21234	1.24032	0.296222	1.02494	0.826356	1672.55	15.0993	1676.43	10.1781	1681.27	12.8989	1681.27	12.8989	99.4815
-PENN J-4 Spot 179	864.988	22775.3	6.25225	9.67921	0.910219	4.00505	1.61133	0.281278	1.32962	0.82517	1597.8	18.8166	1635.22	13.093	1683.68	16.8041	1683.68	16.8041	94.8992
-PENN J-4 Spot 42	360.248	57224.2	3.2848	9.42139	0.662944	4.65265	1.11823	0.318056	0.900526	0.805313	1780.23	14.0083	1758.77	9.34592	1733.36	12.1607	1733.36	12.1607	102.704
-PENN J-4 Spot 107	216.458	49776.4	2.92851	9.36935	0.749784	4.61339	1.17718	0.31363	0.907514	0.770921	1758.54	13.9674	1751.69	9.82386	1743.51	13.7365	1743.51	13.7365	100.862
-PENN J-4 Spot 60	203.226	118108	4.16348	9.35858	0.683711	4.51647	1.35689	0.306688	1.17204	0.863772	1724.39	17.7332	1734.01	11.2805	1745.62	12.5225	1745.62	12.5225	98.784
-PENN J-4 Spot 254	99.0348	107261	4.47621	9.345	0.686132	4.57786	1.20888	0.310406	0.9953	0.823322	1742.7	15.1984	1745.25	10.0745	1748.28	12.5627	1748.28	12.5627	99.6811
-PENN J-4 Spot 165	416.295	964007	2.93557	9.34209	0.734624	4.453	1.51312	0.301845	1.32282	0.874235	1700.45	19.7718	1722.26	12.5471	1748.85	13.4498	1748.85	13.4498	97.2328
-PENN J-4 Spot 90	323.681	106772	3.62314	9.26162	0.76311	4.59101	1.38977	0.30852	1.16151	0.835761	1733.42	17.6541	1747.64	11.588	1764.67	13.9457	1764.67	13.9457	98.2289
-PENN J-4 Spot 229	113.738	414109	2.3269	9.17907	0.611345	4.55324	1.25473	0.303255	1.09572	0.873272	1707.43	16.436	1740.75	10.4465	1781.01	11.1478	1781.01	11.1478	95.8684
-PENN J-4 Spot 37	392.194	71133.6	4.48676	9.14785	0.654521	4.83071	1.35875	0.32064	1.19072	0.876332	1792.86	18.6364	1790.26	11.4309	1787.22	11.9261	1787.22	11.9261	100.315
-PENN J-4 Spot 58	239.132	105256	4.78063	9.11775	0.784337	4.91203	1.20394	0.324965	0.91339	0.758669	1813.93	14.4413	1804.32	10.1572	1793.23	14.2814	1793.23	14.2814	101.154
-PENN J-4 Spot 121	452.403	159747	3.92552	9.10962	0.709799	4.78423	1.56007	0.316228	1.38924	0.890501	1771.28	21.5162	1782.13	13.1028	1794.85	12.9232	1794.85	12.9232	98.6867
-PENN J-4 Spot 2	639.329	330826	4.39027	9.09829	0.526372	4.79896	1.46944	0.316807	1.37193	0.93364	1774.12	21.2777	1784.72	12.3481	1797.12	9.58083	1797.12	9.58083	98.7202
-PENN J-4 Spot 31	331.884	104580	2.09726	8.9067	0.608615	5.11944	1.60267	0.330847	1.48261	0.925089	1842.48	23.76	1839.34	13.6148	1835.76	11.0256	1835.76	11.0256	100.366
-PENN J-4 Spot 230	291.214	40830.9	1.97766	8.87992	0.880195	4.40702	1.93013	0.28395	1.71775	0.889965	1611.22	24.4891	1713.66	15.9749	1841.21	15.9332	1841.21	15.9332	87.5089
-PENN J-4 Spot 128	233.642	41014.9	1.56209	8.83079	0.722701	5.15629	1.22933	0.330389	0.994457	0.808945	1840.26	15.9203	1845.43	10.4552	1851.25	13.0659	1851.25	13.0659	99.4065
-PENN J-4 Spot 281	186.641	61543.1	1.1002	8.83013	0.859107	5.12853	1.47986	0.328585	1.20495	0.814236	1831.52	19.2109	1840.84	12.575	1851.39	15.5323	1851.39	15.5323	98.9269
-PENN J-4 Spot 168	79.6909	17647.8	0.987534	8.70962	0.783866	5.15094	1.29086	0.325517	1.02561	0.794517	1816.62	16.2365	1844.55	10.9767	1876.19	14.1313	1876.19	14.1313	96.8246
-PENN J-4 Spot 38	159.961	79172	2.10521	8.6832	0.840978	5.03466	1.36152	0.317203	1.07075	0.786434	1776.06	16.6223	1825.17	11.5343	1881.67	15.149	1881.67	15.149	94.3873
-PENN J-4 Spot 189	221.342	63225.4	2.04491	8.65669	0.636439	5.32474	1.09725	0.334455	0.893819	0.814596	1859.94	14.4412	1872.84	9.38005	1887.17	11.4564	1887.17	11.4564	98.5567
-PENN J-4 Spot 119	320.419	44731.9	3.19145	8.62016	0.780292	5.35434	1.40429	0.334895	1.16755	0.831416	1862.06	18.8823	1877.58	12.0155	1894.78	14.0336	1894.78	14.0336	98.2734
-PENN J-4 Spot 205	210.516	46565.1	1.69818	8.56949	0.697642	5.46513	1.30546	0.339816	1.10342	0.84523	1885.78	18.0408	1895.13	11.2056	1905.38	12.533	1905.38	12.533	98.9716
-PENN J-4 Spot 9	181.154	44554.8	1.86498	8.55257	0.558725	5.42908	1.41611	0.336907	1.30123	0.918875	1871.77	21.1389	1889.46	12.143	1908.93	10.0331	1908.93	10.0331	98.0536
-PENN J-4 Spot 286	1185.33	844.499	6.16934	7.81743	3.63191	1.40021	4.32408	0.0794226	2.34667	0.542697	492.676	11.1307	889.024	25.6188	2068.79	64.0328	2068.79	64.0328	23.8146
-PENN J-4 Spot 27	77.1679	193996	0.698362	7.22055	0.748167	7.29	1.11503	0.381932	0.826762	0.741471	2085.3	14.7298	2147.59	9.95641	2207.69	12.9854	2207.69	12.9854	94.4564
-PENN J-4 Spot 167	167.753	25937.1	1.80987	6.55041	0.788112	8.60408	1.09788	0.408941	0.764346	0.6962	2210.08	14.3013	2296.99	9.9873	2375.21	13.4347	2375.21	13.4347	93.0477
-PENN J-4 Spot 225	285.98	35387.1	3.60611	5.80038	0.600988	10.4382	0.975022	0.439309	0.767778	0.787446	2347.55	15.1067	2474.45	9.03491	2580.36	10.0381	2580.36	10.0381	90.9773
-PENN J-4 Spot 79	24.3981	5376.69	1.35075	5.7538	1.17009	11.2139	1.73926	0.468167	1.28682	0.739868	2475.52	26.4523	2541.08	16.2156	2593.82	19.5158	2593.82	19.5158	95.4389
-PENN J-4 Spot 164	134.545	41635.6	1.67912	5.59294	0.604798	12.3482	1.06762	0.50111	0.879786	0.824066	2618.57	18.9329	2631.25	10.0286	2641.01	10.0399	2641.01	10.0399	99.1502
-PENN J-4 Spot 89	569.266	538252	3.48549	5.48474	0.837895	10.4702	1.45813	0.416675	1.19334	0.818408	2245.37	22.6263	2477.28	13.5156	2673.39	13.8711	2673.39	13.8711	83.9894
-PENN J-4 Spot 73	210.101	51153.6	3.12589	5.34526	0.661279	12.9583	1.23414	0.50258	1.04203	0.844332	2624.88	22.4681	2676.63	11.634	2715.95	10.9037	2715.95	10.9037	96.6469
-PENN J-4 Spot 224	34.3026	28045.4	0.984316	5.32176	0.877876	12.1862	1.58066	0.470555	1.31447	0.831594	2485.99	27.1145	2618.84	14.8337	2723.21	14.4621	2723.21	14.4621	91.2892
-PENN J-4 Spot 86	129.3	19111.3	2.02332	5.23191	0.611991	13.6572	1.27163	0.518454	1.11468	0.876575	2692.62	24.5346	2726.24	12.0316	2751.22	10.0583	2751.22	10.0583	97.87
-PENN J-4 Spot 204	831.633	10215.2	1.69092	5.19018	1.23234	15.0461	5.64346	0.566622	5.50726	0.975867	2893.93	128.422	2818.16	53.7818	2764.38	20.2263	2764.38	20.2263	104.687	* Large error
-PENN J-4 Spot 287	215.894	122340	1.53815	5.17907	0.635399	13.8544	1.16944	0.520627	0.981759	0.839514	2701.84	21.6685	2739.8	11.0753	2767.89	10.4268	2767.89	10.4268	97.6137
-PENN J-4 Spot 186	156.899	148716	1.18761	5.1483	0.561807	13.8439	1.02255	0.517144	0.854391	0.835548	2687.05	18.7742	2739.09	9.68364	2777.67	9.20738	2777.67	9.20738	96.7379
-PENN J-4 Spot 275	114.076	546453	1.23765	5.13569	0.717714	14.4114	1.38962	0.537024	1.18993	0.856297	2770.98	26.8012	2777.18	13.1951	2781.69	11.7594	2781.69	11.7594	99.6151
-PENN J-4 Spot 70	62.7626	21468.3	2.07616	5.01662	0.854335	14.9559	1.26192	0.544393	0.928742	0.735974	2801.81	21.1042	2812.44	12.0109	2820.06	13.9497	2820.06	13.9497	99.3531
-PENN J-4 Spot 44	211.91	1.27113e+06	2.51029	5.00438	0.584269	14.6452	1.25826	0.531782	1.11438	0.885653	2748.96	24.9396	2792.47	11.9601	2824.05	9.53528	2824.05	9.53528	97.3411
-PENN J-4 Spot 258	10.9779	35111.1	24.4991	4.72755	1.2365	15.4247	2.30243	0.529104	1.94223	0.843556	2737.68	43.3241	2841.84	21.9586	2916.56	20.0197	2916.56	20.0197	93.8667
PennJ5							Isotope ratios						Apparent ages (Ma)
Analysis	U	206Pb	U/Th	206Pb*	±	207Pb*	±	206Pb*	±	error	206Pb*	±	207Pb*	±	206Pb*	±	Best age	±	Conc
	(ppm)	204Pb		207Pb*	(%)	235U*	(%)	238U	(%)	corr.	238U*	(Ma)	235U	(Ma)	207Pb*	(Ma)	(Ma)	(Ma)	(%)
-PENN J-5 Spot 34	177.702	23313.4	1.38397	18.6723	1.23663	0.440319	1.68682	0.059656	1.14722	0.680109	373.533	4.16346	370.477	5.23615	351.411	27.9281	373.533	4.16346	NA
-PENN J-5 Spot 220	106.696	11366.3	1.23293	18.3194	1.3364	0.470805	1.59524	0.0625805	0.871103	0.546064	391.3	3.30724	391.745	5.18496	394.348	29.9747	391.3	3.30724	NA
-PENN J-5 Spot 146	297.344	57043.4	1.66682	18.4598	0.948181	0.467435	1.45208	0.062609	1.09977	0.757375	391.473	4.17718	389.416	4.69663	377.194	21.3301	391.473	4.17718	NA
-PENN J-5 Spot 209	223.29	10599.9	0.977851	18.5228	0.932207	0.467959	1.30831	0.062893	0.917961	0.701641	393.195	3.50151	389.778	4.23483	369.529	20.9781	393.195	3.50151	NA
-PENN J-5 Spot 100	272.67	11188	7.84946	18.9543	0.901016	0.459733	1.36211	0.0632267	1.02153	0.749958	395.219	3.916	384.072	4.3559	317.414	20.4638	395.219	3.916	NA
-PENN J-5 Spot 216	321.461	57693.7	2.87425	18.1558	0.956597	0.480219	1.59199	0.0632618	1.27254	0.799338	395.432	4.8808	398.223	5.2443	414.432	21.38	395.432	4.8808	NA
-PENN J-5 Spot 193	124.073	36749.6	2.3039	18.2693	1.27991	0.478406	1.77986	0.0634171	1.23682	0.694898	396.373	4.75476	396.979	5.84823	400.486	28.6758	396.373	4.75476	NA
-PENN J-5 Spot 167	434.054	115181	0.954799	18.1106	0.785359	0.48445	1.7024	0.0636605	1.51042	0.887231	397.849	5.82751	401.122	5.6413	419.997	17.5358	397.849	5.82751	NA
-PENN J-5 Spot 201	200.421	10463.6	1.89625	18.7833	0.868701	0.46769	1.32937	0.063741	1.00627	0.756952	398.336	3.887	389.592	4.30132	337.975	19.6784	398.336	3.887	NA
-PENN J-5 Spot 151	381.656	87435.4	2.4315	18.0141	0.997532	0.491507	1.99789	0.0642436	1.73104	0.866434	401.382	6.7362	405.937	6.68517	431.916	22.2385	401.382	6.7362	92.9305
-PENN J-5 Spot 103	186.595	50368.5	1.81437	18.14	0.984009	0.491473	1.39609	0.0646882	0.990352	0.709375	404.074	3.87891	405.914	4.67123	416.375	21.9854	404.074	3.87891	97.0457
-PENN J-5 Spot 91	97.5017	69284.4	1.81974	18.0038	1.33845	0.498701	1.66065	0.0651465	0.983013	0.591944	406.849	3.87578	410.822	5.61097	433.192	29.8393	406.849	3.87578	93.9188
-PENN J-5 Spot 115	125.306	20209.6	2.71912	18.3001	0.927412	0.499926	1.53273	0.0663813	1.22032	0.796172	414.317	4.89695	411.652	5.18724	396.715	20.7923	414.317	4.89695	104.437
-PENN J-5 Spot 258	118.996	6006	1.76626	19.1941	1.42938	0.47698	1.97049	0.0664285	1.35636	0.688336	414.603	5.44648	395.999	6.46153	288.783	32.6848	414.603	5.44648	143.569
-PENN J-5 Spot 39	308.566	65763.1	1.29707	18.0938	0.822804	0.507957	1.26837	0.0666876	0.965278	0.761037	416.169	3.89026	417.074	4.33828	422.064	18.3644	416.169	3.89026	98.6032
-PENN J-5 Spot 35	102.084	10707.7	2.22558	18.3494	1.117	0.503351	1.69136	0.0670165	1.27005	0.750903	418.156	5.1422	413.968	5.75018	390.67	25.0692	418.156	5.1422	107.035
-PENN J-5 Spot 195	431.808	26925.6	4.37271	16.9871	1.3293	0.547338	1.91999	0.0674625	1.3854	0.721566	420.85	5.64423	443.252	6.89616	561.258	28.984	420.85	5.64423	74.9834
-PENN J-5 Spot 143	260.283	68061.1	1.46529	17.9583	0.955368	0.520708	1.47425	0.0678495	1.12281	0.76161	423.187	4.59896	425.624	5.12571	438.824	21.2619	423.187	4.59896	96.4366
-PENN J-5 Spot 57	105.476	27115.7	0.689757	17.8416	1.25904	0.524401	1.6272	0.0678868	1.03083	0.633496	423.411	4.22439	428.087	5.68382	453.356	27.9712	423.411	4.22439	93.3949
-PENN J-5 Spot 41	127.904	45015.2	1.19873	18.1532	1.03458	0.520471	1.54914	0.0685548	1.15303	0.744305	427.443	4.7687	425.466	5.38446	414.744	23.1212	427.443	4.7687	103.062
-PENN J-5 Spot 33	231.725	44202.1	1.38047	17.9095	0.981532	0.528436	1.40876	0.0686695	1.01054	0.717328	428.135	4.18594	430.771	4.94555	444.874	21.833	428.135	4.18594	96.2373
-PENN J-5 Spot 230	395.74	53098.6	1.87659	18.0514	0.790151	0.52882	1.50398	0.069264	1.2797	0.850873	431.72	5.34378	431.026	5.28237	427.3	17.6202	431.72	5.34378	101.034
-PENN J-5 Spot 189	61.8183	5975.4	1.5586	18.6614	2.82322	0.512341	3.03426	0.069373	1.11182	0.366422	432.377	4.64958	420.022	10.4378	352.754	63.7864	432.377	4.64958	122.572
-PENN J-5 Spot 161	441.269	31346.9	1.25024	18.2752	0.855461	0.524554	1.64902	0.0695569	1.40978	0.854915	433.486	5.91024	428.189	5.76115	399.76	19.1682	433.486	5.91024	108.437
-PENN J-5 Spot 72	99.1712	1.27561e+06	1.41473	17.9805	1.27731	0.534648	1.71679	0.0697522	1.1471	0.668167	434.663	4.82164	434.89	6.07311	436.07	28.4412	434.663	4.82164	99.6772
-PENN J-5 Spot 219	907.668	11091	2.29708	14.0804	1.9085	0.690605	2.7083	0.0705557	1.92159	0.709521	439.503	8.164	533.164	11.2339	957.102	38.998	439.503	8.164	45.9201
-PENN J-5 Spot 117	95.8741	14683	1.85748	18.4475	1.31875	0.527507	1.70332	0.0706079	1.07804	0.632908	439.817	4.58329	430.154	5.97277	378.698	29.6467	439.817	4.58329	116.139
-PENN J-5 Spot 251	413.846	122623	1.26112	18.098	0.866145	0.541692	1.78793	0.0711331	1.56413	0.874825	442.979	6.69605	439.54	6.37884	421.546	19.3341	442.979	6.69605	105.084
-PENN J-5 Spot 148	476.128	203024	2.04123	17.7471	0.820056	0.556157	2.08551	0.0716164	1.91751	0.919446	445.886	8.26094	449.022	7.56823	465.099	18.1887	445.886	8.26094	95.8691
-PENN J-5 Spot 45	193.812	46330.3	8.77184	17.8618	1.04613	0.552711	1.57271	0.0716327	1.17432	0.746686	445.985	5.06024	446.771	5.68449	450.803	23.2357	445.985	5.06024	98.9313
-PENN J-5 Spot 284	736.701	49416.3	1.27893	17.2633	1.04654	0.574274	1.72246	0.0719335	1.36807	0.794254	447.794	5.91822	460.775	6.38005	526.042	22.9306	447.794	5.91822	85.1252
-PENN J-5 Spot 17	308.976	24967.5	1.49092	17.2713	1.04662	0.574883	1.73842	0.072043	1.38806	0.798459	448.453	6.0132	461.168	6.4435	524.988	22.963	448.453	6.0132	85.4215
-PENN J-5 Spot 293	38.8954	4134.32	0.679973	19.2936	1.76007	0.514809	2.09386	0.072069	1.1342	0.541681	448.608	4.91513	421.678	7.22559	276.967	40.2988	448.608	4.91513	161.972
-PENN J-5 Spot 95	360.252	59380.4	0.437449	17.6914	0.857803	0.568452	1.46371	0.0729697	1.186	0.810275	454.022	5.19948	457.013	5.38654	472.057	18.9812	454.022	5.19948	96.1797
-PENN J-5 Spot 218	954.418	203689	6.37486	17.8959	0.814483	0.563036	1.77487	0.0731103	1.57695	0.88849	454.867	6.92583	453.5	6.49187	446.559	18.1233	454.867	6.92583	101.86
-PENN J-5 Spot 64	138.96	34652	1.83809	17.6949	1.11994	0.578393	1.49293	0.0742607	0.9872	0.661252	461.774	4.39919	463.428	5.55495	471.63	24.8032	461.774	4.39919	97.9102
-PENN J-5 Spot 210	119.943	17084.3	1.7784	17.9321	0.969246	0.57167	1.53612	0.0743812	1.19174	0.775808	462.497	5.31868	459.094	5.67341	442.074	21.5707	462.497	5.31868	104.62
-PENN J-5 Spot 182	173.214	39053.4	1.15745	17.7606	1.05534	0.577568	1.42216	0.0744302	0.9533	0.670321	462.791	4.25715	462.897	5.28683	463.427	23.3873	462.791	4.25715	99.8627
-PENN J-5 Spot 231	300.855	49041.4	4.08569	17.4619	0.819936	0.588542	1.2886	0.0745687	0.99408	0.771442	463.622	4.44695	469.936	4.84764	500.91	18.0319	463.622	4.44695	92.5561
-PENN J-5 Spot 214	268.801	24711.8	1.83021	17.7016	0.970296	0.584961	1.53656	0.0751325	1.19145	0.775398	467.003	5.36734	467.644	5.75828	470.808	21.4791	467.003	5.36734	99.1919
-PENN J-5 Spot 0	1051.97	34312.7	1.65593	16.8408	0.840003	0.615088	1.39985	0.0751601	1.11981	0.799951	467.169	5.04637	486.764	5.41324	580.112	18.2681	467.169	5.04637	80.5309
-PENN J-5 Spot 185	703.204	68647.4	1.80745	17.772	0.73863	0.58292	1.55316	0.0751682	1.36628	0.87968	467.217	6.15768	466.336	5.80766	462.021	16.3726	467.217	6.15768	101.125
-PENN J-5 Spot 2	230.653	37459.8	1.37216	17.9275	1.12468	0.578787	1.54196	0.0752881	1.05486	0.684103	467.936	4.76117	463.681	5.73987	442.64	25.0133	467.936	4.76117	105.715
-PENN J-5 Spot 217	125.399	45811.3	2.026	17.5643	1.20094	0.597533	1.713	0.0761518	1.22152	0.713088	473.112	5.57218	475.667	6.50587	488.002	26.502	473.112	5.57218	96.9487
-PENN J-5 Spot 165	323.687	83197.3	2.0442	16.9215	1.00496	0.640555	1.63316	0.0786472	1.28734	0.788256	488.043	6.05085	502.65	6.47484	569.722	21.8488	488.043	6.05085	85.6634
-PENN J-5 Spot 233	427.199	172090	5.20265	17.1598	0.921425	0.645868	1.98513	0.0804161	1.75833	0.88575	498.606	8.43666	505.933	7.91	539.215	20.1662	498.606	8.43666	92.4688
-PENN J-5 Spot 109	236.359	59746.3	2.30005	17.4573	0.944126	0.638784	1.47991	0.0809132	1.13963	0.770067	501.571	5.49932	501.553	5.85735	501.468	20.7857	501.571	5.49932	100.02
-PENN J-5 Spot 181	411.46	55957.6	1.26168	16.8885	0.70554	0.69533	1.51624	0.0852057	1.34209	0.885141	527.121	6.7929	535.998	6.31451	573.976	15.3461	527.121	6.7929	91.8368
-PENN J-5 Spot 83	79.7543	10701.8	1.35881	17.4742	1.44672	0.677692	1.82441	0.0859247	1.11151	0.609246	531.39	5.66959	525.379	7.48307	499.36	31.8669	531.39	5.66959	106.414
-PENN J-5 Spot 106	394.945	70271.8	2.38206	17.0784	0.883467	0.714313	1.70784	0.0885161	1.46158	0.855804	546.755	7.66176	547.304	7.22576	549.585	19.2908	546.755	7.66176	99.4851
-PENN J-5 Spot 8	322.244	57347	2.22428	15.6179	1.73963	0.806547	2.00229	0.0913987	0.991393	0.495129	563.804	5.35205	600.515	9.07715	741.652	36.7976	563.804	5.35205	76.02
-PENN J-5 Spot 286	109.995	6115.78	1.45015	12.3415	4.05774	1.02982	4.5583	0.0922176	2.07673	0.455593	568.639	11.3032	718.836	23.4862	1221.24	79.7616	568.639	11.3032	46.5624
-PENN J-5 Spot 278	170.106	7295.4	2.68125	14.3253	3.7921	0.92923	3.94534	0.0965861	1.08891	0.275999	594.371	6.18276	667.23	19.2977	921.795	77.9562	594.371	6.18276	64.4797
-PENN J-5 Spot 239	99.0631	17626.7	0.581146	16.5032	0.966597	0.814045	1.40998	0.0974774	1.02652	0.728036	599.608	5.8775	604.721	6.42465	623.907	20.8649	599.608	5.8775	96.1054
-PENN J-5 Spot 150	153.525	65152.3	1.31778	16.0045	1.00315	0.85606	1.43665	0.0994111	1.02843	0.71585	610.957	5.99468	627.97	6.72821	689.739	21.4047	610.957	5.99468	88.5779
-PENN J-5 Spot 126	212.966	45514.1	2.15603	16.5775	0.752792	0.840307	1.22238	0.101075	0.963078	0.787871	620.708	5.69913	619.315	5.66746	614.206	16.2801	620.708	5.69913	101.059
-PENN J-5 Spot 116	799.403	168418	2.92663	16.7607	0.689928	0.843348	1.77155	0.102562	1.63169	0.921049	629.408	9.78454	620.991	8.22988	590.43	14.9612	629.408	9.78454	106.602
-PENN J-5 Spot 155	316.4	23544.8	0.777426	16.4994	0.800447	0.884024	1.52595	0.105833	1.29915	0.851375	648.5	8.0151	643.154	7.27033	624.402	17.2806	648.5	8.0151	103.859
-PENN J-5 Spot 297	377.603	45241.6	1.18304	16.5028	0.831576	0.894365	1.21815	0.107093	0.890149	0.73074	655.843	5.55083	648.712	5.83964	623.951	17.9532	655.843	5.55083	105.111
-PENN J-5 Spot 204	242.013	119706	0.983431	15.8436	0.912674	0.961425	1.31847	0.110524	0.95152	0.721685	675.791	6.10471	684.034	6.56221	711.251	19.42	675.791	6.10471	95.0144
-PENN J-5 Spot 114	111.625	15553.9	2.62638	15.8739	1.03575	1.0371	1.62162	0.119451	1.24775	0.769445	727.404	8.58284	722.472	8.38297	707.181	22.0304	727.404	8.58284	102.86
-PENN J-5 Spot 257	15.3075	2770.97	1.90855	14.4539	3.45654	1.48366	3.79997	0.1556	1.57863	0.415432	932.278	13.7025	923.73	23.053	903.355	71.2553	903.355	71.2553	103.202
-PENN J-5 Spot 128	132.058	30060.1	2.71827	14.4517	0.964577	1.48201	1.58203	0.155403	1.25396	0.792626	931.177	10.8724	923.053	9.59192	903.674	19.8963	903.674	19.8963	103.043
-PENN J-5 Spot 173	179.608	70446.9	3.27407	14.4081	0.819734	1.45628	1.34691	0.152244	1.06874	0.793475	913.531	9.10305	912.473	8.10859	909.895	16.8798	909.895	16.8798	100.4
-PENN J-5 Spot 198	156.46	21393.3	3.72481	14.3349	0.846267	1.4754	1.36348	0.153458	1.06907	0.784075	920.321	9.16882	920.345	8.25188	920.422	17.3981	920.422	17.3981	99.989
-PENN J-5 Spot 288	25.9981	8753.16	1.11017	14.2024	1.60252	1.55964	2.11038	0.160721	1.37318	0.650681	960.783	12.2572	954.324	13.0575	939.479	32.8612	939.479	32.8612	102.268
-PENN J-5 Spot 156	200.597	30469.6	1.56258	14.1152	0.803103	1.60466	1.28836	0.164346	1.00742	0.781942	980.886	9.16662	972.03	8.05953	952.045	16.4502	952.045	16.4502	103.029
-PENN J-5 Spot 110	323.161	93291.7	8.76536	14.1065	0.79892	1.56091	1.33825	0.159766	1.07362	0.802251	955.478	9.53416	954.829	8.28251	953.312	16.3421	953.312	16.3421	100.227
-PENN J-5 Spot 93	245.392	58499.4	2.64527	14.1033	0.738868	1.54681	1.35154	0.158287	1.1317	0.837339	947.252	9.96963	949.221	8.33508	953.772	15.0984	953.772	15.0984	99.3163
-PENN J-5 Spot 268	47.229	63563.7	1.98188	14.0358	1.17109	1.61216	1.52018	0.164185	0.969273	0.637604	979.989	8.81201	974.948	9.52677	963.626	23.8967	963.626	23.8967	101.698
-PENN J-5 Spot 132	494.346	155586	2.61607	14.0261	0.736783	1.37522	1.67292	0.139958	1.50194	0.897793	844.422	11.8872	878.399	9.8353	965.017	15.0424	965.017	15.0424	87.5034
-PENN J-5 Spot 96	37.646	23433.6	2.40039	13.9538	1.16578	1.6728	1.59361	0.169365	1.08652	0.6818	1008.61	10.1445	998.252	10.1275	975.583	23.7458	975.583	23.7458	103.386
-PENN J-5 Spot 135	48.5602	34748.4	1.39453	13.9536	1.1065	1.58765	1.72513	0.160742	1.32353	0.767205	960.898	11.8153	965.376	10.7477	975.607	22.5558	975.607	22.5558	98.4924
-PENN J-5 Spot 303	268.955	65026	2.4672	13.9243	0.753336	1.56455	1.21208	0.15807	0.949544	0.783397	946.043	8.35503	956.271	7.50843	979.893	15.3326	979.893	15.3326	96.5455
-PENN J-5 Spot 71	141.55	23469.3	1.00428	13.8931	0.800647	1.66297	1.29607	0.167638	1.01919	0.786373	999.086	9.43276	994.51	8.21835	984.412	16.2863	984.412	16.2863	101.491
-PENN J-5 Spot 153	114.235	58225.1	1.85505	13.8751	1.00549	1.59433	1.68101	0.16051	1.34713	0.801386	959.613	12.0111	967.994	10.4898	987.071	20.4586	987.071	20.4586	97.2183
-PENN J-5 Spot 46	124.46	16996.2	3.70024	13.8653	0.789603	1.70034	1.43377	0.171063	1.19675	0.834691	1017.96	11.2693	1008.66	9.16723	988.526	16.053	988.526	16.053	102.978
-PENN J-5 Spot 125	136.618	18567.4	2.38546	13.818	0.834374	1.71333	1.24007	0.17178	0.917385	0.739785	1021.91	8.66955	1013.53	7.95103	995.449	16.9571	995.449	16.9571	102.658
-PENN J-5 Spot 23	195.662	25080.6	3.71054	13.8091	0.870396	1.66327	1.34584	0.166654	1.02649	0.762716	993.65	9.45252	994.622	8.53452	996.746	17.6653	996.746	17.6653	99.6895
-PENN J-5 Spot 190	151.024	3.94948e+06	2.3543	13.764	0.857234	1.70083	1.25574	0.169861	0.917624	0.730744	1011.35	8.58902	1008.84	8.02976	1003.39	17.3808	1003.39	17.3808	100.793
-PENN J-5 Spot 86	98.0764	12727.6	2.10625	13.7424	0.869432	1.75702	1.35776	0.175198	1.04288	0.768088	1040.68	10.0223	1029.75	8.78616	1006.57	17.6194	1006.57	17.6194	103.389
-PENN J-5 Spot 298	180.646	38847	4.16061	13.7337	0.864507	1.59077	1.487	0.15852	1.20988	0.813635	948.548	10.6719	966.601	9.27113	1007.86	17.5365	1007.86	17.5365	94.1148
-PENN J-5 Spot 12	103.967	54907.4	3.83785	13.7208	0.82686	1.66551	1.2537	0.165811	0.942368	0.751672	988.99	8.64021	995.476	7.95423	1009.77	16.751	1009.77	16.751	97.9417
-PENN J-5 Spot 63	116.158	15266.3	1.8904	13.7179	1.08069	1.70254	1.4697	0.169462	0.996055	0.677726	1009.15	9.30441	1009.49	9.4015	1010.2	21.8942	1010.2	21.8942	99.8956
-PENN J-5 Spot 55	139.265	28493.2	1.73448	13.7142	0.980694	1.70996	1.32304	0.170155	0.888067	0.671235	1012.96	8.32462	1012.27	8.47686	1010.76	19.8672	1010.76	19.8672	100.218
-PENN J-5 Spot 304	127.791	20433.6	1.71798	13.7006	0.73699	1.7464	1.32903	0.173608	1.10597	0.832163	1031.96	10.5465	1025.83	8.58136	1012.76	14.9384	1012.76	14.9384	101.896
-PENN J-5 Spot 137	64.9082	16979	1.47238	13.6951	0.99811	1.68279	1.44601	0.167218	1.04629	0.72357	996.765	9.66277	1002.04	9.20994	1013.58	20.2271	1013.58	20.2271	98.3412
-PENN J-5 Spot 158	43.5844	26550.6	2.42041	13.6928	0.987974	1.6726	1.47717	0.166178	1.09815	0.743415	991.02	10.0876	998.175	9.38707	1013.91	20.0144	1013.91	20.0144	97.7427
-PENN J-5 Spot 127	320.142	67682.2	3.62964	13.6808	0.91478	1.7278	1.55405	0.171512	1.25629	0.808394	1020.44	11.8564	1018.93	9.99518	1015.69	18.5336	1015.69	18.5336	100.467
-PENN J-5 Spot 261	255.265	64593.9	2.10863	13.6786	0.817752	1.65863	1.86676	0.164619	1.67812	0.898946	982.395	15.291	992.854	11.8258	1016.02	16.567	1016.02	16.567	96.6907
-PENN J-5 Spot 30	180.421	512337	4.11023	13.6759	0.875138	1.76839	1.52273	0.175477	1.24613	0.818353	1042.22	11.9919	1033.93	9.87682	1016.41	17.7288	1016.41	17.7288	102.539
-PENN J-5 Spot 90	97.4628	27257.1	1.38332	13.6526	0.958767	1.63933	1.6026	0.162394	1.28418	0.801305	970.066	11.5654	985.455	10.1075	1019.87	19.4121	1019.87	19.4121	95.1164
-PENN J-5 Spot 159	352.202	100960	3.13515	13.6434	0.812386	1.78766	1.47129	0.176968	1.22667	0.833738	1050.39	11.8898	1040.97	9.58044	1021.24	16.4457	1021.24	16.4457	102.855
-PENN J-5 Spot 309	21.5149	6815.12	2.08695	13.643	2.08663	1.80699	2.36868	0.178877	1.121	0.47326	1060.84	10.9651	1047.99	15.4841	1021.29	42.2431	1021.29	42.2431	103.872
-PENN J-5 Spot 184	355.124	101460	1.55987	13.6271	0.712395	1.69715	1.64295	0.167808	1.48047	0.901102	1000.02	13.7138	1007.46	10.4975	1023.66	14.4161	1023.66	14.4161	97.6912
-PENN J-5 Spot 249	103.824	53269.7	2.81537	13.6233	0.86782	1.80851	1.24545	0.178769	0.893331	0.717274	1060.24	8.7336	1048.54	8.1435	1024.21	17.5586	1024.21	17.5586	103.518
-PENN J-5 Spot 274	233.054	179446	2.00887	13.6151	0.800227	1.75331	1.22305	0.173207	0.924929	0.756246	1029.76	8.80276	1028.38	7.90838	1025.44	16.1885	1025.44	16.1885	100.421
-PENN J-5 Spot 240	61.3653	189436	1.9584	13.5945	1.01259	1.70302	1.42002	0.167986	0.995546	0.701079	1001	9.23027	1009.67	9.08461	1028.49	20.4949	1028.49	20.4949	97.3271
-PENN J-5 Spot 22	372.508	753271	3.16393	13.5944	0.911391	1.71383	1.38128	0.169051	1.03794	0.751428	1006.88	9.67548	1013.72	8.85746	1028.51	18.4482	1028.51	18.4482	97.8969
-PENN J-5 Spot 225	232.609	488756	2.52932	13.5821	0.910211	1.78443	1.49775	0.175855	1.18944	0.794152	1044.29	11.4673	1039.8	9.74643	1030.35	18.4195	1030.35	18.4195	101.353
-PENN J-5 Spot 215	121.378	584858	2.28053	13.5818	0.89094	1.73963	1.41294	0.171436	1.09665	0.776144	1020.02	10.3459	1023.33	9.11028	1030.39	18.0289	1030.39	18.0289	98.9927
-PENN J-5 Spot 73	48.6053	59114.3	2.48957	13.5791	1.12621	1.78399	1.75308	0.175772	1.34348	0.766354	1043.83	12.9472	1039.63	11.4071	1030.8	22.785	1030.8	22.785	101.265
-PENN J-5 Spot 267	180.89	305176	3.79626	13.5776	0.690444	1.72463	0.983456	0.169906	0.700337	0.712119	1011.59	6.55668	1017.75	6.3209	1031.01	13.9755	1031.01	13.9755	98.117
-PENN J-5 Spot 141	198.856	206465	1.79857	13.5573	0.90178	1.76792	1.48405	0.17391	1.17864	0.794206	1033.62	11.2561	1033.76	9.62497	1034.03	18.238	1034.03	18.238	99.9601
-PENN J-5 Spot 48	77.5425	75340.7	2.53377	13.5519	1.18002	1.67504	1.64635	0.164708	1.14805	0.697333	982.886	10.4659	999.102	10.468	1034.84	23.8571	1034.84	23.8571	94.9793
-PENN J-5 Spot 65	56.9464	73591.6	2.28999	13.5514	0.936619	1.6623	1.46323	0.163448	1.12419	0.76829	975.909	10.181	994.252	9.277	1034.92	18.9399	1034.92	18.9399	94.298
-PENN J-5 Spot 66	549.621	202581	3.60447	13.5397	0.762464	1.7746	1.51093	0.17434	1.30444	0.863335	1035.98	12.4838	1036.21	9.81271	1036.67	15.4167	1036.67	15.4167	99.9337
-PENN J-5 Spot 112	224.585	60244.1	1.47245	13.5217	0.885892	1.83222	1.21433	0.179762	0.830541	0.683949	1065.67	8.15798	1057.07	7.97676	1039.34	17.9033	1039.34	17.9033	102.534
-PENN J-5 Spot 281	170.526	36149.4	1.20992	13.5216	0.851122	1.8501	1.43589	0.181514	1.15645	0.805388	1075.24	11.4529	1063.47	9.46453	1039.36	17.2007	1039.36	17.2007	103.452
-PENN J-5 Spot 101	70.3855	91389.1	4.18275	13.4943	1.01895	1.7438	1.57982	0.17074	1.20731	0.764204	1016.19	11.3504	1024.87	10.1952	1043.48	20.5773	1043.48	20.5773	97.3849
-PENN J-5 Spot 232	130.798	73516.9	1.57157	13.4851	0.898707	1.68716	1.55873	0.165082	1.27357	0.817053	984.956	11.6328	1003.69	9.93753	1044.85	18.1471	1044.85	18.1471	94.2673
-PENN J-5 Spot 160	149.728	26151.4	2.56221	13.472	0.928572	1.87476	1.4291	0.183259	1.08631	0.760138	1084.76	10.8457	1072.21	9.46343	1046.82	18.7444	1046.82	18.7444	103.624
-PENN J-5 Spot 252	120.447	36144.5	3.79528	13.4687	0.772734	1.7062	1.2589	0.166741	0.993839	0.789449	994.131	9.15594	1010.86	8.05937	1047.31	15.6002	1047.31	15.6002	94.922
-PENN J-5 Spot 229	574.248	87659.3	3.48558	13.4642	0.899983	1.82651	1.72947	0.178439	1.47685	0.853933	1058.44	14.4158	1055.03	11.3483	1047.98	18.1633	1047.98	18.1633	100.999
-PENN J-5 Spot 291	111.581	2.16852e+06	2.68302	13.4491	0.773135	1.74337	1.46529	0.170126	1.24473	0.849473	1012.8	11.6662	1024.71	9.45522	1050.24	15.6017	1050.24	15.6017	96.4351
-PENN J-5 Spot 307	283.993	65871.3	0.603568	13.4199	0.694547	1.75855	1.14098	0.171235	0.905233	0.79338	1018.91	8.53154	1030.32	7.38568	1054.62	14.0085	1054.62	14.0085	96.6139
-PENN J-5 Spot 191	82.2402	16942	111.313	13.4194	0.986519	1.75213	1.50722	0.170603	1.13951	0.756035	1015.43	10.7057	1027.95	9.74352	1054.7	19.8889	1054.7	19.8889	96.277
-PENN J-5 Spot 244	388.731	77752.7	2.43159	13.4173	0.723535	1.83447	1.28135	0.178593	1.05752	0.825319	1059.28	10.3302	1057.88	8.42067	1055.01	14.5911	1055.01	14.5911	100.405
-PENN J-5 Spot 1	78.7861	63068.3	1.8522	13.4081	0.754876	1.79377	1.41551	0.17451	1.19743	0.845933	1036.91	11.4692	1043.2	9.2285	1056.4	15.2197	1056.4	15.2197	98.1551
-PENN J-5 Spot 79	642.855	237117	1.95503	13.4076	0.841902	1.86317	1.84895	0.181255	1.64616	0.890318	1073.83	16.2831	1068.11	12.2175	1056.47	16.9717	1056.47	16.9717	101.643
-PENN J-5 Spot 56	192.03	1.53899e+06	2.27792	13.4029	0.926667	1.83869	1.83398	0.178811	1.58265	0.862958	1060.48	15.4758	1059.39	12.0625	1057.18	18.6679	1057.18	18.6679	100.312
-PENN J-5 Spot 21	245.068	398836	2.98914	13.4028	0.873911	1.79085	1.29312	0.174157	0.953119	0.73707	1034.98	9.11341	1042.13	8.42559	1057.19	17.6147	1057.19	17.6147	97.8988
-PENN J-5 Spot 253	269.324	85627.7	1.95071	13.3881	0.866413	1.88793	1.54007	0.183397	1.27324	0.826742	1085.51	12.7201	1076.86	10.2231	1059.4	17.4453	1059.4	17.4453	102.464
-PENN J-5 Spot 245	60.3708	150371	1.92028	13.3682	0.920622	1.83827	1.28448	0.178308	0.895734	0.697352	1057.73	8.73797	1059.24	8.44739	1062.39	18.5021	1062.39	18.5021	99.5613
-PENN J-5 Spot 31	161.953	32216.8	1.69682	13.3648	0.86257	1.87926	1.61702	0.182237	1.36774	0.845842	1079.18	13.5911	1073.8	10.7168	1062.91	17.3431	1062.91	17.3431	101.531
-PENN J-5 Spot 277	80.9911	224516	2.08664	13.3051	0.819918	1.84994	1.4379	0.178593	1.18122	0.821491	1059.28	11.5385	1063.41	9.47745	1071.9	16.4523	1071.9	16.4523	98.8233
-PENN J-5 Spot 243	43.9652	29735.6	0.858839	13.3017	1.11443	1.83592	1.76852	0.177194	1.37321	0.776475	1051.63	13.3247	1058.4	11.6257	1072.42	22.3786	1072.42	22.3786	98.0611
-PENN J-5 Spot 80	51.7121	26432.5	2.13156	13.3016	1.24207	1.87786	1.71239	0.181241	1.17879	0.68839	1073.75	11.6594	1073.31	11.3461	1072.43	24.9426	1072.43	24.9426	100.124
-PENN J-5 Spot 50	43.3013	31079.8	1.44189	13.273	1.13016	1.83705	1.69094	0.176921	1.25778	0.743836	1050.13	12.1887	1058.81	11.1181	1076.73	22.6887	1076.73	22.6887	97.5295
-PENN J-5 Spot 202	58.3	31344.5	1.37726	13.2638	1.2463	1.77463	1.675	0.170791	1.11909	0.668114	1016.47	10.5237	1036.22	10.8784	1078.15	25.014	1078.15	25.014	94.279
-PENN J-5 Spot 170	192.172	48334.1	2.56415	13.2603	0.871609	1.87191	1.38714	0.180106	1.0791	0.777931	1067.55	10.6166	1071.21	9.18071	1078.65	17.492	1078.65	17.492	98.9712
-PENN J-5 Spot 222	256.424	178656	1.92421	13.2513	0.800338	1.84524	1.36703	0.177419	1.10826	0.810704	1052.86	10.7654	1061.73	9.00231	1080.01	16.0582	1080.01	16.0582	97.4861
-PENN J-5 Spot 271	146.878	112933	3.24323	13.2381	1.01824	1.91102	1.37129	0.183561	0.918494	0.669802	1086.4	9.18299	1084.94	9.14095	1082.03	20.4066	1082.03	20.4066	100.403
-PENN J-5 Spot 19	35.913	32988.6	1.68835	13.2234	1.51801	1.91439	1.84768	0.183679	1.05335	0.570096	1087.04	10.5371	1086.11	12.3242	1084.24	30.4408	1084.24	30.4408	100.258
-PENN J-5 Spot 75	65.9083	30049.5	3.00519	13.2223	1.04836	1.86112	1.668	0.178554	1.29737	0.7778	1059.07	12.6707	1067.39	11.0174	1084.42	21.0031	1084.42	21.0031	97.6627
-PENN J-5 Spot 197	36.1226	35214.1	1.23706	13.2141	1.07205	1.85651	1.58325	0.178001	1.16508	0.735875	1056.05	11.3488	1065.75	10.4486	1085.68	21.4733	1085.68	21.4733	97.271
-PENN J-5 Spot 122	116.554	128906	3.08456	13.2037	0.846896	1.97806	1.58781	0.189505	1.34309	0.845879	1118.69	13.7937	1108.06	10.709	1087.23	16.9558	1087.23	16.9558	102.894
-PENN J-5 Spot 247	292.02	77295.5	7.49682	13.1729	0.651977	2.01344	1.10043	0.192446	0.886488	0.805587	1134.61	9.22276	1120.05	7.46576	1091.93	13.0603	1091.93	13.0603	103.908
-PENN J-5 Spot 213	43.8578	26072.1	4.11221	13.1688	1.32613	1.92637	1.96798	0.184066	1.45407	0.738865	1089.15	14.5714	1090.28	13.1548	1092.56	26.5603	1092.56	26.5603	99.6882
-PENN J-5 Spot 142	90.2761	31080.3	2.76604	13.1586	1.10891	1.90537	1.67589	0.181918	1.25655	0.749781	1077.44	12.4677	1082.97	11.1602	1094.08	22.2033	1094.08	22.2033	98.4796
-PENN J-5 Spot 276	56.5876	10031.5	1.23082	13.1527	1.03452	1.97374	1.55077	0.188361	1.15527	0.744967	1112.49	11.8045	1106.59	10.4515	1095	20.7112	1095	20.7112	101.597
-PENN J-5 Spot 175	201.832	18367.9	6.19876	13.1515	0.815878	1.9562	1.25375	0.186671	0.951962	0.759292	1103.32	9.6535	1100.58	8.42422	1095.17	16.3201	1095.17	16.3201	100.744
-PENN J-5 Spot 280	53.0433	7084.7	3.04538	13.0789	1.05869	2.03503	1.8582	0.193121	1.52712	0.821825	1138.26	15.9344	1127.3	12.6518	1106.23	21.1677	1106.23	21.1677	102.895
-PENN J-5 Spot 266	42.8827	19791.3	1.3658	13.0689	0.887348	1.98701	1.48393	0.18842	1.1894	0.801518	1112.81	12.1563	1111.11	10.0236	1107.76	17.7505	1107.76	17.7505	100.456
-PENN J-5 Spot 223	80.4895	21180.6	1.63039	13.0458	1.04172	1.95036	1.49797	0.184618	1.07645	0.718605	1092.15	10.8146	1098.57	10.0551	1111.29	20.8044	1111.29	20.8044	98.2784
-PENN J-5 Spot 294	194.549	28279.9	2.58087	13.0379	0.853229	2.02574	1.20267	0.191638	0.847592	0.704759	1130.24	8.78703	1124.19	8.17594	1112.49	17.0361	1112.49	17.0361	101.595
-PENN J-5 Spot 263	265.701	53773.3	7.05619	13.0116	0.837479	1.96599	1.48723	0.185609	1.22901	0.826379	1097.54	12.4032	1103.93	10.01	1116.57	16.6941	1116.57	16.6941	98.2958
-PENN J-5 Spot 306	29.9084	10672.1	2.48816	13	1.18979	1.96465	1.85192	0.185318	1.41916	0.766317	1095.96	14.3032	1103.48	12.462	1118.34	23.7262	1118.34	23.7262	97.999
-PENN J-5 Spot 119	62.5042	70881.2	1.26464	12.978	1.08397	1.97875	1.62718	0.186332	1.21355	0.745802	1101.48	12.2874	1108.3	10.9759	1121.68	21.6157	1121.68	21.6157	98.1984
-PENN J-5 Spot 172	250.245	51724.2	1.39662	12.9698	0.950122	2.02728	1.43977	0.190781	1.08176	0.751342	1125.6	11.1725	1124.71	9.79033	1122.98	18.9275	1122.98	18.9275	100.233
-PENN J-5 Spot 152	98.2117	98221.6	1.72733	12.9614	1.05153	2.03878	1.70658	0.19174	1.34413	0.787616	1130.79	13.9409	1128.55	11.6264	1124.23	20.969	1124.23	20.969	100.583
-PENN J-5 Spot 269	203.003	54808.2	2.65256	12.9338	0.826283	2.00901	1.41537	0.188538	1.14915	0.811903	1113.45	11.7511	1118.56	9.5956	1128.48	16.469	1128.48	16.469	98.6678
-PENN J-5 Spot 124	252.637	62693.7	5.03399	12.9329	0.903471	1.96497	1.7478	0.18439	1.49618	0.856035	1090.92	15.0157	1103.58	11.7619	1128.66	18.0162	1128.66	18.0162	96.6555
-PENN J-5 Spot 149	75.8778	36717.1	2.65292	12.9256	0.90042	1.99296	1.49308	0.186912	1.19102	0.797693	1104.63	12.0908	1113.13	10.0954	1129.78	17.9334	1129.78	17.9334	97.7736
-PENN J-5 Spot 164	111.808	42424.8	2.08501	12.9224	0.889724	2.08052	1.31184	0.195076	0.964008	0.734853	1148.81	10.144	1142.41	8.99642	1130.24	17.7346	1130.24	17.7346	101.643
-PENN J-5 Spot 37	28.4615	75063.1	3.15983	12.915	1.32022	1.95771	2.08344	0.183456	1.61175	0.7736	1085.83	16.1063	1101.1	14.0033	1131.38	26.2771	1131.38	26.2771	95.9738
-PENN J-5 Spot 3	145.515	43835.4	2.23126	12.9108	0.699979	2.00457	1.1666	0.187786	0.933268	0.799988	1109.37	9.5115	1117.06	7.90316	1132.04	13.9183	1132.04	13.9183	97.9975
-PENN J-5 Spot 256	66.5952	50892.2	3.25113	12.9107	0.808077	2.09257	1.34565	0.196028	1.076	0.799615	1153.95	11.3686	1146.37	9.24555	1132.04	16.0824	1132.04	16.0824	101.935
-PENN J-5 Spot 169	79.9075	73930.2	2.06852	12.9051	0.919009	2.01658	1.52336	0.188828	1.21492	0.79753	1115.02	12.4398	1121.11	10.3406	1132.91	18.2773	1132.91	18.2773	98.4215
-PENN J-5 Spot 59	558.19	647343	2.7691	12.8896	0.623557	2.07609	1.68298	0.194166	1.5632	0.928829	1143.91	16.3849	1140.94	11.5338	1135.34	12.3916	1135.34	12.3916	100.755
-PENN J-5 Spot 88	28.6454	9638.17	1.88585	12.8736	1.4449	2.02166	1.81849	0.188841	1.10417	0.607189	1115.09	11.3065	1122.82	12.3545	1137.81	28.7451	1137.81	28.7451	98.0032
-PENN J-5 Spot 27	58.5962	43112.6	2.40066	12.8664	0.899059	2.08862	1.42448	0.194986	1.10492	0.775663	1148.33	11.6223	1145.07	9.78129	1138.89	17.88	1138.89	17.88	100.829
-PENN J-5 Spot 287	29.7272	14309.4	2.92495	12.8554	1.41784	2.07379	1.81975	0.193437	1.1407	0.626846	1139.97	11.9187	1140.19	12.4667	1140.62	28.2142	1140.62	28.2142	99.9429
-PENN J-5 Spot 123	732.586	527099	14.6393	12.8377	0.663274	2.04184	1.85993	0.190194	1.73764	0.934252	1122.43	17.9002	1129.58	12.6775	1143.36	13.1758	1143.36	13.1758	98.1689
-PENN J-5 Spot 296	65.1122	103343	2.32037	12.8324	1.11134	2.01436	1.61609	0.187557	1.17332	0.726022	1108.13	11.9457	1120.36	10.9662	1144.16	22.0703	1144.16	22.0703	96.8508
-PENN J-5 Spot 171	60.403	311143	3.62892	12.8224	1.01527	2.04735	1.44324	0.19048	1.02575	0.710728	1123.97	10.58	1131.41	9.84581	1145.74	20.1564	1145.74	20.1564	98.1004
-PENN J-5 Spot 228	329.211	129264	3.37331	12.8048	0.880829	2.07709	1.6558	0.192981	1.40208	0.846766	1137.5	14.6208	1141.28	11.3494	1148.45	17.4895	1148.45	17.4895	99.0474
-PENN J-5 Spot 205	133.493	186387	1.84135	12.765	0.810701	2.17762	1.24295	0.201693	0.942168	0.758012	1184.41	10.194	1173.92	8.64914	1154.61	16.0919	1154.61	16.0919	102.581
-PENN J-5 Spot 16	376.668	92709.2	2.29133	12.7424	0.683577	2.02621	1.78244	0.187337	1.64615	0.923538	1106.93	16.7432	1124.35	12.1185	1158.12	13.5679	1158.12	13.5679	95.5799
-PENN J-5 Spot 178	203.651	35055.1	2.53054	12.7409	0.67976	2.11817	1.26747	0.195816	1.06977	0.84402	1152.81	11.2926	1154.74	8.7426	1158.36	13.4825	1158.36	13.4825	99.5209
-PENN J-5 Spot 246	156.478	88011.6	2.92297	12.7063	0.726579	2.04881	1.33449	0.18889	1.11935	0.838785	1115.36	11.4644	1131.9	9.106	1163.74	14.4181	1163.74	14.4181	95.8426
-PENN J-5 Spot 92	121.284	159694	3.56362	12.6625	0.823223	2.09559	1.49214	0.192537	1.24451	0.834039	1135.1	12.9526	1147.36	10.2569	1170.62	16.3165	1170.62	16.3165	96.9662
-PENN J-5 Spot 203	355.782	64156.6	2.31184	12.6511	0.638363	2.16016	2.08842	0.198291	1.98847	0.952138	1166.13	21.2118	1168.32	14.4962	1172.41	12.6529	1172.41	12.6529	99.4647
-PENN J-5 Spot 289	111.717	61045.8	2.86199	12.6306	0.873114	2.14859	1.60046	0.196908	1.34132	0.838084	1158.69	14.225	1164.6	11.0899	1175.62	17.2738	1175.62	17.2738	98.5598
-PENN J-5 Spot 70	331.045	48989.3	1.45525	12.5815	0.850289	2.13691	1.63197	0.195077	1.39295	0.853544	1148.82	14.6577	1160.82	11.2887	1183.32	16.8211	1183.32	16.8211	97.0848
-PENN J-5 Spot 241	68.5128	119912	1.38304	12.5592	0.855033	2.14921	1.45377	0.195851	1.17574	0.808754	1152.99	12.4131	1164.8	10.0744	1186.83	16.8882	1186.83	16.8882	97.1493
-PENN J-5 Spot 260	143.162	25162	2.50605	12.5553	0.801511	2.3048	1.32563	0.209965	1.05588	0.796511	1228.63	11.8116	1213.76	9.38759	1187.44	15.8121	1187.44	15.8121	103.469
-PENN J-5 Spot 162	267.779	809648	2.33462	12.5217	0.600296	2.1742	1.29408	0.197538	1.14643	0.8859	1162.08	12.1907	1172.82	9.00055	1192.72	11.8463	1192.72	11.8463	97.4313
-PENN J-5 Spot 40	284.371	154023	2.46413	12.4882	0.840654	2.2259	1.5498	0.201694	1.30199	0.840102	1184.41	14.0872	1189.23	10.8587	1198.01	16.5631	1198.01	16.5631	98.8649
-PENN J-5 Spot 282	1119.34	152129	4.30205	12.4395	0.764976	2.27406	1.74198	0.205256	1.56503	0.898418	1203.49	17.1814	1204.28	12.286	1205.7	15.0503	1205.7	15.0503	99.8165
-PENN J-5 Spot 32	38.3933	31526.8	1.08279	12.4109	1.23943	2.26511	1.76292	0.203977	1.25367	0.711134	1196.65	13.6919	1201.5	12.4187	1210.21	24.3983	1210.21	24.3983	98.8796
-PENN J-5 Spot 5	139.803	197399	0.965046	12.4108	0.775101	2.35381	1.4622	0.211963	1.23986	0.84794	1239.27	13.9785	1228.71	10.4204	1210.22	15.2392	1210.22	15.2392	102.4
-PENN J-5 Spot 108	107.66	408674	4.31801	12.3787	0.846532	2.31696	1.43552	0.208104	1.15935	0.80762	1218.71	12.8739	1217.49	10.182	1215.32	16.6671	1215.32	16.6671	100.279
-PENN J-5 Spot 207	334.539	12644.7	3.9672	12.3733	1.01104	1.87102	1.60838	0.167977	1.25087	0.777721	1000.95	11.597	1070.89	10.6433	1216.22	19.8661	1216.22	19.8661	82.3004
-PENN J-5 Spot 224	45.6566	69679.9	1.12365	12.1878	1.01318	2.28864	1.59521	0.202392	1.23214	0.772399	1188.16	13.3698	1208.79	11.2726	1245.83	19.8553	1245.83	19.8553	95.3707
-PENN J-5 Spot 42	273.766	53251.3	2.08088	12.1262	0.754531	2.41171	1.35543	0.212196	1.126	0.830732	1240.51	12.7064	1246.09	9.72912	1255.77	14.7569	1255.77	14.7569	98.7843
-PENN J-5 Spot 49	62.7158	15143.6	2.44589	12.1005	0.687435	2.47297	1.13958	0.217124	0.908892	0.797565	1266.66	10.4521	1264.16	8.23955	1259.93	13.4347	1259.93	13.4347	100.534
-PENN J-5 Spot 179	302.326	197784	5.29413	12.0263	0.823014	2.37656	1.53401	0.207381	1.29454	0.843893	1214.85	14.3337	1235.58	10.9635	1271.89	16.0405	1271.89	16.0405	95.5151
-PENN J-5 Spot 98	307.534	137517	2.02245	12.0033	0.691141	2.51565	1.38283	0.219099	1.19772	0.866139	1277.11	13.8764	1276.56	10.0475	1275.62	13.4599	1275.62	13.4599	100.117
-PENN J-5 Spot 248	194.329	103040	2.37166	11.9586	0.867615	2.57567	1.38956	0.223489	1.08541	0.78112	1300.29	12.7812	1293.75	10.1638	1282.91	16.9025	1282.91	16.9025	101.355
-PENN J-5 Spot 131	72.4326	31604.7	1.63665	11.9502	1.13984	2.01285	2.52806	0.174532	2.25651	0.892587	1037.03	21.6156	1119.85	17.1511	1284.27	22.1821	1284.27	22.1821	80.7488
-PENN J-5 Spot 102	72.7215	1.78899e+06	1.86181	11.8452	0.899956	2.6175	1.52412	0.224966	1.23005	0.807057	1308.06	14.5625	1305.56	11.1981	1301.45	17.4867	1301.45	17.4867	100.508
-PENN J-5 Spot 136	149.81	118597	2.25597	11.8414	0.726794	2.56133	1.24501	0.220068	1.01085	0.811922	1282.23	11.7538	1289.67	9.09217	1302.07	14.1209	1302.07	14.1209	98.4768
-PENN J-5 Spot 58	253.683	62401.3	2.30149	11.7973	0.674249	2.58276	1.37367	0.221084	1.19682	0.871252	1287.6	13.9688	1295.77	10.0553	1309.3	13.0864	1309.3	13.0864	98.3424
-PENN J-5 Spot 196	286.223	60093.9	2.42794	11.717	0.708428	2.63681	1.37253	0.224173	1.17557	0.8565	1303.89	13.8774	1310.97	10.1047	1322.55	13.7231	1322.55	13.7231	98.5892
-PENN J-5 Spot 234	429.528	528275	2.02229	11.6669	0.727267	2.78852	1.60452	0.236057	1.43024	0.891378	1366.17	17.6078	1352.47	11.9923	1330.85	14.0724	1330.85	14.0724	102.654
-PENN J-5 Spot 227	558.73	274461	3.88566	11.6557	0.863981	2.50448	2.11694	0.211809	1.9326	0.912925	1238.45	21.7757	1273.33	15.3626	1332.7	16.7132	1332.7	16.7132	92.9276
-PENN J-5 Spot 199	192.976	68148	1.94464	11.6098	0.935836	2.64671	1.42554	0.222955	1.07535	0.754346	1297.47	12.638	1313.73	10.5059	1340.34	18.0843	1340.34	18.0843	96.8015
-PENN J-5 Spot 226	136.352	38760.7	1.81965	11.5755	0.850827	2.70171	1.24783	0.226916	0.912778	0.731494	1318.32	10.8826	1328.93	9.24768	1346.06	16.4291	1346.06	16.4291	97.9389
-PENN J-5 Spot 129	462.233	79536.7	4.40765	11.5597	0.775521	2.87217	2.06557	0.240905	1.91445	0.926842	1391.4	23.9592	1374.64	15.5582	1348.68	14.9698	1348.68	14.9698	103.168
-PENN J-5 Spot 18	52.9859	18841.4	2.16743	11.5109	1.11226	2.92241	1.89667	0.244083	1.53631	0.810003	1407.89	19.4306	1387.73	14.3496	1356.85	21.4451	1356.85	21.4451	103.762
-PENN J-5 Spot 174	448.07	67197	1.7904	11.4124	0.657731	2.78038	1.53337	0.230234	1.38514	0.903331	1335.73	16.7108	1350.28	11.4516	1373.39	12.6525	1373.39	12.6525	97.2576
-PENN J-5 Spot 221	377.188	79239.5	2.61358	11.4121	0.790743	2.90081	1.71722	0.2402	1.52433	0.887671	1387.73	19.0318	1382.12	12.9672	1373.45	15.2108	1373.45	15.2108	101.04
-PENN J-5 Spot 145	149.47	79993.1	1.31638	11.3786	0.808684	2.58119	1.2692	0.213107	0.978214	0.770732	1245.35	11.0777	1295.32	9.28892	1379.1	15.5425	1379.1	15.5425	90.3015
-PENN J-5 Spot 285	242.196	1.29607e+06	1.79468	11.3021	0.786745	2.81112	1.39041	0.23053	1.14641	0.824517	1337.27	13.8451	1358.5	10.4139	1392.05	15.0941	1392.05	15.0941	96.0651
-PENN J-5 Spot 134	323.381	142361	1.74865	11.201	0.832154	3.00597	1.68719	0.244303	1.46769	0.869905	1409.03	18.5762	1409.13	12.8556	1409.28	15.9279	1409.28	15.9279	99.9823
-PENN J-5 Spot 183	117.353	32712.4	2.15933	10.981	0.884078	3.17772	1.41606	0.25319	1.10618	0.781166	1454.9	14.407	1451.76	10.9371	1447.14	16.8352	1447.14	16.8352	100.536
-PENN J-5 Spot 237	412.549	164037	2.00111	10.9465	0.796951	3.06962	1.42433	0.243808	1.1805	0.828812	1406.46	14.917	1425.14	10.9091	1453.14	15.1638	1453.14	15.1638	96.788
-PENN J-5 Spot 299	405.363	115326	2.44752	10.9299	0.630937	3.1262	1.72725	0.247925	1.60789	0.930896	1427.77	20.5925	1439.16	13.2885	1456.02	12.0003	1456.02	12.0003	98.0594
-PENN J-5 Spot 310	288.529	147346	1.21192	10.8923	0.847727	3.20961	1.76448	0.253664	1.5475	0.877027	1457.34	20.1849	1459.48	13.661	1462.57	16.1095	1462.57	16.1095	99.6426
-PENN J-5 Spot 97	83.3628	65503	2.30447	10.8421	0.734053	3.1141	1.28334	0.244982	1.05267	0.820262	1412.54	13.3531	1436.18	9.86375	1471.34	13.9328	1471.34	13.9328	96.0036
-PENN J-5 Spot 273	133.793	60647.1	2.28141	10.8052	0.917678	3.26581	1.46318	0.256042	1.13963	0.778874	1469.56	14.9758	1472.95	11.3746	1477.81	17.4031	1477.81	17.4031	99.4415
-PENN J-5 Spot 212	423.091	431517	2.75075	10.7783	0.773056	3.18102	1.61303	0.248775	1.41571	0.877674	1432.15	18.181	1452.56	12.4617	1482.53	14.6511	1482.53	14.6511	96.6021
-PENN J-5 Spot 177	199.177	183961	2.40212	10.7757	0.711903	3.23641	1.20827	0.253045	0.976273	0.807993	1454.16	12.7093	1465.93	9.37285	1482.99	13.4913	1482.99	13.4913	98.0558
-PENN J-5 Spot 53	400.934	245591	2.28883	10.7689	0.883981	3.15286	1.72768	0.246357	1.4844	0.859189	1419.66	18.9144	1445.7	13.3191	1484.19	16.7498	1484.19	16.7498	95.652
-PENN J-5 Spot 176	232.974	108222	2.01846	10.7602	0.708194	3.36455	1.48245	0.262685	1.30235	0.878513	1503.57	17.4658	1496.18	11.6042	1485.72	13.4161	1485.72	13.4161	101.201
-PENN J-5 Spot 25	770.323	585206	1.08972	10.7222	0.681689	3.39457	1.55736	0.264094	1.40024	0.899111	1510.75	18.8582	1503.14	12.2154	1492.41	12.9024	1492.41	12.9024	101.229
-PENN J-5 Spot 194	668.325	395489	2.68755	10.7031	0.781444	3.3735	1.60421	0.261985	1.40101	0.873335	1499.99	18.7493	1498.26	12.5651	1495.8	14.7838	1495.8	14.7838	100.28
-PENN J-5 Spot 107	345.859	1.09397e+06	3.46669	10.6847	0.654604	3.22114	1.41938	0.249723	1.25942	0.887302	1437.05	16.2231	1462.26	10.9983	1499.05	12.3788	1499.05	12.3788	95.8637
-PENN J-5 Spot 105	186.403	1.52767e+06	1.80226	10.6818	0.852445	3.36079	1.48314	0.26048	1.21369	0.818324	1492.3	16.1683	1495.31	11.6067	1499.56	16.1191	1499.56	16.1191	99.5157
-PENN J-5 Spot 301	636.922	106438	2.57811	10.6323	0.883658	3.45005	1.5448	0.266159	1.2671	0.820238	1521.28	17.1705	1515.88	12.1614	1508.34	16.6882	1508.34	16.6882	100.858
-PENN J-5 Spot 238	249.819	61777.2	2.35616	10.5345	0.659648	3.36874	1.39239	0.257496	1.22622	0.880658	1477.02	16.1865	1497.16	10.9023	1525.76	12.4284	1525.76	12.4284	96.8052
-PENN J-5 Spot 300	822.647	68939.1	3.15599	10.3369	0.683051	3.44774	1.82753	0.258591	1.69508	0.927527	1482.63	22.4512	1515.35	14.3853	1561.36	12.8107	1561.36	12.8107	94.9578
-PENN J-5 Spot 166	265.308	379563	2.24013	10.2155	0.731069	3.63137	1.20655	0.269164	0.959849	0.795529	1536.56	13.1226	1556.43	9.60618	1583.49	13.6701	1583.49	13.6701	97.0361
-PENN J-5 Spot 118	86.4443	38953.2	1.87121	10.16	0.961099	3.65363	1.60936	0.269342	1.29086	0.802097	1537.46	17.6573	1561.3	12.8303	1593.68	17.9499	1593.68	17.9499	96.4728
-PENN J-5 Spot 139	126.445	75318.1	1.64378	10.1583	0.913897	3.70529	1.49187	0.273105	1.17918	0.790404	1556.54	16.3066	1572.51	11.9293	1593.99	17.0676	1593.99	17.0676	97.6509
-PENN J-5 Spot 140	542.296	164284	1.13003	10.1387	0.754676	3.57309	1.69535	0.262854	1.51812	0.895459	1504.42	20.3698	1543.57	13.4508	1597.59	14.0873	1597.59	14.0873	94.1684
-PENN J-5 Spot 78	574.496	24643.2	6.12874	10.0926	0.886917	3.42888	1.99896	0.251099	1.79143	0.896181	1444.14	23.1778	1511.04	15.7155	1606.09	16.536	1606.09	16.536	89.9165
-PENN J-5 Spot 275	247.789	79349.6	4.53309	10.0121	0.720186	3.93687	1.11866	0.285998	0.856001	0.7652	1621.5	12.272	1621.29	9.05816	1621.01	13.4011	1621.01	13.4011	100.03
-PENN J-5 Spot 60	434.26	222599	4.21822	10.0081	0.715074	3.93392	1.67147	0.28567	1.51079	0.903869	1619.85	21.6401	1620.69	13.5328	1621.75	13.3047	1621.75	13.3047	99.8831
-PENN J-5 Spot 163	184.274	67561	2.08993	10.0057	0.616725	3.76845	1.2074	0.27359	1.03801	0.859707	1559	14.3744	1586.05	9.689	1622.19	11.4739	1622.19	11.4739	96.1047
-PENN J-5 Spot 13	98.5336	29280.9	1.18275	9.9738	0.837065	3.94192	1.45125	0.28527	1.18552	0.816894	1617.85	16.9625	1622.33	11.7545	1628.13	15.562	1628.13	15.562	99.3682
-PENN J-5 Spot 54	167.51	80252.7	1.94299	9.94752	0.689616	3.976	1.39359	0.286978	1.211	0.868979	1626.41	17.4077	1629.31	11.307	1633.04	12.8123	1633.04	12.8123	99.5943
-PENN J-5 Spot 26	133.31	46010	0.726469	9.94485	0.764495	4.04239	1.24982	0.291691	0.988741	0.791104	1649.98	14.3935	1642.77	10.1741	1633.54	14.2028	1633.54	14.2028	101.006
-PENN J-5 Spot 270	362.535	70802.2	6.84653	9.931	0.74464	3.94058	1.47892	0.28395	1.27778	0.863995	1611.22	18.2167	1622.06	11.9778	1636.13	13.8309	1636.13	13.8309	98.478
-PENN J-5 Spot 265	362.173	3.25359e+06	3.35367	9.91896	0.84639	3.96439	1.35397	0.285319	1.05682	0.780532	1618.09	15.1231	1626.94	10.9791	1638.38	15.7164	1638.38	15.7164	98.7619
-PENN J-5 Spot 52	163.439	75807	1.07737	9.91841	0.599643	4.01531	1.23566	0.288968	1.08041	0.874359	1636.37	15.6141	1637.3	10.0454	1638.48	11.1343	1638.48	11.1343	99.871
-PENN J-5 Spot 302	439.392	100341	2.8168	9.91409	0.586716	4.06923	1.4353	0.292721	1.3099	0.912635	1655.11	19.1209	1648.16	11.6994	1639.29	10.8932	1639.29	10.8932	100.965
-PENN J-5 Spot 312	260.846	151076	2.16858	9.90907	0.806463	4.1111	1.28129	0.295582	0.995649	0.777069	1669.36	14.6433	1656.51	10.4649	1640.23	14.9714	1640.23	14.9714	101.776
-PENN J-5 Spot 262	275.882	137872	1.85331	9.88435	0.770296	3.95305	1.49635	0.28351	1.28285	0.857321	1609.01	18.2669	1624.62	12.1267	1644.87	14.2914	1644.87	14.2914	97.8204
-PENN J-5 Spot 308	522.171	216396	1.82184	9.87045	0.710104	4.09827	1.83699	0.293511	1.69419	0.922265	1659.05	24.7821	1653.96	14.995	1647.48	13.1702	1647.48	13.1702	100.703
-PENN J-5 Spot 68	467.477	616135	1.53286	9.86383	0.814002	4.12057	1.86795	0.294911	1.68126	0.900057	1666.02	24.6835	1658.39	15.264	1648.72	15.0931	1648.72	15.0931	101.049
-PENN J-5 Spot 211	118.008	34943.8	1.50952	9.86016	0.840311	4.03195	1.55794	0.288461	1.31189	0.842067	1633.83	18.9336	1640.66	12.676	1649.41	15.5796	1649.41	15.5796	99.0555
-PENN J-5 Spot 10	79.0624	736070	0.776912	9.83272	0.853813	3.84451	1.38871	0.274285	1.09522	0.788663	1562.52	15.197	1602.12	11.1905	1654.58	15.8196	1654.58	15.8196	94.4359
-PENN J-5 Spot 200	419	252108	2.39542	9.8066	0.812697	4.02518	1.76868	0.286412	1.57091	0.888181	1623.57	22.5466	1639.3	14.386	1659.5	15.0482	1659.5	15.0482	97.8349
-PENN J-5 Spot 87	313.71	134642	2.15747	9.78799	0.64087	4.2689	1.1658	0.303178	0.973841	0.835344	1707.05	14.605	1687.39	9.59094	1663.02	11.8608	1663.02	11.8608	102.647
-PENN J-5 Spot 254	204.916	151646	1.00626	9.74488	0.62435	4.06931	1.31199	0.28773	1.15391	0.879511	1630.17	16.6208	1648.17	10.6942	1671.18	11.543	1671.18	11.543	97.5461
-PENN J-5 Spot 104	213.496	99794.5	1.44214	9.71811	0.888561	4.373	1.43793	0.308353	1.13053	0.786221	1732.6	17.1761	1707.25	11.8836	1676.27	16.418	1676.27	16.418	103.36
-PENN J-5 Spot 186	137.99	56686.2	1.97971	9.66019	0.787482	4.29732	1.49269	0.301211	1.26807	0.849519	1697.31	18.9229	1692.85	12.296	1687.31	14.5314	1687.31	14.5314	100.593
-PENN J-5 Spot 85	450.641	1.13699e+06	23.5195	9.63387	0.627906	4.36069	1.40269	0.30482	1.2543	0.894212	1715.17	18.8892	1704.92	11.5863	1692.34	11.5775	1692.34	11.5775	101.349
-PENN J-5 Spot 236	173.733	65770.7	1.14626	9.58906	0.829943	4.22359	1.29648	0.293864	0.996023	0.76825	1660.81	14.583	1678.62	10.6445	1700.93	15.2869	1700.93	15.2869	97.641
-PENN J-5 Spot 295	137.025	294072	2.00649	9.55779	0.713769	4.50189	1.24491	0.312205	1.01996	0.819309	1751.55	15.6438	1731.32	10.3434	1706.94	13.1368	1706.94	13.1368	102.613
-PENN J-5 Spot 111	339.833	51181.9	2.20178	9.46301	0.631145	4.71211	1.32377	0.323543	1.16362	0.879024	1807.01	18.3369	1769.39	11.0886	1725.27	11.5908	1725.27	11.5908	104.738
-PENN J-5 Spot 290	471.727	226600	2.87936	9.44072	0.820568	4.51551	2.07946	0.309314	1.91071	0.91885	1737.33	29.0986	1733.83	17.2879	1729.6	15.0597	1729.6	15.0597	100.447
-PENN J-5 Spot 89	374.329	122462	4.14235	9.41597	0.760058	4.58455	1.47931	0.31322	1.26912	0.857914	1756.53	19.5134	1746.46	12.3316	1734.41	13.9406	1734.41	13.9406	101.275
-PENN J-5 Spot 29	168.897	72467.1	5.1007	9.35388	0.718663	4.65125	1.22822	0.315682	0.99602	0.810944	1768.61	15.4059	1758.52	10.2647	1746.54	13.1613	1746.54	13.1613	101.264
-PENN J-5 Spot 82	189.697	156311	2.86417	9.31432	0.911119	4.61144	1.42263	0.311656	1.09258	0.768003	1748.85	16.7352	1751.34	11.8715	1754.29	16.6704	1754.29	16.6704	99.6897
-PENN J-5 Spot 6	371.874	932491	7.82549	9.28887	0.701046	4.56946	1.44269	0.307975	1.26091	0.873998	1730.73	19.139	1743.71	12.0192	1759.3	12.82	1759.3	12.82	98.3761
-PENN J-5 Spot 242	125.658	60869.5	2.10704	9.18547	0.8234	4.57593	1.23599	0.304978	0.921779	0.745784	1715.94	13.8871	1744.89	10.2996	1779.75	15.0177	1779.75	15.0177	96.4152
-PENN J-5 Spot 36	415.071	267657	4.42459	9.06372	0.926625	4.76494	2.03469	0.313366	1.81144	0.89028	1757.25	27.8619	1778.74	17.0778	1804.04	16.8501	1804.04	16.8501	97.406
-PENN J-5 Spot 250	256.256	431685	2.28565	9.05916	0.715492	4.8795	1.25388	0.320738	1.0297	0.821212	1793.33	16.12	1798.72	10.5666	1804.96	13.0088	1804.96	13.0088	99.356
-PENN J-5 Spot 206	489.257	78085.4	2.12597	9.00877	0.822939	4.83619	1.72855	0.316123	1.52008	0.879398	1770.77	23.5367	1791.21	14.545	1815.1	14.9441	1815.1	14.9441	97.5578
-PENN J-5 Spot 77	365.371	97167.1	1.99242	8.93885	0.676566	4.97937	1.19904	0.322957	0.989922	0.825598	1804.15	15.5782	1815.83	10.139	1829.23	12.2646	1829.23	12.2646	98.6291
-PENN J-5 Spot 11	98.3539	37772.8	1.57175	8.93021	0.684614	4.82169	1.10584	0.312427	0.868438	0.78532	1752.64	13.327	1788.69	9.30003	1830.98	12.4097	1830.98	12.4097	95.7213
-PENN J-5 Spot 9	37.5179	31560.1	0.903202	8.88933	0.846603	4.98024	1.41879	0.321223	1.13853	0.80246	1795.7	17.844	1815.97	11.9978	1839.3	15.3286	1839.3	15.3286	97.6297
-PENN J-5 Spot 279	734.338	3070.49	3.02651	8.8422	6.45329	1.66619	8.06241	0.106899	4.83297	0.599444	654.712	30.0885	995.736	51.2031	1848.92	116.832	1848.92	116.832	35.4106
-PENN J-5 Spot 311	286.218	75238.5	3.06129	8.713	0.730865	5.25503	1.31596	0.332223	1.09435	0.831594	1849.15	17.5925	1861.59	11.2263	1875.49	13.1769	1875.49	13.1769	98.5953
-PENN J-5 Spot 99	249.823	215304	2.42036	8.64216	0.7814	5.35682	1.21221	0.335906	0.926756	0.764515	1866.94	15.0219	1877.98	10.3727	1890.2	14.0613	1890.2	14.0613	98.7698
-PENN J-5 Spot 94	124.151	127508	6.04944	8.62849	0.708282	5.46344	1.41293	0.342049	1.22259	0.865283	1896.52	20.0872	1894.87	12.1276	1893.04	12.741	1893.04	12.741	100.184
-PENN J-5 Spot 38	235.997	136591	2.16046	8.36025	0.76286	5.0402	1.36111	0.305742	1.12723	0.828174	1719.72	17.0149	1826.1	11.5329	1949.67	13.633	1949.67	13.633	88.2058
-PENN J-5 Spot 168	177.242	78163.6	1.77753	8.18641	0.650338	5.83556	1.20971	0.346628	1.02003	0.843201	1918.48	16.9257	1951.71	10.4866	1987.13	11.5712	1987.13	11.5712	96.5452
-PENN J-5 Spot 154	127.087	76007.5	1.41217	8.11902	0.760744	6.09955	1.43319	0.359326	1.21463	0.847495	1978.98	20.698	1990.18	12.5033	2001.82	13.5106	2001.82	13.5106	98.859
-PENN J-5 Spot 28	43.0854	19408.7	0.857244	6.29459	0.548456	9.60293	1.15698	0.43859	1.01872	0.880502	2344.32	20.0215	2397.45	10.6402	2442.88	9.28663	2442.88	9.28663	95.9655
-PENN J-5 Spot 259	48.4658	73886.6	0.292718	6.19318	0.954227	10.1976	1.51069	0.458247	1.17117	0.775253	2431.81	23.7251	2452.86	13.9703	2470.34	16.11	2470.34	16.11	98.4405
-PENN J-5 Spot 192	267.551	7099.63	2.30618	5.44423	0.93081	11.3264	1.35461	0.447419	0.984157	0.726523	2383.77	19.6112	2550.38	12.6393	2685.66	15.3885	2685.66	15.3885	88.7592
-PENN J-5 Spot 283	56.4488	182414	1.24991	5.4355	0.967652	13.0899	1.39108	0.516255	0.999373	0.718416	2683.28	21.9351	2686.16	13.123	2688.31	15.9938	2688.31	15.9938	99.813
-PENN J-5 Spot 147	71.7441	75549.4	0.865929	5.26562	0.896201	13.714	1.44592	0.523963	1.13468	0.784748	2715.97	25.1489	2730.16	13.6846	2740.66	14.7404	2740.66	14.7404	99.0989
-PENN J-5 Spot 20	275.089	539014	2.08997	5.26099	0.664521	13.0614	1.72595	0.498593	1.59289	0.922909	2607.75	34.1642	2684.1	16.2801	2742.11	10.9274	2742.11	10.9274	95.1
-PENN J-5 Spot 235	107.627	158560	2.34992	5.23892	0.86124	13.3931	1.87147	0.509109	1.66152	0.887818	2652.82	36.1342	2707.77	17.6841	2749.02	14.1544	2749.02	14.1544	96.5007
-PENN J-5 Spot 144	91.7722	371333	1.11321	5.23282	0.764143	13.5837	1.46302	0.515753	1.2476	0.852759	2681.14	27.366	2721.13	13.8375	2750.94	12.5594	2750.94	12.5594	97.4629
-PENN J-5 Spot 4	551.276	185117	16.8977	5.2218	0.871195	12.8418	1.39151	0.486555	1.08505	0.779761	2555.76	22.8939	2668.11	13.1092	2754.4	14.3143	2754.4	14.3143	92.7881
-PENN J-5 Spot 305	67.6859	169099	2.0603	5.19374	0.927323	13.9661	1.54607	0.526314	1.2371	0.800156	2725.9	27.4996	2747.41	14.6507	2763.25	15.224	2763.25	15.224	98.6484
-PENN J-5 Spot 47	108.152	63935.5	1.01732	5.18892	0.637696	13.9154	1.29299	0.523913	1.1248	0.869919	2715.75	24.9283	2743.96	12.2492	2764.77	10.4675	2764.77	10.4675	98.2269
-PENN J-5 Spot 264	212.89	92554.6	1.25905	5.16139	0.805578	14.1765	1.23873	0.530911	0.941011	0.759657	2745.29	21.0371	2761.58	11.7496	2773.5	13.2092	2773.5	13.2092	98.9828
-PENN J-5 Spot 43	86.3396	70039.3	1.50829	5.04704	0.683866	14.3059	1.21818	0.52389	1.00811	0.827556	2715.65	22.3416	2770.21	11.5616	2810.18	11.1792	2810.18	11.1792	96.6364
-PENN J-5 Spot 7	29.6491	98437.6	0.738686	5.03901	0.726978	14.8686	1.40474	0.543628	1.202	0.855673	2798.62	27.2888	2806.86	13.3654	2812.78	11.8811	2812.78	11.8811	99.4965
-PENN J-5 Spot 51	165.583	258159	1.32007	5.0379	0.692798	14.7882	1.16614	0.540569	0.938037	0.804395	2785.83	21.2183	2801.71	11.0912	2813.14	11.3221	2813.14	11.3221	99.0291
-PENN J-5 Spot 180	120.084	238590	2.62238	4.94985	0.757971	15.4398	1.38118	0.554526	1.15462	0.835964	2843.97	26.5512	2842.77	13.172	2841.91	12.3519	2841.91	12.3519	100.072
-PENN J-5 Spot 81	309.578	133243	11.6606	4.90697	0.665402	14.9008	1.23405	0.530529	1.03929	0.842177	2743.68	23.2233	2808.92	11.7428	2856.09	10.8328	2856.09	10.8328	96.0644
-PENN J-5 Spot 24	148.195	65312.4	1.11102	4.44163	0.858202	18.2263	1.28706	0.587391	0.959179	0.745246	2978.84	22.8804	3001.75	12.3895	3017.13	13.7778	3017.13	13.7778	98.7308
-PENN J-5 Spot 15	135.413	72956.9	2.30327	4.22104	0.708303	18.9979	1.50989	0.581852	1.33345	0.88314	2956.3	31.6187	3041.71	14.5655	3098.61	11.2898	3098.61	11.2898	95.4074
PennJ6							Isotope ratios						Apparent ages (Ma)
Analysis	U	206Pb	U/Th	206Pb*	±	207Pb*	±	206Pb*	±	error	206Pb*	±	207Pb*	±	206Pb*	±	Best age	±	Conc
	(ppm)	204Pb		207Pb*	(%)	235U*	(%)	238U	(%)	corr.	238U*	(Ma)	235U	(Ma)	207Pb*	(Ma)	(Ma)	(Ma)	(%)
-Penn J-6 Spot 112	727.539	619.451	6.46837	3.13773	3.3793	1.44649	4.03577	0.032932	2.2063	0.546685	208.873	4.53449	908.416	24.2332	3562.89	52.0143	208.873	4.53449	NA
-Penn J-6 Spot 32	273.802	19641.2	1.30803	18.9925	1.02159	0.429521	1.68118	0.0591908	1.33519	0.794197	370.702	4.80996	362.837	5.12912	312.837	23.2336	370.702	4.80996	NA
-Penn J-6 Spot 306	164.965	24033	0.872677	18.6236	0.931477	0.441397	1.54674	0.0596459	1.23481	0.798331	373.472	4.48062	371.237	4.80946	357.29	21.0255	373.472	4.48062	NA
-Penn J-6 Spot 18	312.182	79483.7	1.54422	18.1957	0.842219	0.463944	1.48201	0.0612524	1.21943	0.822824	383.238	4.53712	386.997	4.76897	409.517	18.8398	383.238	4.53712	NA
-Penn J-6 Spot 161	125.305	27911.7	1.73734	18.216	1.08832	0.483257	1.35691	0.0638733	0.810396	0.597238	399.138	3.1365	400.305	4.48894	407.027	24.3549	399.138	3.1365	NA
-Penn J-6 Spot 314	304.538	246261	1.21308	18.0186	0.882145	0.48949	1.3589	0.063996	1.03365	0.760651	399.882	4.00778	404.563	4.53447	431.356	19.6577	399.882	4.00778	NA
-Penn J-6 Spot 28	9.45977	2489.93	2.58224	18.8651	4.14819	0.474502	4.41637	0.0649509	1.51554	0.343163	405.664	5.95855	394.294	14.4317	328.144	94.1452	405.664	5.95855	123.624
-Penn J-6 Spot 65	144.186	13601.3	2.87006	18.57	0.881789	0.485538	1.15678	0.0654219	0.748727	0.64725	408.515	2.96376	401.865	3.83904	363.787	19.8844	408.515	2.96376	112.295
-Penn J-6 Spot 96	95.3103	13750.3	1.99803	18.2231	1.14886	0.495582	1.41228	0.0655279	0.82137	0.581591	409.156	3.25626	408.707	4.75181	406.149	25.7146	409.156	3.25626	100.74
-Penn J-6 Spot 205	217.962	37983.8	1.35017	18.3631	0.994884	0.498036	1.48645	0.0663581	1.10441	0.742989	414.177	4.43038	410.372	5.01789	389.004	22.3349	414.177	4.43038	106.471
-Penn J-6 Spot 24	216.231	111043	1.09449	17.8007	0.87215	0.516868	1.24879	0.0667582	0.893777	0.715713	416.595	3.60567	423.057	4.32071	458.449	19.3438	416.595	3.60567	90.8706
-Penn J-6 Spot 233	392.048	111925	2.58709	18.0522	0.688537	0.509867	1.31422	0.0667843	1.11942	0.851772	416.753	4.5176	418.36	4.50629	427.208	15.354	416.753	4.5176	97.5528
-Penn J-6 Spot 59	729.228	138315	4.675	17.8496	0.526236	0.521376	1.26662	0.0675256	1.15213	0.90961	421.231	4.69798	426.07	4.40752	452.313	11.6866	421.231	4.69798	93.1281
-Penn J-6 Spot 12	11.8919	2464.64	2.11229	18.5067	3.739	0.504116	3.92586	0.0676935	1.19676	0.304839	422.245	4.8913	414.485	13.361	371.488	84.2117	422.245	4.8913	113.663
-Penn J-6 Spot 35	337.864	64423.3	1.33186	18.211	0.877573	0.512651	1.52448	0.0677395	1.24655	0.817692	422.523	5.09807	420.23	5.24611	407.647	19.6374	422.523	5.09807	103.649
-Penn J-6 Spot 154	129.216	15122.4	0.796919	18.5284	1.14403	0.504372	1.55844	0.0678071	1.05826	0.679052	422.931	4.33204	414.657	5.30541	368.851	25.7628	422.931	4.33204	114.662
-Penn J-6 Spot 228	668.678	154984	3.28755	18.3893	0.76651	0.511073	1.45635	0.0681925	1.23831	0.850284	425.257	5.09606	419.17	5.00145	385.793	17.2171	425.257	5.09606	110.229
-Penn J-6 Spot 212	271.371	57188.8	1.43749	17.9802	0.930796	0.523745	1.32666	0.0683287	0.945322	0.712561	426.079	3.89759	427.65	4.63019	436.104	20.7453	426.079	3.89759	97.7011
-Penn J-6 Spot 278	111.574	197227	1.34909	17.6416	1.31025	0.535736	1.62306	0.0685767	0.957903	0.590183	427.575	3.96288	435.609	5.74915	478.284	28.9833	427.575	3.96288	89.3977
-Penn J-6 Spot 293	380.461	196693	2.96813	18.1498	0.665728	0.521741	1.41353	0.0687089	1.24694	0.882149	428.373	5.16795	426.314	4.92098	415.173	14.8765	428.373	5.16795	103.179
-Penn J-6 Spot 138	223.794	119272	1.25577	17.9597	0.70065	0.528458	1.27655	0.0688647	1.06708	0.835912	429.312	4.43189	430.786	4.48153	438.654	15.6107	429.312	4.43189	97.8705
-Penn J-6 Spot 163	89.8052	10201.5	0.943302	18.1913	1.17342	0.523634	1.49832	0.0691162	0.931693	0.621825	430.829	3.88281	427.576	5.2286	410.058	26.2462	430.829	3.88281	105.065
-Penn J-6 Spot 286	122.265	33048.4	1.17658	17.9195	1.266	0.531657	1.52488	0.0691265	0.849995	0.557418	430.891	3.54283	432.909	5.37451	443.638	28.1728	430.891	3.54283	97.1267
-Penn J-6 Spot 113	504.994	110914	1.75425	17.8255	0.731065	0.535051	1.35747	0.0692028	1.14379	0.842593	431.351	4.77231	435.156	4.80435	455.323	16.2336	431.351	4.77231	94.7353
-Penn J-6 Spot 168	390.676	67781	1.04464	17.7032	0.750687	0.546189	1.54967	0.070159	1.35571	0.874837	437.114	5.72954	442.497	5.55846	470.601	16.5986	437.114	5.72954	92.8842
-Penn J-6 Spot 303	76.6501	104812	1.6906	18.1468	1.2365	0.535116	1.62451	0.0704591	1.05362	0.648575	438.921	4.47062	435.199	5.74995	415.533	27.6316	438.921	4.47062	105.628
-Penn J-6 Spot 198	475.159	201241	2.27184	17.8077	0.650748	0.556654	1.3328	0.0719251	1.16314	0.872701	447.743	5.03114	449.346	4.83941	457.578	14.4449	447.743	5.03114	97.8508
-Penn J-6 Spot 41	116.01	25299.6	1.16725	17.7186	1.08326	0.56131	1.49634	0.0721641	1.03226	0.689861	449.18	4.47887	452.379	5.46232	468.663	23.9977	449.18	4.47887	95.8429
-Penn J-6 Spot 119	194.077	46388.6	1.9655	17.5911	1.02378	0.566353	1.32784	0.0722885	0.845593	0.636819	449.928	3.67483	455.653	4.87502	484.628	22.605	449.928	3.67483	92.8399
-Penn J-6 Spot 6	342.593	38259.6	2.01817	17.9091	0.93514	0.556429	1.76613	0.0723055	1.49824	0.848318	450.031	6.51256	449.2	6.41118	444.926	20.7999	450.031	6.51256	101.147
-Penn J-6 Spot 244	320.073	35890	1.87632	17.9505	0.780574	0.558253	1.43466	0.0727101	1.20373	0.839033	452.463	5.25969	450.389	5.21888	439.791	17.3783	452.463	5.25969	102.881
-Penn J-6 Spot 149	171.149	106266	4.22412	17.5707	0.885304	0.570359	1.27337	0.0727152	0.915263	0.718773	452.493	3.99949	458.247	4.69609	487.179	19.5386	452.493	3.99949	92.8803
-Penn J-6 Spot 259	191.122	55696.6	1.93902	17.7187	1.00864	0.571724	1.43042	0.0735032	1.01427	0.709072	457.227	4.47689	459.129	5.28333	468.655	22.353	457.227	4.47689	97.5616
-Penn J-6 Spot 140	448.648	49346.2	1.66513	17.539	0.916703	0.579068	1.63832	0.0736921	1.35785	0.828805	458.361	6.00774	463.862	6.10047	491.212	20.2303	458.361	6.00774	93.3123
-Penn J-6 Spot 238	200.556	1.01783e+06	2.50645	17.8051	0.923775	0.575559	1.24634	0.0743568	0.836668	0.671298	462.351	3.73288	461.603	4.62302	457.88	20.4914	462.351	3.73288	100.976
-Penn J-6 Spot 158	175.535	49536.8	0.961967	17.5326	0.913458	0.585938	1.24859	0.0745392	0.851213	0.681741	463.445	3.80644	468.27	4.684	491.983	20.1227	463.445	3.80644	94.1995
-Penn J-6 Spot 67	106.471	13830.5	2.32496	18.0229	1.07756	0.57128	1.59206	0.074707	1.17198	0.736138	464.452	5.25181	458.842	5.87747	430.826	24.0331	464.452	5.25181	107.805
-Penn J-6 Spot 211	126.777	29123.7	1.36318	17.7832	0.901756	0.579471	1.30594	0.0747705	0.944631	0.723332	464.833	4.23638	464.122	4.86495	460.583	19.9932	464.833	4.23638	100.923
-Penn J-6 Spot 184	253.437	114194	1.78398	17.6946	0.791029	0.582383	1.17672	0.0747718	0.871177	0.740342	464.841	3.90703	465.991	4.39748	471.687	17.5136	464.841	3.90703	98.5485
-Penn J-6 Spot 223	233.808	24056.5	2.21437	17.9132	0.850899	0.575368	1.12603	0.0747835	0.737513	0.654965	464.911	3.30806	461.481	4.17588	444.422	18.9329	464.911	3.30806	104.61
-Penn J-6 Spot 98	773.171	28547.2	0.631081	15.7994	2.01595	0.663535	2.36521	0.0760661	1.23698	0.522992	472.599	5.63683	516.774	9.57952	717.168	42.8126	472.599	5.63683	65.8979
-Penn J-6 Spot 124	532.153	9004.56	1.75879	13.6038	2.06312	0.777276	2.50697	0.0767226	1.42423	0.568108	476.53	6.5421	583.928	11.1331	1027.12	41.7313	476.53	6.5421	46.395
-Penn J-6 Spot 219	118.25	9243.8	2.73955	17.9558	0.847862	0.592889	1.16344	0.0772442	0.7967	0.684777	479.653	3.68269	472.711	4.39709	439.131	18.8712	479.653	3.68269	109.228
-Penn J-6 Spot 74	641.27	9451.94	2.09533	13.659	2.73056	0.782819	3.00964	0.0775833	1.2657	0.420549	481.681	5.87444	587.09	13.4191	1018.92	55.3033	481.681	5.87444	47.2736
-Penn J-6 Spot 48	247.595	123090	2.80621	17.919	0.81958	0.598796	1.16854	0.0778542	0.832932	0.712797	483.302	3.87838	476.47	4.44388	443.691	18.2454	483.302	3.87838	108.927
-Penn J-6 Spot 187	238.334	18318.4	2.25259	16.3709	1.71827	0.662385	1.93611	0.0786811	0.892237	0.46084	488.246	4.19542	516.072	7.83335	641.279	36.9494	488.246	4.19542	76.1363
-Penn J-6 Spot 225	327.295	28435.1	0.679846	17.7851	0.720301	0.616745	1.06953	0.0795884	0.79061	0.739211	493.665	3.75727	487.805	4.14276	460.352	15.9907	493.665	3.75727	107.237
-Penn J-6 Spot 231	189.862	139283	0.968384	17.5344	0.919683	0.631185	1.28434	0.0803037	0.896506	0.698026	497.935	4.29597	496.834	5.04625	491.739	20.2951	497.935	4.29597	101.26
-Penn J-6 Spot 33	138.369	17170.7	2.74349	17.9221	0.87357	0.617922	1.22819	0.0803544	0.863327	0.702924	498.237	4.13939	488.544	4.76295	443.319	19.4474	498.237	4.13939	112.388
-Penn J-6 Spot 95	121.519	70706.7	1.82763	16.9796	0.9767	0.706892	1.32303	0.08709	0.892443	0.674547	538.304	4.60894	542.899	5.56352	562.219	21.2681	538.304	4.60894	95.7463
-Penn J-6 Spot 197	100.918	275896	2.60006	16.7491	1.01356	0.725514	1.43201	0.0881708	1.01161	0.706425	544.71	5.28396	553.917	6.11378	591.926	21.9645	544.71	5.28396	92.0232
-Penn J-6 Spot 144	152.08	92524.1	2.57928	17.3529	0.92506	0.720548	1.26731	0.0907241	0.866222	0.683512	559.818	4.64468	550.99	5.38906	514.641	20.2994	559.818	4.64468	108.778
-Penn J-6 Spot 5	40.7197	487490	1.17578	16.6374	1.61873	0.801491	1.99814	0.0967548	1.17145	0.58627	595.363	6.66201	597.669	9.0268	606.411	35.0301	595.363	6.66201	98.1781
-Penn J-6 Spot 19	205.149	92398.1	3.05613	16.5674	0.783773	0.831515	1.25173	0.0999566	0.975971	0.7797	614.155	5.7173	614.452	5.77037	615.528	16.9443	614.155	5.7173	99.7769
-Penn J-6 Spot 209	189.19	43926.8	2.40475	16.4306	0.667196	0.85846	1.2517	0.102343	1.05906	0.846095	628.127	6.33841	629.282	5.87086	633.451	14.3746	628.127	6.33841	99.1595
-Penn J-6 Spot 20	748.18	98634.4	4.68605	15.3163	0.632379	1.15214	1.33342	0.12804	1.17393	0.880389	776.673	8.58977	778.251	7.24835	782.761	13.287	776.673	8.58977	99.2222
-Penn J-6 Spot 252	337.459	278071	1.42452	14.3725	0.743033	1.33664	1.36621	0.139391	1.14649	0.839174	841.217	9.0417	861.768	7.93559	915.027	15.3078	841.217	9.0417	91.9335
-Penn J-6 Spot 80	82.83	17415.6	1.41637	14.4971	0.78614	1.42148	1.12377	0.149524	0.803018	0.714576	898.294	6.73343	897.983	6.69843	897.198	16.2203	898.294	6.73343	100.122
-Penn J-6 Spot 165	67.3684	45134.1	2.61039	14.2053	0.759527	1.51312	1.16044	0.155959	0.877354	0.75605	934.281	7.63065	935.701	7.0945	939.065	15.5635	939.065	15.5635	99.4906
-Penn J-6 Spot 69	21.8839	35051.6	3.32863	14.2011	1.74461	1.47274	1.99818	0.151752	0.974204	0.487545	910.779	8.27456	919.253	12.0846	939.667	35.7824	939.667	35.7824	96.9257
-Penn J-6 Spot 277	102.094	113438	2.83566	14.179	0.821787	1.5211	1.32865	0.156491	1.04403	0.785776	937.249	9.10704	938.918	8.13989	942.819	16.8557	942.819	16.8557	99.4092
-Penn J-6 Spot 117	209.696	46148.6	4.37609	14.1742	0.598398	1.59888	1.0523	0.164438	0.865596	0.822575	981.393	7.87988	969.772	6.57363	943.533	12.2479	943.533	12.2479	104.013
-Penn J-6 Spot 145	200.933	55516.4	2.74543	14.1232	0.701185	1.56708	1.12644	0.160588	0.881597	0.782638	960.044	7.86364	957.273	6.9823	950.914	14.3494	950.914	14.3494	100.96
-Penn J-6 Spot 105	37.126	4831.71	2.35671	14.1209	1.25217	1.62751	1.53654	0.166754	0.890509	0.579556	994.2	8.20452	980.899	9.66419	951.264	25.6214	951.264	25.6214	104.514
-Penn J-6 Spot 292	107.264	50601.6	1.79505	14.1195	0.838729	1.58496	1.1901	0.162377	0.844321	0.709452	969.976	7.60335	964.321	7.40947	951.447	17.162	951.447	17.162	101.947
-Penn J-6 Spot 7	81.0461	92100.2	3.15113	14.1064	0.903837	1.50466	1.32684	0.154008	0.971383	0.732102	923.392	8.35687	932.277	8.09371	953.323	18.4823	953.323	18.4823	96.8604
-Penn J-6 Spot 206	265.074	45843	1.8526	14.0315	0.670334	1.49922	1.27525	0.152636	1.08486	0.850701	915.722	9.26094	930.068	7.76772	964.245	13.6795	964.245	13.6795	94.9678
-Penn J-6 Spot 135	59.5384	40130.5	2.48457	14.01	0.956252	1.54951	1.54638	0.157514	1.21527	0.785879	942.949	10.6607	950.299	9.54327	967.38	19.5219	967.38	19.5219	97.4745
-Penn J-6 Spot 295	465.528	92987.8	1.55039	14.0068	0.599711	1.55849	1.33965	0.158391	1.19791	0.894202	947.827	10.5589	953.867	8.28608	967.837	12.2578	967.837	12.2578	97.9325
-Penn J-6 Spot 81	43.3609	145848	6.51427	14.0046	0.942176	1.49303	1.29716	0.151715	0.891582	0.687336	910.571	7.57119	927.552	7.8881	968.14	19.2159	968.14	19.2159	94.0536
-Penn J-6 Spot 162	136.308	27685.8	2.9616	14.0002	0.819205	1.62732	1.22348	0.165309	0.908738	0.742749	986.211	8.31021	980.823	7.69475	968.761	16.7032	968.761	16.7032	101.801
-Penn J-6 Spot 177	344.061	192658	10.3378	13.9261	0.709796	1.68143	1.1592	0.169901	0.916476	0.790612	1011.56	8.57997	1001.52	7.38087	979.631	14.4661	979.631	14.4661	103.26
-Penn J-6 Spot 78	91.8982	270475	2.93191	13.8517	0.815344	1.64743	1.37777	0.165577	1.11061	0.806094	987.695	10.1704	988.567	8.70561	990.523	16.5825	990.523	16.5825	99.7145
-Penn J-6 Spot 180	95.9579	93605.3	3.929	13.82	0.897833	1.71483	1.29433	0.171956	0.932296	0.720294	1022.88	8.81818	1014.09	8.3016	995.145	18.2476	995.145	18.2476	102.787
-Penn J-6 Spot 265	69.0695	139343	3.41886	13.818	0.93268	1.55239	1.45566	0.155645	1.11761	0.767768	932.528	9.70326	951.444	8.98988	995.437	18.9353	995.437	18.9353	93.6804
-Penn J-6 Spot 213	54.3787	8221.58	3.15625	13.7977	0.824742	1.70852	1.24599	0.171048	0.933959	0.749575	1017.88	8.79405	1011.73	7.98068	998.423	16.7351	998.423	16.7351	101.949
-Penn J-6 Spot 89	167.47	784812	3.76486	13.7868	0.705025	1.71211	1.36922	0.171271	1.17376	0.857245	1019.11	11.0643	1013.08	8.77688	1000.04	14.3052	1000.04	14.3052	101.907
-Penn J-6 Spot 178	573.947	372470	2.13344	13.7753	0.744001	1.68413	1.44742	0.16833	1.24157	0.857779	1002.91	11.5315	1002.54	9.22165	1001.74	15.0974	1001.74	15.0974	100.117
-Penn J-6 Spot 101	78.0194	18802.7	2.05146	13.7644	0.710738	1.67631	1.10873	0.167417	0.850957	0.767508	997.863	7.86682	999.581	7.05146	1003.33	14.4086	1003.33	14.4086	99.4549
-Penn J-6 Spot 262	44.5772	11614.1	3.12647	13.746	1.054	1.67999	1.25484	0.167559	0.680961	0.542669	998.65	6.29986	1000.98	7.98729	1006.06	21.3667	1006.06	21.3667	99.264
-Penn J-6 Spot 61	24.9757	19238.4	1.1643	13.7079	0.972655	1.77999	1.39714	0.177042	1.00297	0.717872	1050.79	9.725	1038.18	9.08355	1011.68	19.6991	1011.68	19.6991	103.866
-Penn J-6 Spot 271	139.982	563180	1.4486	13.7004	0.536772	1.63912	1.08911	0.162942	0.947648	0.870112	973.105	8.55934	985.374	6.86847	1012.79	10.8801	1012.79	10.8801	96.082
-Penn J-6 Spot 21	349.013	73414.4	3.78327	13.6996	0.659482	1.7318	1.42303	0.172144	1.26099	0.886131	1023.91	11.9383	1020.42	9.16021	1012.91	13.3672	1012.91	13.3672	101.086
-Penn J-6 Spot 159	102.917	40501.1	2.54049	13.6935	0.85077	1.80099	1.21526	0.178943	0.867788	0.714074	1061.2	8.49089	1045.82	7.9343	1013.81	17.2416	1013.81	17.2416	104.674
-Penn J-6 Spot 137	921.933	1.80273e+06	3.22876	13.6914	0.621729	1.75087	1.28227	0.173935	1.12145	0.874587	1033.76	10.7113	1027.48	8.28707	1014.12	12.5994	1014.12	12.5994	101.936
-Penn J-6 Spot 229	81.8057	37199.8	1.98146	13.6873	0.801826	1.69563	1.29248	0.168397	1.0137	0.784305	1003.27	9.4183	1006.89	8.25535	1014.74	16.2479	1014.74	16.2479	98.8704
-Penn J-6 Spot 16	136.002	102603	2.72105	13.6577	0.668935	1.7103	1.06793	0.169487	0.832468	0.779515	1009.29	7.77728	1012.4	6.84282	1019.12	13.5454	1019.12	13.5454	99.0353
-Penn J-6 Spot 130	125.182	80023	3.40585	13.6546	0.629932	1.7298	1.01653	0.171381	0.797827	0.78485	1019.72	7.52475	1019.68	6.54069	1019.57	12.7546	1019.57	12.7546	100.014
-Penn J-6 Spot 94	121.795	1.49486e+06	1.66378	13.6381	0.682164	1.78715	1.16921	0.176849	0.949587	0.812158	1049.74	9.19887	1040.79	7.6126	1022.02	13.8074	1022.02	13.8074	102.712
-Penn J-6 Spot 49	179.102	1.39827e+06	3.67392	13.6375	0.668357	1.71516	1.06359	0.169718	0.827356	0.777891	1010.56	7.73853	1014.22	6.82212	1022.11	13.5281	1022.11	13.5281	98.8704
-Penn J-6 Spot 104	11.0259	8223.73	2.92728	13.5971	2.06492	1.73908	2.60244	0.171574	1.58392	0.608628	1020.78	14.9532	1023.12	16.779	1028.12	41.7698	1028.12	41.7698	99.2861
-Penn J-6 Spot 294	64.8011	103389	1.90016	13.5915	0.930153	1.72659	1.50859	0.170272	1.18771	0.7873	1013.61	11.14	1018.48	9.70027	1028.95	18.826	1028.95	18.826	98.5089
-Penn J-6 Spot 260	182.418	2.0161e+06	3.2675	13.563	0.605622	1.72578	1.0628	0.169836	0.873364	0.821758	1011.21	8.17371	1018.18	6.83255	1033.18	12.2557	1033.18	12.2557	97.8732
-Penn J-6 Spot 155	79.4281	143455	1.88771	13.5273	1.06151	1.70546	1.40419	0.167395	0.919209	0.654619	997.74	8.49682	1010.58	8.98809	1038.51	21.4519	1038.51	21.4519	96.0743
-Penn J-6 Spot 92	34.9146	56523.8	2.08675	13.5196	1.10256	1.75369	1.40663	0.17203	0.873476	0.620971	1023.29	8.26486	1028.52	9.09617	1039.66	22.2769	1039.66	22.2769	98.4252
-Penn J-6 Spot 167	265.952	94102.2	1.56569	13.4927	0.758708	1.7891	1.27962	0.175154	1.03044	0.805265	1040.44	9.90065	1041.5	8.33473	1043.73	15.3253	1043.73	15.3253	99.6855
-Penn J-6 Spot 109	80.462	26280.9	1.54658	13.4846	0.736715	1.82132	1.17627	0.178202	0.916987	0.779571	1057.14	8.94074	1053.16	7.71044	1044.93	14.8788	1044.93	14.8788	101.169
-Penn J-6 Spot 247	352.013	1.48744e+06	3.21088	13.4798	0.645095	1.78247	1.15403	0.174339	0.956884	0.829171	1035.97	9.15753	1039.08	7.50662	1045.64	13.0294	1045.64	13.0294	99.0754
-Penn J-6 Spot 111	102.253	232360	2.52784	13.4753	0.565046	1.79914	1.06649	0.175911	0.904498	0.84811	1044.6	8.72258	1045.15	6.96038	1046.31	11.4147	1046.31	11.4147	99.8359
-Penn J-6 Spot 71	243.558	58206.5	1.6994	13.4655	1.06369	1.65863	1.48394	0.162054	1.03472	0.697279	968.182	9.30197	992.852	9.40048	1047.79	21.4656	1047.79	21.4656	92.4025
-Penn J-6 Spot 230	319.607	163075	3.32355	13.4582	0.626974	1.79024	1.10067	0.174818	0.904646	0.821903	1038.6	8.67785	1041.91	7.17076	1048.88	12.6577	1048.88	12.6577	99.0198
-Penn J-6 Spot 175	170.172	93969.9	3.61972	13.4414	0.720953	1.80331	1.24851	0.175874	1.01931	0.816424	1044.4	9.82802	1046.66	8.15509	1051.4	14.5466	1051.4	14.5466	99.334
-Penn J-6 Spot 207	313.251	155609	203.578	13.4251	0.707374	1.85477	1.40242	0.180673	1.21095	0.863473	1070.65	11.9457	1065.13	9.25208	1053.85	14.2679	1053.85	14.2679	101.595
-Penn J-6 Spot 102	63.531	54380.5	1.93672	13.4197	0.910955	1.88614	1.32626	0.183655	0.963907	0.726788	1086.91	9.64122	1076.22	8.80085	1054.66	18.3664	1054.66	18.3664	103.059
-Penn J-6 Spot 114	101.182	227133	4.03639	13.4006	0.754786	1.75387	1.09537	0.170534	0.793816	0.724698	1015.05	7.45529	1028.59	7.0836	1057.52	15.2154	1057.52	15.2154	95.9841
-Penn J-6 Spot 85	109.509	59810.9	2.75197	13.3982	0.834753	1.86191	1.41737	0.181006	1.14548	0.808173	1072.47	11.3174	1067.67	9.36328	1057.88	16.8238	1057.88	16.8238	101.379
-Penn J-6 Spot 312	178.86	149632	2.05845	13.3405	0.66417	1.76752	0.975069	0.17109	0.713889	0.732142	1018.11	6.72332	1033.61	6.32331	1066.57	13.3511	1066.57	13.3511	95.4572
-Penn J-6 Spot 308	255.275	123917	1.88576	13.3231	0.65528	1.82108	1.09636	0.176044	0.878983	0.801729	1045.32	8.48195	1053.07	7.18627	1069.2	13.1688	1069.2	13.1688	97.7672
-Penn J-6 Spot 115	413.899	233278	0.296278	13.3225	0.626463	1.87013	1.19876	0.180778	1.02204	0.852582	1071.22	10.087	1070.58	7.93123	1069.28	12.5902	1069.28	12.5902	100.182
-Penn J-6 Spot 93	76.8932	60878.7	1.61479	13.3206	0.713725	1.81991	1.17094	0.175899	0.928277	0.792762	1044.53	8.95136	1052.65	7.6734	1069.56	14.3238	1069.56	14.3238	97.6597
-Penn J-6 Spot 160	78.0351	133774	1.30351	13.2925	0.718027	1.88837	1.15909	0.18213	0.909904	0.785016	1078.6	9.03711	1077.01	7.69466	1073.81	14.4018	1073.81	14.4018	100.446
-Penn J-6 Spot 11	97.4876	61606.2	2.71917	13.2789	0.868726	1.77292	1.48398	0.17082	1.20312	0.810742	1016.63	11.3156	1035.59	9.63434	1075.86	17.4417	1075.86	17.4417	94.4945
-Penn J-6 Spot 147	59.1607	314216	1.00486	13.2747	0.711285	1.92316	1.15818	0.185237	0.914037	0.789199	1095.52	9.20885	1089.17	7.73711	1076.48	14.2605	1076.48	14.2605	101.769
-Penn J-6 Spot 86	129.053	100735	3.93434	13.2543	0.982348	1.73122	1.43444	0.166493	1.04528	0.728701	992.759	9.61751	1020.2	9.23249	1079.59	19.7116	1079.59	19.7116	91.9569
-Penn J-6 Spot 269	36.6636	118119	1.4614	13.2252	0.994556	1.80005	1.6087	0.172732	1.26443	0.785994	1027.15	12.0057	1045.47	10.5012	1083.99	19.936	1083.99	19.936	94.756
-Penn J-6 Spot 243	404.104	1.58291e+06	3.70267	13.2145	0.497046	1.84868	1.24458	0.177255	1.14102	0.916791	1051.96	11.0749	1062.96	8.20126	1085.62	9.95622	1085.62	9.95622	96.8996
-Penn J-6 Spot 164	331.746	88582.7	2.41762	13.2102	0.479581	1.9687	0.968948	0.188703	0.84194	0.868921	1114.34	8.61597	1104.86	6.52454	1086.26	9.60585	1086.26	9.60585	102.586
-Penn J-6 Spot 227	555.074	117520	2.29473	13.181	0.743268	1.83992	1.48938	0.175968	1.29066	0.866575	1044.91	12.45	1059.83	9.79809	1090.67	14.8842	1090.67	14.8842	95.8043
-Penn J-6 Spot 216	142.347	352672	2.24883	13.176	0.866594	1.8895	1.21072	0.180642	0.845497	0.69834	1070.48	8.33933	1077.41	8.0391	1091.46	17.3401	1091.46	17.3401	98.0781
-Penn J-6 Spot 273	96.6316	87919.9	1.11906	13.1358	0.791025	1.86251	1.20816	0.177519	0.913197	0.755858	1053.4	8.8748	1067.88	7.98205	1097.54	15.8495	1097.54	15.8495	95.9786
-Penn J-6 Spot 202	46.2622	25352.9	3.54851	13.1329	1.16719	1.86004	1.53288	0.177243	0.993683	0.648245	1051.9	9.64429	1067	10.1229	1097.99	23.339	1097.99	23.339	95.8017
-Penn J-6 Spot 291	141.507	38867.7	2.18252	13.1273	0.931673	1.86623	1.38584	0.177757	1.02593	0.740297	1054.71	9.9818	1069.2	9.16239	1098.84	18.6488	1098.84	18.6488	95.984
-Penn J-6 Spot 106	409.406	94450.8	15.036	13.1209	0.636131	1.73535	1.25546	0.165211	1.08237	0.862128	985.673	9.89302	1021.74	8.08755	1099.85	12.7146	1099.85	12.7146	89.6188
-Penn J-6 Spot 54	53.3633	9727.66	2.97792	13.1178	0.859352	1.99775	1.30923	0.190147	0.987723	0.75443	1122.17	10.1729	1114.75	8.85937	1100.32	17.1914	1100.32	17.1914	101.986
-Penn J-6 Spot 133	223.785	126971	2.70284	13.0904	0.664532	2.00112	1.24658	0.19007	1.05468	0.846062	1121.76	10.8588	1115.89	8.44012	1104.5	13.2853	1104.5	13.2853	101.563
-Penn J-6 Spot 129	272.222	25664	2.63858	13.0237	1.15857	1.78527	1.65985	0.168704	1.18862	0.716103	1004.97	11.0607	1040.1	10.8032	1114.71	23.1116	1114.71	23.1116	90.1552
-Penn J-6 Spot 9	34.3032	7791.87	3.24589	13.0185	1.34862	1.98759	1.82957	0.187748	1.23635	0.675758	1109.16	12.5982	1111.3	12.3596	1115.5	26.9371	1115.5	26.9371	99.4316
-Penn J-6 Spot 139	53.4385	85963.8	0.934615	13.0005	0.819168	1.81629	1.227	0.17133	0.913507	0.744504	1019.43	8.61358	1051.35	8.03511	1118.27	16.3533	1118.27	16.3533	91.1615
-Penn J-6 Spot 170	173.394	25836.3	2.24606	12.9897	0.731837	1.87034	1.36544	0.176282	1.15276	0.844237	1046.63	11.1366	1070.65	9.03446	1119.9	14.5972	1119.9	14.5972	93.4577
-Penn J-6 Spot 66	78.7237	44537.6	5.13698	12.9812	0.767793	2.05082	1.38874	0.193166	1.15719	0.833268	1138.5	12.0768	1132.57	9.47926	1121.22	15.3299	1121.22	15.3299	101.542
-Penn J-6 Spot 108	156.454	54186.4	2.72638	12.9784	0.743196	1.96816	1.24496	0.18534	0.99879	0.802267	1096.08	10.0674	1104.68	8.38238	1121.62	14.8398	1121.62	14.8398	97.723
-Penn J-6 Spot 232	48.6045	41427.1	4.3642	12.9667	0.877545	1.92896	1.3618	0.181484	1.04135	0.764688	1075.08	10.3116	1091.18	9.10678	1123.43	17.4988	1123.43	17.4988	95.6959
-Penn J-6 Spot 285	138.096	53723.9	2.78637	12.9417	0.689964	2.08082	1.15742	0.195395	0.929285	0.802894	1150.54	9.79197	1142.51	7.93776	1127.27	13.7412	1127.27	13.7412	102.064
-Penn J-6 Spot 311	720.333	949338	3.18059	12.9393	0.580733	2.0897	1.28708	0.196193	1.14862	0.892422	1154.84	12.1445	1145.43	8.83924	1127.67	11.5701	1127.67	11.5701	102.409
-Penn J-6 Spot 37	177.206	66003.3	2.95913	12.903	0.583854	2.00971	1.10096	0.188153	0.933391	0.8478	1111.36	9.52844	1118.79	7.46477	1133.23	11.6415	1133.23	11.6415	98.0705
-Penn J-6 Spot 3	146.578	56653.3	2.35713	12.8959	0.665161	2.04723	1.12923	0.19156	0.912531	0.808103	1129.82	9.45705	1131.37	7.70337	1134.37	13.2416	1134.37	13.2416	99.5989
-Penn J-6 Spot 42	334.076	69925.5	5.57254	12.8815	0.52992	1.98642	1.16103	0.185662	1.03305	0.889764	1097.83	10.428	1110.9	7.84158	1136.6	10.5349	1136.6	10.5349	96.5894
-Penn J-6 Spot 14	246.986	500593	2.68476	12.8631	0.650946	2.04201	1.34746	0.190586	1.1798	0.87557	1124.55	12.1746	1129.63	9.18449	1139.43	12.9368	1139.43	12.9368	98.6939
-Penn J-6 Spot 182	59.4527	41782.3	2.20033	12.8498	1.07066	2.00512	1.6225	0.186949	1.2191	0.751369	1104.83	12.3779	1117.24	10.9928	1141.46	21.2881	1141.46	21.2881	96.7908
-Penn J-6 Spot 110	73.3211	25359.4	2.31441	12.8213	0.840965	1.98575	1.34798	0.184733	1.05348	0.781527	1092.78	10.5894	1110.68	9.10324	1145.86	16.7023	1145.86	16.7023	95.3674
-Penn J-6 Spot 107	250.65	88459	3.4273	12.8058	0.590495	2.06543	0.9268	0.191914	0.714334	0.770754	1131.73	7.41448	1137.42	6.34075	1148.29	11.711	1148.29	11.711	98.5582
-Penn J-6 Spot 309	69.1053	19487.7	2.03971	12.742	1.06569	1.88802	1.36294	0.174555	0.84965	0.623395	1037.16	8.13988	1076.88	9.04742	1158.18	21.1441	1158.18	21.1441	89.551
-Penn J-6 Spot 23	1165.62	32918.9	4.44935	12.7377	1.47763	1.84927	1.83954	0.170914	1.09569	0.59563	1017.15	10.31	1063.17	12.1235	1158.86	29.2914	1158.86	29.2914	87.7715
-Penn J-6 Spot 301	264.927	1.45264e+06	2.01526	12.7276	0.67263	2.10603	1.36451	0.194491	1.18721	0.87006	1145.66	12.4613	1150.78	9.39459	1160.42	13.3451	1160.42	13.3451	98.728
-Penn J-6 Spot 203	207.667	88904.8	11.9925	12.7212	0.547147	2.13668	1.01927	0.197222	0.859968	0.843708	1160.38	9.13233	1160.75	7.05012	1161.43	10.8658	1161.43	10.8658	99.9097
-Penn J-6 Spot 173	103.724	156292	2.03504	12.7174	0.730536	2.04213	1.37473	0.188438	1.16456	0.847119	1112.91	11.9035	1129.67	9.37058	1162.02	14.4843	1162.02	14.4843	95.7736
-Penn J-6 Spot 146	245.669	234654	2.60221	12.7118	0.772759	2.15219	1.43906	0.198508	1.21398	0.84359	1167.3	12.9618	1165.76	9.97681	1162.88	15.324	1162.88	15.324	100.38
-Penn J-6 Spot 290	55.1177	13169.3	1.9769	12.6939	0.852304	2.14206	1.30795	0.197295	0.99212	0.758532	1160.77	10.5389	1162.49	9.05418	1165.68	16.8977	1165.68	16.8977	99.5785
-Penn J-6 Spot 29	291.269	297332	3.50642	12.6861	0.526971	2.051	1.25855	0.188791	1.14291	0.908119	1114.82	11.7006	1132.63	8.5908	1166.89	10.4575	1166.89	10.4575	95.5377
-Penn J-6 Spot 263	122.666	205566	1.11138	12.6661	0.721218	2.09945	1.00132	0.192946	0.694616	0.693699	1137.31	7.24233	1148.63	6.88702	1170.06	14.2985	1170.06	14.2985	97.2012
-Penn J-6 Spot 284	96.0398	52481.4	4.16373	12.6609	1.11432	1.70265	1.41193	0.156415	0.867076	0.614108	936.825	7.56034	1009.53	9.03212	1170.87	22.0552	1170.87	22.0552	80.0112
-Penn J-6 Spot 192	152.213	111816	3.41103	12.6523	0.775059	2.25105	1.38025	0.206653	1.14209	0.827453	1210.96	12.609	1197.12	9.70427	1172.23	15.3395	1172.23	15.3395	103.304
-Penn J-6 Spot 188	264.951	121325	3.68201	12.6108	0.707256	2.24265	1.44317	0.205207	1.25799	0.871683	1203.23	13.8079	1194.49	10.135	1178.72	14.0043	1178.72	14.0043	102.079
-Penn J-6 Spot 239	26.5167	23950.8	1.63232	12.5953	1.89719	1.80034	2.28325	0.164532	1.27039	0.556396	981.911	11.5706	1045.58	14.9059	1181.16	37.5119	1181.16	37.5119	83.1313
-Penn J-6 Spot 218	78.9173	168420	1.6594	12.5504	0.785952	2.33521	1.24549	0.212653	0.966194	0.775753	1242.93	10.9224	1223.06	8.85493	1188.17	15.521	1188.17	15.521	104.609
-Penn J-6 Spot 17	174.971	75319.4	3.68149	12.5181	0.815877	2.15963	1.41155	0.196159	1.15188	0.816036	1154.65	12.1771	1168.15	9.79678	1193.25	16.0923	1193.25	16.0923	96.7654
-Penn J-6 Spot 99	398.038	97989.6	4.8247	12.4906	0.485858	2.2055	1.37931	0.199883	1.2909	0.935907	1174.69	13.8628	1182.79	9.63641	1197.6	9.5889	1197.6	9.5889	98.0873
-Penn J-6 Spot 51	682.819	111434	2.39176	12.4703	0.494684	2.26041	1.19265	0.204528	1.08522	0.909923	1199.6	11.8788	1200.03	8.39594	1200.8	9.74371	1200.8	9.74371	99.9003
-Penn J-6 Spot 287	234.366	92830.4	2.69338	12.3475	0.746012	2.26994	1.2032	0.203367	0.944006	0.784582	1193.38	10.2843	1203	8.48108	1220.28	14.6639	1220.28	14.6639	97.7956
-Penn J-6 Spot 298	421.033	1.546e+06	3.31142	12.3239	0.665472	2.25553	1.4333	0.20169	1.26945	0.885682	1184.39	13.7349	1198.51	10.0834	1224.04	13.0687	1224.04	13.0687	96.7606
-Penn J-6 Spot 236	985.843	216265	17.4625	12.2887	0.576926	2.26127	1.17475	0.201627	1.02332	0.871099	1184.05	11.069	1200.3	8.27084	1229.69	11.334	1229.69	11.334	96.289
-Penn J-6 Spot 153	458.909	629796	4.38059	12.27	0.665595	2.3546	1.50018	0.209628	1.34445	0.896188	1226.84	15.0197	1228.95	10.6922	1232.68	13.0742	1232.68	13.0742	99.526
-Penn J-6 Spot 226	588.227	280011	2.13985	12.2474	0.522199	2.36163	1.14148	0.209867	1.01503	0.889222	1228.11	11.3502	1231.08	8.14272	1236.27	10.2405	1236.27	10.2405	99.3396
-Penn J-6 Spot 204	90.3315	48282	3.36489	12.2106	0.794875	2.37939	1.19852	0.21081	0.89701	0.748431	1233.13	10.0677	1236.43	8.56867	1242.16	15.5758	1242.16	15.5758	99.2733
-Penn J-6 Spot 210	333.796	478558	1.21454	12.1347	0.565956	2.41179	1.33327	0.212352	1.20719	0.905434	1241.34	13.6309	1246.12	9.57015	1254.4	11.0518	1254.4	11.0518	98.9588
-Penn J-6 Spot 120	298.1	119420	2.40539	12.0536	0.738648	2.47816	1.54205	0.216737	1.35364	0.877813	1264.61	15.5438	1265.68	11.1565	1267.49	14.4031	1267.49	14.4031	99.7727
-Penn J-6 Spot 300	331.522	222400	2.52454	11.9964	0.569503	2.46626	1.3943	0.214672	1.27269	0.91278	1253.66	14.4996	1262.2	10.0734	1276.76	11.0855	1276.76	11.0855	98.1906
-Penn J-6 Spot 131	101.114	34168.3	1.62825	11.9933	0.542175	2.38242	1.2111	0.207321	1.08297	0.894199	1214.53	11.9882	1237.34	8.66189	1277.26	10.5524	1277.26	10.5524	95.0888
-Penn J-6 Spot 22	34.4917	22024.6	2.09773	11.9889	0.897171	2.49795	1.29402	0.217295	0.932511	0.72063	1267.57	10.7307	1271.44	9.38327	1277.98	17.4765	1277.98	17.4765	99.1855
-Penn J-6 Spot 57	182.887	94835.4	3.16883	11.9684	0.71406	2.45577	1.00744	0.21326	0.710672	0.705423	1246.16	8.05273	1259.12	7.26941	1281.31	13.9128	1281.31	13.9128	97.2567
-Penn J-6 Spot 166	53.1468	25290.7	3.12189	11.8773	0.968625	2.60845	1.33178	0.224796	0.914007	0.686304	1307.17	10.8141	1303.02	9.77548	1296.18	18.8357	1296.18	18.8357	100.848
-Penn J-6 Spot 237	212.296	339192	3.23327	11.7844	0.661158	2.61901	1.04175	0.22394	0.805059	0.772792	1302.66	9.49549	1305.99	7.6551	1311.44	12.8275	1311.44	12.8275	99.3304
-Penn J-6 Spot 222	168.849	103063	1.26958	11.7183	0.710603	2.64595	1.21588	0.224975	0.986613	0.81144	1308.11	11.6808	1313.52	8.95989	1322.34	13.7656	1322.34	13.7656	98.9238
-Penn J-6 Spot 79	98.5151	157574	1.07621	11.714	0.812196	2.64449	1.26064	0.224768	0.964133	0.764796	1307.02	11.4061	1313.11	9.28835	1323.05	15.7318	1323.05	15.7318	98.7878
-Penn J-6 Spot 283	42.6462	56377.3	1.46018	11.711	0.871304	2.44546	1.13822	0.207799	0.732376	0.643439	1217.08	8.12271	1256.09	8.20312	1323.54	16.8782	1323.54	16.8782	91.9565
-Penn J-6 Spot 8	325.027	202286	4.98551	11.6774	0.689355	2.50484	1.50577	0.212234	1.33871	0.889051	1240.71	15.1089	1273.44	10.9274	1329.1	13.3421	1329.1	13.3421	93.3495
-Penn J-6 Spot 97	134.53	124908	3.14507	11.6584	0.458705	2.70535	0.940011	0.22885	0.820494	0.872856	1328.47	9.85022	1329.93	6.96889	1332.25	8.87513	1332.25	8.87513	99.716
-Penn J-6 Spot 266	70.6096	84837.7	2.26071	11.5427	0.656784	2.66351	1.18218	0.223074	0.982951	0.831471	1298.1	11.5571	1318.4	8.72735	1351.53	12.6733	1351.53	12.6733	96.0468
-Penn J-6 Spot 39	60.7397	116582	2.12299	11.4936	0.607663	2.74341	1.21661	0.228789	1.05399	0.86633	1328.15	12.6506	1340.3	9.05349	1359.74	11.7112	1359.74	11.7112	97.6766
-Penn J-6 Spot 53	90.1894	331374	2.77714	11.4865	0.748456	2.77048	1.23957	0.230904	0.988108	0.797135	1339.23	11.949	1347.62	9.24853	1360.94	14.422	1360.94	14.422	98.4054
-Penn J-6 Spot 10	125.501	102122	3.42624	11.4324	0.704944	2.88345	1.35211	0.239188	1.1538	0.853333	1382.47	14.3566	1377.6	10.1942	1370.03	13.5668	1370.03	13.5668	100.909
-Penn J-6 Spot 261	150.594	155614	3.59221	11.4236	0.702533	2.92405	1.09279	0.242367	0.837047	0.765969	1398.99	10.5267	1388.15	8.26852	1371.52	13.5177	1371.52	13.5177	102.003
-Penn J-6 Spot 255	196.004	75935.1	3.35004	11.4124	0.696042	2.88619	1.18619	0.238996	0.960511	0.809742	1381.48	11.9438	1378.31	8.94536	1373.4	13.3894	1373.4	13.3894	100.588
-Penn J-6 Spot 46	188.137	104530	2.31199	11.3779	0.640866	2.83881	1.06761	0.234361	0.853859	0.799788	1357.31	10.4508	1365.85	8.01659	1379.22	12.3168	1379.22	12.3168	98.4114
-Penn J-6 Spot 200	279.4	163189	2.1436	11.3479	0.460662	2.92123	1.09978	0.240529	0.998652	0.908047	1389.45	12.4823	1387.42	8.31934	1384.3	8.84729	1384.3	8.84729	100.372
-Penn J-6 Spot 45	1144.71	2.26297e+06	3.68235	11.3429	0.752735	2.66795	1.19943	0.219579	0.933825	0.778555	1279.65	10.8384	1319.63	8.85872	1385.13	14.4552	1385.13	14.4552	92.3847
-Penn J-6 Spot 118	370.234	135542	2.67766	11.2938	0.669721	2.86252	1.3147	0.234572	1.13134	0.860525	1358.42	13.857	1372.11	9.89349	1393.46	12.8464	1393.46	12.8464	97.4848
-Penn J-6 Spot 254	155.276	6.07936e+06	3.63081	11.2806	0.591289	2.82905	1.08664	0.231559	0.911684	0.838992	1342.66	11.0502	1363.27	8.15221	1395.7	11.3385	1395.7	11.3385	96.1998
-Penn J-6 Spot 253	108.995	64969.9	1.18326	11.28	0.607048	2.72431	1.12498	0.222975	0.947138	0.841916	1297.57	11.1319	1335.11	8.35594	1395.8	11.6405	1395.8	11.6405	92.9626
-Penn J-6 Spot 47	232.261	64700.1	1.68141	11.2397	0.521256	2.98738	1.13144	0.243632	1.00421	0.887555	1405.55	12.6819	1404.41	8.60743	1402.66	9.98601	1402.66	9.98601	100.206
-Penn J-6 Spot 313	220.003	6.17519e+07	3.68417	11.1537	0.769043	2.84862	1.35564	0.230538	1.11639	0.823518	1337.32	13.4829	1368.45	10.1887	1417.37	14.7037	1417.37	14.7037	94.3523
-Penn J-6 Spot 60	337.929	230061	3.28016	11.0594	0.569053	3.15005	1.39499	0.252775	1.27364	0.913014	1452.77	16.5664	1445.01	10.7518	1433.59	10.856	1433.59	10.856	101.338
-Penn J-6 Spot 169	409.201	362125	3.12028	11.0356	0.650611	3.20557	1.39744	0.256679	1.23674	0.885008	1472.83	16.2841	1458.51	10.8158	1437.69	12.4051	1437.69	12.4051	102.444
-Penn J-6 Spot 52	92.0186	90885	1.44214	11.0315	0.640351	3.00694	0.981264	0.240684	0.743525	0.757722	1390.25	9.29824	1409.38	7.47714	1438.4	12.2083	1438.4	12.2083	96.653
-Penn J-6 Spot 240	163.235	206326	2.26272	10.9563	0.631889	3.21134	1.04665	0.255292	0.834377	0.797191	1465.71	10.9389	1459.9	8.10411	1451.43	12.0258	1451.43	12.0258	100.984
-Penn J-6 Spot 26	814.897	2.54578e+06	3.25934	10.855	0.559472	3.189	1.18606	0.251173	1.04581	0.881755	1444.52	13.5341	1454.5	9.16836	1469.08	10.6223	1469.08	10.6223	98.328
-Penn J-6 Spot 172	260.627	106572	2.46987	10.8324	0.751028	3.17672	1.40891	0.249684	1.19205	0.846081	1436.85	15.3534	1451.52	10.8811	1473.04	14.2518	1473.04	14.2518	97.5427
-Penn J-6 Spot 157	272.698	35728.4	1.04074	10.7925	0.551422	2.86406	1.132	0.22428	0.988619	0.873335	1304.45	11.675	1372.51	8.51974	1480.05	10.4541	1480.05	10.4541	88.1356
-Penn J-6 Spot 68	402.333	82339.4	2.31705	10.788	0.45902	3.18139	1.21987	0.249025	1.13022	0.926504	1433.45	14.5263	1452.65	9.4244	1480.84	8.70133	1480.84	8.70133	96.7995
-Penn J-6 Spot 221	452.406	184465	2.52364	10.7594	0.628006	3.33588	1.14802	0.260427	0.961017	0.83711	1492.03	12.8002	1489.49	8.96856	1485.86	11.8967	1485.86	11.8967	100.415
-Penn J-6 Spot 248	274.786	466723	2.33862	10.7232	0.612343	3.22785	1.25669	0.251146	1.09741	0.873254	1444.38	14.2006	1463.87	9.74241	1492.24	11.5901	1492.24	11.5901	96.7925
-Penn J-6 Spot 299	241.082	117485	2.45587	10.717	0.738191	3.34302	1.31909	0.259956	1.0932	0.828749	1489.62	14.5399	1491.16	10.3102	1493.34	13.9701	1493.34	13.9701	99.7506
-Penn J-6 Spot 296	107.744	149003	2.75378	10.7155	0.678581	3.32929	1.32934	0.258852	1.14309	0.859898	1483.96	15.1522	1487.94	10.3804	1493.61	12.8415	1493.61	12.8415	99.3543
-Penn J-6 Spot 0	309.417	138389	3.35252	10.7011	0.591741	3.28346	1.53077	0.254945	1.41178	0.922263	1463.93	18.4887	1477.14	11.9151	1496.15	11.1943	1496.15	11.1943	97.8462
-Penn J-6 Spot 25	408.536	439791	2.72501	10.6314	0.690722	3.34977	1.21106	0.258399	0.994771	0.821405	1481.65	13.1678	1492.74	9.47015	1508.51	13.0438	1508.51	13.0438	98.2192
-Penn J-6 Spot 189	535.422	190068	2.3264	10.619	0.610936	3.40957	1.14333	0.262706	0.966418	0.845265	1503.67	12.9614	1506.6	8.9767	1510.71	11.5335	1510.71	11.5335	99.5343
-Penn J-6 Spot 279	590.35	327602	2.63637	10.6187	0.509618	3.43438	1.33115	0.26461	1.22974	0.923815	1513.38	16.5875	1512.3	10.4686	1510.76	9.62198	1510.76	9.62198	100.173
-Penn J-6 Spot 193	202.554	562517	1.90485	10.5992	0.571355	3.38905	0.919913	0.260638	0.720967	0.783734	1493.11	9.60907	1501.87	7.21259	1514.23	10.7811	1514.23	10.7811	98.6047
-Penn J-6 Spot 242	867.248	281041	2.75449	10.5774	0.635163	3.26743	1.21012	0.250768	1.03002	0.851177	1442.44	13.3126	1473.33	9.40826	1518.12	11.9792	1518.12	11.9792	95.0148
-Penn J-6 Spot 185	200.3	179106	3.32447	10.5245	0.651113	3.38194	1.26283	0.258259	1.08203	0.85683	1480.93	14.3167	1500.22	9.89663	1527.56	12.2647	1527.56	12.2647	96.9477
-Penn J-6 Spot 91	91.1075	272339	0.752103	10.4276	0.744118	3.06895	1.48593	0.232199	1.28618	0.865577	1346.01	15.6243	1424.97	11.3803	1544.97	13.9862	1544.97	13.9862	87.122
-Penn J-6 Spot 70	228.578	106733	3.18209	10.3346	0.685655	3.72699	1.1779	0.279474	0.957771	0.813117	1588.71	13.4862	1577.18	9.43028	1561.78	12.8588	1561.78	12.8588	101.724
-Penn J-6 Spot 44	166.028	48098.6	2.55143	10.3312	0.612242	3.5371	1.08173	0.265147	0.891797	0.824417	1516.12	12.0484	1535.55	8.56304	1562.39	11.4811	1562.39	11.4811	97.0385
-Penn J-6 Spot 310	762.59	61901.5	5.55525	10.2986	0.860756	3.42338	1.41399	0.255813	1.12181	0.793368	1468.39	14.7312	1509.78	11.1121	1568.32	16.1274	1568.32	16.1274	93.628
-Penn J-6 Spot 186	174.392	108837	2.6103	10.2875	0.671352	3.4937	1.12329	0.260786	0.900594	0.801746	1493.86	12.0086	1525.79	8.86778	1570.34	12.5749	1570.34	12.5749	95.13
-Penn J-6 Spot 141	98.2841	85258.6	1.85242	10.2661	0.587598	3.70787	0.938775	0.276196	0.732138	0.779887	1572.17	10.2144	1573.07	7.50757	1574.25	11.0003	1574.25	11.0003	99.8681
-Penn J-6 Spot 270	345.731	157467	1.74528	10.1711	0.532304	3.89526	1.11214	0.28747	0.976473	0.878016	1628.87	14.0551	1612.7	8.98587	1591.63	9.94401	1591.63	9.94401	102.34
-Penn J-6 Spot 208	1116.58	144047	2.78265	10.123	0.733029	3.41174	1.2654	0.250596	1.03145	0.815123	1441.55	13.3237	1507.1	9.93657	1600.48	13.6781	1600.48	13.6781	90.0696
-Penn J-6 Spot 87	154.229	328711	2.16446	10.1002	0.65479	3.73226	1.23376	0.273519	1.04566	0.847542	1558.64	14.4775	1578.31	9.88046	1604.69	12.2115	1604.69	12.2115	97.1303
-Penn J-6 Spot 127	69.1383	40590.5	1.36627	10.068	0.779815	3.84271	1.27512	0.280718	1.00887	0.791197	1594.98	14.2552	1601.74	10.2741	1610.63	14.5303	1610.63	14.5303	99.0281
-Penn J-6 Spot 13	101.078	236422	3.83888	10.0338	0.656998	3.92721	1.03225	0.285917	0.796176	0.771301	1621.09	11.4118	1619.31	8.35426	1616.97	12.2315	1616.97	12.2315	100.255
-Penn J-6 Spot 281	120.924	91830.2	1.42319	10.0225	0.632963	3.74513	1.35031	0.272351	1.19277	0.883329	1552.72	16.4588	1581.07	10.8218	1619.08	11.7808	1619.08	11.7808	95.9016
-Penn J-6 Spot 183	169.415	816988	2.1158	10.0018	0.647032	3.91596	1.25706	0.284187	1.07776	0.85736	1612.41	15.375	1616.98	10.1679	1622.92	12.0367	1622.92	12.0367	99.3525
-Penn J-6 Spot 116	215.266	103124	2.44463	9.94579	0.574109	4.02033	1.14282	0.290127	0.988147	0.864657	1642.16	14.325	1638.32	9.29285	1633.36	10.6672	1633.36	10.6672	100.539
-Penn J-6 Spot 171	263.574	76460.8	12.5165	9.89544	0.631468	4.10466	1.28967	0.294714	1.1245	0.871927	1665.04	16.5008	1655.23	10.5301	1642.79	11.7188	1642.79	11.7188	101.355
-Penn J-6 Spot 267	393.315	101067	3.96942	9.89311	0.509401	4.06348	1.20906	0.291688	1.09651	0.906912	1649.96	15.9622	1647.01	9.85237	1643.22	9.4529	1643.22	9.4529	100.41
-Penn J-6 Spot 123	144.773	177013	2.40547	9.89223	0.635837	4.12862	1.30183	0.296337	1.13599	0.87261	1673.12	16.7403	1659.98	10.6416	1643.39	11.799	1643.39	11.799	101.809
-Penn J-6 Spot 275	392.114	899692	2.68416	9.88188	0.645721	4.06576	1.56403	0.291521	1.42452	0.910796	1649.12	20.7279	1647.46	12.7467	1645.33	11.9794	1645.33	11.9794	100.231
-Penn J-6 Spot 62	183.65	100620	1.63733	9.86905	0.618804	4.14077	1.1856	0.296513	1.0113	0.852986	1674	14.9096	1662.39	9.69692	1647.74	11.4764	1647.74	11.4764	101.593
-Penn J-6 Spot 251	199.928	110988	3.12793	9.86882	0.607874	4.09054	0.986552	0.29291	0.777029	0.787621	1656.05	11.3481	1652.42	8.04963	1647.78	11.2737	1647.78	11.2737	100.502
-Penn J-6 Spot 196	567.588	174377	3.45289	9.85508	0.744364	3.90996	1.32985	0.279589	1.10201	0.828672	1589.29	15.5222	1615.74	10.7533	1650.37	13.7988	1650.37	13.7988	96.2993
-Penn J-6 Spot 136	735.474	221853	1.41223	9.78565	0.660737	4.12435	1.36193	0.292842	1.19092	0.874432	1655.72	17.3896	1659.14	11.1306	1663.46	12.2279	1663.46	12.2279	99.5342
-Penn J-6 Spot 152	246.259	356833	1.27849	9.78065	0.676903	4.0539	1.31263	0.287692	1.12464	0.85678	1629.99	16.1975	1645.08	10.6914	1664.41	12.5256	1664.41	12.5256	97.9321
-Penn J-6 Spot 75	180.392	442445	1.77056	9.76404	0.611759	4.05408	1.20171	0.287216	1.03434	0.860722	1627.6	14.8778	1645.12	9.78795	1667.55	11.3154	1667.55	11.3154	97.6045
-Penn J-6 Spot 31	113.476	69996.8	1.45661	9.7577	0.54418	4.16443	1.06012	0.294843	0.909798	0.858199	1665.69	13.3548	1667.05	8.68021	1668.75	10.0637	1668.75	10.0637	99.8163
-Penn J-6 Spot 256	402.101	92960.9	0.767233	9.75605	0.59345	3.96506	1.36399	0.28068	1.22812	0.900389	1594.79	17.3513	1627.08	11.0607	1669.06	10.9746	1669.06	10.9746	95.5498
-Penn J-6 Spot 143	84.3238	44726	1.32749	9.73782	0.674476	4.17639	1.10847	0.295087	0.879657	0.793575	1666.9	12.9206	1669.4	9.08116	1672.52	12.4678	1672.52	12.4678	99.6639
-Penn J-6 Spot 234	337.93	3.23782e+06	1.32724	9.73713	0.769823	4.14134	1.47811	0.29259	1.26182	0.85367	1654.46	18.4126	1662.5	12.0899	1672.66	14.2303	1672.66	14.2303	98.9122
-Penn J-6 Spot 272	71.0592	41473	1.56489	9.72224	0.733712	4.17816	1.13011	0.29474	0.859548	0.760586	1665.17	12.6138	1669.75	9.2592	1675.48	13.5578	1675.48	13.5578	99.3845
-Penn J-6 Spot 1	186.441	711898	1.87546	9.71682	0.639648	4.1493	1.14655	0.292541	0.95154	0.829915	1654.22	13.8832	1664.07	9.38128	1676.51	11.8196	1676.51	11.8196	98.67
-Penn J-6 Spot 268	257.288	100566	1.61355	9.67602	0.594922	4.19323	1.0549	0.294397	0.871135	0.825801	1663.47	12.7723	1672.7	8.64892	1684.28	10.9822	1684.28	10.9822	98.7639
-Penn J-6 Spot 126	226.911	186124	2.88105	9.67046	0.617552	4.25001	1.17516	0.298212	0.999811	0.85079	1682.43	14.8053	1683.74	9.65981	1685.35	11.3985	1685.35	11.3985	99.8272
-Penn J-6 Spot 72	116.575	112602	3.20431	9.65503	0.809042	4.30684	1.32769	0.301718	1.05272	0.792894	1699.82	15.7295	1694.67	10.9413	1688.29	14.9274	1688.29	14.9274	100.683
-Penn J-6 Spot 128	465.798	1.20631e+06	2.12502	9.60652	0.575088	4.35069	1.24139	0.303258	1.10014	0.886221	1707.44	16.5025	1703.03	10.2494	1697.58	10.5965	1697.58	10.5965	100.581
-Penn J-6 Spot 90	562.631	284678	2.46444	9.59397	0.709788	3.81076	1.43629	0.265276	1.24865	0.869358	1516.78	16.8761	1595.02	11.5528	1699.99	13.0749	1699.99	13.0749	89.2228
-Penn J-6 Spot 30	617.62	1.18342e+06	2.53312	9.53645	0.777481	4.28967	1.28339	0.296823	1.02109	0.795616	1675.54	15.0661	1691.38	10.5682	1711.06	14.3022	1711.06	14.3022	97.9241
-Penn J-6 Spot 257	214.83	188658	1.18429	9.53	0.585088	4.39591	1.178	0.30397	1.02242	0.867933	1710.96	15.3643	1711.57	9.74477	1712.3	10.7608	1712.3	10.7608	99.9218
-Penn J-6 Spot 181	183.312	77096.6	2.12262	9.45528	0.747855	4.50426	1.03649	0.309019	0.71765	0.692386	1735.88	10.9212	1731.76	8.61251	1726.77	13.7317	1726.77	13.7317	100.528
-Penn J-6 Spot 50	233.697	3.05696e+06	3.6776	9.4078	0.554385	4.63278	0.978021	0.316241	0.805718	0.823825	1771.34	12.4791	1755.19	8.16782	1736.01	10.1657	1736.01	10.1657	102.036
-Penn J-6 Spot 125	32.796	50836.5	2.15376	9.40213	0.843414	4.38822	1.25365	0.299366	0.927519	0.739855	1688.17	13.7757	1710.12	10.3673	1737.11	15.4645	1737.11	15.4645	97.1824
-Penn J-6 Spot 150	345.544	126457	3.04209	9.38358	0.530854	4.53906	1.43784	0.309046	1.33625	0.929349	1736.01	20.3365	1738.16	11.9644	1740.73	9.72836	1740.73	9.72836	99.7287
-Penn J-6 Spot 217	239.104	58664.8	1.65645	9.36223	0.568027	4.3889	1.17214	0.298142	1.02531	0.874732	1682.09	15.18	1710.25	9.69342	1744.9	10.4043	1744.9	10.4043	96.4001
-Penn J-6 Spot 88	145.097	59109.3	3.19502	9.36103	0.684592	4.5489	1.16669	0.308971	0.944723	0.809746	1735.64	14.3751	1739.96	9.71178	1745.14	12.5394	1745.14	12.5394	99.4559
-Penn J-6 Spot 4	501.498	254221	5.16666	9.31987	0.63059	4.54629	1.35274	0.307436	1.19677	0.884701	1728.08	18.1411	1739.48	11.2594	1753.21	11.5386	1753.21	11.5386	98.5667
-Penn J-6 Spot 76	273.874	153982	4.34692	9.29452	0.604103	4.61741	1.25627	0.311396	1.10149	0.876792	1747.57	16.8608	1752.42	10.4855	1758.19	11.0487	1758.19	11.0487	99.3962
-Penn J-6 Spot 82	404.732	111044	12.8342	9.22218	0.65808	4.62864	1.35575	0.309724	1.18532	0.874293	1739.35	18.0697	1754.45	11.3208	1772.47	12.0128	1772.47	12.0128	98.1316
-Penn J-6 Spot 132	524.531	400013	4.91972	9.20713	0.648838	4.3879	1.61491	0.293136	1.47884	0.915737	1657.18	21.6105	1710.06	13.3549	1775.45	11.8397	1775.45	11.8397	93.3387
-Penn J-6 Spot 220	289.768	315663	5.93956	9.16877	0.530586	4.85861	1.01943	0.32323	0.870466	0.853877	1805.48	13.7071	1795.11	8.58448	1783.06	9.67246	1783.06	9.67246	101.258
-Penn J-6 Spot 58	579.341	605046	3.52057	9.14173	0.772522	4.83216	1.37108	0.320522	1.13272	0.826156	1792.28	17.7237	1790.51	11.5351	1788.44	14.0745	1788.44	14.0745	100.214
-Penn J-6 Spot 305	306.807	184396	7.49837	9.12951	0.522859	4.81752	1.28982	0.319123	1.17909	0.914151	1785.45	18.3882	1787.96	10.8458	1790.88	9.52423	1790.88	9.52423	99.6966
-Penn J-6 Spot 151	59.0612	60529.7	1.13013	9.12438	0.722219	4.85166	1.33022	0.321205	1.11708	0.839776	1795.61	17.5072	1793.9	11.1991	1791.9	13.1523	1791.9	13.1523	100.207
-Penn J-6 Spot 176	290.084	378002	2.69415	9.10453	0.657348	4.86493	1.22528	0.321382	1.03403	0.843909	1796.48	16.2123	1796.2	10.3204	1795.87	11.9667	1795.87	11.9667	100.034
-Penn J-6 Spot 34	175.834	84162	3.83409	9.07402	0.58041	4.89416	0.987222	0.32223	0.79858	0.808917	1800.61	12.5457	1801.25	8.32359	1801.98	10.5581	1801.98	10.5581	99.924
-Penn J-6 Spot 84	282.807	413697	13.5751	9.06175	0.604724	4.94745	1.24216	0.325298	1.08502	0.873495	1815.55	17.1682	1810.39	10.4924	1804.44	10.9971	1804.44	10.9971	100.616
-Penn J-6 Spot 194	338.541	108579	2.80349	9.04758	0.847459	4.4661	1.48587	0.293189	1.2205	0.821404	1657.45	17.8378	1724.69	12.3277	1807.28	15.4042	1807.28	15.4042	91.7093
-Penn J-6 Spot 64	860.784	54463.7	2.88468	9.03999	0.526115	3.97135	1.17736	0.260491	1.05327	0.894604	1492.36	14.0318	1628.36	9.55027	1808.81	9.56051	1808.81	9.56051	82.5048
-Penn J-6 Spot 191	516.971	21804.7	1.76417	8.96587	0.61977	4.1438	1.2761	0.269575	1.11548	0.874138	1538.64	15.2688	1662.99	10.4386	1823.76	11.2423	1823.76	11.2423	84.3667
-Penn J-6 Spot 199	319.018	377998	3.38454	8.93874	0.654816	5.1113	1.31088	0.331509	1.13561	0.866299	1845.69	18.2264	1837.98	11.1329	1829.25	11.872	1829.25	11.872	100.899
-Penn J-6 Spot 55	260.768	114701	3.56895	8.92161	0.532176	5.02157	1.09363	0.325065	0.955411	0.873616	1814.42	15.1092	1822.97	9.26065	1832.73	9.6444	1832.73	9.6444	99.001
-Penn J-6 Spot 27	199.715	526278	4.83877	8.88356	0.592766	5.09063	0.941251	0.32813	0.731151	0.776787	1829.31	11.6448	1834.54	7.98828	1840.47	10.7323	1840.47	10.7323	99.3936
-Penn J-6 Spot 83	123.409	286981	1.27576	8.87354	0.475101	5.13716	1.01157	0.330756	0.893055	0.882843	1842.05	14.3089	1842.27	8.59787	1842.51	8.59975	1842.51	8.59975	99.9746
-Penn J-6 Spot 103	166.388	59272.9	1.4075	8.82486	0.655255	4.52779	1.12396	0.289922	0.913192	0.81248	1641.14	13.2312	1736.09	9.34817	1852.47	11.8446	1852.47	11.8446	88.5923
-Penn J-6 Spot 282	363.584	108240	1.07525	8.78986	0.673583	5.07446	1.41455	0.323638	1.24388	0.879346	1807.47	19.6059	1831.85	11.9991	1859.64	12.1654	1859.64	12.1654	97.1946
-Penn J-6 Spot 122	335.494	1.53794e+06	1.12326	8.78597	0.541778	5.23065	1.18465	0.333452	1.05351	0.889297	1855.09	16.9829	1857.62	10.0985	1860.44	9.7836	1860.44	9.7836	99.7123
-Penn J-6 Spot 297	12.1819	42388.5	3.22104	8.75397	1.22854	5.06399	1.64305	0.321651	1.09102	0.664019	1797.79	17.1167	1830.09	13.933	1867.03	22.1707	1867.03	22.1707	96.2913
-Penn J-6 Spot 302	61.1014	35339.2	4.1835	8.63898	0.73713	5.43338	1.24825	0.340581	1.00736	0.807015	1889.46	16.4979	1890.14	10.7048	1890.86	13.2634	1890.86	13.2634	99.9264
-Penn J-6 Spot 15	209.026	140068	1.83783	8.32324	0.497607	5.893	1.06184	0.355891	0.938025	0.883396	1962.67	15.8718	1960.2	9.21784	1957.59	8.88226	1957.59	8.88226	100.259
-Penn J-6 Spot 121	162.125	103754	1.6779	7.72702	0.651351	6.78342	1.0608	0.380319	0.837276	0.78929	2077.77	14.8715	2083.56	9.38756	2089.27	11.4545	2089.27	11.4545	99.4498
-Penn J-6 Spot 201	919.855	2136.65	2.03606	7.68905	2.48039	1.20102	2.68872	0.0670055	1.03773	0.385958	418.089	4.20095	801.057	14.8982	2097.93	43.5788	2097.93	43.5788	19.9287
-Penn J-6 Spot 224	26.0487	19170.1	1.46956	6.44476	1.15438	10.1779	1.75146	0.47594	1.3172	0.75206	2509.56	27.3815	2451.07	16.1944	2402.89	19.6267	2402.89	19.6267	104.439
-Penn J-6 Spot 36	234.831	218498	2.18795	5.63488	0.555334	10.0463	1.51751	0.410752	1.41225	0.930634	2218.36	26.507	2439.05	14.0145	2628.6	9.23251	2628.6	9.23251	84.3932
-Penn J-6 Spot 174	101.663	107562	1.09333	5.52849	0.672627	12.0483	1.25112	0.483303	1.05493	0.843188	2541.63	22.1582	2608.17	11.7306	2660.23	11.1492	2660.23	11.1492	95.5418
-Penn J-6 Spot 215	127.368	71521	1.62241	5.48955	0.68575	12.517	1.17724	0.498568	0.956893	0.812827	2607.64	20.5225	2644	11.0696	2671.94	11.3539	2671.94	11.3539	97.5935
-Penn J-6 Spot 289	55.3311	87639.7	4.75766	5.40736	0.603872	13.2315	1.17578	0.519137	1.00886	0.858035	2695.52	22.2248	2696.31	11.1003	2696.88	9.97181	2696.88	9.97181	99.9495
-Penn J-6 Spot 100	74.422	74220.2	6.07998	5.23671	0.519173	13.5129	1.04468	0.513446	0.906538	0.867768	2671.32	19.8259	2716.19	9.87689	2749.71	8.53398	2749.71	8.53398	97.1491
-Penn J-6 Spot 280	168.484	149356	1.30533	5.23476	0.620795	13.7568	1.03228	0.522519	0.824746	0.79896	2709.85	18.2465	2733.11	9.77157	2750.33	10.2039	2750.33	10.2039	98.5284
-Penn J-6 Spot 274	703.471	238270	30.172	5.21319	0.795967	11.9268	1.24963	0.451145	0.963337	0.770896	2400.34	19.3065	2598.68	11.7075	2757.11	13.0749	2757.11	13.0749	87.06
-Penn J-6 Spot 246	380.514	21963.5	4.09771	5.11568	0.548402	13.4926	1.5003	0.500827	1.39648	0.9308	2617.35	30.0409	2714.77	14.1836	2788.08	8.97932	2788.08	8.97932	93.8766
-Penn J-6 Spot 195	598.461	7.44201e+06	4.31298	5.1075	0.622341	13.4153	1.27664	0.497161	1.11467	0.873132	2601.58	23.8615	2709.34	12.0641	2790.7	10.1881	2790.7	10.1881	93.2234
-Penn J-6 Spot 38	148.013	213354	2.3029	5.06475	0.675431	15.079	1.02873	0.55414	0.77594	0.754268	2842.37	17.8351	2820.24	9.79624	2804.45	11.0471	2804.45	11.0471	101.352
-Penn J-6 Spot 77	68.8739	111945	1.71307	5.05455	0.765969	14.5093	1.36405	0.53213	1.12868	0.827448	2750.42	25.2704	2783.61	12.958	2807.75	12.5242	2807.75	12.5242	97.9582
-Penn J-6 Spot 142	561.185	3.28645e+06	1.44674	5.04672	0.646773	13.9757	1.45118	0.511764	1.29908	0.895189	2664.16	28.3493	2748.06	13.752	2810.28	10.5727	2810.28	10.5727	94.8003
-Penn J-6 Spot 56	197.431	495908	1.95272	5.03731	0.825471	14.9654	1.35998	0.546985	1.08081	0.794724	2812.62	24.6354	2813.04	12.9448	2813.33	13.4902	2813.33	13.4902	99.9747
-Penn J-6 Spot 241	73.5692	205359	0.961145	4.99591	0.675431	14.0323	1.25737	0.508665	1.06055	0.843468	2650.93	23.051	2751.89	11.9183	2826.81	11.021	2826.81	11.021	93.7779
-Penn J-6 Spot 43	292.561	7.47522e+06	3.55348	4.96678	0.57637	14.9856	1.22707	0.540055	1.08328	0.88282	2783.68	24.4886	2814.33	11.6806	2836.35	9.39627	2836.35	9.39627	98.1432
-Penn J-6 Spot 258	71.7163	44409.4	0.570448	4.5137	0.562326	18.0224	1.19676	0.590247	1.05642	0.882733	2990.42	25.277	2990.93	11.5134	2991.26	9.04351	2991.26	9.04351	99.972
-Penn J-6 Spot 179	57.6641	68083.1	1.52386	3.20171	0.574905	29.6545	1.23972	0.688906	1.09836	0.885973	3378.44	28.8816	3475.43	12.1779	3531.81	8.86211	3531.81	8.86211	95.6577
-Penn J-6 Spot 264	62.3837	1.73325e+06	1.6524	2.74328	0.516007	37.4373	1.04121	0.745181	0.904352	0.86856	3589.74	24.8931	3705.16	10.2976	3768.16	7.82967	3768.16	7.82967	95.265
PennJ7							Isotope ratios						Apparent ages (Ma)
Analysis	U	206Pb	U/Th	206Pb*	±	207Pb*	±	206Pb*	±	error	206Pb*	±	207Pb*	±	206Pb*	±	Best age	±	Conc
	(ppm)	204Pb		207Pb*	(%)	235U*	(%)	238U	(%)	corr.	238U*	(Ma)	235U	(Ma)	207Pb*	(Ma)	(Ma)	(Ma)	(%)
-Penn J-7 Spot 165	926.584	747.954	3.2186	8.87009	3.35328	0.535164	3.99804	0.0344431	2.17711	0.544545	218.297	4.673	435.231	14.1526	1843.22	60.7041	218.297	4.673	NA
-Penn J-7 Spot 72	28.5208	5250.04	1.19364	14.6495	2.32611	0.424668	2.67796	0.0451399	1.3269	0.495489	284.614	3.69438	359.383	8.10547	875.625	48.1488	284.614	3.69438	NA
-Penn J-7 Spot 68	291.351	3019.17	1.22358	13.2692	1.83505	0.496207	2.21917	0.0477743	1.24792	0.562335	300.843	3.66802	409.132	7.47309	1077.33	36.8564	300.843	3.66802	NA
-Penn J-7 Spot 104	7.28211	737.115	1.39097	27.9785	6.87072	0.266582	7.04022	0.054118	1.53555	0.218111	339.754	5.082	239.957	15.0468	NA	NA	339.754	5.082	NA
-Penn J-7 Spot 224	870.891	78584.5	0.831619	18.2882	0.763937	0.43092	1.36193	0.0571813	1.1275	0.827868	358.461	3.93132	363.829	4.16454	398.171	17.1227	358.461	3.93132	NA
-Penn J-7 Spot 230	805.389	1033.34	2.03544	9.85015	1.35533	0.81115	1.86529	0.0579738	1.28156	0.687056	363.291	4.52703	603.099	8.48268	1651.29	25.124	363.291	4.52703	NA
-Penn J-7 Spot 106	211.826	53777.3	9.94065	17.5036	0.875548	0.462254	1.26401	0.0587077	0.911664	0.721249	367.762	3.25891	385.825	4.05733	495.625	19.2818	367.762	3.25891	NA
-Penn J-7 Spot 39	690.886	32117.1	1.26375	18.3601	0.55232	0.482901	1.16474	0.0643312	1.02545	0.880416	401.912	3.99557	400.061	3.85128	389.363	12.3982	401.912	3.99557	103.223
-Penn J-7 Spot 275	366.801	35503.4	0.734137	17.195	0.734008	0.516961	1.35926	0.0644984	1.14403	0.84166	402.925	4.46849	423.12	4.70346	534.707	16.0804	402.925	4.46849	75.3544
-Penn J-7 Spot 79	212.628	31750.9	1.75363	17.8798	0.921341	0.497378	1.55204	0.0645263	1.24898	0.804735	403.094	4.88038	409.926	5.23468	448.564	20.4701	403.094	4.88038	89.8632
-Penn J-7 Spot 142	549.596	16340.1	2.27429	17.2397	0.916619	0.516157	1.60958	0.0645653	1.32308	0.822006	403.33	5.17287	422.581	5.56396	529.045	20.099	403.33	5.17287	76.2374
-Penn J-7 Spot 154	133.223	34267	1.20848	17.9409	1.01081	0.501898	1.64684	0.0653353	1.30013	0.789469	407.991	5.14004	412.986	5.58806	440.978	22.4998	407.991	5.14004	92.5196
-Penn J-7 Spot 304	80.7277	62726.2	1.00479	17.9508	1.09378	0.507439	1.54787	0.0660931	1.09524	0.70758	412.575	4.37713	416.726	5.2907	439.75	24.3515	412.575	4.37713	93.8203
-Penn J-7 Spot 157	97.2003	39559.9	1.09132	18.0206	1.03956	0.505952	1.41355	0.0661557	0.957833	0.677608	412.953	3.83137	415.723	4.82217	431.105	23.1723	412.953	3.83137	95.7894
-Penn J-7 Spot 188	230.989	63472.3	1.91661	18.0771	0.719287	0.506434	1.45632	0.0664262	1.26629	0.869514	414.588	5.08462	416.048	4.97121	424.132	16.0488	414.588	5.08462	97.7499
-Penn J-7 Spot 85	504.97	39210.7	3.54237	18.1128	0.792154	0.508875	1.65255	0.0668784	1.45031	0.877622	417.321	5.86071	417.692	5.65909	419.721	17.6883	417.321	5.86071	99.4283
-Penn J-7 Spot 75	35.5266	4547.8	0.80298	18.4796	1.86804	0.498849	2.20562	0.0668882	1.17267	0.531676	417.381	4.73944	410.923	7.45382	374.78	42.0251	417.381	4.73944	111.367
-Penn J-7 Spot 248	39.9895	1925.09	1.10755	19.6497	1.6952	0.474023	2.02073	0.067584	1.09984	0.544281	421.584	4.4884	393.964	6.59841	234.926	39.0977	421.584	4.4884	179.454
-Penn J-7 Spot 185	61.2943	24781	1.69107	18.3175	1.07035	0.50871	1.3398	0.0676121	0.805855	0.601475	421.753	3.28993	417.582	4.58709	394.578	24.0055	421.753	3.28993	106.887
-Penn J-7 Spot 150	84.6985	20051.9	1.28737	17.6986	1.50614	0.526995	1.77226	0.0676758	0.934056	0.527042	422.138	3.81668	429.814	6.21058	471.149	33.3414	422.138	3.81668	89.5975
-Penn J-7 Spot 15	225.124	24564.7	0.614385	18.2085	0.691254	0.513854	1.44129	0.0678892	1.26471	0.877484	423.426	5.18304	421.037	4.96754	407.949	15.4671	423.426	5.18304	103.794
-Penn J-7 Spot 159	558.771	580065	2.69485	17.9962	0.644566	0.522616	1.33793	0.0682419	1.17243	0.8763	425.555	4.8282	426.897	4.66292	434.13	14.3567	425.555	4.8282	98.0248
-Penn J-7 Spot 66	432.334	12083.8	1.83706	16.5263	0.906479	0.569115	1.64576	0.0682437	1.37361	0.834639	425.566	5.65686	457.442	6.06102	620.89	19.5789	425.566	5.65686	68.5413
-Penn J-7 Spot 292	253.908	23408.9	0.849652	17.9778	0.772552	0.523356	1.42791	0.0682688	1.20087	0.840998	425.717	4.94715	427.391	4.98115	436.405	17.2219	425.717	4.94715	97.5508
-Penn J-7 Spot 71	410.663	46006.1	1.65386	17.4209	0.625951	0.540927	1.43791	0.0683751	1.29452	0.900276	426.359	5.34073	439.036	5.12534	506.057	13.7635	426.359	5.34073	84.2512
-Penn J-7 Spot 300	167.428	10573.1	1.70556	18.1561	1.04037	0.519105	1.46054	0.0683858	1.02509	0.701855	426.423	4.22977	424.553	5.06773	414.389	23.2529	426.423	4.22977	102.904
-Penn J-7 Spot 178	202.069	14822.6	2.93628	18.1441	0.658252	0.521256	1.30433	0.0686237	1.12604	0.863314	427.859	4.66147	425.99	4.53804	415.871	14.7077	427.859	4.66147	102.883
-Penn J-7 Spot 194	317.848	29671.5	0.90312	17.8203	0.725401	0.530766	1.52309	0.0686288	1.33925	0.879299	427.889	5.54445	432.318	5.36232	455.962	16.1063	427.889	5.54445	93.8431
-Penn J-7 Spot 56	89.9973	3275.34	1.46813	18.8764	1.5111	0.504141	1.93099	0.0690492	1.20221	0.622586	430.425	5.00563	414.502	6.57173	326.784	34.2862	430.425	5.00563	131.715
-Penn J-7 Spot 46	58.5088	1552.89	1.35412	16.13	2.42777	0.591979	2.57366	0.0692833	0.854179	0.331893	431.836	3.56782	472.131	9.71769	673.062	51.9366	431.836	3.56782	64.16
-Penn J-7 Spot 179	129.36	9250.39	0.756762	17.5871	1.36169	0.544884	1.69359	0.0695322	1.00699	0.594589	433.337	4.22021	441.639	6.06527	485.141	30.042	433.337	4.22021	89.3217
-Penn J-7 Spot 34	110.285	10740.5	1.95454	18.2598	0.973828	0.525244	1.46716	0.0695899	1.09737	0.747955	433.684	4.60257	428.649	5.13019	401.645	21.8144	433.684	4.60257	107.977
-Penn J-7 Spot 280	220.054	30997.9	2.25866	18.0504	0.915093	0.532173	1.35612	0.0696993	1.00084	0.738014	434.344	4.20387	433.251	4.78275	427.422	20.4063	434.344	4.20387	101.619
-Penn J-7 Spot 215	190.916	15989.6	1.24599	17.7595	0.875463	0.546044	1.57604	0.0703635	1.31052	0.831527	438.345	5.55362	442.402	5.65205	463.562	19.4212	438.345	5.55362	94.5602
-Penn J-7 Spot 283	104.255	14365.8	1.45425	18.0265	1.11876	0.540262	1.47185	0.0706649	0.956414	0.649803	440.16	4.06925	438.597	5.24213	430.382	24.9434	440.16	4.06925	102.272
-Penn J-7 Spot 48	196.341	19917.6	1.79102	18.1996	0.763348	0.541747	1.3706	0.0715396	1.13835	0.83055	445.425	4.8993	439.576	4.89022	409.039	17.0766	445.425	4.8993	108.895
-Penn J-7 Spot 1	198.825	14488.7	1.33488	18.0186	1.03468	0.548383	1.57163	0.0716957	1.18299	0.752712	446.364	5.10175	443.937	5.65185	431.355	23.0625	446.364	5.10175	103.479
-Penn J-7 Spot 111	542.051	2445.04	1.05722	12.402	7.27989	0.799703	7.49829	0.0719627	1.79654	0.239593	447.969	7.77467	596.661	33.8439	1211.62	143.436	447.969	7.77467	36.9727
-Penn J-7 Spot 81	200.914	29197.8	2.21136	18.0853	0.923138	0.549319	1.25095	0.072084	0.844215	0.674857	448.699	3.65916	444.55	4.50358	423.116	20.6015	448.699	3.65916	106.046
-Penn J-7 Spot 305	102.687	16726.6	3.38098	18.2827	0.907318	0.544875	1.39121	0.0722812	1.05463	0.758065	449.885	4.58283	441.633	4.98229	398.836	20.3335	449.885	4.58283	112.8
-Penn J-7 Spot 227	223.191	33240.9	1.16592	17.412	1.02989	0.579629	1.57426	0.0732297	1.19064	0.756316	455.584	5.23711	464.223	5.8655	507.207	22.6608	455.584	5.23711	89.8221
-Penn J-7 Spot 308	247.383	100949	1.66012	17.8438	0.753314	0.56668	1.36942	0.0733691	1.14361	0.835101	456.422	5.03917	455.865	5.02954	453.041	16.7454	456.422	5.03917	100.746
-Penn J-7 Spot 260	728.445	219347	4.93702	17.5837	0.715513	0.576328	1.36619	0.0735304	1.16384	0.851886	457.39	5.13884	462.099	5.07188	485.593	15.7759	457.39	5.13884	94.192
-Penn J-7 Spot 97	138.974	3.20991e+06	1.75429	17.4572	0.884886	0.584119	1.4158	0.0739884	1.10521	0.78062	460.14	4.90824	467.105	5.30092	501.506	19.4604	460.14	4.90824	91.7517
-Penn J-7 Spot 87	58.0279	3340.5	1.69083	18.6378	1.49013	0.550788	1.86033	0.0744849	1.11371	0.59866	463.119	4.97687	445.513	6.70902	355.563	33.63	463.119	4.97687	130.25
-Penn J-7 Spot 223	454.403	20984.9	1.6942	17.8298	0.869663	0.579283	1.6682	0.0749419	1.42358	0.853362	465.86	6.39793	464	6.21318	454.788	19.3001	465.86	6.39793	102.435
-Penn J-7 Spot 255	81.527	13660.9	2.68415	17.9254	1.04254	0.577736	1.42378	0.0751425	0.969669	0.681053	467.063	4.36879	463.005	5.29385	442.904	23.1855	467.063	4.36879	105.455
-Penn J-7 Spot 261	105.478	12439.6	2.04795	17.7886	1.15321	0.587673	1.58454	0.0758515	1.08668	0.685802	471.313	4.93893	469.38	5.95543	459.918	25.5896	471.313	4.93893	102.478
-Penn J-7 Spot 29	66.9578	5339.19	1.83368	18.3499	1.98607	0.571022	2.42807	0.0760282	1.3968	0.575272	472.372	6.36215	458.675	8.96134	390.61	44.5763	472.372	6.36215	120.932
-Penn J-7 Spot 309	122.825	6511.94	1.20997	18.2693	1.09518	0.574825	1.39709	0.0761985	0.86743	0.620883	473.392	3.9592	461.131	5.178	400.48	24.5377	473.392	3.9592	118.206
-Penn J-7 Spot 226	42.888	4605.63	2.50391	18.0179	1.33876	0.585797	1.85554	0.076584	1.28482	0.69242	475.701	5.89182	468.18	6.95997	431.447	29.8333	475.701	5.89182	110.257
-Penn J-7 Spot 273	253.028	19730.5	0.893442	17.8172	0.868148	0.597	1.7094	0.0771793	1.47254	0.861435	479.264	6.80138	475.328	6.48857	456.394	19.2802	479.264	6.80138	105.011
-Penn J-7 Spot 131	578.087	19088.9	1.72791	17.4651	0.619371	0.61951	1.36612	0.0785067	1.21764	0.891317	487.203	5.71376	489.54	5.30624	500.513	13.6368	487.203	5.71376	97.3409
-Penn J-7 Spot 282	126.734	40027.8	4.89635	16.7877	0.72549	0.761495	1.24931	0.0927568	1.01708	0.81411	571.821	5.56538	574.872	5.48392	586.968	15.735	571.821	5.56538	97.4194
-Penn J-7 Spot 272	371.104	59713.5	1.08744	16.18	0.824703	0.80389	1.4547	0.0943765	1.19834	0.82377	581.369	6.66185	599.02	6.58258	666.419	17.6605	581.369	6.66185	87.2377
-Penn J-7 Spot 192	39.2032	26639.9	2.05397	16.5589	1.19782	0.814921	1.51498	0.0979115	0.927575	0.612269	602.158	5.33253	605.211	6.90719	616.639	25.8774	602.158	5.33253	97.6515
-Penn J-7 Spot 229	28.7932	3910.97	2.33316	13.4294	1.68586	1.05981	2.20123	0.10327	1.41537	0.642992	633.542	8.54044	733.73	11.5004	1053.2	33.9748	633.542	8.54044	60.154
-Penn J-7 Spot 107	80.5925	18956.8	1.65141	16.5609	0.7481	0.876344	1.33905	0.105304	1.11059	0.829384	645.42	6.82081	639.006	6.35032	616.374	16.1735	645.42	6.82081	104.712
-Penn J-7 Spot 123	215.625	15680.8	1.03131	16.146	0.693197	0.933126	1.47229	0.109319	1.29889	0.882224	668.79	8.25142	669.278	7.21623	670.944	14.8483	668.79	8.25142	99.679
-Penn J-7 Spot 205	239.897	19644.9	0.896668	13.179	0.852112	1.17313	1.75966	0.11218	1.53958	0.874931	685.397	10.0107	788.108	9.64567	1090.97	17.0506	685.397	10.0107	62.8246
-Penn J-7 Spot 176	221.563	102717	1.39491	15.2074	0.776703	1.14197	1.45407	0.126008	1.22925	0.845385	765.05	8.86778	773.445	7.87166	797.737	16.2992	765.05	8.86778	95.9025
-Penn J-7 Spot 174	24.2995	12634.8	3.80257	14.1618	0.957766	1.47541	1.57148	0.151607	1.24589	0.792811	909.965	10.5733	920.349	9.51079	945.325	19.6251	945.325	19.6251	96.2595
-Penn J-7 Spot 38	153.655	84715.6	2.49248	14.1514	0.577845	1.54302	1.22104	0.158439	1.07566	0.880934	948.094	9.48376	947.712	7.52299	946.842	11.8323	946.842	11.8323	100.132
-Penn J-7 Spot 152	23.7499	5244.81	3.3574	13.9211	1.36295	1.54623	1.80353	0.156183	1.18114	0.654906	935.532	10.2856	948.991	11.1211	980.36	27.7645	980.36	27.7645	95.4273
-Penn J-7 Spot 163	31.8081	7091.6	1.77764	13.9188	1.2731	1.5926	1.70763	0.16084	1.13808	0.666469	961.444	10.1652	967.314	10.6515	980.698	25.9331	980.698	25.9331	98.0366
-Penn J-7 Spot 102	9.02058	1590.98	1.37557	13.8749	2.39357	1.6886	2.65893	0.169999	1.1579	0.435476	1012.1	10.8455	1004.24	16.9581	987.089	48.6931	987.089	48.6931	102.534
-Penn J-7 Spot 284	26.5172	7977	2.01689	13.8588	1.52443	1.71455	2.04512	0.17241	1.36332	0.66662	1025.38	12.9241	1013.99	13.1167	989.48	30.9903	989.48	30.9903	103.628
-Penn J-7 Spot 21	68.7808	19107.5	1.58231	13.8187	0.757584	1.67395	1.21424	0.167841	0.948912	0.781489	1000.2	8.79139	998.685	7.71845	995.336	15.3773	995.336	15.3773	100.489
-Penn J-7 Spot 236	46.6262	249108	1.89849	13.8141	0.830764	1.58476	1.36266	0.158845	1.08013	0.79266	950.355	9.54422	964.242	8.48341	996.021	16.8629	996.021	16.8629	95.4151
-Penn J-7 Spot 209	44.0308	10364.4	0.89973	13.8141	0.979837	1.69028	1.38901	0.169421	0.984514	0.708789	1008.92	9.19471	1004.87	8.86151	996.023	19.8957	996.023	19.8957	101.295
-Penn J-7 Spot 222	60.1962	6921.8	2.51515	13.8062	0.883088	1.70351	1.38875	0.170651	1.07181	0.771782	1015.69	10.0721	1009.85	8.8855	997.174	17.9236	997.174	17.9236	101.857
-Penn J-7 Spot 211	72.6997	17217.8	2.0128	13.7782	0.776828	1.55578	1.27213	0.155535	1.0074	0.7919	931.915	8.74108	952.792	7.86313	1001.31	15.7642	1001.31	15.7642	93.0699
-Penn J-7 Spot 232	230.308	130047	2.00404	13.7422	0.661638	1.67442	1.34871	0.166959	1.17526	0.871401	995.332	10.8395	998.867	8.57419	1006.62	13.4083	1006.62	13.4083	98.8789
-Penn J-7 Spot 67	30.3223	37491.9	2.43344	13.7228	1.02378	1.66705	1.51597	0.165989	1.11805	0.737516	989.974	10.2604	996.064	9.62169	1009.48	20.7426	1009.48	20.7426	98.0681
-Penn J-7 Spot 114	303.776	540777	155.502	13.7094	0.604255	1.68936	1.69007	0.168047	1.57836	0.933901	1001.34	14.6384	1004.52	10.7801	1011.46	12.2505	1011.46	12.2505	98.9996
-Penn J-7 Spot 244	85.5746	30550.8	0.752528	13.7034	0.969741	1.66741	1.61456	0.16579	1.29089	0.799532	988.876	11.8344	996.2	10.2483	1012.34	19.6521	1012.34	19.6521	97.6822
-Penn J-7 Spot 151	539.498	88548.4	3.62537	13.7028	0.618283	1.76134	1.20344	0.175121	1.03247	0.857932	1040.27	9.91864	1031.34	7.79446	1012.44	12.5329	1012.44	12.5329	102.749
-Penn J-7 Spot 198	40.7981	10700	0.966637	13.6909	0.894914	1.78947	1.22577	0.177763	0.837642	0.683359	1054.74	8.15006	1041.63	7.98456	1014.2	18.1349	1014.2	18.1349	103.997
-Penn J-7 Spot 251	30.4895	6001.85	2.93389	13.6887	0.886652	1.69714	1.38464	0.168566	1.06353	0.768086	1004.2	9.88969	1007.46	8.84694	1014.51	17.9665	1014.51	17.9665	98.9836
-Penn J-7 Spot 28	150.151	33117.6	3.79927	13.6775	0.846377	1.80752	1.35371	0.179381	1.05649	0.780441	1063.59	10.3587	1048.18	8.84963	1016.18	17.1466	1016.18	17.1466	104.666
-Penn J-7 Spot 287	180.396	53713.5	2.67237	13.6597	0.53803	1.68021	1.22262	0.16653	1.09787	0.897967	992.965	10.1034	1001.06	7.7826	1018.82	10.8963	1018.82	10.8963	97.4622
-Penn J-7 Spot 314	32.4111	39722.2	1.85087	13.6577	1.08741	1.72251	1.40683	0.170698	0.892583	0.634465	1015.96	8.38978	1016.96	9.03805	1019.11	22.0197	1019.11	22.0197	99.6903
-Penn J-7 Spot 153	61.739	32187.7	3.04457	13.6499	0.819105	1.72071	1.30926	0.170422	1.02138	0.780122	1014.44	9.58713	1016.29	8.40794	1020.27	16.5844	1020.27	16.5844	99.4283
-Penn J-7 Spot 167	268.689	244535	1.09762	13.6376	0.794065	1.7156	1.6791	0.169762	1.47947	0.88111	1010.8	13.8411	1014.38	10.7714	1022.1	16.0726	1022.1	16.0726	98.8944
-Penn J-7 Spot 199	108.401	43341.4	3.27381	13.6276	0.723291	1.70331	1.13559	0.168423	0.875446	0.77092	1003.42	8.13484	1009.78	7.26533	1023.58	14.6365	1023.58	14.6365	98.03
-Penn J-7 Spot 288	174.631	35327.1	5.89463	13.6276	0.7796	1.77419	1.898	0.175431	1.7305	0.911749	1041.96	16.6494	1036.06	12.3257	1023.59	15.7762	1023.59	15.7762	101.796
-Penn J-7 Spot 270	38.7296	15690.8	1.71426	13.6145	1.15072	1.75985	1.51467	0.173846	0.984916	0.650251	1033.27	9.40312	1030.79	9.80736	1025.53	23.2981	1025.53	23.2981	100.755
-Penn J-7 Spot 33	92.1052	27482.3	2.62397	13.5982	0.877667	1.72755	1.21598	0.170451	0.841607	0.692124	1014.59	7.90084	1018.84	7.82027	1027.95	17.767	1027.95	17.767	98.7007
-Penn J-7 Spot 156	112.925	14704.7	2.64484	13.594	0.686745	1.83268	1.38878	0.180768	1.2071	0.86918	1071.17	11.9129	1057.24	9.12352	1028.57	13.8853	1028.57	13.8853	104.142
-Penn J-7 Spot 118	287.015	75624.8	2.35018	13.5924	0.731545	1.68822	1.3627	0.166499	1.1497	0.843689	992.793	10.5786	1004.09	8.68974	1028.82	14.8116	1028.82	14.8116	96.4985
-Penn J-7 Spot 202	402.764	403341	3.35667	13.579	0.645583	1.8115	1.29717	0.178481	1.12511	0.867357	1058.67	10.9845	1049.62	8.48664	1030.81	13.0685	1030.81	13.0685	102.703
-Penn J-7 Spot 117	113.466	29951.5	2.33806	13.5772	0.722894	1.75159	1.09859	0.172556	0.827244	0.753002	1026.18	7.84779	1027.75	7.10105	1031.07	14.6308	1031.07	14.6308	99.525
-Penn J-7 Spot 134	58.0871	13433.8	1.47449	13.5658	0.930687	1.82137	1.38663	0.17928	1.02789	0.741289	1063.04	10.0735	1053.18	9.08951	1032.77	18.8263	1032.77	18.8263	102.931
-Penn J-7 Spot 204	825.485	732759	4.73421	13.5616	0.849243	1.7342	1.27717	0.170647	0.953912	0.746895	1015.68	8.96395	1021.31	8.2254	1033.39	17.1791	1033.39	17.1791	98.2855
-Penn J-7 Spot 22	34.4615	19190.2	3.50103	13.556	1.19882	1.71441	1.60407	0.168629	1.06577	0.664418	1004.56	9.91378	1013.94	10.2874	1034.24	24.2388	1034.24	24.2388	97.13
-Penn J-7 Spot 191	191.803	39467.7	2.53209	13.5401	0.749469	1.78301	1.16915	0.175172	0.89734	0.767512	1040.54	8.6226	1039.28	7.60587	1036.6	15.1546	1036.6	15.1546	100.381
-Penn J-7 Spot 144	430.663	66941.8	24.1346	13.5391	0.718213	1.81284	1.35886	0.178089	1.15355	0.848908	1056.53	11.2412	1050.1	8.89263	1036.75	14.5235	1036.75	14.5235	101.908
-Penn J-7 Spot 12	30.933	16979	1.14658	13.5241	0.917619	1.68865	1.30011	0.165705	0.921004	0.708407	988.401	8.43967	1004.25	8.29131	1038.99	18.5456	1038.99	18.5456	95.1309
-Penn J-7 Spot 10	98.4047	39810	2.08822	13.5168	0.724443	1.7619	1.12213	0.1728	0.85695	0.76368	1027.52	8.13944	1031.55	7.26867	1040.07	14.6413	1040.07	14.6413	98.7931
-Penn J-7 Spot 100	65.8803	70434.5	2.7165	13.5146	0.829269	1.75598	1.2358	0.172192	0.916256	0.741425	1024.18	8.67659	1029.37	7.99525	1040.4	16.7582	1040.4	16.7582	98.4405
-Penn J-7 Spot 219	509.761	75127.7	4.63917	13.5134	0.530795	1.73268	1.22479	0.169891	1.1038	0.901213	1011.51	10.3331	1020.75	7.8855	1040.59	10.7318	1040.59	10.7318	97.206
-Penn J-7 Spot 147	332.888	61699.3	1.47499	13.498	0.643136	1.80491	1.50045	0.176772	1.35563	0.903481	1049.31	13.1274	1047.24	9.80394	1042.92	12.995	1042.92	12.995	100.613
-Penn J-7 Spot 196	70.1138	34262.7	1.51423	13.4921	0.734531	1.71215	1.32856	0.167613	1.10704	0.833263	998.948	10.2445	1013.09	8.51628	1043.81	14.8377	1043.81	14.8377	95.702
-Penn J-7 Spot 42	76.3255	76435.2	2.94891	13.4913	0.598398	1.77955	0.984833	0.174202	0.782187	0.794233	1035.22	7.48063	1038.01	6.40227	1043.93	12.0908	1043.93	12.0908	99.1658
-Penn J-7 Spot 267	102.746	21218.5	2.44706	13.489	0.731237	1.73432	1.11107	0.169745	0.836522	0.752897	1010.71	7.82531	1021.36	7.15581	1044.28	14.7701	1044.28	14.7701	96.7854
-Penn J-7 Spot 158	37.0296	6983.18	2.45521	13.48	1.47709	1.83562	1.87567	0.179539	1.15601	0.616319	1064.46	11.343	1058.29	12.3294	1045.62	29.7922	1045.62	29.7922	101.802
-Penn J-7 Spot 18	443.396	44872.9	11.5616	13.4666	0.710086	1.76468	1.29092	0.17243	1.07808	0.835124	1025.48	10.221	1032.57	8.36681	1047.62	14.3362	1047.62	14.3362	97.8872
-Penn J-7 Spot 61	126.949	42068.3	2.21963	13.4625	0.729216	1.81597	1.15477	0.177387	0.895404	0.775393	1052.69	8.69642	1051.23	7.56164	1048.24	14.721	1048.24	14.721	100.424
-Penn J-7 Spot 290	180.847	42281.3	2.72333	13.4593	0.646569	1.80117	1.43078	0.1759	1.27636	0.892069	1044.54	12.3079	1045.88	9.34179	1048.71	13.0528	1048.71	13.0528	99.6021
-Penn J-7 Spot 233	49.2472	15937	1.10997	13.4478	1.01292	1.7445	1.3856	0.17022	0.945454	0.682343	1013.33	8.86549	1025.13	8.94308	1050.44	20.4327	1050.44	20.4327	96.4672
-Penn J-7 Spot 181	155.246	33351.9	4.66318	13.4477	0.765419	1.73823	1.36155	0.169607	1.12603	0.827023	1009.95	10.5263	1022.81	8.7763	1050.45	15.4457	1050.45	15.4457	96.144
-Penn J-7 Spot 9	81.1535	28993.2	3.32333	13.4381	0.798427	1.8788	1.2801	0.183192	1.00059	0.781647	1084.39	9.98675	1073.64	8.48309	1051.9	16.1063	1051.9	16.1063	103.089
-Penn J-7 Spot 303	56.3917	5676	2.57312	13.4375	0.847406	1.76973	1.43051	0.17255	1.1525	0.805658	1026.15	10.9331	1034.42	9.28116	1051.98	17.0937	1051.98	17.0937	97.5442
-Penn J-7 Spot 74	71.0832	13995.3	6.77279	13.4225	0.998323	1.85563	1.62982	0.180723	1.28828	0.790442	1070.92	12.7114	1065.43	10.7541	1054.23	20.1285	1054.23	20.1285	101.584
-Penn J-7 Spot 76	398.301	302644	2.60807	13.418	0.651324	1.87289	1.3643	0.182343	1.19879	0.878683	1079.76	11.9181	1071.55	9.03119	1054.91	13.1372	1054.91	13.1372	102.356
-Penn J-7 Spot 169	109.947	10349.5	3.12006	13.4179	0.727176	1.73704	1.26152	0.169115	1.03085	0.817147	1007.23	9.6125	1022.37	8.12945	1054.93	14.6646	1054.93	14.6646	95.4788
-Penn J-7 Spot 295	53.2107	9715.82	1.84283	13.4176	1.1164	1.78605	1.71271	0.173883	1.29886	0.758364	1033.47	12.4026	1040.39	11.149	1054.96	22.4858	1054.96	22.4858	97.9624
-Penn J-7 Spot 20	513.775	102187	3.3934	13.4168	0.747421	1.82487	1.3965	0.17765	1.17965	0.844718	1054.13	11.4715	1054.44	9.1604	1055.1	15.0721	1055.1	15.0721	99.908
-Penn J-7 Spot 140	59.0986	39735.9	2.0791	13.413	1.04858	1.81377	1.34498	0.176521	0.842289	0.626248	1047.94	8.14658	1050.44	8.80338	1055.66	21.128	1055.66	21.128	99.2684
-Penn J-7 Spot 145	58.799	19074.7	3.6017	13.4118	0.876615	1.7471	1.39838	0.170017	1.0895	0.779116	1012.21	10.2058	1026.09	9.03045	1055.84	17.6717	1055.84	17.6717	95.8676
-Penn J-7 Spot 170	36.2473	5951.08	1.86534	13.4109	1.29931	1.87889	1.81588	0.182829	1.26856	0.69859	1082.41	12.6402	1073.67	12.0341	1055.98	26.184	1055.98	26.184	102.503
-Penn J-7 Spot 162	222.752	155825	6.3928	13.4098	0.72753	1.79686	1.43914	0.174834	1.24171	0.862809	1038.69	11.9121	1044.32	9.38837	1056.13	14.6693	1056.13	14.6693	98.3485
-Penn J-7 Spot 291	33.0366	10938.3	1.31515	13.3946	1.01516	1.76773	1.64127	0.171805	1.28966	0.785767	1022.05	12.1891	1033.69	10.6443	1058.42	20.4456	1058.42	20.4456	96.564
-Penn J-7 Spot 238	72.0026	13723.5	1.66512	13.3876	0.85469	1.77705	1.38689	0.17262	1.09223	0.787539	1026.53	10.3649	1037.1	9.01152	1059.47	17.2114	1059.47	17.2114	96.8904
-Penn J-7 Spot 47	130.329	29453.3	2.66819	13.3839	0.798579	1.86339	1.54127	0.180957	1.31825	0.855301	1072.2	13.0214	1068.19	10.1846	1060.03	16.052	1060.03	16.052	101.148
-Penn J-7 Spot 116	904.207	225639	2.01168	13.3703	0.618043	1.78163	1.06161	0.172841	0.863158	0.813064	1027.75	8.20004	1038.77	6.90431	1062.07	12.4353	1062.07	12.4353	96.7677
-Penn J-7 Spot 299	157.333	50326.1	2.3062	13.3061	0.592651	1.96095	1.26349	0.189323	1.11587	0.883167	1117.71	11.4508	1102.21	8.49665	1071.76	11.904	1071.76	11.904	104.287
-Penn J-7 Spot 73	62.0433	11780.7	4.79252	13.29	0.949328	1.78459	1.43457	0.172088	1.07554	0.749726	1023.6	10.1797	1039.85	9.3356	1074.19	19.0643	1074.19	19.0643	95.2907
-Penn J-7 Spot 98	215.097	22836.9	0.412433	13.2875	0.778085	1.82512	1.67045	0.175963	1.47817	0.884893	1044.89	14.2584	1054.53	10.9581	1074.57	15.607	1074.57	15.607	97.2378
-Penn J-7 Spot 69	83.8908	27902.7	1.26844	13.2867	0.729348	1.89265	1.38294	0.182463	1.17498	0.849625	1080.41	11.6879	1078.51	9.188	1074.69	14.6269	1074.69	14.6269	100.533
-Penn J-7 Spot 59	79.9145	13108.9	1.99711	13.2735	0.944079	1.87216	1.33492	0.180308	0.943789	0.706998	1068.66	9.29423	1071.29	8.83551	1076.66	18.9336	1076.66	18.9336	99.2568
-Penn J-7 Spot 203	418.714	96651.8	2.52026	13.2454	0.725681	1.88821	1.73528	0.181469	1.57626	0.908358	1074.99	15.6072	1076.95	11.5197	1080.9	14.545	1080.9	14.545	99.4535
-Penn J-7 Spot 70	72.5288	25248	2.06971	13.2166	0.85373	1.81588	1.21767	0.174138	0.868259	0.713048	1034.87	8.30124	1051.2	7.97338	1085.26	17.1031	1085.26	17.1031	95.3572
-Penn J-7 Spot 138	194.564	66141.3	2.8692	13.2152	0.719006	1.8403	1.38861	0.176462	1.18796	0.855508	1047.62	11.4867	1059.97	9.13577	1085.51	14.4147	1085.51	14.4147	96.5098
-Penn J-7 Spot 130	216.475	28457.7	2.7008	13.2129	0.687164	1.98872	1.42096	0.190661	1.24376	0.875295	1124.95	12.839	1111.69	9.60096	1085.83	13.7763	1085.83	13.7763	103.603
-Penn J-7 Spot 220	207.582	102895	0.981105	13.2015	0.671357	1.87278	1.36747	0.17939	1.19132	0.871188	1063.64	11.6812	1071.51	9.05195	1087.55	13.4371	1087.55	13.4371	97.8014
-Penn J-7 Spot 155	22.245	11656.9	1.41318	13.1995	1.24811	1.91674	1.64627	0.183573	1.0735	0.652081	1086.46	10.7333	1086.93	10.9853	1087.88	24.9956	1087.88	24.9956	99.8699
-Penn J-7 Spot 213	164.609	35964.3	2.94918	13.1913	0.936747	1.94497	1.70513	0.186161	1.42477	0.835578	1100.55	14.4148	1096.72	11.435	1089.1	18.7525	1089.1	18.7525	101.051
-Penn J-7 Spot 54	31.715	35252.7	2.75658	13.1715	1.04048	1.87106	1.43912	0.178818	0.994213	0.690849	1060.51	9.72214	1070.91	9.52324	1092.15	20.8214	1092.15	20.8214	97.103
-Penn J-7 Spot 0	156.108	24490.2	1.26377	13.1141	0.648961	1.92385	1.28643	0.183062	1.11074	0.86343	1083.68	11.0795	1089.41	8.5949	1100.86	12.997	1100.86	12.997	98.4399
-Penn J-7 Spot 13	90.1086	22690.7	1.54407	13.1003	0.67418	1.99545	1.37775	0.189675	1.20153	0.872096	1119.61	12.3491	1113.97	9.31945	1102.99	13.4994	1102.99	13.4994	101.507
-Penn J-7 Spot 139	97.512	13598.8	1.26646	13.0959	1.01905	1.91889	1.72463	0.182337	1.39136	0.806758	1079.73	13.8322	1087.68	11.5127	1103.65	20.3782	1103.65	20.3782	97.8327
-Penn J-7 Spot 190	64.4455	15475.4	1.62551	13.0812	0.927424	1.92892	1.32927	0.183083	0.952289	0.716398	1083.8	9.49992	1091.17	8.88919	1105.88	18.5184	1105.88	18.5184	98.0028
-Penn J-7 Spot 242	684.327	14960.1	3.15123	13.0758	0.645727	1.75915	1.49241	0.166901	1.34548	0.90155	995.012	12.4057	1030.54	9.66181	1106.7	12.9057	1106.7	12.9057	89.9078
-Penn J-7 Spot 91	1048.4	27162.6	10.584	13.0679	0.783255	1.71037	1.36345	0.162175	1.11602	0.818528	968.851	10.0393	1012.42	8.73656	1107.91	15.6466	1107.91	15.6466	87.4485
-Penn J-7 Spot 161	101.673	27126.5	3.78889	13.0191	0.559651	1.98972	1.03494	0.187958	0.870574	0.84118	1110.31	8.87941	1112.03	6.99382	1115.41	11.1892	1115.41	11.1892	99.5421
-Penn J-7 Spot 172	113.401	8720.01	1.48633	13.0115	0.577036	2.0184	0.918357	0.190556	0.71443	0.777943	1124.39	7.37141	1121.72	6.23559	1116.58	11.5279	1116.58	11.5279	100.699
-Penn J-7 Spot 166	210.604	741094	2.60474	12.9991	0.704471	2.00166	1.51734	0.188795	1.34389	0.885688	1114.84	13.7583	1116.07	10.2744	1118.49	14.0347	1118.49	14.0347	99.6737
-Penn J-7 Spot 214	72.723	49365	2.09111	12.9467	0.828047	1.90289	1.21145	0.178755	0.884285	0.729937	1060.17	8.64462	1082.1	8.0636	1126.52	16.5198	1126.52	16.5198	94.1104
-Penn J-7 Spot 310	130.519	25545.9	2.64993	12.9167	0.674819	2.12077	1.11677	0.198763	0.889829	0.796788	1168.67	9.51101	1155.59	7.70609	1131.12	13.4301	1131.12	13.4301	103.32
-Penn J-7 Spot 234	228.086	78730.2	3.08973	12.9066	0.786833	2.08451	1.63483	0.195211	1.43302	0.876559	1149.54	15.088	1143.72	11.2185	1132.67	15.6589	1132.67	15.6589	101.489
-Penn J-7 Spot 57	273.223	1.20383e+06	1.67588	12.8876	0.764693	1.97609	1.63261	0.184785	1.44245	0.883523	1093.06	14.5026	1107.39	11.0075	1135.65	15.1991	1135.65	15.1991	96.2494
-Penn J-7 Spot 149	78.2667	10747.9	1.43409	12.8544	0.791427	2.03213	1.38962	0.189536	1.14223	0.821971	1118.86	11.7323	1126.33	9.45673	1140.74	15.7372	1140.74	15.7372	98.0824
-Penn J-7 Spot 212	249.976	22463.1	2.15351	12.836	0.719841	2.01751	1.36693	0.187904	1.16203	0.850105	1110.01	11.8492	1121.42	9.28014	1143.62	14.2933	1143.62	14.2933	97.061
-Penn J-7 Spot 311	162.894	54261.4	2.85192	12.8185	0.752709	2.06258	1.20849	0.191839	0.94545	0.78234	1131.33	9.81014	1136.48	8.26429	1146.34	14.9554	1146.34	14.9554	98.6905
-Penn J-7 Spot 263	175.791	729215	5.76825	12.8145	0.673428	2.15484	1.56537	0.200357	1.41311	0.902732	1177.24	15.2052	1166.61	10.8568	1146.94	13.3603	1146.94	13.3603	102.642
-Penn J-7 Spot 108	238.568	53277.8	9.74362	12.6871	0.665371	2.1142	1.36144	0.194624	1.18777	0.872436	1146.37	12.4742	1153.45	9.38511	1166.75	13.1985	1166.75	13.1985	98.2536
-Penn J-7 Spot 146	26.4837	5954.79	0.704036	12.666	1.44029	2.22237	1.84539	0.204241	1.1537	0.625181	1198.06	12.6137	1188.12	12.9236	1170.08	28.5225	1170.08	28.5225	102.392
-Penn J-7 Spot 96	439.885	39249.7	5.99415	12.6597	0.665059	2.06166	1.5707	0.189377	1.42295	0.905935	1118	14.6055	1136.17	10.7399	1171.06	13.1848	1171.06	13.1848	95.4689
-Penn J-7 Spot 193	237.208	24485.5	1.90109	12.6596	0.673885	2.12229	1.57601	0.194945	1.42467	0.903973	1148.11	14.9829	1156.08	10.8777	1171.07	13.3601	1171.07	13.3601	98.0389
-Penn J-7 Spot 40	239.292	135948	5.93472	12.637	0.550986	2.19035	1.0319	0.200838	0.872488	0.845515	1179.82	9.40676	1177.98	7.19367	1174.61	10.9207	1174.61	10.9207	100.444
-Penn J-7 Spot 302	169.841	21042.6	2.74321	12.6133	1.33581	1.93628	1.60966	0.177208	0.898116	0.557955	1051.71	8.71529	1093.71	10.7783	1178.33	26.4353	1178.33	26.4353	89.254
-Penn J-7 Spot 173	292.065	207984	3.9204	12.5826	0.667918	2.20147	1.56274	0.200987	1.41282	0.904062	1180.62	15.2418	1181.51	10.9118	1183.15	13.1988	1183.15	13.1988	99.7863
-Penn J-7 Spot 294	90.7533	44760.8	3.41866	12.562	0.821526	2.20457	1.36046	0.200943	1.08441	0.79709	1180.38	11.6966	1182.49	9.50346	1186.38	16.2087	1186.38	16.2087	99.4949
-Penn J-7 Spot 14	52.9947	36104.3	2.36361	12.5454	1.01984	2.20575	1.42008	0.200783	0.988204	0.695879	1179.53	10.6519	1182.87	9.92163	1188.96	20.1381	1188.96	20.1381	99.2068
-Penn J-7 Spot 124	31.8027	21331.1	1.33962	12.4603	1.02877	2.25195	1.39636	0.2036	0.944176	0.676168	1194.63	10.296	1197.4	9.81877	1202.37	20.2559	1202.37	20.2559	99.3559
-Penn J-7 Spot 31	92.1119	25985.7	2.07259	12.4519	0.95157	2.19222	1.42711	0.198066	1.06355	0.745252	1164.92	11.3346	1178.57	9.95157	1203.74	18.7308	1203.74	18.7308	96.7749
-Penn J-7 Spot 109	35.5201	15560.9	1.5162	12.4034	1.50239	1.87692	1.91829	0.168918	1.19275	0.621778	1006.15	11.1112	1072.98	12.7082	1211.39	29.553	1211.39	29.553	83.0573
-Penn J-7 Spot 245	72.4899	47661.1	2.53997	12.3957	0.819346	2.1765	1.2229	0.195757	0.907837	0.742362	1152.49	9.58078	1173.56	8.5083	1212.66	16.1413	1212.66	16.1413	95.0379
-Penn J-7 Spot 7	62.5937	10916.7	2.158	12.3686	1.24564	2.12993	1.64602	0.19115	1.076	0.653698	1127.6	11.1311	1158.56	11.374	1216.94	24.486	1216.94	24.486	92.6586
-Penn J-7 Spot 252	47.6232	15459.7	1.57116	12.3582	1.0315	2.18583	1.42898	0.196002	0.988933	0.692056	1153.81	10.4475	1176.54	9.9555	1218.57	20.2885	1218.57	20.2885	94.685
-Penn J-7 Spot 171	184.735	20467	5.82253	12.2303	0.763282	2.26388	1.32759	0.200898	1.08623	0.818197	1180.15	11.7142	1201.11	9.3503	1239.04	14.9803	1239.04	14.9803	95.2465
-Penn J-7 Spot 17	125.349	30339.3	3.62008	12.2078	0.704181	2.39286	1.18419	0.211954	0.952063	0.803981	1239.22	10.7335	1240.47	8.4803	1242.62	13.7963	1242.62	13.7963	99.7264
-Penn J-7 Spot 258	131.589	30459.1	2.56326	12.2039	0.72875	2.4027	1.30157	0.212758	1.07843	0.82856	1243.49	12.1961	1243.41	9.33223	1243.27	14.2764	1243.27	14.2764	100.018
-Penn J-7 Spot 262	35.6043	12120.2	1.18098	12.149	1.08154	2.33315	1.55255	0.20567	1.11387	0.717442	1205.71	12.2488	1222.44	11.0352	1252.06	21.1444	1252.06	21.1444	96.2975
-Penn J-7 Spot 307	55.7782	27817.4	2.80201	12.1192	0.769339	2.49553	1.33326	0.219445	1.0889	0.816719	1278.94	12.6319	1270.74	9.66515	1256.89	15.044	1256.89	15.044	101.755
-Penn J-7 Spot 197	120.533	31009.2	1.99219	12.1169	0.748029	2.44783	1.25901	0.215208	1.01269	0.80436	1256.5	11.5612	1256.78	9.0762	1257.27	14.6247	1257.27	14.6247	99.9392
-Penn J-7 Spot 62	341.7	229333	2.27422	12.1007	0.751279	2.306	1.42898	0.202469	1.21555	0.850642	1188.57	13.194	1214.13	10.1211	1259.89	14.6652	1259.89	14.6652	94.339
-Penn J-7 Spot 253	274.453	43062.4	2.68217	12.0872	0.612144	2.38515	1.15709	0.209184	0.981899	0.848597	1224.47	10.9502	1238.16	8.27833	1262.05	11.9616	1262.05	11.9616	97.0219
-Penn J-7 Spot 206	52.326	14791.2	2.51162	12.0579	0.745352	2.36886	1.23189	0.207252	0.980818	0.796189	1214.16	10.8544	1233.26	8.79567	1266.8	14.5539	1266.8	14.5539	95.8449
-Penn J-7 Spot 89	300.074	56993.4	2.7704	11.8965	0.981494	2.09663	1.67993	0.180979	1.3634	0.811577	1072.32	13.4687	1147.7	11.5498	1293.05	19.0924	1293.05	19.0924	82.9296
-Penn J-7 Spot 256	209.542	94481.9	1.83411	11.813	0.751	2.52845	1.16477	0.216721	0.89033	0.764383	1264.53	10.223	1280.26	8.47521	1306.73	14.5814	1306.73	14.5814	96.77
-Penn J-7 Spot 148	206.553	22626.4	2.94911	11.7494	0.646971	2.37231	1.40994	0.202243	1.25275	0.888507	1187.36	13.5851	1234.3	10.0714	1317.21	12.5431	1317.21	12.5431	90.142
-Penn J-7 Spot 182	272.253	351330	3.38798	11.7417	0.620475	2.70219	1.34193	0.230215	1.18986	0.886684	1335.63	14.3539	1329.06	9.94557	1318.47	12.0276	1318.47	12.0276	101.301
-Penn J-7 Spot 297	89.3434	50584.7	1.96314	11.7414	0.76343	2.63627	1.20829	0.224593	0.936563	0.775112	1306.1	11.0729	1310.82	8.89503	1318.52	14.7976	1318.52	14.7976	99.0578
-Penn J-7 Spot 119	76.3324	29481.5	2.04045	11.7382	0.726994	2.61103	1.12428	0.222382	0.857606	0.762804	1294.45	10.0577	1303.74	8.25458	1319.06	14.0906	1319.06	14.0906	98.1346
-Penn J-7 Spot 143	463.86	45240.7	1.36079	11.6766	0.801493	2.65358	1.74202	0.224821	1.54669	0.88787	1307.3	18.3015	1315.64	12.8475	1329.24	15.5131	1329.24	15.5131	98.3497
-Penn J-7 Spot 110	384.293	428922	1.95975	11.6053	0.616074	2.78842	1.43946	0.234802	1.30096	0.903783	1359.62	15.9472	1352.44	10.7583	1341.09	11.9034	1341.09	11.9034	101.381
-Penn J-7 Spot 27	138.133	45925.9	5.6875	11.5985	0.691709	2.76191	1.70265	0.232434	1.55581	0.91376	1347.24	18.9153	1345.31	12.6934	1342.22	13.3626	1342.22	13.3626	100.374
-Penn J-7 Spot 16	173.257	28523.3	1.98517	11.5972	0.679352	2.45591	1.39773	0.206659	1.22153	0.873937	1210.99	13.4863	1259.16	10.086	1342.43	13.1235	1342.43	13.1235	90.209
-Penn J-7 Spot 217	233.961	252614	1.98403	11.5599	0.639125	2.71153	1.36555	0.227435	1.20675	0.883711	1321.04	14.4144	1331.62	10.1301	1348.65	12.3361	1348.65	12.3361	97.9533
-Penn J-7 Spot 237	29.6105	56234.8	0.825578	11.5255	0.886057	2.59994	1.38074	0.217425	1.05893	0.766933	1268.26	12.1914	1300.62	10.1257	1354.41	17.0898	1354.41	17.0898	93.6388
-Penn J-7 Spot 78	196.188	24589.6	2.9643	11.4683	0.742359	2.81513	1.11323	0.234253	0.829563	0.745189	1356.75	10.1496	1359.57	8.34088	1363.99	14.2986	1363.99	14.2986	99.469
-Penn J-7 Spot 5	53.6754	33073.3	3.80728	11.4678	0.854658	2.87958	1.30052	0.239606	0.980262	0.753746	1384.65	12.2145	1376.58	9.80178	1364.07	16.4612	1364.07	16.4612	101.508
-Penn J-7 Spot 241	374.611	369084	1.91755	11.4661	0.600747	2.82804	1.17418	0.235283	1.00886	0.859205	1362.13	12.3872	1363	8.80814	1364.36	11.5706	1364.36	11.5706	99.8367
-Penn J-7 Spot 55	317.82	23215.1	4.62151	11.4584	0.780117	2.51359	1.71911	0.208981	1.53191	0.891108	1223.38	17.0703	1275.97	12.4882	1365.66	15.0223	1365.66	15.0223	89.5822
-Penn J-7 Spot 278	64.2243	24622	2.07383	11.4503	0.832269	2.82207	1.21539	0.234463	0.885723	0.728755	1357.85	10.8446	1361.42	9.11228	1367.01	16.0236	1367.01	16.0236	99.3296
-Penn J-7 Spot 120	21.0749	20106.9	4.10757	11.4456	1.19094	2.68327	1.97605	0.222838	1.57684	0.797975	1296.85	18.5237	1323.86	14.618	1367.82	22.9264	1367.82	22.9264	94.8119
-Penn J-7 Spot 312	5.34212	10424.7	2.99036	11.3366	1.63297	2.93113	2.10252	0.241104	1.32439	0.629904	1392.44	16.5856	1389.99	15.9193	1386.21	31.3573	1386.21	31.3573	100.449
-Penn J-7 Spot 164	147.34	50416.6	4.94239	11.3307	0.84128	2.96629	1.43294	0.243869	1.15999	0.809514	1406.78	14.6607	1399.03	10.8819	1387.21	16.1511	1387.21	16.1511	101.411
-Penn J-7 Spot 65	328.66	31337.5	5.0778	11.2719	0.580602	2.95468	1.44773	0.241655	1.3262	0.916059	1395.3	16.6389	1396.05	10.9833	1397.18	11.1313	1397.18	11.1313	99.8651
[truncated: 1,603 more rows]
